# Supplementary material for: A single-parasite transcriptional atlas of Toxoplasma Gondii reveals novel control of antigen expression
Source: eLife journal article supplement (doi:10.7554/elife.54129), 2020-02-17
Supplement: supp [file elife-54129-supp-v1.zip]

Archive with 18 entries (18 files):
- elife_poa_e54129_Supplementary_file_6.csv
- elife_poa_e54129_Figure_3_figure_supplement_3.pdf
- elife_poa_e54129_Figure_3_figure_supplement_1.pdf
- elife_poa_e54129_Supplementary_file_4.csv
- elife_poa_e54129_Figure_5_source_data_2.csv
- elife_poa_e54129_Figure_3_figure_supplement_4.pdf
- elife_poa_e54129_Supplementary_file_5.csv
- elife_poa_e54129_Supplementary_file_1.csv
- elife_poa_e54129_Transparent_Reporting_File.docx
- elife_poa_e54129_Figure_1_figure_supplement_2.pdf
- elife_poa_e54129_Figure_6_figure_supplement_1.pdf
- elife_poa_e54129_Figure_3_figure_supplement_2.pdf
- elife_poa_e54129_Figure_2_figure_supplement_1.pdf
- elife_poa_e54129_Figure_4_figure_supplement_1.pdf
- elife_poa_e54129_Figure_5_source_data_1.csv
- elife_poa_e54129_Supplementary_file_2.csv
- elife_poa_e54129_Supplementary_file_3.csv
- elife_poa_e54129_Figure_1_figure_supplement_1.pdf
