# Supplementary material for: A single-parasite transcriptional atlas of Toxoplasma Gondii reveals novel control of antigen expression
Source: eLife journal article supplement (doi:10.7554/elife.54129), 2020-02-17
Supplement: supp [file elife-54129-supp-v1.zip › elife_poa_e54129_Figure_5_source_data_1.csv]

exp	sample	area	perimeter	mean_sag1	std_sag1	median_sag1	mean_v5	std_v5	median_v5	Unnamed: 10	AP2 IX-1 plasmid ($\mu g$)
TF1911	00ug	6881	330.257847	36.75802936	9.128014944	36	5.458508938	5.008399983	10	thru image 51	0
TF1911	00ug	5885	308.492971	42.37417162	8.566571337000001	42	10.0526763	4.157088545	10	thru image 51	0
TF1911	00ug	5695	301.625044	37.26215979	9.942083738	36	7.373134328	4.6231745	10	thru image 51	0
TF1911	00ug	8351	373.9997861	48.54556341	16.34016547	48	7.450604717999999	4.697092673	10	thru image 51	0
TF1911	00ug	6317	327.1123516	56.62276397	15.82088853	56	8.334652525	4.316495317	10	thru image 51	0
TF1911	00ug	9885	429.39168939999996	66.26262013	22.38261849	64	8.832574608	4.252358012	10	thru image 51	0
TF1911	00ug	7188	354.0327763	44.55703951	13.93915106	42	7.988313856	4.471685084	10	thru image 51	0
TF1911	00ug	5297	291.2234339	58.90466302	14.64824762	60	8.482159713	4.288425107	10	thru image 51	0
TF1911	00ug	5828	299.23755239999997	55.90974605	14.44985961	56	8.804049417	4.174917224	10	thru image 51	0
TF1911	00ug	7652	364.1692744	47.5507057	13.54380881	46	12.10533194	4.471596742	10	thru image 51	0
TF1911	00ug	5318	283.6032754	52.54418955	13.37541947	52	11.57954118	4.2873085380000004	10	thru image 51	0
TF1911	00ug	7061	339.9508474	54.27814757	15.01805202	54	11.47996035	4.304856181	10	thru image 51	0
TF1911	00ug	8447	406.7820433	82.57464189	26.28616875	82	11.66449627	4.363285981000001	10	thru image 51	0
TF1911	00ug	8439	376.4629175	70.96883517	18.93519719	68	10.82948217	4.113719247	10	thru image 51	0
TF1911	00ug	7757	365.67024469999996	54.74384427	13.47417457	54	10.36612092	4.391259906	10	thru image 51	0
TF1911	00ug	7897	356.90500410000004	65.10902875	23.47322497	62	10.54957579	4.067173445	10	thru image 51	0
TF1911	00ug	8730	466.202634	76.78877434	23.79200285	74	9.70790378	3.8614324289999997	10	thru image 51	0
TF1911	00ug	5940	309.4375183	95.27912458	32.43187379	92	8.282828282999999	4.262099315	10	thru image 51	0
TF1911	00ug	9611	397.94938010000004	89.11892623	29.84010645	86	9.576526896	4.0209708410000005	10	thru image 51	0
TF1911	00ug	9806	393.54671510000003	63.70711809	18.25456247	62	9.38099123	3.9880317730000003	10	thru image 51	0
TF1911	00ug	7144	354.2807155	71.15901456	22.17948042	70	8.910974244	4.111142799	10	thru image 51	0
TF1911	00ug	7493	387.30404330000005	88.57413586	20.38745776	90	10.99159215	4.057325316	10	thru image 51	0
TF1911	00ug	7100	334.9246464	81.33352113	24.84822565	82	10.19577465	3.972505046	10	thru image 51	0
TF1911	00ug	9182	388.12633680000005	66.249401	23.15493125	62	4.6612938360000005	5.027932259	0	thru image 51	0
TF1911	00ug	6140	320.6506429	102.41824100000001	18.65640819	106	9.654723127	4.13306945	10	thru image 51	0
TF1911	00ug	7562	357.2999585	81.24861148	19.01107026	80	7.252049722000001	4.723509839	10	thru image 51	0
TF1911	00ug	6307	331.6697754	73.96384969	21.16037473	74	9.478357381	4.099611961	10	thru image 51	0
TF1911	00ug	8150	404.013004	80.41079755	28.17537214	74	9.630674847	3.9444593439999998	10	thru image 51	0
TF1911	00ug	10942	411.5719099	67.67373424	21.93281703	64	3.2873332110000004	4.717158891	0	thru image 51	0
TF1911	00ug	7015	334.28402539999996	60.0846757	13.45016731	60	5.166072701	5.023207125	10	thru image 51	0
TF1911	00ug	7529	338.97605239999996	62.380395799999995	16.89537154	62	4.760260327	5.0211067510000005	0	thru image 51	0
TF1911	00ug	7183	355.8421585	64.09271892	18.56907839	62	7.2922177360000004	4.726340555	10	thru image 51	0
TF1911	00ug	9153	397.4010662	38.15579591	14.56792414	34	7.97552715	4.517672636	10	thru image 51	0
TF1911	00ug	7541	353.9736303	66.85532423	18.41467224	64	6.952658799	4.855636054	10	thru image 51	0
TF1911	00ug	7025	372.44910689999995	62.69950178	15.76528549	62	9.325266904	3.939349506	10	thru image 51	0
TF1911	00ug	5006	288.938018	50.96484219	11.29716498	52	8.799640431	4.240710347	10	thru image 51	0
TF1911	00ug	8867	395.0867943	55.6179091	14.60709371	54	7.212134882000001	4.757649927	10	thru image 51	0
TF1911	00ug	9366	417.310983	78.12193039	22.52330289	76	9.54729874	4.178103073	10	thru image 51	0
TF1911	00ug	9582	410.97943510000005	64.22103945	24.08526031	58	7.902316844	4.446583878999999	10	thru image 51	0
TF1911	00ug	8709	374.1146952	76.03467677	20.26927571	74	6.283155357	4.917623418	10	thru image 51	0
TF1911	00ug	6376	315.6609117	71.43193225	21.92176628	72	8.759410289	4.1404164869999995	10	thru image 51	0
TF1911	00ug	8153	356.9736105	83.32049552	19.29140827	82	8.48276708	4.418210886000001	10	thru image 51	0
TF1911	00ug	7216	341.4449326	66.79684036	17.14689771	66	9.239190687	4.1006592589999995	10	thru image 51	0
TF1911	00ug	8380	375.8744855	71.3928401	18.10760285	72	6.359188543999999	4.932034095	10	thru image 51	0
TF1911	00ug	6191	327.71037010000003	60.73041512	14.78337419	62	5.398158617000001	5.007160285	10	thru image 51	0
TF1911	00ug	8707	363.32117289999997	63.80222809	12.89961701	62	8.449523372	4.424995383	10	thru image 51	0
TF1911	00ug	9507	399.5030769	89.45934575	22.61546811	88	8.245503313	4.453455142	10	thru image 51	0
TF1911	00ug	9296	440.56920660000003	59.30378658	13.67001449	60	8.067986231	4.3699427260000006	10	thru image 51	0
TF1911	00ug	6313	343.06561089999997	77.69111358	22.83658842	76	8.582290512	4.129009172	10	thru image 51	0
TF1911	00ug	6222	318.093751	54.77081324	18.63690909	52	7.018643523	4.801071475	10	thru image 51	0
TF1911	07ug	7514	346.26928619999995	61.8518765	16.51946139	63	2.198562683	4.1449791860000005	0	thru slice 46	7
TF1911	07ug	6611	322.8817475	87.86885494	19.97850319	88	3.74527303	4.849739762	0	thru slice 46	7
TF1911	07ug	8164	354.9319693	71.60546301	20.37015721	69	1.1060754529999999	3.136647372	0	thru slice 46	7
TF1911	07ug	5518	290.78423	69.5454875	17.62647959	67	1.411743385	3.49272319	0	thru slice 46	7
TF1911	07ug	9525	378.8709124	19.27916011	4.818990604	18	11.95275591	9.478632329	10	thru slice 46	7
TF1911	07ug	7266	368.66459760000004	54.23451693	16.77697265	53	1.153316818	3.194437808	0	thru slice 46	7
TF1911	07ug	8010	347.1544958	66.98876405	26.61186124	61	2.878901373	4.5335906480000006	0	thru slice 46	7
TF1911	07ug	4685	276.7913517	49.23906083	11.67831579	49	0.629669157	2.429293719	0	thru slice 46	7
TF1911	07ug	7033	334.50904239999994	62.46708375	15.2201452	61	0.608559647	2.408607193	0	thru slice 46	7
TF1911	07ug	6347	321.65394810000004	67.59681739	16.14231761	67	1.027256972	3.0362419689999998	0	thru slice 46	7
TF1911	07ug	7551	347.08572139999995	55.27360615	19.78337897	53	3.171765329	4.654076336	0	thru slice 46	7
TF1911	07ug	7749	352.4147589	37.14737386	9.652611513	36	2.788746935	4.524857901	0	thru slice 46	7
TF1911	07ug	6478	334.36059500000005	35.2903674	10.79104395	34	3.186168571	4.771083333	0	thru slice 46	7
TF1911	07ug	9966	411.5884828	36.88902268	11.85698039	34	8.783263095	9.053555592999999	10	thru slice 46	7
TF1911	07ug	6041	290.5135121	29.67571594	10.34523059	28	62.57639464	60.74890645	51	thru slice 46	7
TF1911	07ug	13490	499.7100961	19.26567828	4.948079519	18	2.8235730169999997	4.645886517	0	thru slice 46	7
TF1911	07ug	9823	435.48231239999996	38.60785911	8.268475812	38	0.742135804	2.6213149369999997	0	thru slice 46	7
TF1911	07ug	8563	363.3873034	52.29977812	14.60855534	51	28.32990774	24.74047733	20	thru slice 46	7
TF1911	07ug	9014	360.223721	30.81850455	9.584182213	28	4.2923230530000005	5.12559153	0	thru slice 46	7
TF1911	07ug	9374	417.3658787	53.06390015	14.10748365	51	0.42671218299999997	2.021255642	0	thru slice 46	7
TF1911	07ug	7380	333.7941167	49.08441734	9.456947389	49	0.482384824	2.142842811	0	thru slice 46	7
TF1911	07ug	8032	334.82384110000004	20.73854582	5.3924658889999995	20	15.800174300000002	23.79126292	10	thru slice 46	7
TF1911	07ug	7959	351.8933687	75.02751602	24.61806511	69	2.539263727	4.355719175	0	thru slice 46	7
TF1911	07ug	9443	399.6803171	27.270359000000003	9.198594824	26	105.9598645	78.46652355	81	thru slice 46	7
TF1911	07ug	9771	383.7022872	23.28574353	5.572635695	22	12.80841265	9.637415086	10	thru slice 46	7
TF1911	07ug	9625	424.68147860000005	45.60831169	11.82250158	45	5.629090908999999	5.322280355	10	thru slice 46	7
TF1911	07ug	5478	298.9879356	54.84173056	15.7714516	55	1.39101862	3.460843808	0	thru slice 46	7
TF1911	07ug	7283	337.17571289999995	64.42056845	21.18774967	65	74.54002472	78.42041318	40	thru slice 46	7
TF1911	07ug	8936	364.2134379	28.25	8.232719604	28	19.82408236	20.4915571	10	thru slice 46	7
TF1911	07ug	7422	340.8154046	71.34505524	22.86216945	67	0.951226085	2.9340398189999997	0	thru slice 46	7
TF1911	07ug	6695	329.2029482	63.78476475	18.50553598	63	2.025392084	4.019218905	0	thru slice 46	7
TF1911	07ug	5576	284.4542214	17.28048781	4.541968066	16	19.48224534	16.19980757	10	thru slice 46	7
TF1911	07ug	6135	329.61467739999995	39.32192339	12.15934044	36	11.08981255	9.674432212000001	10	thru slice 46	7
TF1911	07ug	9095	395.5776331	62.09389775	15.88837592	61	6.496976361000001	4.887042364	10	thru slice 46	7
TF1911	07ug	5168	292.3470041	102.5733359	22.23654962	102	1.234520124	3.289871667	0	thru slice 46	7
TF1911	07ug	7055	360.17967089999996	58.24068037	15.83701598	57	1.1254429479999999	3.1605732960000004	0	thru slice 46	7
TF1911	07ug	7069	356.8859758	96.79077663	31.73384638	98	1.732918376	3.785261493	0	thru slice 46	7
TF1911	07ug	10887	451.05577850000003	25.55139157	7.007194253	24	4.007531919	5.0393580689999995	0	thru slice 46	7
TF1911	07ug	6091	328.526398	70.73666065	15.35798121	71	0.33836808399999996	1.9443667690000002	0	thru slice 46	7
TF1911	07ug	6324	351.02340449999997	90.29664769	26.83329163	90	0.687855787	2.531091726	0	thru slice 46	7
TF1911	07ug	10443	474.1248915	61.14871206	15.42305804	59	19.09863066	51.78920967	10	thru slice 46	7
TF1911	07ug	6603	315.3958532	31.11631077	11.12943779	28	20.26033621	18.02785503	10	thru slice 46	7
TF1911	07ug	6797	333.0702764	80.04766809	20.05571461	77	10.68118288	4.968205611	10	thru slice 46	7
TF1911	07ug	8341	394.9440153	86.82316269	22.0531736	88	5.564081045	5.0068418260000005	10	thru slice 46	7
TF1911	07ug	11213	447.0806154	32.675376799999995	12.51247102	30	4.034602693	4.933327997	0	thru slice 46	7
TF1911	07ug	9527	398.3481269	52.38396137	17.82916773	49	10.96788076	8.022879389	10	thru slice 46	7
TF1911	07ug	7356	366.17492769999996	89.76427406	28.540698699999997	92	1.48858075	3.559727164	0	thru slice 46	7
TF1911	07ug	10021	422.5833209	32.41732362	9.353272574	32	2.6614110369999997	4.4308860580000005	0	thru slice 46	7
TF1911	07ug	5871	307.96023080000003	39.05671947	13.61064891	38	6.605348322	6.186270891	10	thru slice 46	7
TF1911	07ug	6802	327.3953081	77.69508968	20.91039135	77	61.88282858	56.51681096	40	thru slice 46	7
TF1911	15ug	10400	406.299421	21.98817308	6.343726369	21	32.05413462	20.86234591	30	thru image 76	15
TF1911	15ug	13035	458.2226351	14.73617185	5.99250014	13	9.212121212000001	4.393633055	10	thru image 76	15
TF1911	15ug	9131	400.15383030000004	15.15146205	5.113964388	15	30.66454934	18.97181144	20	thru image 76	15
TF1911	15ug	8284	358.71134010000003	19.51038146	4.117320112	19	31.97259778	16.92274875	30	thru image 76	15
TF1911	15ug	7497	355.7948615	18.24636521	4.818669827	18	22.77190876	13.76098554	20	thru image 76	15
TF1911	15ug	9472	406.0237985	33.03631757	11.23394927	31	42.89674831	33.6519275	30	thru image 76	15
TF1911	15ug	10741	436.38264580000003	18.93836701	6.530840736	18	35.75663346	30.9511597	30	thru image 76	15
TF1911	15ug	7117	328.08791160000004	43.30040748	12.70274437	39	12.2031755	4.455359245	10	thru image 76	15
TF1911	15ug	8903	421.77829919999994	43.37515444	10.90284593	43	11.69830394	4.251708055	10	thru image 76	15
TF1911	15ug	9038	369.6990281	15.69451206	6.751927891	15	35.47200708	21.15260794	30	thru image 76	15
TF1911	15ug	9203	383.0416977	18.279148100000004	6.2234514910000005	17	33.68021297	30.23617797	20	thru image 76	15
TF1911	15ug	10611	419.9716598	22.63547262	6.489083185	21	10.28178306	5.185143977	10	thru image 76	15
TF1911	15ug	8453	382.2281814	22.20016562	6.848897505	21	10.06506566	4.530281637	10	thru image 76	15
TF1911	15ug	8728	400.6506654	19.31805683	5.656581535	19	22.98831347	16.26755359	20	thru image 76	15
TF1911	15ug	7647	345.4593963	20.81129855	6.466464161	19	39.07427749	29.76844505	30	thru image 76	15
TF1911	15ug	11028	453.5796563	35.73476605	12.69635903	34	24.35763511	15.32317288	20	thru image 76	15
TF1911	15ug	7330	358.9362776	19.08635744	5.3670606339999996	19	49.26821282	40.12839044	40	thru image 76	15
TF1911	15ug	8966	378.24004049999996	23.61164399	5.995143455	23	0.989292884	3.00816832	0	thru image 76	15
TF1911	15ug	9350	400.8620049	39.83304813	15.04823915	38	6.544385027000001	4.938915349	10	thru image 76	15
TF1911	15ug	7038	350.514991	42.77777778	13.93430681	43	7.520602444	4.598943238	10	thru image 76	15
TF1911	15ug	9373	396.4966644	16.00480102	5.455879606	15	16.84754081	12.34007009	10	thru image 76	15
TF1911	15ug	10596	450.02138539999993	23.861645899999996	6.623703433999999	23	18.71234428	13.16027179	20	thru image 76	15
TF1911	15ug	10390	400.485186	14.20991338	4.490234738	14	15.65794033	14.27652838	10	thru image 76	15
TF1911	15ug	7114	338.4247635	24.28310374	7.497090012	23	3.685690188	4.830330902	0	thru image 76	15
TF1911	15ug	12011	461.4152982	15.38772792	4.664080961	15	17.67130131	16.32986949	10	thru image 76	15
TF1911	15ug	8908	467.4589596	44.60035923	15.5355981	45	3.60350247	4.815299365	0	thru image 76	15
TF1911	15ug	11468	419.9809526000001	22.9165504	10.86833904	21	6.136205092000001	5.07805343	10	thru image 76	15
TF1911	15ug	7654	365.497731	46.8779723	14.51221803	46	7.158348576	4.788675193	10	thru image 76	15
TF1911	15ug	6900	309.2581961	25.09478261	6.535818025	25	30.42449275	25.33318106	30	thru image 76	15
TF1911	15ug	7653	360.0077518	30.56343917	8.594105998	30	16.470665099999998	4.916616059	20	thru image 76	15
TF1911	15ug	7753	378.44720889999996	15.99664646	2.321265958	16	10.11221463	3.848296724	10	thru image 76	15
TF1911	15ug	8580	349.54674950000003	18.93426573	3.821444968	19	41.25361305	19.65559667	30	thru image 76	15
TF1911	15ug	7241	350.4521001	41.93785389	13.12793	42	8.177047369	4.673556522	10	thru image 76	15
TF1911	15ug	7784	431.74116569999995	54.65107914	14.57766545	56	8.305498457999999	4.496340606	10	thru image 76	15
TF1911	15ug	7654	337.6303787	15.83890776	4.149253407	16	23.35066632	15.51500503	20	thru image 76	15
TF1911	15ug	10286	434.138288	29.01993	8.744417842	27	6.513707953	4.908314131	10	thru image 76	15
TF1911	15ug	7253	338.6521361	39.97104646	13.93960023	39	4.711154005	5.008540247	0	thru image 76	15
TF1911	15ug	8506	370.64860930000003	27.00822949	8.236362957999999	27	16.32012697	11.18733271	10	thru image 76	15
TF1911	15ug	8844	372.724221	24.45194482	7.752318885	23	39.65999548	41.11297174	20	thru image 76	15
TF1911	15ug	6288	300.78364060000007	11.07395038	2.611856251	11	34.08905852	23.73785887	30	thru image 76	15
TF1911	15ug	6725	307.0028391	25.08074349	8.137968132000001	24	26.666617100000003	18.41196296	20	thru image 76	15
TF1911	15ug	10506	412.3945168	34.4480297	13.26709515	32	11.76185037	6.302603661	10	thru image 76	15
TF1911	15ug	10555	439.9529418000001	31.73642823	9.462225265	31	14.36968262	9.121147331	10	thru image 76	15
TF1911	15ug	10464	409.9718535	30.97524847	7.561797962999999	31	8.231077982	5.0907585630000005	10	thru image 76	15
TF1911	15ug	11821	468.8162028	19.68242957	5.741895197000001	19	28.00143812	22.01676598	20	thru image 76	15
TF1911	15ug	13485	526.8400598000001	22.04545792	5.268630223	22	28.55802744	24.51590613	20	thru image 76	15
TF1911	15ug	6031	304.2103534	21.569723100000004	6.926245317999999	21	24.97977118	18.17233483	20	thru image 76	15
TF1911	15ug	7436	346.30909260000004	14.4486283	5.741827044	14	38.649273799999996	32.44965954	30	thru image 76	15
TF1911	15ug	5539	277.32422030000004	21.595233800000003	5.766281519	22	35.16356743	14.12979486	30	thru image 76	15
TF1911	15ug	7690	404.2459948	27.56827048	10.50662709	26	24.39817945	24.68764624	10	thru image 76	15
