# Supplementary material for: A single-parasite transcriptional atlas of Toxoplasma Gondii reveals novel control of antigen expression
Source: eLife journal article supplement (doi:10.7554/elife.54129), 2020-02-17
Supplement: supp [file elife-54129-supp-v1.zip › elife_poa_e54129_Figure_5_source_data_2.csv]

	index	Samples	Genes	Mean_Cq	Biological_group	-$\Delta\Delta$ Cq	Fold_change	Fold_change (log2)	Replicate
2	2	0a	207965	32.7199626076971	No transfection	-2.579122954983429	0.16734264458703518	-2.579122954983429	Experiment #1
3	3	0a	205210	30.504895937045102	No transfection	-2.707592322296513	0.1530853018827571	-2.707592322296513	Experiment #1
4	4	0a	222305	31.313591570845603	No transfection	-0.03749676876173069	0.9743440734607727	-0.037496768761730775	Experiment #1
6	6	0a	SRS22C	38.1899247316713	No transfection	-3.6732815354378694	0.07838483984157825	-3.6732815354378694	Experiment #1
7	7	0a	AP2 IX-1	32.209975096185396	No transfection	-0.73170997977277	0.6021897346655829	-0.7317099797727699	Experiment #1
9	9	0a	SAG1	20.8547541091599	No transfection	-5.242789683362393	0.026409674244739348	-5.242789683362393	Experiment #1
11	11	0a	bTUB	29.2928175318072	No transfection	-9.080885930738958	0.001846634510963732	-9.080885930738958	Experiment #1
14	14	0a	207965	46.59410052162371	No transfection	-16.45326086891004	1.1144868588120152e-05	-16.45326086891004	Experiment #1
15	15	0a	205210		No transfection				Experiment #1
16	16	0a	222305		No transfection				Experiment #1
18	18	0a	SRS22C		No transfection				Experiment #1
19	19	0a	AP2 IX-1	38.323547807417995	No transfection	-6.8452826910053695	0.008696902098146712	-6.8452826910053695	Experiment #1
21	21	0a	SAG1		No transfection				Experiment #1
23	23	0a	bTUB		No transfection				Experiment #1
26	26	0b	207965	31.2685742626121	No transfection	0.9652412067924665	1.9523899178668371	0.9652412067924666	Experiment #1
27	27	0b	205210	29.994991230331397	No transfection	-0.10471179889191262	0.9299907043816945	-0.10471179889191254	Experiment #1
28	28	0b	222305	31.1740735433252	No transfection	2.1949970754495673	4.57888736032181	2.1949970754495673	Experiment #1
30	30	0b	SRS22C	32.1212530557196	No transfection	4.488365957204724	22.445680909115765	4.488365957204724	Experiment #1
31	31	0b	AP2 IX-1	37.660033977775605	No transfection	-4.088793044672084	0.05876931754027653	-4.088793044672084	Experiment #1
33	33	0b	SAG1	21.509893011698498	No transfection	-3.8049527692100966	0.07154760231652958	-3.8049527692100966	Experiment #1
35	35	0b	bTUB	27.0880473580262	No transfection	-4.783139940267063	0.03631879279517389	-4.783139940267063	Experiment #1
38	38	0b	207965	38.6155069128381	No transfection	-6.381691443433535	0.011992768555479524	-6.381691443433535	Experiment #1
39	39	0b	205210		No transfection				Experiment #1
40	40	0b	222305	55.949987937850196	No transfection	-22.58091731907543	1.593920136887714e-07	-22.58091731907543	Experiment #1
42	42	0b	SRS22C	56.3084170021046	No transfection	-19.698797989180274	1.1750894488083575e-06	-19.698797989180274	Experiment #1
43	43	0b	AP2 IX-1	42.8258780637816	No transfection	-9.25463713067808	0.001637105338377482	-9.25463713067808	Experiment #1
45	45	0b	SAG1		No transfection				Experiment #1
47	47	0b	bTUB		No transfection				Experiment #1
50	50	1a	207965	28.315381742292498	Transfected	3.303194470751265	9.870987846898311	3.303194470751265	Experiment #1
51	51	1a	205210	24.480859408001102	Transfected	4.794180767077581	27.745478272894918	4.794180767077581	Experiment #1
52	52	1a	222305	28.1035232812827	Transfected	4.650308081131264	25.11205312779726	4.650308081131264	Experiment #1
54	54	1a	SRS22C	22.9691358919487	Transfected	13.025243864614822	8336.602688497152	13.025243864614822	Experiment #1
55	55	1a	AP2 IX-1	22.0916524353031	Transfected	10.86434924143962	1864.2107372550786	10.86434924143962	Experiment #1
57	57	1a	SAG1	21.625358251497698	Transfected	-4.535657265370098	0.04311527029310816	-4.535657265370098	Experiment #1
59	59	1a	bTUB	26.098958601925002	Transfected	-4.409290440526668	0.04706210167885359	-4.409290440526668	Experiment #1
62	62	1a	207965	58.30781266779329	Transfected	-26.689236454749526	9.241431861733394e-09	-26.689236454749526	Experiment #1
63	63	1a	205210		Transfected				Experiment #1
64	64	1a	222305		Transfected				Experiment #1
66	66	1a	SRS22C		Transfected				Experiment #1
67	67	1a	AP2 IX-1	41.4673860925114	Transfected	-8.511384415768678	0.0027404254128982866	-8.511384415768678	Experiment #1
69	69	1a	SAG1		Transfected				Experiment #1
71	71	1a	bTUB		Transfected				Experiment #1
74	74	1b	207965	29.913367616029397	Transfected	1.1747725878811721	2.257572920188401	1.1747725878811721	Experiment #1
75	75	1b	205210	26.0789062861837	Transfected	2.6656978797617903	6.345341804300324	2.6656978797617903	Experiment #1
76	76	1b	222305	29.915593417786198	Transfected	2.307801935494574	4.95128136589606	2.307801935494574	Experiment #1
78	78	1b	SRS22C	24.171666015317804	Transfected	11.292277732112524	2507.9236836261275	11.292277732112524	Experiment #1
79	79	1b	AP2 IX-1	23.695467515707396	Transfected	8.73009815190213	424.6404963444518	8.73009815190213	Experiment #1
81	81	1b	SAG1	18.543504151924697	Transfected	-1.9842391749302912	0.2527461156217675	-1.9842391749302914	Experiment #1
83	83	1b	bTUB	24.694003100101	Transfected	-3.5347709478358595	0.0862835324655484	-3.5347709478358595	Experiment #1
86	86	1b	207965		Transfected				Experiment #1
87	87	1b	205210		Transfected				Experiment #1
88	88	1b	222305		Transfected				Experiment #1
90	90	1b	SRS22C		Transfected				Experiment #1
91	91	1b	AP2 IX-1	35.115639320953	Transfected	-2.6900736533434753	0.15495555140550873	-2.6900736533434753	Experiment #1
93	93	1b	SAG1	31.2769815397197	Transfected	-14.717716562725293	3.7112981654381466e-05	-14.717716562725293	Experiment #1
95	95	1b	bTUB		Transfected				Experiment #1
98	98	1c	207965	27.803855903084997	Transfected	2.55867686680757	5.891670985714135	2.55867686680757	Experiment #1
99	99	1c	205210	24.5843746537142	Transfected	3.4346220782132875	10.81245391229794	3.4346220782132875	Experiment #1
100	100	1c	222305	28.4214211504148	Transfected	3.0763667688479686	8.434875468243904	3.0763667688479686	Experiment #1
102	102	1c	SRS22C	22.7757461246421	Transfected	11.962590188770225	3991.153881923777	11.962590188770225	Experiment #1
103	103	1c	AP2 IX-1	22.251498153168	Transfected	9.448460080423523	698.6664630793769	9.448460080423523	Experiment #1
105	105	1c	SAG1	15.0707772236622	Transfected	0.7628803193142044	1.6968750310479739	0.7628803193142044	Experiment #1
107	107	1c	bTUB	24.9626701382913	Transfected	-4.529045420044163	0.04331332028156905	-4.529045420044163	Experiment #1
110	110	1c	207965	34.184027151673796	Transfected	-3.8214943817812284	0.07073193885448127	-3.8214943817812284	Experiment #1
111	111	1c	205210	30.7075693086902	Transfected	-2.688572576762713	0.15511686144751102	-2.688572576762713	Experiment #1
112	112	1c	222305		Transfected				Experiment #1
114	114	1c	SRS22C		Transfected				Experiment #1
115	115	1c	AP2 IX-1	45.861171536696	Transfected	-14.161213303104475	5.458207235075068e-05	-14.161213303104475	Experiment #1
117	117	1c	SAG1	30.007950212733697	Transfected	-14.174292669757293	5.4089471630212555e-05	-14.174292669757293	Experiment #1
119	119	1c	bTUB		Transfected				Experiment #1
122	122	1d	207965	29.1212185140348	Transfected	5.795762928546665	55.55184523668151	5.795762928546665	Experiment #1
123	123	1d	205210	25.9383261867523	Transfected	6.635119217864087	99.39622932050092	6.635119217864087	Experiment #1
124	124	1d	222305	31.172323517621603	Transfected	4.879913074330066	29.444230684427787	4.879913074330066	Experiment #1
126	126	1d	SRS22C	24.787225677652998	Transfected	14.505559308448227	23259.932802499097	14.505559308448227	Experiment #1
127	127	1d	AP2 IX-1	23.417807884628502	Transfected	12.83659902165192	7314.781331455351	12.83659902165192	Experiment #1
129	129	1d	SAG1	21.5077457705269	Transfected	-1.119639554861596	0.4602087902192618	-1.119639554861596	Experiment #1
131	131	1d	bTUB	28.760382235689896	Transfected	-3.7723088447538586	0.07318496758664478	-3.7723088447538586	Experiment #1
134	134	1d	207965		Transfected				Experiment #1
135	135	1d	205210		Transfected				Experiment #1
136	136	1d	222305		Transfected				Experiment #1
138	138	1d	SRS22C	52.81763638765389	Transfected	-13.524851401552667	8.484261411247987e-05	-13.524851401552667	Experiment #1
139	139	1d	AP2 IX-1	42.1963272225626	Transfected	-5.941920316282179	0.016266860899118534	-5.941920316282179	Experiment #1
141	141	1d	SAG1		Transfected				Experiment #1
143	143	1d	bTUB	32.2594193896897	Transfected	-7.2713459987536595	0.006473016969035922	-7.2713459987536595	Experiment #1
146	146	1e	207965	30.2290839585218	Transfected	4.449658452955468	21.851470326774056	4.449658452955468	Experiment #1
147	147	1e	205210	28.052420259338497	Transfected	4.2827861141736925	19.464671801812774	4.2827861141736925	Experiment #1
148	148	1e	222305	32.5688726947171	Transfected	3.2451248661303715	9.4815627670258	3.2451248661303715	Experiment #1
150	150	1e	SRS22C	26.0088211249188	Transfected	13.045724830078228	8455.795847392099	13.045724830078228	Experiment #1
151	151	1e	AP2 IX-1	26.703592454301894	Transfected	9.312575420874332	635.864440485422	9.312575420874332	Experiment #1
153	153	1e	SAG1	24.158224870805398	Transfected	-4.008357686244292	0.062138977564384086	-4.008357686244292	Experiment #1
155	155	1e	bTUB	29.2768928397684	Transfected	-4.52705847993656	0.04337301429965792	-4.52705847993656	Experiment #1
158	158	1e	207965	47.0938284346306	Transfected	-12.415086023153332	0.00018309931025003016	-12.415086023153332	Experiment #1
159	159	1e	205210		Transfected				Experiment #1
160	160	1e	222305		Transfected				Experiment #1
162	162	1e	SRS22C		Transfected				Experiment #1
163	163	1e	AP2 IX-1	41.9191979809804	Transfected	-5.903030105804174	0.01671132451677132	-5.903030105804174	Experiment #1
165	165	1e	SAG1		Transfected				Experiment #1
167	167	1e	bTUB		Transfected				Experiment #1
170	170	1f	207965	29.6419182678925	Transfected	3.436912672389866	10.829634685188779	3.436912672389866	Experiment #1
171	171	1f	205210	25.142350312864103	Transfected	5.592944589453182	48.266308622191524	5.592944589453182	Experiment #1
172	172	1f	222305	28.163439873086	Transfected	6.0506462165665695	66.28663980035468	6.0506462165665695	Experiment #1
174	174	1f	SRS22C	24.0904358979267	Transfected	13.364198585875425	10544.467251901666	13.364198585875425	Experiment #1
175	175	1f	AP2 IX-1	22.566168376090804	Transfected	11.850088027890518	3691.747144674627	11.850088027890518	Experiment #1
177	177	1f	SAG1	22.3447882733433	Transfected	-3.794832559977099	0.0720512585005164	-3.794832559977099	Experiment #1
179	179	1f	bTUB	24.011049641862602	Transfected	-0.8611267532256655	0.5505224287717093	-0.8611267532256655	Experiment #1
182	182	1f	207965		Transfected				Experiment #1
183	183	1f	205210		Transfected				Experiment #1
184	184	1f	222305		Transfected				Experiment #1
186	186	1f	SRS22C		Transfected				Experiment #1
187	187	1f	AP2 IX-1	39.8928270801558	Transfected	-5.476570676174475	0.02245887267878381	-5.476570676174475	Experiment #1
189	189	1f	SAG1		Transfected				Experiment #1
191	191	1f	bTUB		Transfected				Experiment #1
194	194	0a	207965	32.8732567610734	No transfection	-2.73241710835973	0.15047366179791818	-2.73241710835973	Experiment #1
195	195	0a	205210		No transfection				Experiment #1
196	196	0a	222305		No transfection				Experiment #1
198	198	0a	SRS22C	41.2898983646176	No transfection	-6.773255168384171	0.009142122283240938	-6.773255168384171	Experiment #1
199	199	0a	AP2 IX-1	36.143383972291495	No transfection	-4.66511885587887	0.03941479671926941	-4.66511885587887	Experiment #1
201	201	0a	SAG1	17.4071064404339	No transfection	-1.7951420146363937	0.288143221336446	-1.7951420146363937	Experiment #1
203	203	0a	bTUB	22.315679796398896	No transfection	-2.103748195330656	0.23265301760405957	-2.103748195330656	Experiment #1
206	206	0a	207965	33.3927816739818	No transfection	-3.251942021268132	0.10497065507236919	-3.251942021268132	Experiment #1
207	207	0a	205210	42.240726870168096	No transfection	-14.443423255419507	4.488449673548821e-05	-14.443423255419507	Experiment #1
208	208	0a	222305		No transfection				Experiment #1
210	210	0a	SRS22C	45.8695474644176	No transfection	-11.352904268184172	0.00038232727142681637	-11.352904268184172	Experiment #1
211	211	0a	AP2 IX-1	34.4909431337338	No transfection	-3.012678017321175	0.12390634591237316	-3.012678017321175	Experiment #1
213	213	0a	SAG1	23.3669483655623	No transfection	-7.754983939764795	0.0046293201702900365	-7.754983939764795	Experiment #1
215	215	0a	bTUB		No transfection				Experiment #1
218	218	0b	207965	33.0610169765654	No transfection	-0.827201507160833	0.5636214772405799	-0.827201507160833	Experiment #1
219	219	0b	205210	30.685507105377997	No transfection	-0.7952276739385127	0.5762522269671193	-0.7952276739385128	Experiment #1
220	220	0b	222305	30.626553661048003	No transfection	2.742516957726764	6.692368831456161	2.742516957726764	Experiment #1
222	222	0b	SRS22C	32.0347172383539	No transfection	4.574901774570424	23.83321667780164	4.574901774570424	Experiment #1
223	223	0b	AP2 IX-1	34.752452263611396	No transfection	-1.1812113305078746	0.44098108157120036	-1.1812113305078746	Experiment #1
225	225	0b	SAG1	16.5839636185816	No transfection	1.1209766239068024	2.1749415406875046	1.1209766239068022	Experiment #1
227	227	0b	bTUB	21.4485653429443	No transfection	0.8563420748148367	1.8104421455445028	0.8563420748148366	Experiment #1
230	230	0b	207965	31.196284755125	No transfection	1.0375307142795656	2.0527112685456403	1.0375307142795656	Experiment #1
231	231	0b	205210	29.682126461949895	No transfection	0.20815296948958917	1.1552082652204083	0.20815296948958928	Experiment #1
232	232	0b	222305	31.4379968284799	No transfection	1.9310737902948674	3.813389221622745	1.9310737902948674	Experiment #1
234	234	0b	SRS22C	29.5731658603308	No transfection	7.036453152593523	131.27543377774228	7.036453152593523	Experiment #1
235	235	0b	AP2 IX-1	34.014673866311	No transfection	-0.4434329332074789	0.7353826614541363	-0.4434329332074789	Experiment #1
237	237	0b	SAG1	22.8951964467043	No transfection	-5.190256204215899	0.027389064411134725	-5.190256204215899	Experiment #1
239	239	0b	bTUB		No transfection				Experiment #1
242	242	1a	207965	28.372747742028498	Transfected	3.2458284710152654	9.486188069498343	3.2458284710152654	Experiment #1
243	243	1a	205210	24.9187637736808	Transfected	4.356276401397881	20.48188230493944	4.356276401397881	Experiment #1
244	244	1a	222305	27.2685616047696	Transfected	5.485269757644364	44.79512278650571	5.485269757644364	Experiment #1
246	246	1a	SRS22C	23.2876513187779	Transfected	12.706728437785621	6685.076886338091	12.706728437785621	Experiment #1
247	247	1a	AP2 IX-1	22.901458273623	Transfected	10.05454340311972	1063.4550968403764	10.05454340311972	Experiment #1
249	249	1a	SAG1	14.2300964556446	Transfected	2.859604530482999	7.258163372377381	2.859604530482999	Experiment #1
251	251	1a	bTUB	18.633396459777	Transfected	3.056271701621334	8.318201894311457	3.056271701621334	Experiment #1
254	254	1a	207965	30.1991765710714	Transfected	1.4193996419723618	2.674741820317698	1.4193996419723618	Experiment #1
255	255	1a	205210	25.2273373842571	Transfected	4.047702790821582	16.53788446432521	4.047702790821582	Experiment #1
256	256	1a	222305	29.568225625906102	Transfected	3.1856057365078634	9.09835506081982	3.1856057365078634	Experiment #1
258	258	1a	SRS22C	22.3969256428509	Transfected	13.597454113712622	12394.857919951754	13.597454113712622	Experiment #1
259	259	1a	AP2 IX-1	28.634722621533104	Transfected	4.321279055209615	19.991004423162835	4.321279055209615	Experiment #1
261	261	1a	SAG1	20.134280662086198	Transfected	-3.044579675958598	0.12119653214990547	-3.044579675958598	Experiment #1
263	263	1a	bTUB	25.5864532373418	Transfected	-3.896785075943466	0.06713528014280012	-3.896785075943466	Experiment #1
266	266	1b	207965	30.2484005148831	Transfected	0.8397396890274678	1.78972718541381	0.8397396890274678	Experiment #1
267	267	1b	205210	26.682890436098297	Transfected	2.0617137298471917	4.1748192291795565	2.0617137298471917	Experiment #1
268	268	1b	222305	30.042607268625304	Transfected	2.180788084655468	4.534011607926855	2.180788084655468	Experiment #1
270	270	1b	SRS22C	25.141919612579102	Transfected	10.322024134851226	1280.0852122188717	10.322024134851226	Experiment #1
271	271	1b	AP2 IX-1	24.524785999882198	Transfected	7.900779667727328	238.9855645919488	7.900779667727328	Experiment #1
273	273	1b	SAG1	15.805728370724498	Transfected	0.7535366062699076	1.685920615724423	0.7535366062699076	Experiment #1
275	275	1b	bTUB	20.6213741820334	Transfected	0.537857970231741	1.4518153452285014	0.537857970231741	Experiment #1
278	278	1b	207965	31.105609247767802	Transfected	-0.01746904385723269	0.9879643958262421	-0.017469043857232722	Experiment #1
279	279	1b	205210	27.104685349712	Transfected	1.6399188162334895	3.116482942048104	1.6399188162334895	Experiment #1
280	280	1b	222305	29.580453069205603	Transfected	2.6429422840751684	6.246042059009682	2.6429422840751684	Experiment #1
282	282	1b	SRS22C	24.584121795768798	Transfected	10.87982195166153	1884.3117442377354	10.87982195166153	Experiment #1
283	283	1b	AP2 IX-1	31.1913862228512	Transfected	1.2341794447583254	2.352475087067224	1.2341794447583254	Experiment #1
285	285	1b	SAG1	21.532266035767304	Transfected	-4.973001058772898	0.03184032652711168	-4.973001058772898	Experiment #1
287	287	1b	bTUB	27.6868207182344	Transfected	-6.5275885659692605	0.010839270195700771	-6.5275885659692605	Experiment #1
290	290	1c	207965	28.8392357566745	Transfected	1.523297013218066	2.874472070879344	1.523297013218066	Experiment #1
291	291	1c	205210	25.0051789627312	Transfected	3.0138177691962866	8.076990089363205	3.0138177691962866	Experiment #1
292	292	1c	222305	28.8898669801549	Transfected	2.6079209391078706	6.096245232879089	2.6079209391078706	Experiment #1
294	294	1c	SRS22C	23.4663392492223	Transfected	11.271997064190025	2472.915219104338	11.271997064190025	Experiment #1
295	295	1c	AP2 IX-1	23.056221440629997	Transfected	8.643736792961526	399.9668975440168	8.643736792961526	Experiment #1
297	297	1c	SAG1	14.5301573003541	Transfected	1.3035002426223041	2.468270043563345	1.3035002426223041	Experiment #1
299	299	1c	bTUB	19.0727914016304	Transfected	1.3608333166167377	2.56833486539846	1.3608333166167377	Experiment #1
302	302	1c	207965	29.803338062059	Transfected	0.5591947078335657	1.4734465304890914	0.5591947078335657	Experiment #1
303	303	1c	205210	25.311031071762198	Transfected	2.7079656601652893	6.533996401190376	2.7079656601652893	Experiment #1
304	304	1c	222305	29.241701596940104	Transfected	2.256086322322666	4.7769385634457775	2.256086322322666	Experiment #1
306	306	1c	SRS22C	23.3198650166613	Transfected	11.418471296751026	2737.173740987427	11.418471296751026	Experiment #1
307	307	1c	AP2 IX-1	22.7344799475264	Transfected	8.965478286065125	499.89396021365644	8.965478286065125	Experiment #1
309	309	1c	SAG1	18.546111167678	Transfected	-2.7124536247015953	0.15257033405169587	-2.7124536247015953	Experiment #1
311	311	1c	bTUB	24.1084847611901	Transfected	-3.67486004294296	0.07829912290922385	-3.67486004294296	Experiment #1
314	314	1d	207965	29.2079237695275	Transfected	5.709057673053966	52.31155218360239	5.709057673053966	Experiment #1
315	315	1d	205210	26.7775365858243	Transfected	5.7959088187920855	55.557463112875155	5.7959088187920855	Experiment #1
316	316	1d	222305	55.5041402086666	Transfected	-19.45190361671493	1.3944197926596233e-06	-19.45190361671493	Experiment #1
318	318	1d	SRS22C	24.7789750606877	Transfected	14.513809925413526	23393.33493610982	14.513809925413526	Experiment #1
319	319	1d	AP2 IX-1	24.347354949977497	Transfected	11.907051956302926	3840.429515387359	11.907051956302926	Experiment #1
321	321	1d	SAG1	15.484646106777802	Transfected	4.903460108887501	29.928749778148422	4.903460108887501	Experiment #1
323	323	1d	bTUB	20.227253560426	Transfected	4.760819830510037	27.111251945970473	4.760819830510037	Experiment #1
326	326	1d	207965	30.7514921927	Transfected	4.1654892498814675	17.94474167655941	4.1654892498814675	Experiment #1
327	327	1d	205210	26.943587890599197	Transfected	5.629857514017189	49.51718904820718	5.629857514017189	Experiment #1
328	328	1d	222305	32.3006987268359	Transfected	3.751537865115772	13.468692174266364	3.751537865115772	Experiment #1
330	330	1d	SRS22C	24.450044220218	Transfected	14.842740765883224	29383.950815768432	14.842740765883224	Experiment #1
331	331	1d	AP2 IX-1	24.3536914572687	Transfected	11.900715449011724	3823.5988297455397	11.900715449011724	Experiment #1
333	333	1d	SAG1	20.809354017616197	Transfected	-0.4212478019508943	0.7467784484659625	-0.4212478019508942	Experiment #1
335	335	1d	bTUB	27.1597248216022	Transfected	-2.171651430666163	0.22195645470545178	-2.171651430666163	Experiment #1
338	338	1e	207965	31.031763601651395	Transfected	3.6469788098258746	12.527084742067043	3.6469788098258746	Experiment #1
339	339	1e	205210	28.8239397603201	Transfected	3.511266613192088	11.40240790836166	3.511266613192088	Experiment #1
340	340	1e	222305	31.3359482088379	Transfected	4.47804935200957	22.2857460330629	4.47804935200957	Experiment #1
342	342	1e	SRS22C	26.7685004574755	Transfected	12.286045497521528	4994.226363166733	12.286045497521528	Experiment #1
343	343	1e	AP2 IX-1	25.4448031742023	Transfected	10.571364700973927	1521.5907872874845	10.571364700973927	Experiment #1
345	345	1e	SAG1	17.104256059307698	Transfected	3.0456111252534086	8.25696234086761	3.0456111252534086	Experiment #1
347	347	1e	bTUB	22.1732595982266	Transfected	2.57657476160524	5.965217583061932	2.57657476160524	Experiment #1
350	350	1e	207965	34.175397069382804	Transfected	0.503345342094466	1.417496666187074	0.503345342094466	Experiment #1
351	351	1e	205210	28.4389403862288	Transfected	3.896265987283389	14.889939503559393	3.896265987283389	Experiment #1
352	352	1e	222305	31.318670622688604	Transfected	4.495326938158868	22.55424266136782	4.495326938158868	Experiment #1
354	354	1e	SRS22C		Transfected				Experiment #1
355	355	1e	AP2 IX-1	54.3176989733234	Transfected	-18.301531098147176	3.095210378065864e-06	-18.301531098147176	Experiment #1
357	357	1e	SAG1	24.9727921226755	Transfected	-4.822924938114394	0.035330918404858865	-4.822924938114394	Experiment #1
359	359	1e	bTUB	27.874758493405498	Transfected	-3.124924133573657	0.11463153332462367	-3.124924133573657	Experiment #1
362	362	1f	207965	29.204439123057398	Transfected	3.874391817224968	14.665880836629455	3.874391817224968	Experiment #1
363	363	1f	205210	26.0323440705928	Transfected	4.702950831724486	26.045294261320695	4.702950831724486	Experiment #1
364	364	1f	222305	28.0101620634522	Transfected	6.203924026200369	73.71692699920538	6.203924026200369	Experiment #1
366	366	1f	SRS22C	23.953162643575503	Transfected	13.501471840226621	11597.06281538876	13.501471840226621	Experiment #1
367	367	1f	AP2 IX-1	23.0522608858117	Transfected	11.36399551816962	2635.7457903365143	11.36399551816962	Experiment #1
369	369	1f	SAG1	14.6842229075822	Transfected	3.8657328057840026	14.578120300590493	3.8657328057840026	Experiment #1
371	371	1f	bTUB	19.438270159816803	Transfected	3.711652728820134	13.10143313968479	3.711652728820134	Experiment #1
374	374	1f	207965	29.5741261834269	Transfected	3.5047047568554675	11.350663733151888	3.5047047568554675	Experiment #1
375	375	1f	205210	25.488294413612103	Transfected	5.247000488705183	37.97559038903377	5.247000488705183	Experiment #1
376	376	1f	222305	28.231514363058	Transfected	5.982571726594568	63.23150822522952	5.982571726594568	Experiment #1
378	378	1f	SRS22C	24.183011893139803	Transfected	13.271622590662322	9889.093677984181	13.271622590662322	Experiment #1
379	379	1f	AP2 IX-1	23.695958109268602	Transfected	10.72029829471272	1687.0631880985723	10.72029829471272	Experiment #1
381	381	1f	SAG1	18.0575447757209	Transfected	0.4924109376453032	1.406793854390785	0.49241093764530314	Experiment #1
383	383	1f	bTUB	24.584660316898304	Transfected	-1.4347374282613679	0.3699141958879032	-1.4347374282613679	Experiment #1
410	26	0a	207965	32.916217178746	No transfection	0.26559253744493105	1.202129681633486	0.26559253744493116	Experiment #2
411	27	0a	205210		No transfection				Experiment #2
412	28	0a	222305	54.4475041763865	No transfection	-17.911658954531063	4.055583827854695e-06	-17.911658954531063	Experiment #2
414	30	0a	SRS22C	44.320986401992705	No transfection	-5.277814151621534	0.025776243683117053	-5.277814151621534	Experiment #2
415	31	0a	AP2 IX-1	40.9276537189442	No transfection	-5.644875118296888	0.01998587963831616	-5.644875118296888	Experiment #2
417	33	0a	SAG1	18.8521454283054	No transfection	-0.08744470534110249	0.9411883020549345	-0.08744470534110255	Experiment #2
419	35	0a	bTUB	23.346158164137396	No transfection	-0.10631863973963007	0.9289554785484456	-0.10631863973963011	Experiment #2
422	38	0a	207965	33.0654372266497	No transfection	0.11637248954123436	1.0840058102586	0.11637248954123446	Experiment #2
423	39	0a	205210	29.985196605179997	No transfection	0.2527190076845258	1.19145049431522	0.2527190076845257	Experiment #2
424	40	0a	222305		No transfection				Experiment #2
426	42	0a	SRS22C	49.3342858887921	No transfection	-10.291113638420931	0.0007981161631163402	-10.291113638420931	Experiment #2
427	43	0a	AP2 IX-1	38.943340345447204	No transfection	-3.6605617447998924	0.0790789899971708	-3.6605617447998924	Experiment #2
429	45	0a	SAG1	19.0013420992122	No transfection	-0.2366413762479027	0.8487188492052591	-0.23664137624790277	Experiment #2
431	47	0a	bTUB	23.2420824471374	No transfection	-0.002242922739633002	0.9984465323088425	-0.002242922739633065	Experiment #2
434	50	0b	207965	32.7422146234881	No transfection	-0.6796838402039675	0.6243020723079198	-0.6796838402039675	Experiment #2
435	51	0b	205210	29.157866737268897	No transfection	-0.03923005731117257	0.9731741759495784	-0.03923005731117251	Experiment #2
436	52	0b	222305	31.7998804836893	No transfection	3.6166858052593405	12.266789485808438	3.6166858052593405	Experiment #2
438	54	0b	SRS22C	30.571046878709698	No transfection	7.352846438754675	163.4659608451388	7.352846438754675	Experiment #2
439	55	0b	AP2 IX-1	31.1204858996244	No transfection	3.043013768116115	8.242110285770767	3.043013768116115	Experiment #2
441	57	0b	SAG1	17.811938007645	No transfection	-0.16651621758750323	0.890991628892106	-0.16651621758750326	Experiment #2
443	59	0b	bTUB	22.196299274682	No transfection	-0.07573868319103383	0.9488561668513938	-0.07573868319103379	Experiment #2
446	62	0b	207965	32.7932756254606	No transfection	-0.7307448421764668	0.6025927237830658	-0.7307448421764667	Experiment #2
447	63	0b	205210	29.2488272123552	No transfection	-0.13019053239747436	0.9137107712256733	-0.13019053239747433	Experiment #2
448	64	0b	222305		No transfection				Experiment #2
450	66	0b	SRS22C	32.271293894912894	No transfection	5.652599422551479	50.30393741027245	5.652599422551479	Experiment #2
451	67	0b	AP2 IX-1	30.449501565498398	No transfection	3.7139981022421154	13.12274931713683	3.7139981022421154	Experiment #2
453	69	0b	SAG1	17.7415206776793	No transfection	-0.09609888762180319	0.9355593689551169	-0.09609888762180326	Experiment #2
455	71	0b	bTUB	22.449902349039196	No transfection	-0.32934175754822803	0.7958995371724432	-0.32934175754822803	Experiment #2
458	74	1a	207965	32.095311658969	Transfected	1.6575896766316376	3.1548899393955367	1.6575896766316376	Experiment #2
459	75	1a	205210	29.513678768810397	Transfected	1.2953284634638322	2.4543286765606185	1.2953284634638322	Experiment #2
460	76	1a	222305		Transfected				Experiment #2
462	78	1a	SRS22C	26.326448861030396	Transfected	13.287815008750481	10000.71139671645	13.287815008750481	Experiment #2
463	79	1a	AP2 IX-1	27.587630605344803	Transfected	8.266239614712216	307.8832592671309	8.266239614712216	Experiment #2
465	81	1a	SAG1	19.615484182365	Transfected	-0.2796918399909991	0.8237669552972104	-0.27969183999099917	Experiment #2
467	83	1a	bTUB	24.2486937056703	Transfected	-0.4377625618628258	0.7382786984379667	-0.4377625618628258	Experiment #2
470	86	1a	207965	30.714617175180503	Transfected	3.0382841604201367	8.21513430029506	3.0382841604201367	Experiment #2
471	87	1a	205210	28.8093043074552	Transfected	1.9997029248190294	3.99917641750124	1.9997029248190294	Experiment #2
472	88	1a	222305	32.613069944043495	Transfected	4.4938668972216504	22.531428789234113	4.4938668972216504	Experiment #2
474	90	1a	SRS22C	26.612374521059	Transfected	13.001889348721878	8202.735244377565	13.001889348721878	Experiment #2
475	91	1a	AP2 IX-1	27.2124798851966	Transfected	8.641390334860418	399.3169037878424	8.641390334860418	Experiment #2
477	93	1a	SAG1	19.4890009478285	Transfected	-0.15320860545449833	0.8992482765873153	-0.15320860545449835	Experiment #2
479	95	1a	bTUB	24.132923686736003	Transfected	-0.3219925429285304	0.7999642632157997	-0.32199254292853047	Experiment #2
482	98	1b	207965	32.1870245148533	Transfected	1.330387170560435	2.514701519343367	1.330387170560435	Experiment #2
483	99	1b	205210	29.2281028059654	Transfected	1.345414776121924	2.5410324091741137	1.345414776121924	Experiment #2
484	100	1b	222305	33.5841787361267	Transfected	3.287268454951537	9.762620529813766	3.287268454951537	Experiment #2
486	102	1b	SRS22C	26.271040402607102	Transfected	13.107733816986869	8827.161127361253	13.107733816986869	Experiment #2
487	103	1b	AP2 IX-1	26.4539830339563	Transfected	9.164397535913814	573.797366265138	9.164397535913814	Experiment #2
489	105	1b	SAG1	19.4180688388177	Transfected	-0.31776614663060343	0.8023112062902616	-0.31776614663060354	Experiment #2
491	107	1b	bTUB	23.6234146581176	Transfected	-0.047973164497033594	0.9672943220430277	-0.04797316449703368	Experiment #2
494	110	1b	207965	30.2954076665132	Transfected	3.2220040189005346	9.33082095104218	3.2220040189005346	Experiment #2
495	111	1b	205210	28.5670286118028	Transfected	2.006488970284522	4.018031767175308	2.006488970284522	Experiment #2
496	112	1b	222305		Transfected				Experiment #2
498	114	1b	SRS22C	26.3683636887468	Transfected	13.010410530847171	8251.327515751631	13.010410530847171	Experiment #2
499	115	1b	AP2 IX-1	27.090262649573496	Transfected	8.528117920296616	369.1639638911665	8.528117920296616	Experiment #2
501	117	1b	SAG1	19.3648098631684	Transfected	-0.26450717098130383	0.83248306489445	-0.2645071709813038	Experiment #2
503	119	1b	bTUB	23.7451907881637	Transfected	-0.16974929454313425	0.8889971539187234	-0.16974929454313417	Experiment #2
506	122	1c	207965	30.347579613036498	Transfected	2.861766456790537	7.2690481241586475	2.861766456790537	Experiment #2
507	123	1c	205210	28.3199654060511	Transfected	1.945486560449524	3.8516765621295512	1.945486560449524	Experiment #2
508	124	1c	222305	33.255895780475996	Transfected	3.3074857950155447	9.900393002324183	3.3074857950155447	Experiment #2
510	126	1c	SRS22C	25.5420672852277	Transfected	13.528641318779574	11817.533375638646	13.528641318779574	Experiment #2
511	127	1c	AP2 IX-1	26.5577631126391	Transfected	8.752551841644312	431.3011766254049	8.752551841644312	Experiment #2
513	129	1c	SAG1	19.204764601226103	Transfected	-0.4125275246257054	0.751305972114454	-0.41252752462570547	Experiment #2
515	131	1c	bTUB	23.423676258326896	Transfected	-0.15630038029302895	0.8973232015685202	-0.15630038029302903	Experiment #2
518	134	1c	207965	30.0670155471698	Transfected	3.142330522657236	8.829492532862167	3.142330522657236	Experiment #2
519	135	1c	205210	28.2864329379629	Transfected	1.9790190285377243	3.942249344016933	1.9790190285377243	Experiment #2
520	136	1c	222305		Transfected				Experiment #2
522	138	1c	SRS22C	25.7159260200629	Transfected	13.354782583944374	10475.871035204893	13.354782583944374	Experiment #2
523	139	1c	AP2 IX-1	26.073147239710604	Transfected	9.23716771457281	603.4823280756119	9.23716771457281	Experiment #2
525	141	1c	SAG1	19.2803643039579	Transfected	-0.48812722735750214	0.7129499827869724	-0.4881272273575021	Experiment #2
527	143	1c	bTUB	23.4581490198911	Transfected	-0.19077314185723182	0.8761360732007293	-0.19077314185723176	Experiment #2
554	170	0a	207965	32.367156015728504	No transfection	0.8146537004624292	1.7588759066685948	0.8146537004624292	Experiment #2
555	171	0a	205210	31.269811610897698	No transfection	-1.0318959980331748	0.48906699164192063	-1.0318959980331748	Experiment #2
556	172	0a	222305	32.5279474972884	No transfection	4.007897724567037	16.087828748751203	4.007897724567037	Experiment #2
558	174	0a	SRS22C	48.237261498409794	No transfection	-9.194089248038622	0.0017072744992621036	-9.194089248038622	Experiment #2
559	175	0a	AP2 IX-1	32.4240886618532	No transfection	2.8586899387941145	7.2535635421961	2.8586899387941145	Experiment #2
561	177	0a	SAG1	18.7645718466045	No transfection	0.0001288763597955267	1.000089334275502	0.0001288763597956629	Experiment #2
563	179	0a	bTUB	23.185451444032896	No transfection	0.05438808036486975	1.0384185642588126	0.054388080364869765	Experiment #2
566	182	0a	207965	32.1787246929351	No transfection	1.003085023255835	2.004281326252952	1.003085023255835	Experiment #2
567	183	0a	205210	29.727054011676604	No transfection	0.5108616011879192	1.424900915783723	0.5108616011879192	Experiment #2
568	184	0a	222305	32.4281027524409	No transfection	4.107742469414539	17.240652475757308	4.107742469414539	Experiment #2
570	186	0a	SRS22C	39.2585090687275	No transfection	-0.21533681835632734	0.8613450425792192	-0.21533681835632743	Experiment #2
571	187	0a	AP2 IX-1	35.648364488919796	No transfection	-0.3655858882724843	0.7761536097276749	-0.3655858882724842	Experiment #2
573	189	0a	SAG1	18.7182226566211	No transfection	0.04647806634319451	1.0327406984229919	0.04647806634319444	Experiment #2
575	191	0a	bTUB	23.178417664286197	No transfection	0.061421860111568805	1.0434936781058426	0.06142186011156893	Experiment #2
578	194	0b	207965	33.465693295067396	No transfection	-1.4031625117832611	0.3780994060716366	-1.4031625117832611	Experiment #2
579	195	0b	205210	28.9873680857088	No transfection	0.131268594248926	1.0952563615457314	0.13126859424892612	Experiment #2
580	196	0b	222305	32.532752825774004	No transfection	2.8838134631746364	7.380985536740923	2.8838134631746364	Experiment #2
582	198	0b	SRS22C	32.2582812666767	No transfection	5.665612050787676	50.759714541980514	5.665612050787676	Experiment #2
583	199	0b	AP2 IX-1	32.181093106253	No transfection	1.9824065614875117	3.9515168537987364	1.9824065614875117	Experiment #2
585	201	0b	SAG1	17.6763329820317	No transfection	-0.030911191974201557	0.978801900683603	-0.030911191974201623	Experiment #2
587	203	0b	bTUB	22.2200369328185	No transfection	-0.0994763413275308	0.9333717183551028	-0.09947634132753083	Experiment #2
590	206	0b	207965	32.1504877241567	No transfection	-0.08795694087256223	0.9408541881231142	-0.08795694087256217	Experiment #2
591	207	0b	205210	29.985922598081004	No transfection	-0.8672859181232795	0.5481771439500985	-0.8672859181232795	Experiment #2
592	208	0b	222305	32.647430085082	No transfection	2.7691362038666405	6.816996318248254	2.7691362038666405	Experiment #2
594	210	0b	SRS22C	32.318441757452604	No transfection	5.605451560011769	48.6865564919636	5.605451560011769	Experiment #2
595	211	0b	AP2 IX-1	36.792429671342894	No transfection	-2.628930003602381	0.1616639598762496	-2.628930003602381	Experiment #2
597	213	0b	SAG1	17.7762607383198	No transfection	-0.13083894826230136	0.913300198358791	-0.13083894826230144	Experiment #2
599	215	0b	bTUB	22.3250965717532	No transfection	-0.2045359802622322	0.8678177619442726	-0.2045359802622322	Experiment #2
602	218	1a	207965	30.274789343070303	Transfected	3.478111992530337	11.143356840556761	3.478111992530337	Experiment #2
603	219	1a	205210	28.9654149062039	Transfected	1.843592326070329	3.589025879482699	1.843592326070329	Experiment #2
604	220	1a	222305		Transfected				Experiment #2
606	222	1a	SRS22C	26.4421284350173	Transfected	13.172135434763579	9230.131169045602	13.172135434763579	Experiment #2
607	223	1a	AP2 IX-1	27.1292542438977	Transfected	8.724615976159317	423.02994366333763	8.724615976159317	Experiment #2
609	225	1a	SAG1	19.7462986135453	Transfected	-0.4105062711712968	0.752359309119394	-0.41050627117129673	Experiment #2
611	227	1a	bTUB	24.0869088090822	Transfected	-0.275977665274727	0.8258904506548186	-0.275977665274727	Experiment #2
614	230	1a	207965	31.0974041871365	Transfected	2.655497148464139	6.300634618647466	2.655497148464139	Experiment #2
615	231	1a	205210	29.7797516600357	Transfected	1.0292555722385295	2.0409708427782993	1.0292555722385295	Experiment #2
616	232	1a	222305		Transfected				Experiment #2
618	234	1a	SRS22C	26.597768169752197	Transfected	13.016495700028681	8286.204439753441	13.016495700028681	Experiment #2
619	235	1a	AP2 IX-1	27.168167718966302	Transfected	8.685702501090717	411.77216541026337	8.685702501090717	Experiment #2
621	237	1a	SAG1	19.619710404568	Transfected	-0.2839180621939974	0.821357348384478	-0.2839180621939974	Experiment #2
623	239	1a	bTUB	24.099151303240102	Transfected	-0.2882201594326297	0.8189117200289491	-0.2882201594326297	Experiment #2
626	242	1b	207965	31.507313867139803	Transfected	2.0100978182739304	4.028095305742152	2.0100978182739304	Experiment #2
627	243	1b	205210	28.825437112040802	Transfected	1.7480804700465207	3.3591133297835074	1.7480804700465207	Experiment #2
628	244	1b	222305		Transfected				Experiment #2
630	246	1b	SRS22C	26.7244775220941	Transfected	12.65429669749987	6446.483567829071	12.65429669749987	Experiment #2
631	247	1b	AP2 IX-1	27.2521948085388	Transfected	8.366185761331312	329.96878943152234	8.366185761331312	Experiment #2
633	249	1b	SAG1	19.5465398542553	Transfected	-0.4462371620682042	0.7339546546010696	-0.4462371620682043	Experiment #2
635	251	1b	bTUB	23.746342373063303	Transfected	-0.1709008794427369	0.8882878236805873	-0.17090087944273688	Experiment #2
638	254	1b	207965	31.263242631603397	Transfected	2.2541690538103367	4.7705944708814245	2.2541690538103367	Experiment #2
639	255	1b	205210	28.802674035050696	Transfected	1.7708435470366268	3.412534300336459	1.7708435470366268	Experiment #2
640	256	1b	222305		Transfected				Experiment #2
642	258	1b	SRS22C	26.436149775119098	Transfected	12.942624444474873	7872.599900760066	12.942624444474873	Experiment #2
643	259	1b	AP2 IX-1	27.027101946679203	Transfected	8.59127862319091	385.684838375281	8.59127862319091	Experiment #2
645	261	1b	SAG1	19.3375724081554	Transfected	-0.23726971596830282	0.8483492855517443	-0.23726971596830287	Experiment #2
647	263	1b	bTUB	23.835151944861604	Transfected	-0.25971045124103753	0.8352555383152095	-0.2597104512410376	Experiment #2
650	266	1c	207965	31.648527646943602	Transfected	1.5608184228834325	2.950211578153011	1.5608184228834325	Experiment #2
651	267	1c	205210	28.2245720221431	Transfected	2.040879944357524	4.114964385502838	2.040879944357524	Experiment #2
652	268	1c	222305		Transfected				Experiment #2
654	270	1c	SRS22C	25.9278520045055	Transfected	13.142856599501773	9044.69788955369	13.142856599501773	Experiment #2
655	271	1c	AP2 IX-1	26.3173793022115	Transfected	8.992935652071914	509.4990520903371	8.992935652071914	Experiment #2
657	273	1c	SAG1	19.4217442720726	Transfected	-0.629507195472204	0.6463971778829029	-0.6295071954722039	Experiment #2
659	275	1c	bTUB	23.506841762363702	Transfected	-0.23946588432983518	0.8470588531008643	-0.23946588432983515	Experiment #2
662	278	1c	207965	32.3460669922279	Transfected	0.8632790775991381	1.8191683728645758	0.863279077599138	Experiment #2
663	279	1c	205210	29.2065599881204	Transfected	1.058891978380224	2.0833308630256195	1.058891978380224	Experiment #2
664	280	1c	222305	30.674250210366896	Transfected	5.889131365124644	59.26594167806413	5.889131365124644	Experiment #2
666	282	1c	SRS22C	25.759754816051196	Transfected	13.310953787956077	10162.401778178573	13.310953787956077	Experiment #2
667	283	1c	AP2 IX-1	26.257954367506	Transfected	9.052360586777414	530.9236460412376	9.052360586777414	Experiment #2
669	285	1c	SAG1	19.328805293509898	Transfected	-0.536568216909501	0.6894088782678928	-0.536568216909501	Experiment #2
671	287	1c	bTUB	23.308432046058	Transfected	-0.041056168024134365	0.9719431468664207	-0.04105616802413435	Experiment #2
