# Supplementary material for: A single-parasite transcriptional atlas of Toxoplasma Gondii reveals novel control of antigen expression
Source: eLife journal article supplement (doi:10.7554/elife.54129), 2020-02-17
Supplement: supp [file elife-54129-supp-v1.zip › elife_poa_e54129_Supplementary_file_4.csv]

	pseudotime_cluster	gene_product
TGGT1_268280	1	'chromo' (CHRromatin Organization MOdifier) domain-containing protein
TGGT1_278110	1	1%2C3-beta-glucan synthase component protein
TGGT1_316520	1	1%2C4-alpha-glucan-branching enzyme
TGGT1_208820	1	1-deoxy-D-xylulose-5-phosphate synthase
TGGT1_295140	1	1-phosphatidylinositol 4-kinase
TGGT1_321310	1	16S rRNA processing protein RimM domain-containing protein
TGGT1_232390	1	18S rRNA biogenesis protein RCL1 protein
TGGT1_226300	1	2%2C4-dienoyl CoA reductase 2 peroxisomal family protein
TGGT1_255690	1	2-C-methyl-D-erythritol 2%2C4-cyclodiphosphate synthase domain-containing protein
TGGT1_319920	1	2-oxo acid dehydrogenases acyltransferase (catalytic domain) domain-containing protein
TGGT1_306610	1	3' exoribonuclease family domain 1 domain-containing protein
TGGT1_213930	1	3' exoribonuclease family domain 1 domain-containing protein
TGGT1_223672	1	3'(2')%2C5'-bisphosphate nucleotidase
TGGT1_250890	1	3'-5' exonuclease domain-containing protein
TGGT1_273100	1	3'-5' exonuclease domain-containing protein
TGGT1_257945	1	3'5'-cyclic nucleotide phosphodiesterase domain-containing protein
TGGT1_293000	1	3'5'-cyclic nucleotide phosphodiesterase domain-containing protein
TGGT1_257080	1	3'5'-cyclic nucleotide phosphodiesterase domain-containing protein
TGGT1_229405	1	3'5'-cyclic nucleotide phosphodiesterase domain-containing protein
TGGT1_233040	1	3'5'-cyclic nucleotide phosphodiesterase domain-containing protein
TGGT1_241880	1	3'5'-cyclic nucleotide phosphodiesterase domain-containing protein
TGGT1_266850	1	3-demethylubiquinone-9 3-O-methyltransferase
TGGT1_263430	1	3-hydroxyisobutyrate dehydrogenase
TGGT1_217740	1	3-ketoacyl-(acyl-carrier-protein) reductase
TGGT1_257050	1	3-methyl-2-oxobutanoate hydroxymethyltransferase
TGGT1_272180	1	3-oxo-5-alpha-steroid 4-dehydrogenase
TGGT1_203420	1	4'-phosphopantetheinyl transferase domain-containing protein
TGGT1_214440	1	4'-phosphopantetheinyl transferase superfamily protein
TGGT1_271210	1	4-alpha-glucanotransferase
TGGT1_262430	1	4-hydroxy-3-methylbut-2-en-1-yl diphosphate synthase
TGGT1_227420	1	4-hydroxy-3-methylbut-2-enyl diphosphate reductase
TGGT1_259130	1	4-hydroxybenzoate polyprenyl transferase
TGGT1_284010	1	5'-3' exonuclease N-terminal resolvase family domain-containing protein
TGGT1_258690	1	5-aminolevulinic acid synthase domain-containing protein
TGGT1_208090	1	5-formyltetrahydrofolate cyclo-ligase
TGGT1_285750	1	6%2C7-dihydropteridine reductase
TGGT1_240890	1	6-phosphofructokinase
TGGT1_242600	1	6-phosphogluconate dehydrogenase
TGGT1_305800	1	6-pyruvoyl tetrahydrobiopterin synthase
TGGT1_290970	1	8-amino-7-oxononanoate synthase
TGGT1_294880	1	8-oxoguanine DNA glycosylase N-terminal domain-containing protein
TGGT1_211690	1	AAA family protein
TGGT1_314280	1	AAR2 protein
TGGT1_313830	1	AARP2CN (NUC121) domain-containing protein
TGGT1_314330	1	ABC transporter ATP-binding domain-containing protein
TGGT1_226790	1	ABC transporter ATP-binding domain-containing protein
TGGT1_269000	1	ABC transporter family protein
TGGT1_239020	1	ABC transporter transmembrane region domain-containing protein
TGGT1_320460	1	ABC transporter transmembrane region domain-containing protein
TGGT1_263740	1	ABC transporter transmembrane region domain-containing protein
TGGT1_273360	1	ABC transporter transmembrane region domain-containing protein
TGGT1_209190	1	ABC transporter transmembrane region domain-containing protein
TGGT1_202160	1	ABC1 family protein
TGGT1_213620	1	ABC1 family protein
TGGT1_259115	1	ABC1 family protein
TGGT1_246600	1	ABC1 family protein
TGGT1_251490	1	ACR COG2135 domain-containing protein
TGGT1_216275	1	ACR YggU family COG1872 domain-containing protein
TGGT1_217050	1	ADA2-A transcriptional co-activator SAGA component
TGGT1_267540	1	AGC kinase
TGGT1_205550	1	AGC kinase
TGGT1_272200	1	AGC kinase
TGGT1_240960	1	AIG2 family protein
TGGT1_262030	1	ALG6 ALG8 glycosyltransferase family protein
TGGT1_314730	1	ALG6 ALG8 glycosyltransferase family protein
TGGT1_234280	1	AMP deaminase
TGGT1_310150	1	AMP-binding enzyme domain-containing protein
TGGT1_236980	1	AMP-binding enzyme domain-containing protein
TGGT1_310080	1	AMP-binding enzyme domain-containing protein
TGGT1_247760	1	AMP-binding enzyme domain-containing protein
TGGT1_219230	1	AMP-binding enzyme domain-containing protein
TGGT1_299150	1	AP2 domain transcription factor AP2III-3
TGGT1_299020	1	AP2 domain transcription factor AP2III-4
TGGT1_320700	1	AP2 domain transcription factor AP2IV-1
TGGT1_320680	1	AP2 domain transcription factor AP2IV-2
TGGT1_318610	1	AP2 domain transcription factor AP2IV-3
TGGT1_267460	1	AP2 domain transcription factor AP2IX-1
TGGT1_289710	1	AP2 domain transcription factor AP2IX-5
TGGT1_290180	1	AP2 domain transcription factor AP2IX-6
TGGT1_290630	1	AP2 domain transcription factor AP2IX-7
TGGT1_306620	1	AP2 domain transcription factor AP2IX-9
TGGT1_208020	1	AP2 domain transcription factor AP2Ib-1
TGGT1_220530	1	AP2 domain transcription factor AP2V-1
TGGT1_240900	1	AP2 domain transcription factor AP2VI-2
TGGT1_244510	1	AP2 domain transcription factor AP2VI-3
TGGT1_229370	1	AP2 domain transcription factor AP2VIII-1
TGGT1_233120	1	AP2 domain transcription factor AP2VIII-2
TGGT1_273660	1	AP2 domain transcription factor AP2VIII-3
TGGT1_271200	1	AP2 domain transcription factor AP2VIII-5
TGGT1_203710	1	AP2 domain transcription factor AP2VIIa-4
TGGT1_203690	1	AP2 domain transcription factor AP2VIIa-5
TGGT1_203050	1	AP2 domain transcription factor AP2VIIa-6
TGGT1_202490	1	AP2 domain transcription factor AP2VIIa-7
TGGT1_282220	1	AP2 domain transcription factor AP2VIIa-9
TGGT1_262000	1	AP2 domain transcription factor AP2VIIb-2
TGGT1_255220	1	AP2 domain transcription factor AP2VIIb-3
TGGT1_227900	1	AP2 domain transcription factor AP2X-1
TGGT1_215340	1	AP2 domain transcription factor AP2X-10
TGGT1_215570	1	AP2 domain transcription factor AP2X-11
TGGT1_225110	1	AP2 domain transcription factor AP2X-2
TGGT1_224050	1	AP2 domain transcription factor AP2X-4
TGGT1_237425	1	AP2 domain transcription factor AP2X-6
TGGT1_214960	1	AP2 domain transcription factor AP2X-8
TGGT1_310950	1	AP2 domain transcription factor AP2XI-3
TGGT1_247700	1	AP2 domain transcription factor AP2XII-4
TGGT1_249190	1	AP2 domain transcription factor AP2XII-6
TGGT1_250800	1	AP2 domain transcription factor AP2XII-8
TGGT1_262420	1	AP2 domain transcription factor APVIIb-1/ADA2-B
TGGT1_462963	1	AP2 domain-containing protein
TGGT1_215895	1	AP2 domain-containing protein
TGGT1_235980	1	ARIADNE family protein
TGGT1_246170	1	ARID/BRIGHT DNA binding domain-containing protein
TGGT1_284540	1	ATP synthase F1 delta subunit protein
TGGT1_231910	1	ATP synthase F1 gamma subunit
TGGT1_261950	1	ATP synthase beta subunit ATP-B
TGGT1_289350	1	ATP-binding cassette G family transporter ABCG84
TGGT1_244270	1	ATP-binding cassette G family transporter ABCG87
TGGT1_290580	1	ATP-binding cassette G family transporter ABCG89
TGGT1_288920	1	ATP-binding cassette G family transporter ABCG96
TGGT1_249820	1	ATP-binding cassette sub-family B member 5
TGGT1_318710	1	ATP-binding cassette sub-family F member 1
TGGT1_260310	1	ATP-binding cassette transporter ABC.B1
TGGT1_213650	1	ATP-binding domain 1 family protein
TGGT1_202850	1	ATP-binding domain-containing protein
TGGT1_203270	1	ATP-dependent Clp endopeptidase proteolytic subunit ClpP domain-containing protein
TGGT1_318320	1	ATP-dependent Clp endopeptidase proteolytic subunit ClpP domain-containing protein
TGGT1_306080	1	ATP-dependent DNA helicase RecQ family protein
TGGT1_264840	1	ATP-dependent DNA helicase RecQ family protein
TGGT1_259250	1	ATP-dependent DNA helicase RecQ family protein
TGGT1_316300	1	ATP-dependent DNA helicase RecQ family protein
TGGT1_233520	1	ATP-dependent RNA helicase
TGGT1_202630	1	ATP-dependent metallopeptidase HflB subfamily protein
TGGT1_300020	1	ATP-dependent metallopeptidase HflB subfamily protein
TGGT1_218610	1	ATPase (DUF699) protein
TGGT1_288520	1	ATPase AAA family protein
TGGT1_211050	1	ATPase AAA family protein
TGGT1_312310	1	ATPase AAA family protein
TGGT1_270900	1	ATPase AAA family protein
TGGT1_202580	1	ATPase AAA family protein
TGGT1_299168	1	ATPase AAA family protein
TGGT1_234420	1	ATPase AAA family protein
TGGT1_247390	1	ATPase AAA family protein
TGGT1_283900	1	ATPase AAA family protein
TGGT1_235610	1	ATPase AAA family protein
TGGT1_235170	1	ATPase AAA family protein
TGGT1_282200	1	ATPase AAA family protein
TGGT1_308960	1	ATPase AAA family protein
TGGT1_255210	1	ATPase AAA family protein
TGGT1_217020	1	ATPase AFG1 family protein
TGGT1_286932	1	ATPase family associated with various cellular activities (AAA) domain-containing protein
TGGT1_230830	1	ATPase family associated with various cellular activities (AAA) domain-containing protein
TGGT1_242625	1	ATPase family associated with various cellular activities (AAA) subfamily protein
TGGT1_297780	1	ATPase/histidine kinase/DNA gyrase B/HSP90 domain-containing protein
TGGT1_205720	1	Adenosine/AMP deaminase domain-containing protein
TGGT1_226910	1	Amylo-alpha-1%2C6-glucosidase
TGGT1_237600	1	Armadillo/beta-catenin family repeat-containing protein
TGGT1_289040	1	Armadillo/beta-catenin family repeat-containing protein
TGGT1_294770	1	Armadillo/beta-catenin family repeat-containing protein
TGGT1_242320	1	B-box zinc finger domain-containing protein
TGGT1_288390	1	B3GNTL1 protein
TGGT1_283765	1	B9 domain-containing protein
TGGT1_268640	1	BING4CT (NUC141) domain-containing protein
TGGT1_237480	1	BRCA1 C Terminus (BRCT) domain-containing protein
TGGT1_239790	1	BRCA1 C Terminus (BRCT) domain-containing protein
TGGT1_220320	1	BSD domain-containing protein
TGGT1_266366	1	BT1 family protein
TGGT1_236020	1	BT1 family protein
TGGT1_266860	1	BTB/POZ domain-containing protein
TGGT1_263000	1	Beige/BEACH domain-containing protein
TGGT1_239320	1	BolA family protein
TGGT1_232440	1	Brf1p family coiled coil protein
TGGT1_243610	1	C-5 cytosine-specific DNA methylase superfamily protein
TGGT1_305220	1	C-Myc-binding family protein
TGGT1_251570B	1	CAAX amino terminal protease family protein
TGGT1_251570A	1	CAAX amino terminal protease family protein
TGGT1_221170	1	CAAX metallo endopeptidase
TGGT1_300340	1	CAF1 family ribonuclease
TGGT1_233930	1	CAF1 family ribonuclease
TGGT1_253940	1	CAM Kinase family incomplete catalytic triad
TGGT1_306480	1	CAM kinase CDPK family
TGGT1_243500	1	CAM kinase SNF1/AMK1 family ToxPK1
TGGT1_285220	1	CAP-Gly domain-containing protein
TGGT1_319658	1	CBF/Mak21 family protein
TGGT1_313990	1	CBF/Mak21 family protein
TGGT1_307580	1	CBS domain-containing protein
TGGT1_211350	1	CBS domain-containing protein
TGGT1_239870	1	CBS domain-containing protein
TGGT1_259180	1	CBS family protein
TGGT1_228300	1	CCDC25 protein
TGGT1_291140	1	CCR4-Not complex component Not1 protein
TGGT1_205440	1	CCT chaperonin gamma subunit
TGGT1_261760	1	CDP-alcohol phosphatidyltransferase superfamily protein
TGGT1_254540	1	CDP-alcohol phosphatidyltransferase superfamily protein
TGGT1_320040	1	CHORD protein
TGGT1_306040	1	CHY zinc finger protein
TGGT1_254630	1	CMGC kinase
TGGT1_256070	1	CMGC kinase
TGGT1_253580	1	CMGC kinase CDK family
TGGT1_307640	1	CMGC kinase CK2 family
TGGT1_263070	1	CMGC kinase CK2 family
TGGT1_254260	1	COX19 cytochrome c oxidase assembly family protein
TGGT1_267710	1	CPSF A subunit region protein
TGGT1_254390	1	CRAL/TRIO domain-containing protein
TGGT1_290730	1	CS domain-containing protein
TGGT1_299210	1	CTP synthase
TGGT1_221200A	1	CW-type Zinc Finger protein
TGGT1_221200B	1	CW-type Zinc Finger protein
TGGT1_232370	1	CW-type Zinc Finger protein
TGGT1_230150	1	ChAPs (Chs5p-Arf1p-binding proteins) protein
TGGT1_221260	1	Class-II DAHP synthetase family protein
TGGT1_273990	1	CobW/P47K family protein
TGGT1_229320	1	Cof family hydrolase subfamily protein
TGGT1_229330	1	Cof family hydrolase subfamily protein
TGGT1_226110	1	Copper-exporting ATPase
TGGT1_305190	1	CorA family Mg2+ transporter protein
TGGT1_309240	1	CorA family Mg2+ transporter protein
TGGT1_235402	1	CorA family Mg2+ transporter protein
TGGT1_269750	1	CrcB family protein
TGGT1_221350	1	Ctr copper transporter family protein
TGGT1_249200	1	Ctr copper transporter family protein
TGGT1_305870	1	DAD family protein
TGGT1_233860	1	DALR anticodon binding domain-containing protein
TGGT1_236650	1	DEAD (Asp-Glu-Ala-Asp) box polypeptide 17
TGGT1_216860	1	DEAD (Asp-Glu-Ala-Asp) box polypeptide DDX39
TGGT1_226250	1	DEAD (Asp-Glu-Ala-Asp) box polypeptide DDX3X
TGGT1_313010	1	DEAD (Asp-Glu-Ala-Asp) box polypeptide DDX6
TGGT1_298020	1	DEAD-family helicase
TGGT1_312990	1	DEAD/DEAH box ATP-dependent RNA helicase
TGGT1_219200	1	DEAD/DEAH box RNA helicase family protein
TGGT1_220860	1	DEAD/DEAH box helicase
TGGT1_309570	1	DEAD/DEAH box helicase domain-containing protein
TGGT1_266110	1	DEAD/DEAH box helicase domain-containing protein
TGGT1_244000	1	DEAD/DEAH box helicase domain-containing protein
TGGT1_270620	1	DEAD/DEAH box helicase domain-containing protein
TGGT1_208540	1	DEAD/DEAH box helicase domain-containing protein
TGGT1_241140	1	DEAD/DEAH box helicase domain-containing protein
TGGT1_285660B	1	DEAD/DEAH box helicase domain-containing protein
TGGT1_285660A	1	DEAD/DEAH box helicase domain-containing protein
TGGT1_268290	1	DEAD/DEAH box helicase domain-containing protein
TGGT1_316750	1	DEAD/DEAH box helicase domain-containing protein
TGGT1_208842	1	DEAD/DEAH box helicase domain-containing protein
TGGT1_260450	1	DEAD/DEAH box helicase domain-containing protein
TGGT1_285660C	1	DEAD/DEAH box helicase domain-containing protein
TGGT1_251480	1	DEAD/DEAH box helicase domain-containing protein
TGGT1_284050	1	DEAD/DEAH box helicase domain-containing protein
TGGT1_222140	1	DEAD/DEAH box helicase domain-containing protein
TGGT1_230080	1	DEAD/DEAH box helicase domain-containing protein
TGGT1_223440	1	DEAD/DEAH box helicase domain-containing protein
TGGT1_259220	1	DEAD/DEAH box helicase domain-containing protein
TGGT1_264160	1	DEAD/DEAH box helicase domain-containing protein
TGGT1_203840	1	DEAD/DEAH box helicase domain-containing protein
TGGT1_295010	1	DEAD/DEAH box helicase domain-containing protein
TGGT1_221660	1	DEAD/DEAH box helicase domain-containing protein
TGGT1_263820	1	DEAD/DEAH box helicase domain-containing protein
TGGT1_291670	1	DEAD/DEAH box helicase domain-containing protein
TGGT1_294350	1	DEAD/DEAH box helicase domain-containing protein
TGGT1_253090	1	DEAD/DEAH box helicase domain-containing protein
TGGT1_279330	1	DEAD/DEAH box helicase family protein
TGGT1_272320	1	DHHC zinc finger domain-containing protein
TGGT1_284170	1	DHHC zinc finger domain-containing protein
TGGT1_224290	1	DHHC zinc finger domain-containing protein
TGGT1_229160	1	DHHC zinc finger domain-containing protein
TGGT1_213550	1	DHHC zinc finger domain-containing protein
TGGT1_301370	1	DHHC zinc finger domain-containing protein
TGGT1_255650	1	DHHC zinc finger domain-containing protein
TGGT1_250870	1	DHHC zinc finger domain-containing protein
TGGT1_224310	1	DHHC zinc finger domain-containing protein
TGGT1_214290	1	DJ-1 family protein
TGGT1_318600	1	DNA /pantothenate metabolism flavoprotein
TGGT1_216870	1	DNA excision repair helicase
TGGT1_221330	1	DNA gyrase/topoisomerase IV A subunit domain-containing protein
TGGT1_266390	1	DNA mismatch repair protein C-terminal domain-containing protein
TGGT1_236200	1	DNA mismatch repair protein C-terminal domain-containing protein
TGGT1_258030	1	DNA polymerase
TGGT1_217910	1	DNA polymerase (pol2) superfamily protein
TGGT1_237830	1	DNA polymerase I domain-containing protein
TGGT1_268600	1	DNA polymerase epsilon subunit B protein
TGGT1_280690	1	DNA polymerase epsilon subunit B protein
TGGT1_233820	1	DNA polymerase epsilon subunit B protein
TGGT1_264670	1	DNA polymerase family B protein
TGGT1_319860	1	DNA polymerase family B protein
TGGT1_297840	1	DNA primase large subunit
TGGT1_301222	1	DNA repair protein Rad4 domain-containing protein
TGGT1_249330	1	DNA repair protein rad10 subfamily protein
TGGT1_207450	1	DNA segment Chr 10 Wayne State University 52 expressed family protein
TGGT1_277530	1	DNA topoisomerase domain-containing protein
TGGT1_226480	1	DNA topoisomerase family protein
TGGT1_285540	1	DNA-directed DNA polymerase
TGGT1_356300	1	DNA-directed RNA polymerase I
TGGT1_244880	1	DNA-directed RNA polymerase I RPA1
TGGT1_297530	1	DNA-directed RNA polymerase I RPA2
TGGT1_246630	1	DNA-directed RNA polymerase I RPA43
TGGT1_267390	1	DNA-directed RNA polymerase I RPAC1
TGGT1_261540	1	DNA-directed RNA polymerase I RPAC2
TGGT1_254140	1	DNA-directed RNA polymerase II RPABC4
TGGT1_225260	1	DNA-directed RNA polymerase II RPB1
TGGT1_217560	1	DNA-directed RNA polymerase II RPB10
TGGT1_315920	1	DNA-directed RNA polymerase II RPB11A
TGGT1_258210	1	DNA-directed RNA polymerase II RPB2
TGGT1_238190	1	DNA-directed RNA polymerase II RPB3
TGGT1_231380	1	DNA-directed RNA polymerase II RPB4
TGGT1_240590	1	DNA-directed RNA polymerase II RPB5
TGGT1_270780	1	DNA-directed RNA polymerase II RPB6
TGGT1_271300	1	DNA-directed RNA polymerase II RPB7
TGGT1_202690	1	DNA-directed RNA polymerase II RPB9
TGGT1_233720	1	DNA-directed RNA polymerase II RPBABC8
TGGT1_224590	1	DNA-directed RNA polymerase III POLR3C
TGGT1_306290	1	DNA-directed RNA polymerase III RPC1
TGGT1_312250	1	DNA-directed RNA polymerase III RPC11
TGGT1_272740	1	DNA-directed RNA polymerase III RPC2
TGGT1_264460	1	DNA-directed RNA polymerase III RPC5
TGGT1_217580	1	DNA-directed RNA polymerase III RPC6
TGGT1_254280	1	DNA-directed RNA polymerase III RPC9
TGGT1_249560	1	DNA-directed RNA polymerase alpha chain rpoA
TGGT1_313120	1	DNA-directed RNA polymerase alpha subunit
TGGT1_208710	1	DNA/RNA non-specific endonuclease
TGGT1_286690	1	DNA/RNA-binding protein KIN17 domain-containing protein
TGGT1_215410	1	DPCD family protein
TGGT1_216830	1	DTW domain-containing protein
TGGT1_236530	1	DUF298 domain-containing protein
TGGT1_203450	1	DUF3228 domain-containing protein
TGGT1_243210	1	DUF862 domain-containing protein
TGGT1_288910	1	DUF866 domain-containing protein
TGGT1_313150	1	DUF89/Fructose bisphosphatase
TGGT1_217160	1	Der1 family protein
TGGT1_202020	1	DnAK-TPR
TGGT1_253650	1	DnaJ C terminal region domain-containing protein
TGGT1_207760	1	DnaJ C terminal region domain-containing protein
TGGT1_244350	1	DnaJ domain-containing protein
TGGT1_315690	1	DnaJ domain-containing protein
TGGT1_283580	1	DnaJ domain-containing protein
TGGT1_271910	1	DnaJ domain-containing protein
TGGT1_217710	1	DnaJ domain-containing protein
TGGT1_273630	1	DnaJ domain-containing protein
TGGT1_201670	1	DnaJ domain-containing protein
TGGT1_232050	1	DnaJ domain-containing protein
TGGT1_289240	1	DnaJ domain-containing protein
TGGT1_290880	1	DnaJ domain-containing protein
TGGT1_214530	1	DnaJ domain-containing protein
TGGT1_203380	1	DnaJ domain-containing protein
TGGT1_256810	1	DnaJ domain-containing protein
TGGT1_260630	1	DnaJ family Sec63 protein
TGGT1_226830	1	DnaK family protein
TGGT1_219310	1	DnaK family protein
TGGT1_214230	1	Dopey N-terminal domain-containing protein
TGGT1_280510	1	Dpy-30 motif protein
TGGT1_230460	1	Dpy-30 motif protein
TGGT1_243990	1	Dullard family phosphatase domain-containing protein
TGGT1_289070	1	E1-E2 ATPase subfamily protein
TGGT1_223520	1	EF hand domain-containing protein
TGGT1_229910	1	EF hand domain-containing protein
TGGT1_255660	1	EF hand domain-containing protein
TGGT1_315860	1	EF hand domain-containing protein
TGGT1_271750	1	EF hand domain-containing protein
TGGT1_239430	1	EF hand domain-containing protein
TGGT1_220140	1	EF hand domain-containing protein
TGGT1_284550	1	EF hand domain-containing protein
TGGT1_305830	1	EF hand domain-containing protein
TGGT1_266105	1	EF hand family protein
TGGT1_219140	1	EF-1 guanine nucleotide exchange domain-containing protein
TGGT1_226410	1	EF-1 guanine nucleotide exchange domain-containing protein
TGGT1_238220	1	EGF family domain-containing protein
TGGT1_305310	1	ERCC4 domain-containing protein
TGGT1_232815	1	Erv1 / Alr family protein
TGGT1_288620	1	Erv1 / Alr family protein
TGGT1_299230	1	F-box domain-containing protein
TGGT1_223700	1	F5/8 type C domain-containing protein
TGGT1_205658	1	F5/8 type C domain-containing protein
TGGT1_264070	1	F5/8 type C domain-containing protein
TGGT1_288500	1	FAD Malate-dehydrogenase (MDH-FAD)
TGGT1_206400	1	FAD binding domain of DNA photolyase domain-containing protein
TGGT1_232540	1	FAD binding domain-containing protein
TGGT1_263730	1	FAD-dependent glycerol-3-phosphate dehydrogenase
TGGT1_283702	1	FATC domain-containing protein
TGGT1_248530	1	FATC domain-containing protein
TGGT1_269650	1	FFD and TFG box motifs protein
TGGT1_301450	1	FG-GAP repeat-containing protein
TGGT1_287980	1	FHA domain-containing protein
TGGT1_262780	1	FHA domain-containing protein
TGGT1_203830	1	FHA domain-containing protein
TGGT1_267600	1	FHA domain-containing protein
TGGT1_216670	1	FUSE-binding protein 2 / KH-type splicing regulatory protein
TGGT1_237870	1	FYVE zinc finger domain-containing protein
TGGT1_211470	1	Fcf2 pre-rRNA processing protein
TGGT1_277010	1	Fe-S metabolism associated domain-containing protein
TGGT1_288685	1	Fe-S protein assembly co-chaperone HscB protein
TGGT1_210750	1	Ferredoxin-fold anticodon binding domain-containing protein
TGGT1_233080	1	G-patch domain-containing protein
TGGT1_214820	1	G-patch domain-containing protein
TGGT1_265410	1	G-protein beta WD-40 repeat containing protein
TGGT1_246620	1	G10 family protein
TGGT1_283840	1	GATA zinc finger domain-containing protein
TGGT1_207480	1	GCC2 and GCC3 domain-containing protein
TGGT1_292020	1	GCC2 and GCC3 domain-containing protein
TGGT1_207865	1	GCC2 and GCC3 domain-containing protein
TGGT1_207875	1	GCC2 and GCC3 domain-containing protein
TGGT1_253930	1	GCC2 and GCC3 domain-containing protein
TGGT1_307800	1	GDA1/CD39 (nucleoside phosphatase) family protein
TGGT1_225290	1	GDA1/CD39 (nucleoside phosphatase) family protein
TGGT1_257960	1	GDP-D-mannose pyrophosphorylase
TGGT1_229780	1	GHMP kinase N-terminal domain-containing protein
TGGT1_313950	1	GMC oxidoreductase
TGGT1_244850	1	GMC oxidoreductase
TGGT1_213340	1	GMC oxidoreductase
TGGT1_203490	1	GNL3L/Grn1 GTPase
TGGT1_275568	1	GPI transamidase subunit PIG-U protein
TGGT1_224600	1	GTP binding protein
TGGT1_248340	1	GTP-binding nuclear protein ran/tc4
TGGT1_217760	1	GTP-binding protein
TGGT1_260360	1	GTP-binding protein
TGGT1_244310	1	GTP-binding protein
TGGT1_286640	1	GTPase
TGGT1_248880	1	GTPase RAB7
TGGT1_224610	1	GYF domain-containing protein
TGGT1_204160	1	GYF domain-containing protein
TGGT1_298610	1	GYF domain-containing protein
TGGT1_295460	1	Got1 family protein
TGGT1_308000	1	Gpi16 subunit GPI transamidase component protein
TGGT1_209870	1	HAD hydrolase family IIA protein
TGGT1_222010	1	HAD hydrolase family IIID protein
TGGT1_289080	1	HEAT repeat-containing protein
TGGT1_207970	1	HEAT repeat-containing protein
TGGT1_231600	1	HEAT repeat-containing protein
TGGT1_295040	1	HEAT repeat-containing protein
TGGT1_305040	1	HEAT repeat-containing protein
TGGT1_244040	1	HEAT repeat-containing protein
TGGT1_264752	1	HEAT repeat-containing protein
TGGT1_229180	1	HEAT repeat-containing protein
TGGT1_255390	1	HEAT repeat-containing protein
TGGT1_216590	1	HEAT repeat-containing protein
TGGT1_280420	1	HEAT repeat-containing protein
TGGT1_215040	1	HEAT repeat-containing protein
TGGT1_290990	1	HEAT repeat-containing protein
TGGT1_315670	1	HEAT repeat-containing protein
TGGT1_290340	1	HEAT repeat-containing protein
TGGT1_260270	1	HEAT repeat-containing protein
TGGT1_266280	1	HEAT repeat-containing protein
TGGT1_260420	1	HEC/Ndc80p family protein
TGGT1_280660	1	HECT-domain (ubiquitin-transferase) domain-containing protein
TGGT1_270580	1	HECT-domain (ubiquitin-transferase) domain-containing protein
TGGT1_291980	1	HECT-domain (ubiquitin-transferase) domain-containing protein
TGGT1_278940	1	HECT-domain (ubiquitin-transferase) domain-containing protein
TGGT1_295710	1	HECT-domain (ubiquitin-transferase) domain-containing protein
TGGT1_217500	1	HMG (high mobility group) box domain-containing protein
TGGT1_219828	1	HMG (high mobility group) box domain-containing protein
TGGT1_297925	1	HesB-like domain-containing protein
TGGT1_268720	1	Hrf1 family protein
TGGT1_232660	1	Hsp70 interacting protein HIP
TGGT1_310430B	1	Hsp90 domain-containing protein
TGGT1_310430A	1	Hsp90 domain-containing protein
TGGT1_243298	1	ICE family protease (caspase) p20 domain-containing protein
TGGT1_206490	1	ICE family protease (caspase) p20 domain-containing protein
TGGT1_205480	1	IMC subcompartment protein ISP4
TGGT1_262120	1	IQ calmodulin-binding motif domain-containing protein
TGGT1_244728	1	IQ calmodulin-binding motif domain-containing protein
TGGT1_226950	1	IgA-specific metalloendopeptidase
TGGT1_234580	1	ImpB/MucB/SamB family protein
TGGT1_308880	1	ImpB/MucB/SamB family protein
TGGT1_233000	1	KOW motif domain-containing protein
TGGT1_252190	1	KRUF family protein
TGGT1_251170	1	KRUF family protein
TGGT1_295935	1	KRUF family protein
TGGT1_408710	1	KRUF family protein
TGGT1_292375	1	KRUF family protein
TGGT1_366530	1	KRUF family protein
TGGT1_295950	1	KRUF family protein
TGGT1_409970	1	KRUF family protein
TGGT1_411370	1	KRUF family protein
TGGT1_323020	1	KRUF family protein
TGGT1_283470	1	Kazal-type serine protease inhibitor domain-containing protein
TGGT1_266610	1	Kazal-type serine protease inhibitor domain-containing protein
TGGT1_230135	1	Kinesin-associated protein
TGGT1_312510	1	Ku70/Ku80 beta-barrel domain-containing protein
TGGT1_315130	1	L-isoaspartyl protein carboxyl methyltransferase family protein
TGGT1_252270	1	L1P family of ribosomal protein
TGGT1_244580	1	L1P family of ribosomal protein
TGGT1_288400	1	LETM1 family protein
TGGT1_267350	1	LSM domain-containing protein
TGGT1_300280	1	LSM domain-containing protein
TGGT1_222290	1	LSM domain-containing protein
TGGT1_278950	1	LSM domain-containing protein
TGGT1_298970	1	LSM3 U6 small nuclear RNA associated isoform 2 family protein
TGGT1_265820	1	Las1 family protein
TGGT1_314900	1	LisH protein
TGGT1_308580	1	Lon protease family protein
TGGT1_231440	1	LsmAD domain-containing protein
TGGT1_216990	1	LysM domain-containing protein
TGGT1_286782	1	MAM domain-containing protein
TGGT1_270450	1	MCM2/3/5 family protein
TGGT1_315600	1	MCM2/3/5 family protein
TGGT1_216730	1	MCM2/3/5 family protein
TGGT1_214940	1	MIC2-associated protein M2AP
TGGT1_246040	1	MIF4G domain-containing protein
TGGT1_254940	1	MIF4G domain-containing protein
TGGT1_269180	1	MIF4G domain-containing protein
TGGT1_244910	1	MIZ/SP-RING zinc finger domain-containing protein
TGGT1_223060	1	MORN repeat-containing protein
TGGT1_235515	1	MORN repeat-containing protein
TGGT1_319880	1	MORN repeat-containing protein
TGGT1_239730	1	MORN repeat-containing protein
TGGT1_233270	1	MORN repeat-containing protein
TGGT1_297150	1	MORN repeat-containing protein
TGGT1_201890	1	MORN repeat-containing protein
TGGT1_318590	1	MRP family domain-containing protein
TGGT1_310850	1	MYND finger domain-containing protein
TGGT1_228220	1	MYND finger domain-containing protein
TGGT1_240450	1	Maf family protein
TGGT1_249950	1	Mak16 protein
TGGT1_243280B	1	Met-10+ like-protein
TGGT1_243280A	1	Met-10+ like-protein
TGGT1_304730	1	Mob1/phocein family protein
TGGT1_293480	1	MoeA N-terminal region (domain I and II) domain-containing protein
TGGT1_269250	1	Mov34/MPN/PAD-1 family protein
TGGT1_215510	1	MraW methylase family protein
TGGT1_278060	1	Mre11 DNA-binding domain-containing protein
TGGT1_261000	1	MutS domain V domain-containing protein
TGGT1_264120	1	Myb family DNA-binding domain-containing protein
TGGT1_306320	1	Myb family DNA-binding domain-containing protein
TGGT1_275480	1	Myb family DNA-binding domain-containing protein
TGGT1_321450	1	Myb family DNA-binding domain-containing protein
TGGT1_213890	1	Myb family DNA-binding domain-containing protein
TGGT1_241860	1	N-acetylglucosaminyl-phosphatidylinositol biosynthetic protein PigA family GT4 protein
TGGT1_258110	1	N-acetylglucosaminylphosphatidylinositol deacetylase
TGGT1_219760	1	N-acetyltransferase family protein
TGGT1_205558	1	NAC domain-containing protein
TGGT1_270000	1	NAD dependent epimerase/dehydratase family protein
TGGT1_244700	1	NAD(+)/NADH kinase domain-containing protein
TGGT1_203580	1	NAD-binding domain 4 domain-containing protein
TGGT1_288830	1	NADH dehydrogenase (NDH2-II)
TGGT1_293180	1	NADP-specific glutamate dehydrogenase
TGGT1_219130	1	NADPH-glutathione reductase
TGGT1_264880	1	NEDD8-activating enzyme E1 catalytic subunit
TGGT1_319700	1	NEK kinase
TGGT1_218400	1	NEK kinase
TGGT1_266710	1	NEK kinase
TGGT1_244620	1	NEK kinase
TGGT1_309950	1	NLE (NUC135) domain-containing protein
TGGT1_228330	1	NLI interacting factor family phosphatase
TGGT1_283590B	1	NLI interacting factor family phosphatase
TGGT1_283590A	1	NLI interacting factor family phosphatase
TGGT1_216480	1	NMD3 family protein
TGGT1_294440	1	NOL1/NOP2/sun family protein
TGGT1_288530	1	NOL1/NOP2/sun family protein
TGGT1_222340	1	NOL1/NOP2/sun family protein
TGGT1_257150	1	NOT2 / NOT3 / NOT5 family protein
TGGT1_271440	1	NPL4 family protein
TGGT1_259200B	1	Na+/H+ exchanger NHE1
TGGT1_259200A	1	Na+/H+ exchanger NHE1
TGGT1_305180	1	Na+/H+ exchanger NHE3
TGGT1_305840	1	Nicotinate-nucleotide adenylyltransferase
TGGT1_221922	1	NifU family domain-containing protein
TGGT1_212930	1	NifU family domain-containing protein
TGGT1_218570	1	Nin one binding (NOB1) Zn-ribbon family protein
TGGT1_259920	1	Nitric-oxide synthase
TGGT1_260320	1	Noc2p family protein
TGGT1_233020	1	Not1 N-terminal domain CCR4-Not complex component protein
TGGT1_259960	1	Nucleoside-diphosphatase
TGGT1_220250	1	Nucleotide-sensitive chloride conductance regulator (ICln) protein
TGGT1_248980	1	NudC family protein
TGGT1_309380	1	Nuf2
TGGT1_273500	1	O-linked N-acetylglucosamine transferase
TGGT1_315170	1	O-phosphoseryl-tRNA(Sec) selenium transferase
TGGT1_202310	1	O-sialoglycoprotein endopeptidase
TGGT1_203170	1	OB-fold nucleic acid binding domain-containing protein
TGGT1_216440	1	OTU family cysteine protease
TGGT1_243430	1	OTU family cysteine protease
TGGT1_356210	1	OTU family cysteine protease
TGGT1_362240	1	OTU family cysteine protease
TGGT1_237894	1	OTU family cysteine protease
TGGT1_243510	1	OTU family cysteine protease
TGGT1_294320	1	Oxysterol-binding protein
TGGT1_252640	1	P-type ATPase PMA1
TGGT1_318460	1	P-type ATPase of unknown pump specificity (type V) protein
TGGT1_256040	1	PA14 domain-containing protein
TGGT1_258400	1	PA14 domain-containing protein
TGGT1_209920B	1	PAN domain-containing protein
TGGT1_235200	1	PAN domain-containing protein
TGGT1_249150	1	PAN domain-containing protein
TGGT1_209920A	1	PAN domain-containing protein
TGGT1_235183	1	PAN domain-containing protein
TGGT1_235315	1	PAN domain-containing protein
TGGT1_286150	1	PAN/Apple domain-containing protein
TGGT1_247360	1	PAP2 superfamily protein
TGGT1_217820	1	PCI domain-containing protein
TGGT1_273520	1	PCI domain-containing protein
TGGT1_236220	1	PCI domain-containing protein
TGGT1_289650	1	PEP-carboxykinase I
TGGT1_233838	1	PET112 family C terminal region domain-containing protein
TGGT1_205040	1	PGAP1 family protein
TGGT1_310350	1	PGAP1 family protein
TGGT1_234900	1	PHD-finger domain-containing protein
TGGT1_208200	1	PHD-finger domain-containing protein
TGGT1_224260	1	PHD-finger domain-containing protein
TGGT1_291000	1	PHD-finger domain-containing protein
TGGT1_235550	1	PHD-finger domain-containing protein
TGGT1_204140	1	PHD-finger domain-containing protein
TGGT1_230890	1	PHD-finger domain-containing protein
TGGT1_207980	1	PIG-P protein
TGGT1_310190	1	PIK3R4 kinase-related protein (incomplete catalytic triad)
TGGT1_253750	1	PLU-1 family protein
TGGT1_254730	1	POPLD (NUC188) domain-containing protein
TGGT1_294380	1	PP-loop domain-containing protein
TGGT1_309020	1	PP-loop family protein
TGGT1_215100	1	PP-loop family protein
TGGT1_228040	1	PPIC-type PPIASE domain-containing protein
TGGT1_253420	1	PQ loop repeat-containing protein
TGGT1_254250	1	PRELI family protein
TGGT1_285230	1	PRP38 family protein
TGGT1_314740	1	PSP protein
TGGT1_410730	1	PT repeat protein
TGGT1_222110	1	PUB domain-containing protein
TGGT1_209100	1	PUB domain-containing protein
TGGT1_270770	1	PWI domain-containing protein
TGGT1_311160	1	PWI domain-containing protein
TGGT1_216750	1	Paf1/RNA polymerase II complex component LEO1
TGGT1_249710	1	Parkinson disease 7 domain containing 1 family protein
TGGT1_263250	1	Pb-fam-5 protein
TGGT1_289730	1	Pep3/Vps18/deep orange family protein
TGGT1_219240	1	Peptidyl-tRNA hydrolase PTH2 domain-containing protein
TGGT1_310280	1	Phosphoethanolamine-cytidyltransferase
TGGT1_313970	1	Phytanoyl-CoA dioxygenase (PhyH) superfamily protein
TGGT1_275410	1	Proteasome/cyclosome repeat-containing protein
TGGT1_321290	1	Prp18 domain-containing protein
TGGT1_236580	1	Prp31-15.5k-U4 Snrna Complex family protein
TGGT1_318350	1	Pumilio-family RNA binding repeat-containing protein
TGGT1_260600	1	Pumilio-family RNA binding repeat-containing protein
TGGT1_307030	1	Purine nucleoside phosphorylase
TGGT1_269740	1	R3H domain-containing protein
TGGT1_203870	1	RAB43 member RAS oncogene family protein
TGGT1_285840	1	RAP domain-containing protein
TGGT1_232100	1	RAP domain-containing protein
TGGT1_260790	1	RAP domain-containing protein
TGGT1_306950	1	RAP domain-containing protein
TGGT1_225510	1	RAP domain-containing protein
TGGT1_213420	1	RAP domain-containing protein
TGGT1_237100	1	RAP domain-containing protein
TGGT1_239350	1	RAP domain-containing protein
TGGT1_211890	1	RAP domain-containing protein
TGGT1_289200	1	RAP domain-containing protein
TGGT1_202240	1	RAP domain-containing protein
TGGT1_307600	1	RCC1 domain containing protein
TGGT1_249360	1	RED family protein
TGGT1_314875	1	RIC1 protein
TGGT1_267440	1	RING zinc finger protein
TGGT1_227260	1	RIO1 family protein
TGGT1_210830	1	RIO1 family protein
TGGT1_232640	1	RNA 2'-phosphotransferase Tpt1/KptA family protein
TGGT1_257290	1	RNA 2'-phosphotransferase Tpt1/KptA family protein
TGGT1_254950	1	RNA cap guanine-N2 methyltransferase
TGGT1_285520	1	RNA cap guanine-N2 methyltransferase
TGGT1_263340	1	RNA methyltransferase TrmH family protein
TGGT1_218580	1	RNA methyltransferase TrmH family protein
TGGT1_216390	1	RNA methyltransferase TrmH family protein
TGGT1_306210	1	RNA polymerase II accessory factor CDC73
TGGT1_249680	1	RNA polymerase II associated Paf1 complex component PAF1
TGGT1_292310	1	RNA polymerase Rpb7 N-terminal domain-containing protein
TGGT1_244210	1	RNA polymerase-associated protein RTF1
TGGT1_216760	1	RNA pseudouridine synthase superfamily protein
TGGT1_306660	1	RNA pseudouridine synthase superfamily protein
TGGT1_312370	1	RNA pseudouridine synthase superfamily protein
TGGT1_205410	1	RNA pseudouridine synthase superfamily protein
TGGT1_298980	1	RNA pseudouridine synthase superfamily protein
TGGT1_316680	1	RNA pseudouridine synthase superfamily protein
TGGT1_202640	1	RNA pseudouridine synthase superfamily protein
TGGT1_313910	1	RNA recognition motif 2 protein
TGGT1_299030	1	RNA recognition motif 2 protein
TGGT1_262620	1	RNA recognition motif-containing protein
TGGT1_294812	1	RNA recognition motif-containing protein
TGGT1_264610	1	RNA recognition motif-containing protein
TGGT1_268380	1	RNA recognition motif-containing protein
TGGT1_203080	1	RNA recognition motif-containing protein
TGGT1_320100	1	RNA recognition motif-containing protein
TGGT1_309800	1	RNA recognition motif-containing protein
TGGT1_211020	1	RNA recognition motif-containing protein
TGGT1_236540	1	RNA recognition motif-containing protein
TGGT1_217540	1	RNA recognition motif-containing protein
TGGT1_268200	1	RNA recognition motif-containing protein
TGGT1_310050	1	RNA recognition motif-containing protein
TGGT1_290660	1	RNA recognition motif-containing protein
TGGT1_272890	1	RNA recognition motif-containing protein
TGGT1_266740	1	RNA recognition motif-containing protein
TGGT1_272440	1	RNA recognition motif-containing protein
TGGT1_289010	1	RNA recognition motif-containing protein
TGGT1_202770	1	RNA recognition motif-containing protein
TGGT1_304760	1	RNA recognition motif-containing protein
TGGT1_224580	1	RNA recognition motif-containing protein
TGGT1_240710	1	RNA recognition motif-containing protein
TGGT1_270880	1	RNA recognition motif-containing protein
TGGT1_209850	1	RNA recognition motif-containing protein
TGGT1_294710	1	RNA recognition motif-containing protein
TGGT1_291950	1	RNA recognition motif-containing protein
TGGT1_215230	1	RNA recognition motif-containing protein
TGGT1_291930	1	RNA recognition motif-containing protein
TGGT1_318690	1	RNA recognition motif-containing protein
TGGT1_223855	1	RNA recognition motif-containing protein
TGGT1_292200	1	RNA recognition motif-containing protein
TGGT1_265530	1	RNA recognition motif-containing protein
TGGT1_218600	1	RNA recognition motif-containing protein
TGGT1_265250	1	RNA recognition motif-containing protein
TGGT1_240070	1	RNA recognition motif-containing protein
TGGT1_321500	1	RNA recognition motif-containing protein
TGGT1_306600	1	RNA recognition motif-containing protein
TGGT1_211420	1	RNA recognition motif-containing protein
TGGT1_283878	1	RNA recognition motif-containing protein
TGGT1_289560	1	RNA recognition motif-containing protein
TGGT1_305850	1	RNA recognition motif-containing protein
TGGT1_215400	1	RNA recognition motif-containing protein
TGGT1_263595	1	RNA-binding protein
TGGT1_217182	1	RNA-dependent RNA polymerase RDP
TGGT1_316090	1	RNAse P Rpr2/Rpp21 subunit domain-containing protein
TGGT1_261050	1	RNB family domain-containing protein
TGGT1_202720	1	RNB family domain-containing protein
TGGT1_239480	1	RNB family domain-containing protein
TGGT1_314530	1	RPAP1 family protein
TGGT1_208750	1	RWD domain-containing protein
TGGT1_258130	1	Rab1 protein
TGGT1_255430	1	Rad9 protein
TGGT1_222040	1	Ran-interacting Mog1 protein
TGGT1_267045	1	Ras family protein
TGGT1_257340	1	Ras family protein
TGGT1_225430	1	Ras-related GTP binding A family protein
TGGT1_247250	1	RbAp46
TGGT1_264820	1	RbAp48
TGGT1_231170	1	RecF/RecN/SMC N terminal domain-containing protein
TGGT1_257180	1	RecF/RecN/SMC N terminal domain-containing protein
TGGT1_306310	1	RecF/RecN/SMC N terminal domain-containing protein
TGGT1_216250	1	RecF/RecN/SMC N terminal domain-containing protein
TGGT1_297800	1	RecF/RecN/SMC N terminal domain-containing protein
TGGT1_288700	1	RecF/RecN/SMC N terminal domain-containing protein
TGGT1_309400	1	RecF/RecN/SMC N terminal domain-containing protein
TGGT1_253330	1	Rhoptry kinase family protein
TGGT1_249470	1	Rhoptry kinase family protein
TGGT1_219590	1	RuvB family 1 protein
TGGT1_288860	1	RuvB family 2 protein
TGGT1_286620	1	S1 RNA binding domain-containing protein
TGGT1_217790	1	S1 RNA binding domain-containing protein
TGGT1_259990	1	SAC3/GANP family protein
TGGT1_262040	1	SAC3/GANP family protein
TGGT1_295600	1	SAG-related sequence SRS10
TGGT1_321490	1	SAG-related sequence SRS12A
TGGT1_321470	1	SAG-related sequence SRS12D
TGGT1_254060	1	SAG-related sequence SRS14A
TGGT1_320180	1	SAG-related sequence SRS16C
TGGT1_319360	1	SAG-related sequence SRS17A
TGGT1_301140	1	SAG-related sequence SRS19A
TGGT1_301180	1	SAG-related sequence SRS19F
TGGT1_238460	1	SAG-related sequence SRS22B
TGGT1_238470	1	SAG-related sequence SRS22C
TGGT1_238480	1	SAG-related sequence SRS22D
TGGT1_238490	1	SAG-related sequence SRS22E
TGGT1_238500	1	SAG-related sequence SRS22F
TGGT1_239090	1	SAG-related sequence SRS23
TGGT1_213280	1	SAG-related sequence SRS25
TGGT1_259300	1	SAG-related sequence SRS26B
TGGT1_259270	1	SAG-related sequence SRS26E
TGGT1_329710	1	SAG-related sequence SRS26I
TGGT1_272560	1	SAG-related sequence SRS31B
TGGT1_280570	1	SAG-related sequence SRS35A
TGGT1_280580	1	SAG-related sequence SRS35B
TGGT1_292250	1	SAG-related sequence SRS36A
TGGT1_292270	1	SAG-related sequence SRS36C
TGGT1_292280	1	SAG-related sequence SRS36D
TGGT1_210320	1	SAG-related sequence SRS37A
TGGT1_210330	1	SAG-related sequence SRS37B
TGGT1_281930	1	SAG-related sequence SRS39
TGGT1_224790	1	SAG-related sequence SRS40A
TGGT1_224750	1	SAG-related sequence SRS40F
TGGT1_264660	1	SAG-related sequence SRS44
TGGT1_214190	1	SAG-related sequence SRS46
TGGT1_275360	1	SAG-related sequence SRS47B
TGGT1_207010	1	SAG-related sequence SRS48K
TGGT1_207130	1	SAG-related sequence SRS49A
TGGT1_207140	1	SAG-related sequence SRS49B
TGGT1_207150	1	SAG-related sequence SRS49C
TGGT1_207160	1	SAG-related sequence SRS49D
TGGT1_315320	1	SAG-related sequence SRS52A
TGGT1_315330	1	SAG-related sequence SRS52D
TGGT1_315400	1	SAG-related sequence SRS53D
TGGT1_246070	1	SAG-related sequence SRS56
TGGT1_308020	1	SAG-related sequence SRS57
TGGT1_251958	1	SAG-related sequence SRS59B
TGGT1_279000	1	SAG-related sequence SRS59J
TGGT1_251962	1	SAG-related sequence SRS59K
TGGT1_224170	1	SAG-related sequence SRS60A
TGGT1_359770	1	SAG-related sequence protein SRS22E
TGGT1_409710	1	SAG-related sequence protein SRS22G
TGGT1_409700	1	SAG-related sequence protein SRS22I
TGGT1_408950	1	SAG-related sequence protein SRS26A
TGGT1_362620	1	SAG-related sequence protein SRS48E
TGGT1_409870	1	SAG-related sequence protein SRS48K
TGGT1_410980	1	SAG-related sequence protein SRS48Q
TGGT1_411200	1	SAG-related sequence protein SRS48Q
TGGT1_408740	1	SAG-related sequence protein SRS59B
TGGT1_273430	1	SAM-dependent methyltransferase
TGGT1_202870	1	SAP domain-containing protein
TGGT1_318140	1	SART-1 family protein
TGGT1_257440	1	SCO1/SenC protein
TGGT1_278120	1	SCP family extracellular subfamily protein
TGGT1_222960	1	SCY kinase-related protein (incomplete catalytic triad)
TGGT1_281900	1	SET domain containing lysine methyltransferase KMTox
TGGT1_305820	1	SGS domain-containing protein
TGGT1_231590	1	SGS domain-containing protein
TGGT1_233190	1	SKIP/SNW domain-containing protein
TGGT1_248870	1	SNARE associated Golgi protein
TGGT1_279370	1	SNARE associated Golgi protein
TGGT1_215420	1	SNARE protein
TGGT1_205402	1	SNF2 family N-terminal domain-containing protein
TGGT1_310530	1	SNF2 family N-terminal domain-containing protein
TGGT1_225108	1	SNF7 family protein
TGGT1_220460	1	SNF7 family protein
TGGT1_233100	1	SPFH domain / Band 7 family protein
TGGT1_224720	1	SPOC domain-containing protein
TGGT1_293060	1	SPRY domain-containing protein
TGGT1_221450	1	SPRY domain-containing protein
TGGT1_290270	1	SPRY domain-containing protein
TGGT1_286730	1	SRP19 protein
TGGT1_209860	1	SRP40 C-terminal domain-containing protein
TGGT1_275802	1	SRP72 RNA-binding domain-containing protein
TGGT1_248780	1	SRR1 protein
TGGT1_236660	1	START domain-containing protein
TGGT1_223150	1	START domain-containing protein
TGGT1_313020	1	STAS domain-containing protein
TGGT1_273870	1	SWI2/SNF2 ISWI-like (AT hook)
TGGT1_280800	1	SWI2/SNF2 SRCAP/Ino80
TGGT1_236970	1	SWI2/SNF2-containing PHD finger protein
TGGT1_277070	1	SWI2/SNF2-containing protein
TGGT1_273780	1	SWI2/SNF2-containing protein
TGGT1_229460	1	SWI2/SNF2-containing protein
TGGT1_226440	1	SWI2/SNF2-containing protein RAD16
TGGT1_318480	1	SWI2/SNF2-containing protein RAD5
TGGT1_232450	1	SWI2/SNF2-containing protein RAD54
TGGT1_232220	1	SWIB/MDM2 domain-containing protein
TGGT1_286920	1	SWIRM domain-containing protein
TGGT1_256830	1	SacI domain-containing protein
TGGT1_250010	1	Sad1 / UNC family protein
TGGT1_207120	1	Sad1/UNC family protein
TGGT1_316900	1	Sas10 C-terminal domain-containing protein
TGGT1_252320	1	Sas10/Utp3/C1D family protein
TGGT1_240740	1	Sec1 family protein
TGGT1_271060	1	Sec1 family protein
TGGT1_226510	1	Sec23/Sec24 trunk domain-containing protein
TGGT1_266830	1	Sec7 domain-containing protein
TGGT1_254490	1	Sel1 repeat-containing protein
TGGT1_313690	1	Sel1 repeat-containing protein
TGGT1_260530	1	Sel1 repeat-containing protein
TGGT1_238230	1	Ser/Thr phosphatase family protein
TGGT1_222840	1	Ser/Thr phosphatase family protein
TGGT1_297650	1	Ser/Thr phosphatase family protein
TGGT1_254770	1	Ser/Thr phosphatase family protein
TGGT1_316730	1	Sma protein
TGGT1_314340	1	Sodium:neurotransmitter symporter family protein
TGGT1_233410	1	Sof1 family domain-containing protein
TGGT1_310130	1	Spc97 / Spc98 family protein
TGGT1_209970	1	Spc97 / Spc98 family protein
TGGT1_263510	1	Spc97 / Spc98 family protein
TGGT1_217850	1	Sucrose-6F-phosphate phosphohydrolase
TGGT1_216170	1	SufS subfamily cysteine desulfurase
TGGT1_272910	1	T-complex protein 1 delta subunit
TGGT1_297500	1	T-complex protein 1 eta subunit
TGGT1_309170	1	TAF7-like RNA polymerase II TAF7L
TGGT1_233400	1	TAF9 RNA polymerase II TATA box binding protein (TBP)-associated factor isoform 2 family protein
TGGT1_218250	1	TAP42 family protein
TGGT1_291080	1	TATA-box binding protein TBP1
TGGT1_211710	1	TB2/DP1 HVA22 family protein
TGGT1_257040	1	TB2/DP1 HVA22 family protein
TGGT1_285730	1	TBC domain containing protein
TGGT1_226550	1	TBC domain containing protein
TGGT1_250680	1	TBC domain-containing kinase (incomplete catalytic triad)
TGGT1_261200	1	TBC domain-containing protein
TGGT1_216430	1	TBC domain-containing protein
TGGT1_275350	1	TBC domain-containing protein
TGGT1_221710	1	TBC domain-containing protein
TGGT1_269660	1	TFIIH basal transcription factor complex helicase XPB subunit
TGGT1_255370	1	TIC20 protein
TGGT1_202810	1	TIM14 protein
TGGT1_293372	1	TIP49 family protein
TGGT1_262390	1	TLD protein
TGGT1_215500	1	TPR repeat-containing protein
TGGT1_411580	1	TPRX1
TGGT1_411090	1	TPRX1 protein
TGGT1_261560	1	Tat binding protein 1(TBP-1)-interacting protein TBPIP
TGGT1_217660	1	Tctex-1 family protein
TGGT1_231940	1	ThiF family protein
TGGT1_311500	1	ThiF family protein
TGGT1_314890	1	ThiF family protein
TGGT1_212100	1	ThiF family protein
TGGT1_274070	1	ThiF family protein
TGGT1_254610	1	Tim10/DDP family zinc finger superfamily protein
TGGT1_227870	1	Tim10/DDP family zinc finger superfamily protein
TGGT1_278290	1	Toxoplasma gondii family A protein
TGGT1_278330	1	Toxoplasma gondii family A protein
TGGT1_278410	1	Toxoplasma gondii family A protein
TGGT1_278340	1	Toxoplasma gondii family A protein
TGGT1_278350	1	Toxoplasma gondii family A protein
TGGT1_278420	1	Toxoplasma gondii family A protein
TGGT1_278430	1	Toxoplasma gondii family A protein
TGGT1_278090	1	Toxoplasma gondii family A protein
TGGT1_243150	1	Toxoplasma gondii family A protein
TGGT1_243160	1	Toxoplasma gondii family A protein
TGGT1_243180	1	Toxoplasma gondii family A protein
TGGT1_243190	1	Toxoplasma gondii family A protein
TGGT1_278380	1	Toxoplasma gondii family A protein
TGGT1_278360	1	Toxoplasma gondii family A protein
TGGT1_243140	1	Toxoplasma gondii family A protein
TGGT1_307460	1	Toxoplasma gondii family B protein
TGGT1_301890	1	Toxoplasma gondii family B protein
TGGT1_307480	1	Toxoplasma gondii family B protein
TGGT1_279460	1	Toxoplasma gondii family B protein
TGGT1_295300	1	Toxoplasma gondii family B protein
TGGT1_274290	1	Toxoplasma gondii family B protein
TGGT1_299570	1	Toxoplasma gondii family B protein
TGGT1_244920	1	Toxoplasma gondii family B protein
TGGT1_200480	1	Toxoplasma gondii family B protein
TGGT1_264225	1	Toxoplasma gondii family B protein
TGGT1_320770	1	Toxoplasma gondii family B protein
TGGT1_220080	1	Toxoplasma gondii family C protein
TGGT1_200130	1	Toxoplasma gondii family C protein
TGGT1_307260	1	Toxoplasma gondii family C protein
TGGT1_205090	1	Toxoplasma gondii family D protein
TGGT1_236975	1	Toxoplasma gondii family D protein
TGGT1_271590	1	Toxoplasma gondii family D protein
TGGT1_277572	1	Toxoplasma gondii family D protein
TGGT1_313000	1	Toxoplasma gondii family D protein
TGGT1_271580	1	Toxoplasma gondii family D protein
TGGT1_294600	1	Toxoplasma gondii family D protein
TGGT1_240360	1	Toxoplasma gondii family E protein
TGGT1_240325	1	Toxoplasma gondii family E protein
TGGT1_240370	1	Toxoplasma gondii family E protein
TGGT1_240310B	1	Toxoplasma gondii family E protein
TGGT1_240340B	1	Toxoplasma gondii family E protein
TGGT1_318130B	1	Toxoplasma gondii family E protein
TGGT1_318130A	1	Toxoplasma gondii family E protein
TGGT1_270540	1	Trm112p family domain-containing protein
TGGT1_318240	1	Tubulin-tyrosine ligase family protein
TGGT1_278930	1	Tubulin-tyrosine ligase family protein
TGGT1_307760	1	Tubulin-tyrosine ligase family protein
TGGT1_228410	1	Tubulin-tyrosine ligase family protein
TGGT1_225770	1	Tyrosine kinase-like (TKL) protein
TGGT1_253860	1	Tyrosine kinase-like (TKL) protein
TGGT1_234970	1	Tyrosine kinase-like (TKL) protein
TGGT1_239130	1	Tyrosine kinase-like (TKL) protein
TGGT1_280490	1	U-box domain-containing protein
TGGT1_285760	1	U-snRNP-associated cyclophilin family protein
TGGT1_221980	1	U1 zinc finger protein
TGGT1_306380	1	U1 zinc finger protein
TGGT1_234520	1	U2 snRNP auxilliary factor large subunit splicing factor subfamily protein
TGGT1_253520	1	U3 small nucleolar RNA-associated protein 6 protein
TGGT1_286560	1	U6 snRNA-associated Sm family protein
TGGT1_232180	1	UBA/TS-N domain-containing protein
TGGT1_288340	1	UBX domain-containing protein
TGGT1_254580	1	UDP-galactose transporter family protein
TGGT1_267380	1	UDP-galactose transporter subfamily protein
TGGT1_225880	1	UDP-glucose 4-epimerase
TGGT1_316150	1	ULK kinase
TGGT1_255710	1	ULK kinase
TGGT1_257740	1	UMP-CMP kinase
TGGT1_264780	1	UTP-glucose-1-phosphate uridylyltransferase subfamily protein
TGGT1_214470	1	Ulp1 protease family C-terminal catalytic domain-containing protein
TGGT1_277550	1	UvrD/REP helicase domain-containing protein
TGGT1_281920	1	V-type ATPase D subunit protein
TGGT1_295330	1	Vps54 family protein
TGGT1_320210	1	WD domain G-beta repeat domain containing protein
TGGT1_357130	1	WD domain G-beta repeat protein
TGGT1_319570	1	WD domain G-beta repeat-containing protein
TGGT1_239590	1	WD domain G-beta repeat-containing protein
TGGT1_288600	1	WD domain G-beta repeat-containing protein
TGGT1_223262	1	WD domain G-beta repeat-containing protein
TGGT1_245752	1	WD domain G-beta repeat-containing protein
TGGT1_311625	1	WD domain G-beta repeat-containing protein
TGGT1_269900	1	WD domain G-beta repeat-containing protein
TGGT1_201700	1	WD domain G-beta repeat-containing protein
TGGT1_269770	1	WD domain G-beta repeat-containing protein
TGGT1_202280	1	WD domain G-beta repeat-containing protein
TGGT1_218290	1	WD domain G-beta repeat-containing protein
TGGT1_289550	1	WD domain G-beta repeat-containing protein
TGGT1_209520	1	WD domain G-beta repeat-containing protein
TGGT1_221890	1	WD domain G-beta repeat-containing protein
TGGT1_262650	1	WD domain G-beta repeat-containing protein
TGGT1_248290	1	WD domain G-beta repeat-containing protein
TGGT1_209300	1	WD domain G-beta repeat-containing protein
TGGT1_272040	1	WD domain G-beta repeat-containing protein
TGGT1_243540	1	WD domain G-beta repeat-containing protein
TGGT1_204510	1	WD domain G-beta repeat-containing protein
TGGT1_310910	1	WD domain G-beta repeat-containing protein
TGGT1_278280	1	WD domain G-beta repeat-containing protein
TGGT1_257560	1	WD domain G-beta repeat-containing protein
TGGT1_311400	1	WD domain G-beta repeat-containing protein
TGGT1_242610	1	WD domain G-beta repeat-containing protein
TGGT1_315140	1	WD domain G-beta repeat-containing protein
TGGT1_201710	1	WD domain G-beta repeat-containing protein
TGGT1_258520	1	WD domain G-beta repeat-containing protein
TGGT1_255870	1	WD domain G-beta repeat-containing protein
TGGT1_218420	1	WD domain G-beta repeat-containing protein
TGGT1_310310	1	WD domain G-beta repeat-containing protein
TGGT1_228400	1	WD domain G-beta repeat-containing protein
TGGT1_230030	1	WD domain G-beta repeat-containing protein
TGGT1_313280	1	WD domain G-beta repeat-containing protein
TGGT1_273800	1	WD domain G-beta repeat-containing protein
TGGT1_254480	1	WD domain G-beta repeat-containing protein
TGGT1_311870	1	WD domain G-beta repeat-containing protein
TGGT1_268250	1	WD domain G-beta repeat-containing protein
TGGT1_240850	1	WD domain G-beta repeat-containing protein
TGGT1_213710	1	WD domain G-beta repeat-containing protein
TGGT1_227440	1	WD domain G-beta repeat-containing protein
TGGT1_281480	1	WD domain G-beta repeat-containing protein
TGGT1_310410	1	WD domain G-beta repeat-containing protein
TGGT1_214200	1	WD domain G-beta repeat-containing protein
TGGT1_319910	1	WD domain G-beta repeat-containing protein
TGGT1_231280	1	WD domain G-beta repeat-containing protein
TGGT1_262410	1	WD domain G-beta repeat-containing protein
TGGT1_253060	1	WD domain G-beta repeat-containing protein
TGGT1_294250	1	WD domain G-beta repeat-containing protein
TGGT1_293700	1	WD domain G-beta repeat-containing protein
TGGT1_265205	1	WD domain G-beta repeat-containing protein
TGGT1_220160	1	WD domain-containing protein
TGGT1_256865	1	WD repeat domain 35 family protein
TGGT1_290850	1	WD-40 repeat protein
TGGT1_204370	1	WD-40 repeat protein
TGGT1_234610	1	WD-40 repeat protein
TGGT1_216980	1	WDR8 protein isoform 3 family protein
TGGT1_270710	1	WW domain binding protein 11
TGGT1_215440	1	WWE domain-containing protein
TGGT1_273690	1	Wee kinase
TGGT1_305240	1	XPA binding protein 2 family protein
TGGT1_277150	1	XPG N-terminal domain-containing protein
TGGT1_233090	1	XPG N-terminal domain-containing protein
TGGT1_268560	1	XPG N-terminal domain-containing protein
TGGT1_212250	1	XPG N-terminal domain-containing protein
TGGT1_313300	1	YL1 nuclear protein C-terminal domain-containing protein
TGGT1_319730	1	YOU2 family C2C2 zinc finger protein
TGGT1_204070	1	YT521-B family protein
TGGT1_268630	1	YagE family protein
TGGT1_255680	1	YbaK/proline-tRNA ligase associated domain-containing protein
TGGT1_291900	1	Ydr279p family (RNase H2 complex component) protein
TGGT1_293300	1	Yip1 domain-containing protein
TGGT1_311780	1	Zn-containing alcohol dehydrogenase
TGGT1_278490	1	Zn-finger RING domain containing protein
TGGT1_278240	1	Zn-finger in Ran binding protein and others domain-containing protein
TGGT1_250780	1	Zn-finger in ubiquitin-hydrolases domain-containing protein
TGGT1_221320	1	acetyl-CoA carboxylase ACC1
TGGT1_218560	1	acetyl-coA carboxylase ACC2
TGGT1_230060	1	acetyltransferase GNAT family protein
TGGT1_260010	1	acetyltransferase GNAT family protein
TGGT1_305450	1	acetyltransferase GNAT family protein
TGGT1_259070	1	acetyltransferase GNAT family protein
TGGT1_221160	1	acetyltransferase GNAT family protein
TGGT1_228160	1	acid phosphatase
TGGT1_411760	1	actin
TGGT1_258050	1	actin like protein ALP2a
TGGT1_234670	1	actin-like family protein
TGGT1_257710	1	actin-like protein ALP 5
TGGT1_248890	1	actin-like protein ALP3b
TGGT1_221410	1	actin-like protein ALP4
TGGT1_253040	1	actin-related protein ARP4A
TGGT1_244020	1	activator of hsp90 atpase 1 family protein
TGGT1_264080	1	acyl carrier protein ACP
TGGT1_225990	1	acyl transferase domain-containing protein
TGGT1_263710	1	acyl-CoA:cholesterol acyltransferase alpha ACAT1-alpha
TGGT1_232730	1	acyl-CoA:diacylglycerol acyltransferase 1-related enzyme
TGGT1_251550	1	acyl-coa-binding protein
TGGT1_223910	1	acyltransferase domain-containing protein
TGGT1_297640	1	acyltransferase domain-containing protein
TGGT1_270910	1	acyltransferase domain-containing protein
TGGT1_203570	1	acyltransferase domain-containing protein
TGGT1_221940	1	adaptin n terminal region domain-containing protein
TGGT1_221522	1	adaptor complexes medium subunit family protein
TGGT1_230920	1	adaptor complexes medium subunit family protein
TGGT1_215130	1	adaptor-related protein complex 3 sigma 2 subunit
TGGT1_289170	1	adenylate and guanylate cyclase catalytic domain-containing protein
TGGT1_216280	1	adenylate and guanylate cyclase catalytic domain-containing protein
TGGT1_230555	1	adenylate and guanylate cyclase catalytic domain-containing protein
TGGT1_307603	1	adenylate kinase
TGGT1_281970	1	adenylate kinase superfamily protein
TGGT1_258640	1	adenylate kinase superfamily protein
TGGT1_315260	1	alanine dehydrogenase
TGGT1_203500	1	alanine dehydrogenase/pyridine nucleotide transhydrogenase domain-containing protein
TGGT1_218820	1	alba 2
TGGT1_222160	1	aldehyde dehydrogenase
TGGT1_264000	1	aldehyde dehydrogenase
TGGT1_288450	1	aldehyde dehydrogenase (NAD) family protein
TGGT1_208040	1	aldo-keto reductase
TGGT1_281620	1	aldo/keto reductase family oxidoreductase
TGGT1_267450	1	alpha-tubulin suppressor protein
TGGT1_238200	1	alpha/beta hydrolase fold domain-containing protein
TGGT1_248700	1	alveolin domain containing intermediate filament IMC12
TGGT1_253470	1	alveolin domain containing intermediate filament IMC13
TGGT1_222220	1	alveolin domain containing intermediate filament IMC7
TGGT1_221310	1	aminopeptidase N protein
TGGT1_211090	1	aminotransferase class V superfamily protein
TGGT1_203440	1	anaphase-promoting complex subunit APC10
TGGT1_214500	1	ankyrin repeat-containing protein
TGGT1_254510	1	ankyrin repeat-containing protein
TGGT1_320650	1	ankyrin repeat-containing protein
TGGT1_261230	1	ankyrin repeat-containing protein
TGGT1_255510	1	ankyrin repeat-containing protein
TGGT1_216680	1	ankyrin repeat-containing protein
TGGT1_236595	1	ankyrin repeat-containing protein
TGGT1_234510	1	ankyrin repeat-containing protein
TGGT1_209140	1	anti-silencing protein ASF1 family protein
TGGT1_254200	1	anticodon binding domain-containing protein
TGGT1_261070	1	apicoplast triosephosphate translocator APT1
TGGT1_312110	1	apicoplast-associated thioredoxin family protein Atrx1
TGGT1_299990	1	archease family protein
TGGT1_280700	1	arginine decarboxylase
TGGT1_270690	1	arginyl-tRNA synthetase
TGGT1_210840	1	arginyl-tRNA synthetase family protein
TGGT1_212740	1	aromatic amino acid hydrolase AAH2
TGGT1_231190	1	arsenite-activated ATPase family protein
TGGT1_270760	1	asparagine synthase
TGGT1_270510	1	asparaginyl-tRNA synthetase (NOB+tRNA synthase)
TGGT1_248600	1	aspartate aminotransferase
TGGT1_291640	1	aspartate carbamoyltransferase
TGGT1_205420	1	aspartate-semialdehyde dehydrogenase
TGGT1_202530	1	aspartate-tRNA ligase
TGGT1_227090	1	aspartokinase
TGGT1_272510	1	aspartyl protease
TGGT1_201840	1	aspartyl protease ASP1
TGGT1_242720	1	aspartyl protease ASP5
TGGT1_243340	1	atypical MEK-related kinase (incomplete catalytic triad)
TGGT1_260030	1	atypical MEK-related kinase (incomplete catalytic triad)
TGGT1_318770	1	aurora kinase(incomplete catalytic triad)
TGGT1_260640	1	autophagy protein apg9 protein
TGGT1_236990	1	beta-ketoacyl synthase N-terminal domain-containing protein
TGGT1_230450	1	bifunctional GMP synthase/glutamine amidotransferase protein
TGGT1_249180	1	bifunctional dihydrofolate reductase-thymidylate synthase
TGGT1_271350	1	bifunctional protein FolC subfamily protein
TGGT1_269600	1	biotin-requiring enzyme domain-containing protein
TGGT1_235880	1	brain protein 44 family protein
TGGT1_310380	1	brix domain containing protein
TGGT1_273840	1	brix domain-containing protein
TGGT1_222000	1	brix domain-containing protein
TGGT1_232520	1	brix domain-containing protein
TGGT1_214240	1	bromodomain-containing protein
TGGT1_264640	1	bromodomain-containing protein
TGGT1_306460	1	bromodomain-containing protein
TGGT1_263580	1	bromodomain-containing protein
TGGT1_258990	1	bromodomain-containing protein
TGGT1_264710	1	bucentaur or craniofacial development domain-containing protein
TGGT1_238240	1	bystin protein
TGGT1_254750	1	c3orf15 protein
TGGT1_215670	1	cAMP-dependent protein kinase
TGGT1_244380	1	cactin
TGGT1_315540	1	calcium binding egf domain-containing protein
TGGT1_315550	1	calcium binding egf domain-containing protein
TGGT1_318540	1	calcium binding egf domain-containing protein
TGGT1_292055	1	calcium dependent protein kinase CDPK8
TGGT1_240390	1	calcium-dependent protein kinase
TGGT1_206590	1	calcium-dependent protein kinase CDPK2A
TGGT1_237890	1	calcium-dependent protein kinase CDPK4
TGGT1_233770B	1	calcium-translocating P-type ATPase PMCA-type protein
TGGT1_310320	1	calreticulin family protein
TGGT1_215260	1	carbamoylphosphate synthetase
TGGT1_258160	1	carbohydrate kinase
TGGT1_259950	1	carbonate dehydratase eukaryotic-type domain-containing protein
TGGT1_235650	1	carrier superfamily protein
TGGT1_208560	1	carrier superfamily protein
TGGT1_277090	1	carrier superfamily protein
TGGT1_248950	1	carrier superfamily protein
TGGT1_202880	1	carrier superfamily protein
TGGT1_314710	1	carrier superfamily protein
TGGT1_272400	1	casein kinase ii regulatory subunit protein
TGGT1_321530	1	cathepsin CPL
TGGT1_304450	1	cation-transporting ATPase
TGGT1_221490	1	cell cycle regulator protein
TGGT1_230710	1	cell division protein CDC48
TGGT1_321640	1	cell division protein CDC48AP
TGGT1_237490	1	centrin family protein
TGGT1_273960	1	chaperonin GroS protein
TGGT1_311720	1	chaperonin protein BiP
TGGT1_230590	1	chitobiosyldiphosphodolichol beta-mannosyltransferase
TGGT1_290330	1	chloride transporter chloride channel (ClC) family protein
TGGT1_265500	1	chloride transporter chloride channel (ClC) family protein
TGGT1_258240	1	chromodomain helicase DNA binding protein CHD1/SWI2/SNF2
TGGT1_268810	1	ck2 beta subunit
TGGT1_280550	1	clathrin adaptor complex small chain subfamily protein
TGGT1_285200	1	cleavage and polyadenylation specifity factor protein
TGGT1_299110	1	cleft lip and palate transmembrane protein 1 (clptm1) protein
TGGT1_205240	1	cleft lip and palate transmembrane protein 1 (clptm1) protein
TGGT1_321360	1	clustered-asparagine-rich protein
TGGT1_265220	1	co-chaperone GrpE protein
TGGT1_267470	1	cold-shock DNA-binding domain-containing protein
TGGT1_320600	1	cold-shock DNA-binding domain-containing protein
TGGT1_223020	1	coproporphyrinogen III oxidase
TGGT1_305340	1	corepressor complex CRC230
TGGT1_263245	1	cpw-wpc domain-containing protein
TGGT1_240480	1	cpw-wpc domain-containing protein
TGGT1_266770	1	cpw-wpc domain-containing protein
TGGT1_318500	1	cpw-wpc domain-containing protein
TGGT1_247310	1	cpw-wpc domain-containing protein
TGGT1_261600	1	creatinase domain-containing protein
TGGT1_316660	1	cullin family protein
TGGT1_289310	1	cullin family protein
TGGT1_282140	1	cwf21 protein
TGGT1_235350	1	cwfj family protein
TGGT1_311300	1	cyclic nucleotide-binding domain-containing protein
TGGT1_204440	1	cyclic nucleotide-binding domain-containing protein
TGGT1_204472	1	cyclic nucleotide-binding domain-containing protein
TGGT1_266900	1	cyclin N-terminal domain-containing protein
TGGT1_305330	1	cyclin N-terminal domain-containing protein
TGGT1_290020	1	cyclin dependent kinase binding protein
TGGT1_260250	1	cyclin domain protein cyclin H family protein
TGGT1_293280	1	cyclin protein
TGGT1_285160	1	cyclin-dependent kinase family 5 protein
TGGT1_219100	1	cyclin-dependent kinase regulatory subunit protein
TGGT1_220440	1	cyclin-dependent kinase regulatory subunit protein
TGGT1_219832	1	cyclin-dependent kinase regulatory subunit protein
TGGT1_223120	1	cyclin-dependent kinase regulatory subunit protein
TGGT1_221210	1	cyclophilin
TGGT1_205700	1	cyclophilin precursor
TGGT1_244406	1	cysteine dioxygenase type i protein
TGGT1_215750	1	cytidine and deoxycytidylate deaminase zinc-binding region domain-containing protein
TGGT1_200430	1	cytidine and deoxycytidylate deaminase zinc-binding region domain-containing protein
TGGT1_240770	1	cytochrome b5 family heme/steroid binding domain-containing protein
TGGT1_276110	1	cytochrome b5 family heme/steroid binding domain-containing protein
TGGT1_313580	1	cytochrome b5 family heme/steroid binding domain-containing protein
TGGT1_216900	1	cytokine induced apoptosis inhibitor 1 family protein
TGGT1_277510	1	cytoplasmic dynein intermediate chain
TGGT1_219540	1	cytosolic tRNA-Ala synthetase
TGGT1_239490	1	dehydrogenase E1 component family protein
TGGT1_268900	1	dense granular protein GRA10
TGGT1_297880	1	dense granule protein DG32
TGGT1_237800	1	dense granule protein GRA11
TGGT1_212410	1	dense granule protein GRA11
TGGT1_288650	1	dense granule protein GRA12
TGGT1_275850	1	dense granule protein GRA12
TGGT1_239740	1	dense granule protein GRA14
TGGT1_275470	1	dense granule protein GRA15
TGGT1_227280	1	dense granule protein GRA3
TGGT1_310780	1	dense granule protein GRA4
TGGT1_286450	1	dense granule protein GRA5
TGGT1_222170	1	dense-granule antigen DG32
TGGT1_235620	1	deoxyhypusine synthase
TGGT1_318750	1	deoxyribose-phosphate aldolase
TGGT1_270650	1	deoxyribose-phosphate aldolase
TGGT1_226370	1	dgat2l1-prov protein
TGGT1_259830	1	diacylglycerol kinase catalytic domain-containing protein
TGGT1_320120	1	diadenosine tetraphosphatase family protein
TGGT1_278740	1	diaminopimelate decarboxylase
TGGT1_243680	1	dihydrodipicolinate reductase
TGGT1_242300	1	dihydrodipicolinate synthase
TGGT1_219550	1	dihydrolipoyllysine-residue succinyltransferase component of oxoglutarate dehydrogenase
TGGT1_293610	1	dihydroorotase
TGGT1_259550	1	dihydropteroate synthase
TGGT1_272570	1	dihydrouridine synthase (dus) protein
TGGT1_202790	1	dihydrouridine synthase (dus) protein
TGGT1_280780	1	dihydrouridine synthase (dus) protein
TGGT1_300320	1	dimethyladenosine transferase
TGGT1_245500	1	dipeptidyl peptidase iv (dpp iv) n-terminal region domain-containing protein
TGGT1_261060	1	diphthamide biosynthesis protein 2-related domain-containing protein
TGGT1_411630	1	disulfide-isomerase domain protein
TGGT1_224910	1	divalent cation tolerance protein CutA1 family protein
TGGT1_271170	1	dolichol kinase
TGGT1_203970	1	dolichyl-diphosphooligosaccharide--protein glycosyltransferase
TGGT1_235930	1	domain K- type RNA binding proteins family protein
TGGT1_221500	1	dual specificity phosphatase catalytic domain-containing protein
TGGT1_311335	1	dual specificity phosphatase catalytic domain-containing protein
TGGT1_268770	1	dual specificity phosphatase catalytic domain-containing protein
TGGT1_235890	1	dual-specificity protein phosphatase
TGGT1_267800	1	dynamin-related protein DRPA
TGGT1_235920	1	dynein axonemal heavy chain 2 family protein
TGGT1_294550	1	dynein heavy chain
TGGT1_261022	1	dynein heavy chain family protein
TGGT1_309980	1	dynein heavy chain family protein
TGGT1_203135	1	dynein heavy chain family protein
TGGT1_263030	1	dynein light chain 8 family E protein
TGGT1_229630	1	eIF2 kinase IF2K-A (incomplete catalytic triad)
TGGT1_311510	1	eIF2 kinase IF2K-B
TGGT1_204100	1	eIF2 kinase IF2K-C
TGGT1_204110	1	eIF2 kinase IF2K-C
TGGT1_204090	1	eIF2 kinase IF2K-C
TGGT1_265230	1	electron transfer flavoprotein-ubiquinone oxidoreductase
TGGT1_359490	1	elongation factor 1-alpha
TGGT1_286080	1	elongation factor 2 family protein
TGGT1_218790	1	elongation factor G C-terminus domain-containing protein
TGGT1_209010	1	elongation factor TS protein
TGGT1_268710	1	elongation factor Tu GTP binding domain-containing protein
TGGT1_216960	1	elongation factor Tu GTP binding domain-containing protein
TGGT1_228350	1	elongation factor Tu GTP binding domain-containing protein
TGGT1_278550	1	elongation factor Tu GTP binding domain-containing protein
TGGT1_222070	1	elongation factor Tu GTP binding domain-containing protein
TGGT1_228250	1	elongation factor Tu GTP binding domain-containing protein
TGGT1_301380	1	elongation factor Tu GTP binding domain-containing protein
TGGT1_258380	1	elongation factor p (ef-p) kow family domain-containing protein
TGGT1_310750	1	emp24/gp25L/p24 family protein
TGGT1_254350	1	endo-1%2C3(4)-beta-glucanase
TGGT1_283730	1	endomembrane protein 70 subfamily protein
TGGT1_305920	1	endonuclease III family 1 protein
TGGT1_288680	1	endonuclease IV APN
TGGT1_232310	1	endonuclease/exonuclease/phosphatase family protein
TGGT1_249030	1	endonuclease/exonuclease/phosphatase family protein
TGGT1_243590	1	endonuclease/exonuclease/phosphatase family protein
TGGT1_301216	1	endonuclease/exonuclease/phosphatase family protein
TGGT1_254740	1	endoribonuclease L-PSP protein
TGGT1_268860	1	enolase 1
TGGT1_268850	1	enolase 2
TGGT1_202140	1	enoyl-CoA hydratase/isomerase family protein
TGGT1_294190	1	enoyl-CoA hydratase/isomerase family protein
TGGT1_251930	1	enoyl-acyl carrier reductase ENR
TGGT1_214760	1	erythronate-4-phosphate dehydrogenase domain-containing protein
TGGT1_261530	1	eukaryotic aspartyl protease superfamily protein
TGGT1_226800	1	eukaryotic glutathione synthase atp binding domain-containing protein
TGGT1_281545	1	eukaryotic initiation factor 3 gamma subunit protein
TGGT1_313230	1	eukaryotic initiation factor-2 alpha subunit
TGGT1_273460	1	eukaryotic translation initiation factor 3 subunit 6 interacting protein
TGGT1_237020	1	exonuclease
TGGT1_295060	1	exonuclease
TGGT1_216600	1	exonuclease III APE
TGGT1_214320	1	facilitative glucose transporter GT1
TGGT1_242380	1	fatty acid elongase
TGGT1_215070	1	ferodoxin FD
TGGT1_298990	1	ferredoxin NADP+ oxidoreductase FNR
TGGT1_311430	1	fibrillarin
TGGT1_224040	1	flagellar associated protein
TGGT1_284670	1	flagellar associated protein
TGGT1_264178A	1	flagellar associated protein
TGGT1_258530	1	flagellar associated protein
TGGT1_310480	1	flagellar/basal body protein PACRG family protein
TGGT1_249320	1	flavodoxin domain-containing protein
TGGT1_242880	1	flavoprotein
TGGT1_215590	1	flavoprotein subunit of succinate dehydrogenase
TGGT1_267560	1	folate-binding protein YgfZ protein
TGGT1_260220	1	folate/biopterin transporter subfamily protein
TGGT1_292110	1	formate/nitrite transporter protein
TGGT1_209800	1	formate/nitrite transporter protein
TGGT1_229170	1	formate/nitrite transporter protein
TGGT1_206430	1	formin FRM1
TGGT1_206580	1	formin FRM2
TGGT1_462965	1	formin domain-containing protein
TGGT1_235640	1	formyl transferase domain-containing protein
TGGT1_236040	1	fructose-1%2C6-bisphosphate aldolase
TGGT1_205380	1	fructose-bisphospatase I
TGGT1_247510	1	fructose-bisphospatase II
TGGT1_267330	1	fumarate hydratase
TGGT1_307770	1	fumble protein
TGGT1_261630	1	gamma interferon inducible lysosomal thiol reductase (GILT) protein
TGGT1_243350	1	gamma-glutamyl hydrolase
TGGT1_231010	1	general transcription factor IIE polypeptide 1 GTF2E1
TGGT1_294920	1	general transcription factor IIH polypeptide 2 GTF2H2
TGGT1_214520	1	general transcription factor IIH polypeptide 4 GTF2H4
TGGT1_217450	1	general transcription factor IIH polypeptide 5 GTF2H5
TGGT1_231350	1	glucosamine-fructose-6-phosphate aminotransferase
TGGT1_242010	1	glucose inhibited division protein A subfamily protein
TGGT1_294200	1	glucose-6-phosphate 1-dehydrogenase
TGGT1_283780	1	glucose-6-phosphate isomerase GPI
TGGT1_285980B	1	glucosephosphate-mutase GPM1
TGGT1_285980A	1	glucosephosphate-mutase GPM1
TGGT1_318580	1	glucosephosphate-mutase GPM2
TGGT1_265010	1	glutamate 5-kinase domain-containing protein
TGGT1_232590	1	glutamate-cysteine ligase catalytic subunit domain-containing protein
TGGT1_263870	1	glutamate-tRNA ligase
TGGT1_249390	1	glutamate/leucine/phenylalanine/valine dehydrogenase family protein
TGGT1_247580	1	glutaredoxin domain-containing protein
TGGT1_238070	1	glutaredoxin domain-containing protein
TGGT1_268730	1	glutaredoxin-related protein
TGGT1_249630	1	glutathione S-transferase N-terminal domain-containing protein
TGGT1_246920	1	glutathione reductase
TGGT1_306030	1	glutathione s-transferase n-terminal domain containing protein
TGGT1_289690	1	glyceraldehyde-3-phosphate dehydrogenase GAPDH1
TGGT1_269190	1	glyceraldehyde-3-phosphate dehydrogenase GAPDH2
TGGT1_244150	1	glycerate kinase
TGGT1_263270	1	glycerophosphodiester phosphodiesterase family protein
TGGT1_256090	1	glycerophosphodiester phosphodiesterase family protein
TGGT1_202960	1	glycine cleavage H-protein
TGGT1_283820	1	glycine cleavage T-protein (aminomethyl transferase) domain-containing protein
TGGT1_237470	1	glycine cleavage T-protein (aminomethyl transferase) domain-containing protein
TGGT1_214790	1	glycoprotein
TGGT1_320588	1	glycosyl hydrolases family 35 protein
TGGT1_318730	1	glycosyl transferase
TGGT1_310400	1	glycosyl transferase family 8 protein
TGGT1_244520	1	glycosyl transferase group 4 family protein
TGGT1_209960	1	glycosyltransferase
TGGT1_268340	1	glycosyltransferase family 28 C-terminal domain-containing protein
TGGT1_227790	1	glycosyltransferase group 1 family protein
TGGT1_256080	1	glycosyltransferase group 2 family protein
TGGT1_260650	1	glycosyltransferase group 2 family protein
TGGT1_256990	1	glycyl-tRNA synthetase
TGGT1_240430	1	glyoxalase family protein
TGGT1_216880	1	guanine nucleotide-binding protein
TGGT1_242730	1	guanylate kinase family protein
TGGT1_304990	1	guanylate-binding protein N-terminal domain-containing protein
TGGT1_286720	1	heat shock protein HSP28
TGGT1_247550	1	heat shock protein HSP60
TGGT1_273760	1	heat shock protein HSP70
TGGT1_288380	1	heat shock protein HSP90
TGGT1_216950	1	helicase
TGGT1_318440	1	helicase associated domain (ha2) protein
TGGT1_260200	1	helicase associated domain (ha2) protein
TGGT1_295070	1	helicase associated domain (ha2) protein
TGGT1_285490	1	helix-hairpin-helix motif domain-containing protein
TGGT1_241160	1	hemolysin-III related subfamily protein
TGGT1_213752	1	herpesviridae ul52/ul70 dna primase
TGGT1_232740	1	hipothetical protein
TGGT1_308950	1	histidine acid phosphatase superfamily protein
TGGT1_232270	1	histidine acid phosphatase superfamily protein
TGGT1_304650	1	histidine acid phosphatase superfamily protein
TGGT1_204080	1	histidine acid phosphatase superfamily protein
TGGT1_225420	1	histidine triad domain-containing protein
TGGT1_218810	1	histidyl-tRNA synthetase
TGGT1_305160	1	histone H2Ba
TGGT1_251870	1	histone H2Bb
TGGT1_276180	1	histone acetyltransferase TAF1/250
TGGT1_232610	1	histone acetyltransferase subunit nua4 protein
TGGT1_219520	1	histone arginine methyltransferase PRMT1
TGGT1_293370	1	histone arginine methyltransferase PRMT2
TGGT1_294270	1	histone arginine methyltransferase PRMT4/CARM1
TGGT1_215560	1	histone arginine methyltransferase PRMT5
TGGT1_267360	1	histone deacetylase
TGGT1_249620	1	histone deacetylase HDAC2
TGGT1_227290	1	histone deacetylase HDAC3
TGGT1_257790	1	histone deacetylase HDAC4
TGGT1_227020	1	histone deacetylase SIR2
TGGT1_227970	1	histone family DNA-binding protein
TGGT1_243440	1	histone lysine acetyltransferase GCN5-B
TGGT1_293380	1	histone lysine acetyltransferase HAT1
TGGT1_318330	1	histone lysine acetyltransferase MYST-A
TGGT1_207080	1	histone lysine acetyltransferase MYST-B
TGGT1_224928	1	histone lysine demethylase JMJD4
TGGT1_212110	1	histone lysine demethylase JMJD5
TGGT1_261260B	1	histone lysine demethylase JMJD6a
TGGT1_261260A	1	histone lysine demethylase JMJD6a
TGGT1_283890	1	histone lysine demethylase JMJD6b
TGGT1_240840	1	histone lysine demethylase JmjC NO66
TGGT1_255970	1	histone lysine methyltransferase SET/SUV39
TGGT1_226810	1	histone lysine methyltransferase SET1
TGGT1_257770	1	histone lysine methyltransferase SET2
TGGT1_211730	1	histone lysine methyltransferase SET8
TGGT1_242415	1	histone lysine-specific demethylase
TGGT1_275420	1	histone lysine-specific demethylase
TGGT1_257750	1	homocysteine s-methyltransferase domain-containing protein
TGGT1_227370	1	hydrolase CocE/NonD family protein
TGGT1_282190	1	hydrolase NUDIX family protein
TGGT1_290900	1	hydrolase NUDIX family protein
TGGT1_214780	1	hydrolase NUDIX family protein
TGGT1_253070	1	hydrolase TatD family protein
TGGT1_261940	1	hydrolase alpha/beta fold family protein
TGGT1_267050	1	hydrolase alpha/beta fold family protein
TGGT1_240830	1	hydrolase alpha/beta fold family protein
TGGT1_230905	1	hydrolase alpha/beta fold family protein
TGGT1_265860	1	hydrolase carbon-nitrogen family protein
TGGT1_281630	1	hydroxyacylglutathione hydrolase
TGGT1_260000	1	hypothetical protein
TGGT1_268835	1	hypothetical protein
TGGT1_268820	1	hypothetical protein
TGGT1_318640	1	hypothetical protein
TGGT1_411310	1	hypothetical protein
TGGT1_269075	1	hypothetical protein
TGGT1_411300	1	hypothetical protein
TGGT1_268800	1	hypothetical protein
TGGT1_268780	1	hypothetical protein
TGGT1_259280	1	hypothetical protein
TGGT1_268740	1	hypothetical protein
TGGT1_411270	1	hypothetical protein
TGGT1_318632	1	hypothetical protein
TGGT1_259580	1	hypothetical protein
TGGT1_316370	1	hypothetical protein
TGGT1_259600	1	hypothetical protein
TGGT1_319300	1	hypothetical protein
TGGT1_268790	1	hypothetical protein
TGGT1_411500	1	hypothetical protein
TGGT1_269130	1	hypothetical protein
TGGT1_260020	1	hypothetical protein
TGGT1_269060	1	hypothetical protein
TGGT1_269020	1	hypothetical protein
TGGT1_269085	1	hypothetical protein
TGGT1_269015	1	hypothetical protein
TGGT1_411650	1	hypothetical protein
TGGT1_259190	1	hypothetical protein
TGGT1_411540	1	hypothetical protein
TGGT1_267435	1	hypothetical protein
TGGT1_316235	1	hypothetical protein
TGGT1_318742	1	hypothetical protein
TGGT1_411390	1	hypothetical protein
TGGT1_410910	1	hypothetical protein
TGGT1_268990	1	hypothetical protein
TGGT1_411520	1	hypothetical protein
TGGT1_410970	1	hypothetical protein
TGGT1_316240	1	hypothetical protein
TGGT1_316180	1	hypothetical protein
TGGT1_316350	1	hypothetical protein
TGGT1_268950	1	hypothetical protein
TGGT1_318738	1	hypothetical protein
TGGT1_411440	1	hypothetical protein
TGGT1_318760	1	hypothetical protein
TGGT1_411400	1	hypothetical protein
TGGT1_269100	1	hypothetical protein
TGGT1_316470	1	hypothetical protein
TGGT1_316550	1	hypothetical protein
TGGT1_410990	1	hypothetical protein
TGGT1_267590	1	hypothetical protein
TGGT1_268230	1	hypothetical protein
TGGT1_268225	1	hypothetical protein
TGGT1_268220	1	hypothetical protein
TGGT1_317830	1	hypothetical protein
TGGT1_411190	1	hypothetical protein
TGGT1_268190	1	hypothetical protein
TGGT1_268178	1	hypothetical protein
TGGT1_268035	1	hypothetical protein
TGGT1_259860	1	hypothetical protein
TGGT1_318340	1	hypothetical protein
TGGT1_411150	1	hypothetical protein
TGGT1_268010	1	hypothetical protein
TGGT1_318120	1	hypothetical protein
TGGT1_267980	1	hypothetical protein
TGGT1_267960	1	hypothetical protein
TGGT1_267690	1	hypothetical protein
TGGT1_267855	1	hypothetical protein
TGGT1_259870	1	hypothetical protein
TGGT1_259880	1	hypothetical protein
TGGT1_318210	1	hypothetical protein
TGGT1_267790	1	hypothetical protein
TGGT1_267700	1	hypothetical protein
TGGT1_267775	1	hypothetical protein
TGGT1_267750	1	hypothetical protein
TGGT1_267740	1	hypothetical protein
TGGT1_318290	1	hypothetical protein
TGGT1_267730	1	hypothetical protein
TGGT1_318300	1	hypothetical protein
TGGT1_267570	1	hypothetical protein
TGGT1_318360	1	hypothetical protein
TGGT1_317820	1	hypothetical protein
TGGT1_268260	1	hypothetical protein
TGGT1_411230	1	hypothetical protein
TGGT1_316490	1	hypothetical protein
TGGT1_411220	1	hypothetical protein
TGGT1_411020	1	hypothetical protein
TGGT1_316510	1	hypothetical protein
TGGT1_268610	1	hypothetical protein
TGGT1_267725	1	hypothetical protein
TGGT1_268580	1	hypothetical protein
TGGT1_411080	1	hypothetical protein
TGGT1_316570A	1	hypothetical protein
TGGT1_268400	1	hypothetical protein
TGGT1_268390	1	hypothetical protein
TGGT1_259610	1	hypothetical protein
TGGT1_318490	1	hypothetical protein
TGGT1_268690	1	hypothetical protein
TGGT1_316570B	1	hypothetical protein
TGGT1_267530	1	hypothetical protein
TGGT1_318400	1	hypothetical protein
TGGT1_268330	1	hypothetical protein
TGGT1_259840	1	hypothetical protein
TGGT1_268320	1	hypothetical protein
TGGT1_259900	1	hypothetical protein
TGGT1_268300	1	hypothetical protein
TGGT1_269175	1	hypothetical protein
TGGT1_259850	1	hypothetical protein
TGGT1_316760	1	hypothetical protein
TGGT1_318390	1	hypothetical protein
TGGT1_268270	1	hypothetical protein
TGGT1_316890	1	hypothetical protein
TGGT1_318380	1	hypothetical protein
TGGT1_268350	1	hypothetical protein
TGGT1_316580	1	hypothetical protein
TGGT1_365840	1	hypothetical protein
TGGT1_315970	1	hypothetical protein
TGGT1_271080	1	hypothetical protein
TGGT1_314482	1	hypothetical protein
TGGT1_271110	1	hypothetical protein
TGGT1_271145	1	hypothetical protein
TGGT1_259030	1	hypothetical protein
TGGT1_259000	1	hypothetical protein
TGGT1_271174	1	hypothetical protein
TGGT1_411870	1	hypothetical protein
TGGT1_271178	1	hypothetical protein
TGGT1_314480	1	hypothetical protein
TGGT1_314470	1	hypothetical protein
TGGT1_271290	1	hypothetical protein
TGGT1_314460	1	hypothetical protein
TGGT1_271310	1	hypothetical protein
TGGT1_462961	1	hypothetical protein
TGGT1_271070	1	hypothetical protein
TGGT1_314485	1	hypothetical protein
TGGT1_271025	1	hypothetical protein
TGGT1_259050	1	hypothetical protein
TGGT1_314690	1	hypothetical protein
TGGT1_314680	1	hypothetical protein
TGGT1_270790	1	hypothetical protein
TGGT1_314670	1	hypothetical protein
TGGT1_270810	1	hypothetical protein
TGGT1_270820	1	hypothetical protein
TGGT1_314570	1	hypothetical protein
TGGT1_314390	1	hypothetical protein
TGGT1_314550	1	hypothetical protein
TGGT1_270925	1	hypothetical protein
TGGT1_314490	1	hypothetical protein
TGGT1_270930	1	hypothetical protein
TGGT1_270960	1	hypothetical protein
TGGT1_314487	1	hypothetical protein
TGGT1_271010	1	hypothetical protein
TGGT1_271015	1	hypothetical protein
TGGT1_314515	1	hypothetical protein
TGGT1_271320	1	hypothetical protein
TGGT1_314370	1	hypothetical protein
TGGT1_258980	1	hypothetical protein
TGGT1_258850	1	hypothetical protein
TGGT1_313750	1	hypothetical protein
TGGT1_313725	1	hypothetical protein
TGGT1_271850	1	hypothetical protein
TGGT1_271892	1	hypothetical protein
TGGT1_271920	1	hypothetical protein
TGGT1_258826	1	hypothetical protein
TGGT1_313770	1	hypothetical protein
TGGT1_271950	1	hypothetical protein
TGGT1_272020	1	hypothetical protein
TGGT1_313700	1	hypothetical protein
TGGT1_258760	1	hypothetical protein
TGGT1_272155	1	hypothetical protein
TGGT1_313677	1	hypothetical protein
TGGT1_313665	1	hypothetical protein
TGGT1_272210	1	hypothetical protein
TGGT1_271985	1	hypothetical protein
TGGT1_314715	1	hypothetical protein
TGGT1_271740	1	hypothetical protein
TGGT1_258920	1	hypothetical protein
TGGT1_271335	1	hypothetical protein
TGGT1_314320	1	hypothetical protein
TGGT1_314310	1	hypothetical protein
TGGT1_314267	1	hypothetical protein
TGGT1_271360	1	hypothetical protein
TGGT1_271370	1	hypothetical protein
TGGT1_314080	1	hypothetical protein
TGGT1_313775	1	hypothetical protein
TGGT1_258970	1	hypothetical protein
TGGT1_271400	1	hypothetical protein
TGGT1_271410	1	hypothetical protein
TGGT1_314030	1	hypothetical protein
TGGT1_271470	1	hypothetical protein
TGGT1_314020	1	hypothetical protein
TGGT1_313840	1	hypothetical protein
TGGT1_271600	1	hypothetical protein
TGGT1_271390	1	hypothetical protein
TGGT1_316140	1	hypothetical protein
TGGT1_314750	1	hypothetical protein
TGGT1_314885	1	hypothetical protein
TGGT1_269630	1	hypothetical protein
TGGT1_269640	1	hypothetical protein
TGGT1_259150	1	hypothetical protein
TGGT1_315802	1	hypothetical protein
TGGT1_315715	1	hypothetical protein
TGGT1_269670	1	hypothetical protein
TGGT1_315700	1	hypothetical protein
TGGT1_269705	1	hypothetical protein
TGGT1_269710	1	hypothetical protein
TGGT1_269720	1	hypothetical protein
TGGT1_315660	1	hypothetical protein
TGGT1_315630	1	hypothetical protein
TGGT1_315530	1	hypothetical protein
TGGT1_259140	1	hypothetical protein
TGGT1_315450	1	hypothetical protein
TGGT1_269620	1	hypothetical protein
TGGT1_315855	1	hypothetical protein
TGGT1_259160	1	hypothetical protein
TGGT1_269588	1	hypothetical protein
TGGT1_269260	1	hypothetical protein
TGGT1_411720	1	hypothetical protein
TGGT1_269290	1	hypothetical protein
TGGT1_269320	1	hypothetical protein
TGGT1_269350	1	hypothetical protein
TGGT1_269365	1	hypothetical protein
TGGT1_259172	1	hypothetical protein
TGGT1_315440	1	hypothetical protein
TGGT1_259168	1	hypothetical protein
TGGT1_269410	1	hypothetical protein
TGGT1_315962	1	hypothetical protein
TGGT1_315910	1	hypothetical protein
TGGT1_269413	1	hypothetical protein
TGGT1_315900	1	hypothetical protein
TGGT1_269450	1	hypothetical protein
TGGT1_410890	1	hypothetical protein
TGGT1_269380	1	hypothetical protein
TGGT1_315420	1	hypothetical protein
TGGT1_269950	1	hypothetical protein
TGGT1_315310	1	hypothetical protein
TGGT1_270610	1	hypothetical protein
TGGT1_315120	1	hypothetical protein
TGGT1_259100	1	hypothetical protein
TGGT1_270630	1	hypothetical protein
TGGT1_259080	1	hypothetical protein
TGGT1_270655	1	hypothetical protein
TGGT1_270660	1	hypothetical protein
TGGT1_315123	1	hypothetical protein
TGGT1_270670	1	hypothetical protein
TGGT1_411840	1	hypothetical protein
TGGT1_270700	1	hypothetical protein
TGGT1_315090	1	hypothetical protein
TGGT1_270720	1	hypothetical protein
TGGT1_315080	1	hypothetical protein
TGGT1_314920	1	hypothetical protein
TGGT1_270750	1	hypothetical protein
TGGT1_315100	1	hypothetical protein
TGGT1_314800	1	hypothetical protein
TGGT1_270570	1	hypothetical protein
TGGT1_315230	1	hypothetical protein
TGGT1_411730	1	hypothetical protein
TGGT1_270010	1	hypothetical protein
TGGT1_270040	1	hypothetical protein
TGGT1_270060	1	hypothetical protein
TGGT1_270080	1	hypothetical protein
TGGT1_411750	1	hypothetical protein
TGGT1_270090	1	hypothetical protein
TGGT1_270520	1	hypothetical protein
TGGT1_270150	1	hypothetical protein
TGGT1_270220	1	hypothetical protein
TGGT1_270270	1	hypothetical protein
TGGT1_270273	1	hypothetical protein
TGGT1_270280	1	hypothetical protein
TGGT1_270360	1	hypothetical protein
TGGT1_411800	1	hypothetical protein
TGGT1_315270	1	hypothetical protein
TGGT1_270160	1	hypothetical protein
TGGT1_410850	1	hypothetical protein
TGGT1_319590	1	hypothetical protein
TGGT1_260160	1	hypothetical protein
TGGT1_408620	1	hypothetical protein
TGGT1_263440	1	hypothetical protein
TGGT1_263450	1	hypothetical protein
TGGT1_408630	1	hypothetical protein
TGGT1_263460	1	hypothetical protein
TGGT1_408790	1	hypothetical protein
TGGT1_263560	1	hypothetical protein
TGGT1_329600	1	hypothetical protein
TGGT1_323320	1	hypothetical protein
TGGT1_263610	1	hypothetical protein
TGGT1_323310	1	hypothetical protein
TGGT1_263633	1	hypothetical protein
TGGT1_322300	1	hypothetical protein
TGGT1_263637	1	hypothetical protein
TGGT1_263642	1	hypothetical protein
TGGT1_263400	1	hypothetical protein
TGGT1_263680	1	hypothetical protein
TGGT1_263390	1	hypothetical protein
TGGT1_263280	1	hypothetical protein
TGGT1_356970	1	hypothetical protein
TGGT1_263080	1	hypothetical protein
TGGT1_263085	1	hypothetical protein
TGGT1_263110	1	hypothetical protein
TGGT1_263135	1	hypothetical protein
TGGT1_263160	1	hypothetical protein
TGGT1_263170	1	hypothetical protein
TGGT1_263230	1	hypothetical protein
TGGT1_356950	1	hypothetical protein
TGGT1_408250	1	hypothetical protein
TGGT1_356780	1	hypothetical protein
TGGT1_263240	1	hypothetical protein
TGGT1_408600	1	hypothetical protein
TGGT1_356030	1	hypothetical protein
TGGT1_329800	1	hypothetical protein
TGGT1_263350	1	hypothetical protein
TGGT1_322110	1	hypothetical protein
TGGT1_321690	1	hypothetical protein
TGGT1_321685	1	hypothetical protein
TGGT1_264110	1	hypothetical protein
TGGT1_321460	1	hypothetical protein
TGGT1_321430	1	hypothetical protein
TGGT1_409030	1	hypothetical protein
TGGT1_321410	1	hypothetical protein
TGGT1_264130	1	hypothetical protein
TGGT1_321390	1	hypothetical protein
TGGT1_264140	1	hypothetical protein
TGGT1_264150	1	hypothetical protein
TGGT1_260990	1	hypothetical protein
TGGT1_264170	1	hypothetical protein
TGGT1_321280	1	hypothetical protein
TGGT1_264175	1	hypothetical protein
TGGT1_260860	1	hypothetical protein
TGGT1_260840	1	hypothetical protein
TGGT1_264100	1	hypothetical protein
TGGT1_264090	1	hypothetical protein
TGGT1_321510	1	hypothetical protein
TGGT1_321520	1	hypothetical protein
TGGT1_321680	1	hypothetical protein
TGGT1_321590	1	hypothetical protein
TGGT1_263750	1	hypothetical protein
TGGT1_261075	1	hypothetical protein
TGGT1_263760	1	hypothetical protein
TGGT1_263800	1	hypothetical protein
TGGT1_408860	1	hypothetical protein
TGGT1_263010	1	hypothetical protein
TGGT1_408930	1	hypothetical protein
TGGT1_321550	1	hypothetical protein
TGGT1_263840	1	hypothetical protein
TGGT1_408980	1	hypothetical protein
TGGT1_263990	1	hypothetical protein
TGGT1_261040	1	hypothetical protein
TGGT1_321540	1	hypothetical protein
TGGT1_264010	1	hypothetical protein
TGGT1_263810	1	hypothetical protein
TGGT1_357100	1	hypothetical protein
TGGT1_358120	1	hypothetical protein
TGGT1_262990	1	hypothetical protein
TGGT1_262080	1	hypothetical protein
TGGT1_362760	1	hypothetical protein
TGGT1_362450	1	hypothetical protein
TGGT1_366510	1	hypothetical protein
TGGT1_261510	1	hypothetical protein
TGGT1_362290	1	hypothetical protein
TGGT1_262090	1	hypothetical protein
TGGT1_262110	1	hypothetical protein
TGGT1_362210	1	hypothetical protein
TGGT1_262125	1	hypothetical protein
TGGT1_262130	1	hypothetical protein
TGGT1_362200	1	hypothetical protein
TGGT1_262160	1	hypothetical protein
TGGT1_366630	1	hypothetical protein
TGGT1_262170	1	hypothetical protein
TGGT1_262060	1	hypothetical protein
TGGT1_363250	1	hypothetical protein
TGGT1_363590	1	hypothetical protein
TGGT1_261610	1	hypothetical protein
TGGT1_261730	1	hypothetical protein
TGGT1_365740	1	hypothetical protein
TGGT1_365480	1	hypothetical protein
TGGT1_261790	1	hypothetical protein
TGGT1_261680	1	hypothetical protein
TGGT1_364330	1	hypothetical protein
TGGT1_363980	1	hypothetical protein
TGGT1_361930	1	hypothetical protein
TGGT1_261660	1	hypothetical protein
TGGT1_261955A	1	hypothetical protein
TGGT1_261955B	1	hypothetical protein
TGGT1_261970	1	hypothetical protein
TGGT1_363620	1	hypothetical protein
TGGT1_261650	1	hypothetical protein
TGGT1_262020	1	hypothetical protein
TGGT1_261620	1	hypothetical protein
TGGT1_363640	1	hypothetical protein
TGGT1_264182	1	hypothetical protein
TGGT1_361480	1	hypothetical protein
TGGT1_361030	1	hypothetical protein
TGGT1_366950	1	hypothetical protein
TGGT1_262660	1	hypothetical protein
TGGT1_262740	1	hypothetical protein
TGGT1_261430	1	hypothetical protein
TGGT1_359210	1	hypothetical protein
TGGT1_261400	1	hypothetical protein
TGGT1_359000	1	hypothetical protein
TGGT1_358510	1	hypothetical protein
TGGT1_262840	1	hypothetical protein
TGGT1_358470	1	hypothetical protein
TGGT1_367020	1	hypothetical protein
TGGT1_262900	1	hypothetical protein
TGGT1_262935	1	hypothetical protein
TGGT1_358300	1	hypothetical protein
TGGT1_262970	1	hypothetical protein
TGGT1_261475	1	hypothetical protein
TGGT1_262655	1	hypothetical protein
TGGT1_359350	1	hypothetical protein
TGGT1_366730	1	hypothetical protein
TGGT1_360740	1	hypothetical protein
TGGT1_360650	1	hypothetical protein
TGGT1_360500	1	hypothetical protein
TGGT1_262450	1	hypothetical protein
TGGT1_360080	1	hypothetical protein
TGGT1_262460	1	hypothetical protein
TGGT1_360050	1	hypothetical protein
TGGT1_361320	1	hypothetical protein
TGGT1_262550	1	hypothetical protein
TGGT1_262560	1	hypothetical protein
TGGT1_262575	1	hypothetical protein
TGGT1_262590	1	hypothetical protein
TGGT1_262600	1	hypothetical protein
TGGT1_262610	1	hypothetical protein
TGGT1_359590	1	hypothetical protein
TGGT1_261490	1	hypothetical protein
TGGT1_359700	1	hypothetical protein
TGGT1_267340	1	hypothetical protein
TGGT1_264190	1	hypothetical protein
TGGT1_264210	1	hypothetical protein
TGGT1_410160	1	hypothetical protein
TGGT1_320015	1	hypothetical protein
TGGT1_320010	1	hypothetical protein
TGGT1_320005	1	hypothetical protein
TGGT1_266150	1	hypothetical protein
TGGT1_266260	1	hypothetical protein
TGGT1_319980	1	hypothetical protein
TGGT1_266290	1	hypothetical protein
TGGT1_266360	1	hypothetical protein
TGGT1_319960	1	hypothetical protein
TGGT1_266372	1	hypothetical protein
TGGT1_266380	1	hypothetical protein
TGGT1_319940	1	hypothetical protein
TGGT1_319930	1	hypothetical protein
TGGT1_266410	1	hypothetical protein
TGGT1_266080	1	hypothetical protein
TGGT1_410250	1	hypothetical protein
TGGT1_410090	1	hypothetical protein
TGGT1_266050	1	hypothetical protein
TGGT1_320160B	1	hypothetical protein
TGGT1_320160A	1	hypothetical protein
TGGT1_265520	1	hypothetical protein
TGGT1_320135	1	hypothetical protein
TGGT1_320130	1	hypothetical protein
TGGT1_260390	1	hypothetical protein
TGGT1_265770	1	hypothetical protein
TGGT1_265810	1	hypothetical protein
TGGT1_320105	1	hypothetical protein
TGGT1_265840	1	hypothetical protein
TGGT1_265850	1	hypothetical protein
TGGT1_320090	1	hypothetical protein
TGGT1_260380	1	hypothetical protein
TGGT1_265990	1	hypothetical protein
TGGT1_266035	1	hypothetical protein
TGGT1_266065	1	hypothetical protein
TGGT1_266470	1	hypothetical protein
TGGT1_266500	1	hypothetical protein
TGGT1_319720	1	hypothetical protein
TGGT1_410610	1	hypothetical protein
TGGT1_410660	1	hypothetical protein
TGGT1_410800	1	hypothetical protein
TGGT1_260230	1	hypothetical protein
TGGT1_267000	1	hypothetical protein
TGGT1_267040	1	hypothetical protein
TGGT1_319370	1	hypothetical protein
TGGT1_319320	1	hypothetical protein
TGGT1_267090	1	hypothetical protein
TGGT1_410810	1	hypothetical protein
TGGT1_260205	1	hypothetical protein
TGGT1_267280	1	hypothetical protein
TGGT1_319312	1	hypothetical protein
TGGT1_319308	1	hypothetical protein
TGGT1_260180	1	hypothetical protein
TGGT1_319380	1	hypothetical protein
TGGT1_319580	1	hypothetical protein
TGGT1_266840	1	hypothetical protein
TGGT1_261690	1	hypothetical protein
TGGT1_266670	1	hypothetical protein
TGGT1_266675	1	hypothetical protein
TGGT1_266680	1	hypothetical protein
TGGT1_410320	1	hypothetical protein
TGGT1_410350	1	hypothetical protein
TGGT1_266690	1	hypothetical protein
TGGT1_319695	1	hypothetical protein
TGGT1_265480	1	hypothetical protein
TGGT1_319690	1	hypothetical protein
TGGT1_410450	1	hypothetical protein
TGGT1_260290	1	hypothetical protein
TGGT1_319670	1	hypothetical protein
TGGT1_410530	1	hypothetical protein
TGGT1_266810	1	hypothetical protein
TGGT1_319630	1	hypothetical protein
TGGT1_260280	1	hypothetical protein
TGGT1_266720	1	hypothetical protein
TGGT1_260400	1	hypothetical protein
TGGT1_265470	1	hypothetical protein
TGGT1_265460	1	hypothetical protein
TGGT1_264680	1	hypothetical protein
TGGT1_320660	1	hypothetical protein
TGGT1_320610	1	hypothetical protein
TGGT1_409150	1	hypothetical protein
TGGT1_264720	1	hypothetical protein
TGGT1_264730	1	hypothetical protein
TGGT1_409250	1	hypothetical protein
TGGT1_409260	1	hypothetical protein
TGGT1_264740	1	hypothetical protein
TGGT1_264745	1	hypothetical protein
TGGT1_264748	1	hypothetical protein
TGGT1_320592	1	hypothetical protein
TGGT1_264770	1	hypothetical protein
TGGT1_264790	1	hypothetical protein
TGGT1_320580	1	hypothetical protein
TGGT1_409050	1	hypothetical protein
TGGT1_320710	1	hypothetical protein
TGGT1_409040	1	hypothetical protein
TGGT1_320715	1	hypothetical protein
TGGT1_264220	1	hypothetical protein
TGGT1_321270	1	hypothetical protein
TGGT1_260830	1	hypothetical protein
TGGT1_264230	1	hypothetical protein
TGGT1_264240	1	hypothetical protein
TGGT1_320780	1	hypothetical protein
TGGT1_264260	1	hypothetical protein
TGGT1_264830	1	hypothetical protein
TGGT1_320760	1	hypothetical protein
TGGT1_264472	1	hypothetical protein
TGGT1_320750	1	hypothetical protein
TGGT1_260810	1	hypothetical protein
TGGT1_260800	1	hypothetical protein
TGGT1_264620	1	hypothetical protein
TGGT1_264630	1	hypothetical protein
TGGT1_320720	1	hypothetical protein
TGGT1_264468	1	hypothetical protein
TGGT1_264200	1	hypothetical protein
TGGT1_320550	1	hypothetical protein
TGGT1_264890	1	hypothetical protein
TGGT1_409990	1	hypothetical protein
TGGT1_410080	1	hypothetical protein
TGGT1_265240	1	hypothetical protein
TGGT1_320410	1	hypothetical protein
TGGT1_320290	1	hypothetical protein
TGGT1_320280	1	hypothetical protein
TGGT1_265260	1	hypothetical protein
TGGT1_265270	1	hypothetical protein
TGGT1_265280	1	hypothetical protein
TGGT1_265290	1	hypothetical protein
TGGT1_265340	1	hypothetical protein
TGGT1_265360	1	hypothetical protein
TGGT1_260410	1	hypothetical protein
TGGT1_320270	1	hypothetical protein
TGGT1_320260	1	hypothetical protein
[truncated: 6,591 more rows]
