# Supplementary material for: A single-parasite transcriptional atlas of Toxoplasma Gondii reveals novel control of antigen expression
Source: eLife journal article supplement (doi:10.7554/elife.54129), 2020-02-17
Supplement: supp [file elife-54129-supp-v1.zip › elife_poa_e54129_Supplementary_file_5.csv]

	fold	log2-fold	p	adjusted-p	max_cluster	abs-log2-fold	product
TGME49_207160	31.917	4.996253	1.9138246424482522e-137	1.524921031143202e-135	P1	4.996253	SAG-related sequence SRS49D
TGME49_207210	23.754492	4.5701284	1.7661790792811207e-189	3.469104303164732e-187	P1	4.5701284	hypothetical protein
TGME49_240930	19.193628	4.2625556	1.9747380418306174e-41	2.326169804923486e-40	P1	4.2625556	MoaC family protein
TGME49_209755	16.407856	4.036315	1.932316598803056e-99	7.846320189178179e-98	P1	4.036315	hypothetical protein
TGME49_207130	16.400467	4.035665	3.7719441877743782e-25	2.829293126993108e-24	P1	4.035665	SAG-related sequence SRS49A
TGME49_268860	16.255222	4.0228314	1.138059571552543e-14	5.5496831070050684e-14	P1	4.0228314	enolase 1
TGME49_278522	14.750484	3.8826904	7.656106027825411e-07	2.1853150223390814e-06	P1	3.8826904	hypothetical protein
TGME49_328800	13.171187	3.7193136	0.02010704077651722	0.031379169696685964	P1	3.7193136	hypothetical protein
TGME49_292275	12.405539	3.6329124	7.15005249478702e-32	6.672855621101788e-31	P1	3.6329124	SAG-related sequence SRS36E
TGME49_272590	11.225452	3.4887016	3.634764493867277e-41	4.251969655845294e-40	P1	3.4887016	hypothetical protein
TGME49_259280	10.646568	3.4123166	0.003720687474546562	0.006638134011411124	P1	3.4123166	hypothetical protein
TGME49_278080	10.494704	3.3915896	7.88078672347156e-144	6.933450486087582e-142	P1	3.3915896	Toxoplasma gondii family A protein
TGME49_259020	10.034703	3.326926	1.411398056681515e-96	5.393967414810894e-95	P1	3.326926	bradyzoite antigen BAG1
TGME49_221550	9.040616	3.1764212	2.920355092053868e-77	7.805480730217396e-76	P1	3.1764212	CMGC kinase MAPK family MEK kinase-related (incomplete catalytic triad)
TGME49_209410	8.0584755	3.0105069	1.3686889624740393e-16	7.458030307777894e-16	P1	3.0105069	hypothetical protein
TGME49_200300	7.7733154	2.95853	3.7515582989544495e-11	1.513164345414006e-10	P1	2.95853	hypothetical protein
TGME49_265100	7.7705383	2.9580145	7.925335756567626e-07	2.2606344410661993e-06	P1	2.9580145	hypothetical protein
TGME49_265255	7.752888	2.9547338	0.0008083544552511111	0.0016140335056857883	P1	2.9547338	hypothetical protein
TGME49_274030	7.6966906	2.9442382	3.940421710071732e-05	9.338047632790643e-05	P1	2.9442382	hypothetical protein
TGME49_318220	7.5197577	2.9106863	0.0012549544913180912	0.002430485125813483	P1	2.9106863	hypothetical protein
TGME49_311370	7.4217167	2.891753	9.684534481360404e-21	6.220196063085169e-20	P1	2.891753	methylmalonate-semialdehyde dehydrogenase [acylating] putative
TGME49_266610	7.207087	2.8494163	1.298292367722972e-15	6.649713364334882e-15	P1	2.8494163	Kazal-type serine protease inhibitor domain-containing protein
TGME49_311755	7.1988316	2.8477628	5.034247657657451e-05	0.00011761896463782803	P1	2.8477628	plasma membrane protein 62D16
TGME49_293800	7.08334	2.8244298	4.8365922926813006e-05	0.00011337734805436099	P1	2.8244298	transmembrane protein 65 putative
TGME49_207140	6.613373	2.7253861	4.8079814427505876e-18	2.7718915539570966e-17	P1	2.7253861	SAG-related sequence SRS49B
TGME49_209300	6.538879	2.7090433	5.357178012600737e-16	2.813851087961805e-15	P1	2.7090433	WD domain G-beta repeat-containing protein
TGME49_312330	6.5287642	2.70681	2.4042347024614652e-257	2.256240699665504e-254	P1	2.70681	hypothetical protein
TGME49_252300	6.4377947	2.6865666	0.01170732059984075	0.01909987054013038	P1	2.6865666	hypothetical protein
TGME49_212075	6.2540174	2.6447833	8.425971293412566e-06	2.1565379861867433e-05	P1	2.6447833	hypothetical protein
TGME49_253790	6.0178213	2.5892413	2.2998271892337046e-83	6.937264442952811e-82	P1	2.5892413	zinc finger (CCCH type) motif-containing protein
TGME49_240470	5.845028	2.54721	4.767734106597513e-30	4.1946127358669366e-29	P1	2.54721	hypothetical protein
TGME49_223430	5.809789	2.5384858	7.247176473922653e-59	1.3306446195380593e-57	P1	2.5384858	hypothetical protein
TGME49_225290	5.7650914	2.5273435	3.662379460143075e-26	2.8456722097855025e-25	P1	2.5273435	GDA1/CD39 (nucleoside phosphatase) family protein
TGME49_253330	5.6921644	2.5089774	2.2262522651604093e-166	2.892757943314587e-164	P1	2.5089774	Rhoptry kinase family protein truncated (incomplete catalytic triad)
TGME49_208730	5.6022797	2.4860141	1.6492767037071072e-195	4.2211487998515843e-193	P1	2.4860141	microneme protein putative
TGME49_207350	5.5265436	2.4663775	1.702788412456841e-39	1.930436366659125e-38	P1	2.4663775	hypothetical protein
TGME49_268930	5.499983	2.459427	0.0050671821932397835	0.008840615741397068	P1	2.459427	hypothetical protein
TGME49_274040	5.376592	2.426692	5.485988636309304e-06	1.4340656150500891e-05	P1	2.426692	hypothetical protein
TGME49_261650	5.3628626	2.4230032	1.5457718398099478e-147	1.4506209954483133e-145	P1	2.4230032	hypothetical protein
TGME49_244335	5.2543254	2.3935056	0.0009333083830824711	0.001846935942716624	P1	2.3935056	hypothetical protein
TGME49_264660	5.193854	2.3768053	6.753998509386009e-283	9.50737856837904e-280	P1	2.3768053	SAG-related sequence SRS44
TGME49_253340	5.14318	2.3626606	7.680173031916852e-05	0.00017555275081886258	P1	2.3626606	hypothetical protein
TGME49_207150	5.0304203	2.330679	3.6280801261172387e-29	3.1172700656344047e-28	P1	2.330679	SAG-related sequence SRS49C
TGME49_250920	4.999545	2.321797	0.014785629339589173	0.023655886607723085	P1	2.321797	tetratricopeptide repeat-containing protein
TGME49_255620	4.97314	2.314157	6.700040010903778e-08	2.0966483116744464e-07	P1	2.314157	B9-C2 domain-containing protein
TGME49_313318	4.965635	2.311978	0.0017612808803195749	0.0033308952788130607	P1	2.311978	hypothetical protein
TGME49_217170	4.9153013	2.2972798	0.0015946441907559073	0.003037520260515199	P1	2.2972798	hypothetical protein
TGME49_265205	4.8784404	2.2864199	4.0333859932687876e-07	1.180387321522806e-06	P1	2.2864199	WD domain G-beta repeat-containing protein
TGME49_231125	4.774448	2.255334	0.0007601871981675017	0.001524344984739487	P1	2.255334	hypothetical protein
TGME49_297450	4.753981	2.2491362	0.00035381258342725205	0.000741882095239963	P1	2.2491362	hypothetical protein
TGME49_309860	4.75327	2.2489204	2.529616778332674e-11	1.0296454607131452e-10	P1	2.2489204	hypothetical protein
TGME49_315520	4.7344484	2.2431965	6.061028529989805e-08	1.905861763376541e-07	P1	2.2431965	calcium binding egf domain-containing protein
TGME49_254320	4.711028	2.236042	0.0053417763176882875	0.009271813148211112	P1	2.236042	hypothetical protein
TGME49_204460	4.6786895	2.2261045	0.0002401168005388333	0.0005155125819397523	P1	2.2261045	hydroxymethylglutaryl-CoA lyase putative
TGME49_281470	4.676841	2.2255342	9.434203220181821e-07	2.6658173435147426e-06	P1	2.2255342	hypothetical protein
TGME49_208380	4.6118307	2.2053394	6.05513699744285e-08	1.9047183270168457e-07	P1	2.2053394	hypothetical protein
TGME49_202020	4.549026	2.1855576	4.584576827001948e-162	5.094912615902429e-160	P1	2.1855576	DnAK-TPR
TGME49_280580	4.538425	2.1821916	1.4397716517525325e-102	6.333495505573901e-101	P1	2.1821916	SAG-related sequence SRS35B
TGME49_293020	4.5102634	2.1732118	0.0024942123074019385	0.004604615770123885	P1	2.1732118	hypothetical protein
TGME49_213840	4.448564	2.1533396	0.028622059657251554	0.043137386842460136	P1	2.1533396	hypothetical protein
TGME49_313322	4.441116	2.1509223	0.019919879980253102	0.03109857787675004	P1	2.1509223	hypothetical protein
TGME49_320105	4.4380107	2.149913	2.452833237197056e-08	7.983286906114195e-08	P1	2.149913	hypothetical protein
TGME49_263270	4.4048734	2.1391006	1.639303605398578e-81	4.790850605950308e-80	P1	2.1391006	glycerophosphodiester phosphodiesterase family protein
TGME49_247850	4.384565	2.1324337	0.0008748572232263294	0.0017394171627517839	P1	2.1324337	hypothetical protein
TGME49_321390	4.298134	2.1037104	6.044861627852847e-08	1.902194534606749e-07	P1	2.1037104	hypothetical protein
TGME49_213480	4.291325	2.1014233	2.314564995141116e-15	1.1698872500874845e-14	P1	2.1014233	hypothetical protein
TGME49_234440	4.2476254	2.0866566	7.144564366784717e-19	4.258503221020728e-18	P1	2.0866566	aminotransferase putative
TGME49_222370	4.247264	2.0865338	2.973887731251986e-105	1.3577003123326633e-103	P1	2.0865338	SAG-related sequence SRS13
TGME49_243470	4.236108	2.0827394	1.8356341797294393e-41	2.165330486312129e-40	P1	2.0827394	hypothetical protein
TGME49_311075	4.2203794	2.0773728	0.0026962923619741697	0.004953858013755457	P1	2.0773728	hypothetical protein
TGME49_213720	4.219359	2.0770237	4.575894414393873e-08	1.4529324896229568e-07	P1	2.0770237	hypothetical protein
TGME49_214160	4.1861467	2.0656228	0.025366901535948946	0.03866609824447298	P1	2.0656228	hypothetical protein
TGME49_217920	4.121178	2.0430567	0.004696386484575563	0.00823110193997203	P1	2.0430567	hypothetical protein
TGME49_256865	4.065329	2.0233722	5.647234702988549e-07	1.6306510872287618e-06	P1	2.0233722	WD repeat domain 35 family protein
TGME49_280430	4.041757	2.0149827	9.741525091145267e-05	0.00021934663001816295	P1	2.0149827	hypothetical protein
TGME49_230602	4.0394144	2.014146	0.0011995348002390965	0.0023317079223980227	P1	2.014146	hypothetical protein
TGME49_284615	4.0383077	2.0137508	0.0003130669410731449	0.0006620338969213275	P1	2.0137508	hypothetical protein
TGME49_276155	3.9563599	1.9841737	2.9169944569615793e-06	7.826218292089423e-06	P1	1.9841737	hypothetical protein
TGME49_288020	3.9452095	1.980102	3.0665990857468365e-06	8.204148203426602e-06	P1	1.980102	hypothetical protein
TGME49_297495	3.9450524	1.9800445	1.980137617789286e-06	5.4193915488815e-06	P1	1.9800445	hypothetical protein
TGME49_260190	3.9399877	1.9781911	3.777390631382496e-34	3.73581279539304e-33	P1	1.9781911	microneme protein MIC13
TGME49_321470	3.9237804	1.9722443	1.088209956909191e-05	2.7485111531265037e-05	P1	1.9722443	SAG-related sequence SRS12D
TGME49_306334	3.9073632	1.9661953	3.8441270433824343e-22	2.6015622602891056e-21	P1	1.9661953	hypothetical protein
TGME49_230598	3.8773644	1.9550763	0.016742713890931262	0.026565651234793434	P1	1.9550763	hypothetical protein
TGME49_280420	3.8763082	1.9546833	0.0034692675014151644	0.0062250761242728875	P1	1.9546833	HEAT repeat-containing protein
TGME49_210990	3.8707058	1.9525967	0.006614946800078589	0.01129824887228792	P1	1.9525967	hypothetical protein
TGME49_223095	3.8542187	1.9464384	2.0365059064978188e-13	9.287434603823206e-13	P1	1.9464384	hypothetical protein
TGME49_268300	3.8238616	1.9350303	1.1294854908623038e-10	4.377987359257925e-10	P1	1.9350303	hypothetical protein
TGME49_269300	3.8128672	1.9308763	1.649507614090879e-05	4.078378603223526e-05	P1	1.9308763	lipase
TGME49_252640	3.8019707	1.9267474	8.683937365699813e-23	5.992200571135672e-22	P1	1.9267474	P-type ATPase PMA1
TGME49_315962	3.7982476	1.925334	0.025464671542332996	0.038801121386711976	P1	1.925334	hypothetical protein
TGME49_318750	3.7896175	1.9220523	3.3784288646755175e-55	5.695451135938009e-54	P1	1.9220523	deoxyribose-phosphate aldolase
TGME49_212275	3.7732515	1.9158083	6.5704218316406104e-24	4.710847435486978e-23	P1	1.9158083	hypothetical protein
TGME49_207865	3.718176	1.894595	4.531539844185212e-17	2.5146771040728187e-16	P1	1.894595	GCC2 and GCC3 domain-containing protein
TGME49_278245	3.7030606	1.8887181	1.4589510867299161e-10	5.601045853873123e-10	P1	1.8887181	hypothetical protein
TGME49_243370	3.698295	1.8868604	9.930006868758883e-05	0.00022329296595723517	P1	1.8868604	hypothetical protein
TGME49_211320	3.697109	1.8863976	0.0005328732406694988	0.0010918601141908266	P1	1.8863976	hypothetical protein
TGME49_275795	3.6960518	1.885985	0.004159402209506841	0.00735251382618141	P1	1.885985	hypothetical protein
TGME49_213880	3.6958258	1.8858968	9.798065324317602e-09	3.2696349162064983e-08	P1	1.8858968	hypothetical protein
TGME49_309830	3.6881986	1.8829163	2.5055301384892375e-08	8.148520427293068e-08	P1	1.8829163	hypothetical protein
TGME49_230130	3.682847	1.8808215	0.030627965488235844	0.04584153757108629	P1	1.8808215	hypothetical protein
TGME49_293790	3.6720912	1.8766019	3.4332159925582795e-16	1.8225607965523087e-15	P1	1.8766019	hypothetical protein
TGME49_286000	3.6712568	1.876274	3.421044748588419e-12	1.4667078145470958e-11	P1	1.876274	hypothetical protein
TGME49_278975	3.663791	1.8733371	2.467298462223626e-37	2.654624562030668e-36	P1	1.8733371	ICE family protease (caspase) p20 domain-containing protein
TGME49_243550	3.6586378	1.8713065	0.0026627640392847024	0.00489651754317409	P1	1.8713065	H-SHIPPO 1 putative
TGME49_207120	3.6133857	1.8533512	4.057360439687231e-15	2.0193557026280703e-14	P1	1.8533512	Sad1/UNC family protein
TGME49_229720	3.6118305	1.8527302	1.0794606031690666e-14	5.27306203260031e-14	P1	1.8527302	hypothetical protein
TGME49_252260	3.5915718	1.8446153	0.00600607632413901	0.010344070276035497	P1	1.8446153	hypothetical protein
TGME49_211370	3.554161	1.829509	9.185894116360102e-09	3.073853474911942e-08	P1	1.829509	tetratricopeptide repeat-containing protein
TGME49_288970	3.542119	1.8246127	6.956892968725789e-05	0.0001597550788848777	P1	1.8246127	hypothetical protein
TGME49_297492	3.5300298	1.8196803	0.023272884619352525	0.035777718146168806	P1	1.8196803	hypothetical protein
TGME49_208740	3.486667	1.8018485	1.2153388968779704e-200	3.5395697665625304e-198	P1	1.8018485	microneme protein putative
TGME49_296640	3.478179	1.7983322	8.061123085211033e-07	2.2970393244835488e-06	P1	1.7983322	SAG-related sequence SRS48E
TGME49_280570	3.4778483	1.798195	6.108924210805762e-195	1.4741706824132989e-192	P1	1.798195	SAG-related sequence SRS35A
TGME49_254430	3.475594	1.7972596	0.00010241707208998744	0.00022975155136043397	P1	1.7972596	microneme protein putative
TGME49_226100	3.4606185	1.7910299	4.0256463880332585e-07	1.1785306548814177e-06	P1	1.7910299	haloacid dehalogenase family hydrolase domain-containing protein
TGME49_289840	3.4508238	1.7869408	8.57310869600439e-124	5.324152650474492e-122	P1	1.7869408	hypothetical protein
TGME49_286740	3.448954	1.7861589	5.812140485959949e-27	4.605003615799036e-26	P1	1.7861589	microneme-like protein
TGME49_264650	3.4455261	1.7847242	1.4568983466873792e-16	7.923350570586996e-16	P1	1.7847242	phosphoacetylglucosamine mutase
TGME49_251857	3.4435954	1.7839156	3.72606518756643e-24	2.6966877955600746e-23	P1	1.7839156	hypothetical protein
TGME49_246763	3.411925	1.770586	1.8342212091901938e-09	6.471107908446273e-09	P1	1.770586	hypothetical protein
TGME49_254060	3.411246	1.7702988	4.792727021293257e-10	1.7676581843599497e-09	P1	1.7702988	SAG-related sequence SRS14A
TGME49_203570	3.3956406	1.7636838	1.2529838456023138e-06	3.499570621678949e-06	P1	1.7636838	acyltransferase domain-containing protein
TGME49_236140	3.3878226	1.7603583	2.2225421768924874e-05	5.40968046859768e-05	P1	1.7603583	hypothetical protein
TGME49_297340	3.385359	1.7593088	5.759258201675296e-147	5.3453510737746755e-145	P1	1.7593088	hypothetical protein
TGME49_288050	3.37607	1.7553449	1.8502954786940844e-11	7.560520373996244e-11	P1	1.7553449	intraflagellar transport protein 172 putative
TGME49_207360	3.3702931	1.7528741	2.9251250726727413e-09	1.0192081833248339e-08	P1	1.7528741	hypothetical protein
TGME49_309865	3.3646631	1.750462	3.080224342301825e-05	7.371939584891248e-05	P1	1.750462	hypothetical protein
TGME49_253920	3.3638294	1.7501045	0.00017195295181759453	0.0003759551206449401	P1	1.7501045	hypothetical protein
TGME49_306630	3.359342	1.7481787	3.015814725772608e-09	1.0490762427461058e-08	P1	1.7481787	tRNA methyltransferase complex GCD14 subunit protein
TGME49_258560	3.344636	1.7418492	0.0016948467620249204	0.0032146139124326245	P1	1.7418492	hypothetical protein
TGME49_202170	3.337604	1.7388128	7.760846401812205e-09	2.6135609533375553e-08	P1	1.7388128	hypothetical protein
TGME49_313665	3.3294544	1.7352858	1.8710662125901115e-07	5.635886316524994e-07	P1	1.7352858	hypothetical protein
TGME49_297710	3.3229032	1.7324443	4.106136565607053e-29	3.524433885479387e-28	P1	1.7324443	hypothetical protein
TGME49_257810	3.3210511	1.7316399	2.743813008219295e-10	1.0336415997957255e-09	P1	1.7316399	hypothetical protein
TGME49_216570	3.286461	1.7165349	0.0002065954977027789	0.00044706778723998733	P1	1.7165349	tRNA-Arg
TGME49_248330	3.2672904	1.7080946	4.525746772641198e-19	2.716734700904588e-18	P1	1.7080946	zinc finger C3HC4 type (RING finger) domain-containing protein
TGME49_235860	3.2672088	1.7080586	0.0004235678402953472	0.0008785496019485517	P1	1.7080586	subtilisin SUB11
TGME49_263280	3.2659488	1.7075021	0.0015001854565600077	0.0028672926829838934	P1	1.7075021	hypothetical protein
TGME49_280725	3.249703	1.7003078	0.0004520762143820892	0.0009349254913494431	P1	1.7003078	hypothetical protein
TGME49_239510	3.2450373	1.698235	1.5500206772225634e-09	5.500619596563769e-09	P1	1.698235	hypothetical protein
TGME49_320730	3.2354312	1.693958	0.0009236116025071993	0.0018290324958442684	P1	1.693958	homoserine O-acetyltransferase putative
TGME49_222385	3.2350433	1.693785	0.005713258700286311	0.009884101389311385	P1	1.693785	hypothetical protein
TGME49_240290	3.2286284	1.6909214	1.652447464195041e-08	5.441158394772443e-08	P1	1.6909214	hypothetical protein
TGME49_272440	3.2089045	1.6820809	2.0763338549113112e-10	7.885213911232434e-10	P1	1.6820809	RNA recognition motif-containing protein
TGME49_293780	3.1994495	1.6778238	4.358660749242986e-90	1.527520692452542e-88	P1	1.6778238	hypothetical protein
TGME49_321460	3.1931424	1.674977	0.02989189638235142	0.044867061817192126	P1	1.674977	hypothetical protein
TGME49_272540	3.1802027	1.6691188	8.020062208500526e-07	2.2861102063110174e-06	P1	1.6691188	protein kinase (incomplete catalytic triad)
TGME49_241130	3.1615992	1.6606545	1.3278523323542125e-14	6.456557742696419e-14	P1	1.6606545	hypothetical protein
TGME49_206910	3.1593022	1.659606	0.011807108169821627	0.01923294804287627	P1	1.659606	hypothetical protein
TGME49_320180	3.1576047	1.6588306	8.375193848301198e-13	3.705441971857094e-12	P1	1.6588306	SAG-related sequence SRS16C
TGME49_283882	3.1476893	1.6542932	0.00415569216308595	0.007347493407876059	P1	1.6542932	hypothetical protein
TGME49_319992	3.127824	1.6451594	0.014209370136906785	0.022824712852094847	P1	1.6451594	hypothetical protein
TGME49_295720	3.0984359	1.6315401	5.094648813944287e-10	1.8708436470684103e-09	P1	1.6315401	sulfite oxidase putative
TGME49_216140	3.0886977	1.6269987	1.3535918959220033e-159	1.429054644119655e-157	P1	1.6269987	tetratricopeptide repeat-containing protein
TGME49_312440	3.0847192	1.6251392	0.016321253464627407	0.025940780346677284	P1	1.6251392	hypothetical protein
TGME49_240950	3.0776935	1.6218495	1.4931621337387173e-21	9.891174416907613e-21	P1	1.6218495	hypothetical protein
TGME49_297390	3.0736482	1.6199521	0.00992635924625804	0.016368221435746854	P1	1.6199521	hypothetical protein
TGME49_252070	3.0726676	1.6194917	1.3701024954298665e-24	1.007126690722424e-23	P1	1.6194917	KRUF family protein
TGME49_253050	3.0635037	1.6151826	0.0029084520040409986	0.005305569249704163	P1	1.6151826	hypothetical protein
TGME49_266680	3.051521	1.6095285	3.840877059827076e-06	1.019806590609855e-05	P1	1.6095285	hypothetical protein
TGME49_289360	3.0503533	1.6089764	4.726845792852103e-12	2.010218507876579e-11	P1	1.6089764	hypothetical protein
TGME49_216610	3.0386338	1.6034229	7.928481591072245e-06	2.0353785871792154e-05	P1	1.6034229	ribosomal RNA large subunit methyltransferase J protein
TGME49_319090	3.0304394	1.599527	1.157415489367598e-07	3.5547386266177215e-07	P1	1.599527	IgA-specific serine endopeptidase
TGME49_224170	3.0282052	1.5984629	1.7889017509121647e-72	4.304576691796052e-71	P1	1.5984629	SAG-related sequence SRS60A
TGME49_213067	3.0175488	1.5933771	4.5521441956468244e-55	7.628454340562119e-54	P1	1.5933771	hypothetical protein
TGME49_246760	3.0110667	1.5902746	1.2455934517023978e-11	5.151950192496793e-11	P1	1.5902746	hypothetical protein
TGME49_203830	2.9845319	1.5775046	1.5677469076639607e-10	5.999633159098238e-10	P1	1.5775046	FHA domain-containing protein
TGME49_262940	2.9819894	1.5762751	3.570535386290745e-15	1.7802090833891165e-14	P1	1.5762751	aspartyl proteinase (eimepsin) putative
TGME49_250760	2.974992	1.5728858	1.4000121516454608e-49	2.0351983877448472e-48	P1	1.5728858	pentatricopeptide repeat domain-containing protein
TGME49_240940	2.9747741	1.5727801	7.156447316472891e-12	3.007132041538808e-11	P1	1.5727801	hypothetical protein
TGME49_235440	2.9715014	1.571192	8.135293065704783e-21	5.245090475797144e-20	P1	1.571192	hypothetical protein
TGME49_221830	2.9666321	1.5688261	0.006063582904089497	0.01043247529190057	P1	1.5688261	subtilisin SUB12
TGME49_295950	2.964315	1.5676987	2.2333913601245993e-15	1.1302111101025983e-14	P1	1.5676987	KRUF family protein
TGME49_203230	2.9636602	1.5673801	0.008147437149164563	0.0136832877633414	P1	1.5673801	hypothetical protein
TGME49_260430	2.9603424	1.5657641	9.78262052735511e-06	2.4924287473315613e-05	P1	1.5657641	hypothetical protein
TGME49_253780	2.9598708	1.5655342	1.7502002954773308e-22	1.1998532220455791e-21	P1	1.5655342	GTP cyclohydrolase I putative
TGME49_216150	2.956262	1.5637741	0.00010618871288784429	0.0002378965169895843	P1	1.5637741	peptidase family M3 protein
TGME49_231890	2.9365666	1.5541303	2.3539619693764346e-08	7.685180824643744e-08	P1	1.5541303	beta-ketoacyl-acyl carrier protein synthase III putative
TGME49_260400	2.932149	1.5519583	1.2284717209206543e-08	4.0768849331614326e-08	P1	1.5519583	hypothetical protein
TGME49_212830	2.9312923	1.5515368	8.229828035595154e-11	3.228477825761108e-10	P1	1.5515368	expressed protein JLP1
TGME49_231060	2.9299502	1.5508761	0.019377827274993067	0.030319586729268513	P1	1.5508761	subtilisin SUB9
TGME49_290970	2.9253347	1.5486016	1.8744994227367698e-82	5.516384015482494e-81	P1	1.5486016	8-amino-7-oxononanoate synthase
TGME49_235515	2.9102554	1.5411458	1.1178822995418611e-06	3.135713683802909e-06	P1	1.5411458	MORN repeat-containing protein
TGME49_203875	2.8910372	1.5315871	1.8046773016582587e-19	1.1021189074335251e-18	P1	1.5315871	hypothetical protein
TGME49_247540	2.8667738	1.5194281	0.013083062492824052	0.02115228671791576	P1	1.5194281	ATP-binding cassette G family transporter ABCG107
TGME49_237890	2.8429234	1.5073752	4.851180246593883e-21	3.156630844586436e-20	P1	1.5073752	calcium-dependent protein kinase CDPK4
TGME49_207920	2.830618	1.501117	9.502106213950943e-12	3.955386352046805e-11	P1	1.501117	hypothetical protein
TGME49_214580	2.813421	1.4923254	0.0003166859869444245	0.0006688496738516152	P1	1.4923254	tetratricopeptide repeat-containing protein
TGME49_230890	2.8124132	1.4918085	3.6396399049374716e-05	8.64708822421994e-05	P1	1.4918085	PHD-finger domain-containing protein
TGME49_258508	2.810909	1.4910368	3.882315803055366e-06	1.0304852065558021e-05	P1	1.4910368	3'5'-cyclic nucleotide phosphodiesterase domain-containing protein
TGME49_207700	2.8044019	1.4876931	0.0017579824492578602	0.0033254019633666043	P1	1.4876931	rhoptry kinase family protein ROP22 (incomplete catalytic triad)
TGME49_307460	2.8043532	1.487668	6.539141634256581e-05	0.000150776932140134	P1	1.487668	Toxoplasma gondii family B protein
TGME49_211000	2.7951193	1.4829098	0.00279073883756699	0.005112924126266984	P1	1.4829098	hypothetical protein
TGME49_355170	2.7878318	1.4791435	7.825807641697407e-06	2.010854011006276e-05	P1	1.4791435	tRNA-Arg
TGME49_289240	2.7813342	1.4757771	0.0033293665497689216	0.0059944212064268415	P1	1.4757771	DnaJ domain-containing protein
TGME49_273950	2.7745974	1.4722785	0.010723890448010653	0.01758376601124014	P1	1.4722785	replication factor C subunit 5 putative
TGME49_226720	2.7532318	1.4611261	9.151488271161094e-31	8.196550364605152e-30	P1	1.4611261	translin family protein
TGME49_208020	2.7501879	1.4595301	2.6430286237361736e-14	1.2705190527077816e-13	P1	1.4595301	AP2 domain transcription factor AP2Ib-1
TGME49_213445	2.740036	1.4541949	4.666394251561187e-07	1.356707946598478e-06	P1	1.4541949	hypothetical protein
TGME49_233130	2.7391016	1.4537028	0.0059197150277866106	0.010218253244366586	P1	1.4537028	nucleoside transporter protein
TGME49_264150	2.7257788	1.4466685	0.00021660682190092592	0.0004680125908864723	P1	1.4466685	hypothetical protein
TGME49_222300	2.7213447	1.4443197	5.369774266127618e-14	2.537947031433344e-13	P1	1.4443197	hypothetical protein
TGME49_281560	2.718759	1.4429483	0.0005638734288767495	0.0011517472745569593	P1	1.4429483	hypothetical protein
TGME49_213700	2.7059119	1.4361148	9.269666241003501e-08	2.8699267254954387e-07	P1	1.4361148	hypothetical protein
TGME49_233925	2.7049265	1.4355894	0.00804170614615677	0.013524542037124667	P1	1.4355894	hypothetical protein
TGME49_242760	2.7004528	1.4332013	2.108300367724584e-06	5.755237526115655e-06	P1	1.4332013	hypothetical protein
TGME49_255330	2.6923707	1.4288771	1.1569960192058129e-06	3.2421991964871584e-06	P1	1.4288771	hypothetical protein
TGME49_209040	2.6897938	1.4274956	9.815817372186131e-06	2.4993787616968366e-05	P1	1.4274956	hypothetical protein
TGME49_262935	2.6749833	1.4195299	1.2731912264142939e-05	3.189965321357201e-05	P1	1.4195299	hypothetical protein
TGME49_240580	2.6681368	1.4158326	8.168314875375787e-29	6.947591886951047e-28	P1	1.4158326	hypothetical protein
TGME49_299070	2.6677957	1.4156482	1.7707514864058348e-13	8.097329211794089e-13	P1	1.4156482	pyruvate kinase PyKII
TGME49_320530	2.6573412	1.4099835	5.202089534518699e-06	1.3644983915697184e-05	P1	1.4099835	hypothetical protein
TGME49_311100	2.6524978	1.4073515	2.8932012725769467e-116	1.5272486217615558e-114	P1	1.4073515	zinc finger (CCCH type) motif-containing protein
TGME49_221350	2.6443098	1.4028912	4.15486237588221e-11	1.6647043466177013e-10	P1	1.4028912	Ctr copper transporter family protein
TGME49_280605	2.6437442	1.4025826	2.6288576809199577e-20	1.6656663145573866e-19	P1	1.4025826	hypothetical protein
TGME49_202025	2.6414714	1.4013418	7.433288485134422e-07	2.1253065181261113e-06	P1	1.4013418	hypothetical protein
TGME49_215500	2.6364117	1.3985757	0.0019398990037669387	0.00364827142859398	P1	1.3985757	TPR repeat-containing protein
TGME49_320580	2.6352391	1.397934	0.015561851122739716	0.024817861514852647	P1	1.397934	hypothetical protein
TGME49_211330	2.633224	1.3968303	0.0017176846906309968	0.003255006707890823	P1	1.3968303	methionine aminopeptidase
TGME49_278005	2.6107283	1.3844523	5.296285012584907e-06	1.387912603670249e-05	P1	1.3844523	hypothetical protein
TGME49_269015	2.6050851	1.3813305	0.0031500588856359603	0.00570441624101229	P1	1.3813305	hypothetical protein
TGME49_250220	2.6023698	1.379826	4.631693484390935e-32	4.346587018796204e-31	P1	1.379826	hypothetical protein
TGME49_268035	2.59436	1.3753787	0.0004205431481293982	0.0008731335863079885	P1	1.3753787	hypothetical protein
TGME49_233210	2.592932	1.3745843	0.004740391582791309	0.008303058338501743	P1	1.3745843	hypothetical protein
TGME49_218470	2.5875905	1.3716092	0.011923798024527454	0.019404315629125025	P1	1.3716092	protein disulfide-isomerase putative
TGME49_252090	2.5840044	1.3696085	0.014634289876929274	0.023449290893671912	P1	1.3696085	hypothetical protein
TGME49_300120	2.5801542	1.3674573	4.111967406118268e-33	3.9691059099514164e-32	P1	1.3674573	aminotransferase class V superfamily protein
TGME49_293200	2.5690382	1.3612283	0.000711231602011386	0.001430252883473373	P1	1.3612283	hypothetical protein
TGME49_314650	2.5633738	1.3580439	0.0013058985859041475	0.0025233629504796224	P1	1.3580439	hypothetical protein
TGME49_218750	2.5594246	1.3558195	4.958989740669116e-10	1.824199797460425e-09	P1	1.3558195	hypothetical protein
TGME49_231420	2.5543287	1.3529441	3.373777714230736e-15	1.6860903298457277e-14	P1	1.3529441	folate/biopterin transporter putative
TGME49_310840	2.553792	1.352641	3.955627968170119e-06	1.0492849817576892e-05	P1	1.352641	hypothetical protein
TGME49_271070	2.5488043	1.3498206	0.0016290491018219806	0.003097467067534545	P1	1.3498206	hypothetical protein
TGME49_258625	2.544064	1.347135	0.00810024677388058	0.013609445842887482	P1	1.347135	peptidyl-prolyl cis-trans isomerase FKBP-type domain-containing protein
TGME49_260830	2.5316925	1.3401022	0.0003203085911847631	0.0006761625496492149	P1	1.3401022	hypothetical protein
TGME49_294570	2.5290658	1.3386046	4.810142402560109e-07	1.3965782994851384e-06	P1	1.3386046	rhodanese family domain-containing protein
TGME49_305455	2.5226219	1.334924	4.863174322471324e-85	1.5156594216823912e-83	P1	1.334924	hypothetical protein
TGME49_273740	2.5219378	1.3345327	0.0018968741519000396	0.003569741329533809	P1	1.3345327	acetyl-CoA acyltransferase B putative
TGME49_313990	2.5212743	1.334153	5.817569763710462e-06	1.5155827953207453e-05	P1	1.334153	CBF/Mak21 family protein
TGME49_216480	2.5143228	1.3301699	0.001869327200629691	0.0035233960135055502	P1	1.3301699	NMD3 family protein
TGME49_231430	2.500973	1.3224895	1.1460074307335009e-14	5.585215672230322e-14	P1	1.3224895	oligosaccharyl transferase stt3 protein putative
TGME49_269750	2.4987607	1.3212128	7.911914349653104e-05	0.00018060548269505436	P1	1.3212128	CrcB family protein
TGME49_269130	2.4901836	1.3162521	2.952240570349025e-15	1.4815581614478826e-14	P1	1.3162521	hypothetical protein
TGME49_289280	2.4882557	1.3151348	0.018159035642423493	0.028630056941554755	P1	1.3151348	hypothetical protein
TGME49_224932	2.4880726	1.3150287	8.424805570412868e-09	2.8281362419597408e-08	P1	1.3150287	hypothetical protein
TGME49_269670	2.4842694	1.3128216	4.226071593304603e-12	1.7999697769566655e-11	P1	1.3128216	hypothetical protein
TGME49_314485	2.4691236	1.3039991	8.693262584740505e-07	2.4671806381289753e-06	P1	1.3039991	hypothetical protein
TGME49_278240	2.4680023	1.3033438	8.750269688725453e-05	0.0001981892673397028	P1	1.3033438	Zn-finger in Ran binding protein and others domain-containing protein
TGME49_221220	2.460868	1.2991672	0.0010733541078015252	0.0021033755903692997	P1	1.2991672	hypothetical protein
TGME49_301210	2.4604652	1.2989311	3.093134437893621e-33	3.0062846331932704e-32	P1	1.2989311	NAD(P) transhydrogenase subunit beta putative
TGME49_310740	2.4582076	1.2976067	2.964034573966679e-23	2.0740874906149602e-22	P1	1.2976067	hypothetical protein
TGME49_214190	2.4581108	1.29755	0.0006291607486115118	0.001277992227699093	P1	1.29755	SAG-related sequence SRS46
TGME49_224040	2.4443474	1.2894493	0.00015187308079770353	0.00033421574789406044	P1	1.2894493	flagellar associated protein
TGME49_219742	2.4386647	1.2860913	0.03155281389759846	0.04709225414015136	P1	1.2860913	hypothetical protein
TGME49_247260	2.424934	1.2779454	0.00028677291529817983	0.0006099430981134291	P1	1.2779454	hypothetical protein
TGME49_319970	2.4246671	1.2777867	0.0071305786058604576	0.012107934641153482	P1	1.2777867	subtilisin SUB10
TGME49_263220	2.422011	1.2762053	2.677855277314098e-05	6.45282900775888e-05	P1	1.2762053	rhoptry kinase family protein ROP21
TGME49_212840	2.4215019	1.2759022	6.076519383534851e-08	1.9100216863913417e-07	P1	1.2759022	HIT zinc finger protein
TGME49_223672	2.4172602	1.2733728	0.0017539598466221782	0.003319279602189316	P1	1.2733728	3'(2')%2C5'-bisphosphate nucleotidase
TGME49_207710	2.4131095	1.2708933	6.977407178735698e-15	3.4462678965848946e-14	P1	1.2708933	phosphatidylinositol synthase putative
TGME49_318742	2.4129393	1.2707916	3.112786809281279e-09	1.0819175881148017e-08	P1	1.2707916	hypothetical protein
TGME49_220560	2.4084466	1.2681029	9.068126254349841e-08	2.8106199759353673e-07	P1	1.2681029	hypothetical protein
TGME49_293810	2.4036343	1.2652174	4.13702660139239e-09	1.4250133228124031e-08	P1	1.2652174	carboxyvinyl-carboxyphosphonate phosphorylmutase
TGME49_269710	2.3940709	1.2594659	1.1771591513282726e-09	4.203926508295387e-09	P1	1.2594659	hypothetical protein
TGME49_212810	2.3916516	1.2580073	5.632233948151448e-06	1.4695658920632415e-05	P1	1.2580073	hypothetical protein
TGME49_290585	2.3899162	1.25696	0.0032374969757188654	0.005840217739624421	P1	1.25696	hypothetical protein
TGME49_219218	2.3876712	1.2556043	9.659291247069542e-16	4.977570095957862e-15	P1	1.2556043	hypothetical protein
TGME49_311335	2.3854973	1.2542901	5.84268934719389e-07	1.6853604585518986e-06	P1	1.2542901	dual specificity phosphatase catalytic domain-containing protein
TGME49_209440	2.3778949	1.2496849	3.0820155249813e-07	9.108013689290434e-07	P1	1.2496849	hypothetical protein
TGME49_217470	2.374967	1.2479075	0.02256190263684501	0.03478602221080558	P1	1.2479075	hypothetical protein
TGME49_289273	2.373795	1.2471954	1.98892405985017e-21	1.3134052079354602e-20	P1	1.2471954	hypothetical protein
TGME49_295740	2.3736897	1.2471313	0.00022859314789109005	0.0004925249303796293	P1	1.2471313	hypothetical protein
TGME49_299820	2.3726532	1.2465012	0.006739444113440221	0.011494617322721345	P1	1.2465012	hypothetical protein
TGME49_227370	2.3691633	1.2443776	2.0586502716189276e-09	7.253800665036905e-09	P1	1.2443776	hydrolase CocE/NonD family protein
TGME49_238020	2.3542957	1.2352955	2.142984733993505e-05	5.231112446043106e-05	P1	1.2352955	hypothetical protein
TGME49_320715	2.3494344	1.2323135	0.030801698953775623	0.046068912584308286	P1	1.2323135	hypothetical protein
TGME49_263230	2.345634	1.2299778	3.0366378317321185e-07	8.97705394708067e-07	P1	1.2299778	hypothetical protein
TGME49_321660	2.3426476	1.2281399	1.0163669118040868e-07	3.138659940437776e-07	P1	1.2281399	mannosyltransferase putative
TGME49_320190	2.3422341	1.2278852	7.593443352304304e-42	9.109974794540078e-41	P1	1.2278852	SAG-related sequence SRS16B
TGME49_205430	2.34029	1.2266874	0.0007063294368025512	0.0014227661395741348	P1	1.2266874	isovaleryl-CoA dehydrogenase
TGME49_236010	2.3359308	1.2239976	3.7910014614104843e-59	7.021666303305472e-58	P1	1.2239976	prenylcysteine oxidase
TGME49_213780	2.335274	1.2235918	0.000884206593677622	0.0017571785624002814	P1	1.2235918	radical SAM domain-containing protein
TGME49_260205	2.3291197	1.2197847	1.0195903173257748e-05	2.5891340409300947e-05	P1	1.2197847	hypothetical protein
TGME49_301240	2.3276448	1.2188709	2.4593917351781544e-25	1.859626015695138e-24	P1	1.2188709	hypothetical protein
TGME49_280680	2.320976	1.2147316	1.3266115968222576e-11	5.4683072458569e-11	P1	1.2147316	hypothetical protein
TGME49_207970	2.3182666	1.2130466	4.535978987782212e-05	0.00010671553908303223	P1	1.2130466	HEAT repeat-containing protein
TGME49_318640	2.3139782	1.2103753	1.17524664108012e-05	2.9577273928971078e-05	P1	1.2103753	hypothetical protein
TGME49_320588	2.3136525	1.2101722	0.0037815176779794272	0.0067409662955285445	P1	1.2101722	glycosyl hydrolases family 35 protein
TGME49_206300	2.311104	1.2085822	0.008934058407917365	0.01488011384604024	P1	1.2085822	hypothetical protein
TGME49_218230	2.3039184	1.2040896	0.0001573993144533385	0.00034601629616681334	P1	1.2040896	histone lysine methyltransferase SET putative
TGME49_260030	2.3037796	1.2040027	7.951155886637574e-05	0.000181452209182764	P1	1.2040027	atypical MEK-related kinase (incomplete catalytic triad)
TGME49_266675	2.3008692	1.202179	7.099037858663938e-06	1.8358381431192783e-05	P1	1.202179	hypothetical protein
TGME49_262660	2.2986975	1.2008166	1.9881544225486566e-07	5.982170378641238e-07	P1	1.2008166	hypothetical protein
TGME49_233470	2.297768	1.2002332	4.569869499897711e-36	4.776871014373276e-35	P1	1.2002332	hypothetical protein
TGME49_310520	2.2976375	1.2001512	2.9601937868132797e-06	7.932042107685585e-06	P1	1.2001512	3'5'-cyclic nucleotide phosphodiesterase domain-containing protein
TGME49_285220	2.290855	1.1958861	7.626512783573882e-06	1.963228496496952e-05	P1	1.1958861	CAP-Gly domain-containing protein
TGME49_266380	2.289466	1.1950111	0.0005521480050068531	0.0011299835353253893	P1	1.1950111	hypothetical protein
TGME49_248590	2.2894046	1.1949725	4.573604190545163e-08	1.4527514476624464e-07	P1	1.1949725	hypothetical protein
TGME49_276920	2.288375	1.1943234	3.2601870234540924e-17	1.816328469663144e-16	P1	1.1943234	protein phosphatase 2C domain-containing protein
TGME49_355160	2.2842927	1.1917475	0.00011149195037076747	0.00024918259138171527	P1	1.1917475	tRNA-Val
TGME49_271080	2.2786815	1.1881993	8.85949216760561e-05	0.00020055553698096216	P1	1.1881993	hypothetical protein
TGME49_220585	2.2778044	1.1876439	3.782660375388045e-08	1.2106233243852755e-07	P1	1.1876439	hypothetical protein
TGME49_224180	2.2730317	1.1846178	0.0015728983973555216	0.0029967741628839917	P1	1.1846178	hypothetical protein
TGME49_355150	2.271515	1.1836548	0.0002481590144619751	0.0005322374393463285	P1	1.1836548	tRNA-Arg
TGME49_201820	2.269518	1.1823859	2.7148990258464146e-14	1.3035836937065842e-13	P1	1.1823859	hypothetical protein
TGME49_255680	2.2658696	1.1800648	1.5295160419840638e-05	3.8028532501022676e-05	P1	1.1800648	YbaK/proline-tRNA ligase associated domain-containing protein
TGME49_273430	2.2652092	1.1796443	0.013267928567470959	0.02141837245429276	P1	1.1796443	SAM-dependent methyltransferase
TGME49_266900	2.2621932	1.1777222	9.077179194436318e-38	9.841573231862534e-37	P1	1.1777222	cyclin N-terminal domain-containing protein
TGME49_285520	2.2611785	1.1770749	0.00017091000705536966	0.00037386840704212697	P1	1.1770749	RNA cap guanine-N2 methyltransferase
TGME49_269020	2.2592502	1.1758441	3.483496733727006e-05	8.290113669500786e-05	P1	1.1758441	hypothetical protein
TGME49_239430	2.251258	1.1707313	0.03197893333171653	0.04762723874443269	P1	1.1707313	EF hand domain-containing protein
TGME49_222160	2.2473962	1.1682545	2.9005136593703387e-22	1.9772185929815883e-21	P1	1.1682545	aldehyde dehydrogenase
TGME49_293030	2.2466598	1.1677816	0.011790324454035984	0.019213019552148932	P1	1.1677816	hypothetical protein
TGME49_268290	2.2456918	1.1671599	0.003783065696128722	0.006742302778962478	P1	1.1671599	DEAD/DEAH box helicase domain-containing protein
TGME49_313220	2.2430263	1.1654465	0.006006197447526992	0.010342169957556161	P1	1.1654465	hypothetical protein
TGME49_234200	2.2381873	1.1623307	0.0015223190386731862	0.0029069650917100905	P1	1.1623307	hypothetical protein
TGME49_220070	2.236636	1.1613305	0.010577422186900259	0.01735371169202789	P1	1.1613305	hypothetical protein
TGME49_235187	2.2360506	1.1609528	0.0012887610421651854	0.002491388363956777	P1	1.1609528	hypothetical protein
TGME49_204500	2.2349792	1.1602614	0.0004156921849926203	0.0008643368277813074	P1	1.1602614	hypothetical protein
TGME49_245746	2.2341003	1.159694	0.002309690661519919	0.004285511275746317	P1	1.159694	hypothetical protein
TGME49_355140	2.2263525	1.154682	0.004679480660791871	0.00820317427585059	P1	1.154682	tRNA-Leu
TGME49_301180	2.22435	1.1533839	1.9617098791551482e-15	9.96907439190396e-15	P1	1.1533839	SAG-related sequence SRS19F
TGME49_310580	2.224309	1.1533571	1.5113836121390832e-13	6.941351815185806e-13	P1	1.1533571	1%2C3(4)-beta-glucanase
TGME49_297890	2.2231872	1.1526295	4.406826762466149e-19	2.6472303581642315e-18	P1	1.1526295	hypothetical protein
TGME49_263390	2.2210975	1.1512727	4.0884924820251847e-07	1.1961000174293284e-06	P1	1.1512727	hypothetical protein
TGME49_320280	2.217743	1.1490922	0.021010688913213473	0.032626636984923886	P1	1.1490922	hypothetical protein
TGME49_283830	2.2144663	1.1469591	0.004121024669978857	0.007292305544236629	P1	1.1469591	type I inorganic pyrophosphatase PPase
TGME49_281480	2.2109342	1.1446561	0.00038390384414555885	0.0008013969025342042	P1	1.1446561	WD domain G-beta repeat-containing protein
TGME49_265220	2.205436	1.1410639	1.5500864234369273e-15	7.924957586167245e-15	P1	1.1410639	co-chaperone GrpE protein
TGME49_316700	2.2011018	1.1382258	2.503320675925638e-06	6.791855582675213e-06	P1	1.1382258	uridine kinase
TGME49_223470	2.1993968	1.137108	8.974178629520367e-20	5.552814117577218e-19	P1	1.137108	hypothetical protein
TGME49_213710	2.1985955	1.1365823	6.233701903308609e-10	2.276257945324017e-09	P1	1.1365823	WD domain G-beta repeat-containing protein
TGME49_310090	2.197981	1.136179	6.477642995039267e-07	1.860890229119104e-06	P1	1.136179	hypothetical protein
TGME49_320525	2.196236	1.135033	4.125090974057189e-07	1.2047205521053602e-06	P1	1.135033	hypothetical protein
TGME49_223900	2.1959567	1.1348495	0.0005787062524752062	0.0011800465978767725	P1	1.1348495	hypothetical protein
TGME49_248190	2.1925597	1.1326162	1.2109138760798827e-43	1.531044700205193e-42	P1	1.1326162	hypothetical protein
TGME49_250720	2.1905587	1.1312989	0.0031183413549821393	0.00565182641291398	P1	1.1312989	hypothetical protein
TGME49_284310	2.1882877	1.1298025	1.1445118877493027e-09	4.094259806832109e-09	P1	1.1298025	hypothetical protein
TGME49_214090	2.1807344	1.124814	2.9278518437327155e-06	7.852853817772789e-06	P1	1.124814	signal peptidase
TGME49_246030	2.1784403	1.1232955	0.017693490402838182	0.027969159637351918	P1	1.1232955	mediator complex subunit MED17
TGME49_262560	2.1660285	1.1150522	6.1769680509337145e-68	1.348079383932459e-66	P1	1.1150522	hypothetical protein
TGME49_271910	2.1632755	1.1132174	0.002411956188558073	0.004465449795826718	P1	1.1132174	DnaJ domain-containing protein
TGME49_272630	2.1626647	1.11281	0.01511244112666054	0.02413760925789995	P1	1.11281	U6 snRNA-associated Sm family protein LSm8 putative
TGME49_202140	2.1615226	1.1120479	0.0006591207564068794	0.0013333973433802405	P1	1.1120479	enoyl-CoA hydratase/isomerase family protein
TGME49_254500	2.1578138	1.1095704	0.005124205019504982	0.008923512493760636	P1	1.1095704	hypothetical protein
TGME49_261610	2.1517408	1.1055043	0.0004935341353689437	0.0010161846190458552	P1	1.1055043	hypothetical protein
TGME49_294585	2.1504254	1.1046221	2.6870813505187583e-09	9.405341519470134e-09	P1	1.1046221	hypothetical protein
TGME49_227010	2.150031	1.1043575	0.00032676322110374495	0.0006887552197260369	P1	1.1043575	rhoptry kinase family protein ROP30
TGME49_320270	2.1496847	1.104125	1.874875361545179e-11	7.657252081049604e-11	P1	1.104125	hypothetical protein
TGME49_253110	2.1485045	1.1033328	0.0038745263889957172	0.006895122183198025	P1	1.1033328	kinesin motor domain-containing protein
TGME49_320620	2.1472535	1.1024926	0.0007936183697978953	0.0015876126838732885	P1	1.1024926	queuine tRNA ribosyl transferase
TGME49_261970	2.1461878	1.1017764	1.014895938242365e-26	8.011038405976649e-26	P1	1.1017764	hypothetical protein
TGME49_278060	2.1408303	1.0981704	0.0007639168058896901	0.0015310966641063888	P1	1.0981704	Mre11 DNA-binding domain-containing protein
TGME49_312960	2.1403105	1.0978202	5.847215765359318e-07	1.686090281810338e-06	P1	1.0978202	hypothetical protein
TGME49_316450	2.136874	1.0955018	7.925914393538634e-06	2.0353381869208665e-05	P1	1.0955018	longevity-assurance protein (LAG1) domain-containing protein
TGME49_207100	2.1314752	1.0918523	0.005941574216966889	0.010247607889830986	P1	1.0918523	hypothetical protein
TGME49_310670	2.1243515	1.0870225	1.360726309650255e-32	1.2971438387478616e-31	P1	1.0870225	glycogen phosphorylase 1 putative
TGME49_269260	2.1208737	1.0846587	0.0009031141078508506	0.001792223156698375	P1	1.0846587	hypothetical protein
TGME49_223060	2.1126924	1.0790827	7.610015825221521e-06	1.960176689839005e-05	P1	1.0790827	MORN repeat-containing protein
TGME49_320710	2.1119046	1.0785447	0.020528893940079684	0.031960744371965534	P1	1.0785447	hypothetical protein
TGME49_312310	2.1105669	1.0776305	2.4126403256207117e-12	1.041777105838064e-11	P1	1.0776305	ATPase AAA family protein
TGME49_249840	2.109619	1.0769824	9.711736877642106e-08	3.003490650624871e-07	P1	1.0769824	dynein heavy chain 2 putative
TGME49_222155	2.1090682	1.0766057	1.8038342997566957e-16	9.728725731637964e-16	P1	1.0766057	hypothetical protein
TGME49_271892	2.107967	1.0758522	0.005997004905916969	0.010330553423490664	P1	1.0758522	hypothetical protein
TGME49_260200	2.1073728	1.0754455	0.0004528612844022561	0.0009363198061349951	P1	1.0754455	helicase associated domain (ha2) protein
TGME49_282230	2.1069636	1.0751654	0.002889742034949643	0.005280562792554021	P1	1.0751654	sulfate adenylyltransferase/adenylylsulfate kinase
TGME49_292270	2.1063294	1.0747311	0.005192670318131223	0.009031567855629388	P1	1.0747311	SAG-related sequence SRS36C
TGME49_252210	2.1030145	1.0724587	1.0540730210330156e-98	4.2596654237535166e-97	P1	1.0724587	pentatricopeptide repeat domain-containing protein
TGME49_227380	2.1010191	1.0710893	3.2568428570808185e-87	1.082964361059236e-85	P1	1.0710893	hypothetical protein
TGME49_262540	2.0996516	1.0701499	0.027076519181225726	0.041020319462714346	P1	1.0701499	protein kinase putative
TGME49_234510	2.0957367	1.0674576	7.710507359019839e-11	3.0303836740010035e-10	P1	1.0674576	ankyrin repeat-containing protein
TGME49_313040	2.0946348	1.0666987	8.516033673864945e-08	2.6433818599582257e-07	P1	1.0666987	hypothetical protein
TGME49_319550	2.0916274	1.0646259	2.021944179911941e-34	2.023381580987708e-33	P1	1.0646259	membrane protein C17G8.08c putative
TGME49_235650	2.090457	1.0638183	0.0006341365847648931	0.0012871707750358775	P1	1.0638183	carrier superfamily protein
TGME49_278890	2.087617	1.061857	0.0002232936588375746	0.000481721134748954	P1	1.061857	hypothetical protein
TGME49_248290	2.0874624	1.0617502	2.3055871618528193e-05	5.598904303912856e-05	P1	1.0617502	WD domain G-beta repeat-containing protein
TGME49_213420	2.0873575	1.0616777	0.000974746887279758	0.00192398041831382	P1	1.0616777	RAP domain-containing protein
TGME49_249660	2.0858495	1.0606351	7.97577709254353e-09	2.6827325099013404e-08	P1	1.0606351	hypothetical protein
TGME49_289490	2.0844867	1.0596921	5.1223085866372636e-39	5.685022118625273e-38	P1	1.0596921	serine/threonine specific protein phosphatase
TGME49_263750	2.0832615	1.058844	1.5312555582820317e-06	4.231997527895955e-06	P1	1.058844	hypothetical protein
TGME49_219600	2.0786362	1.0556372	0.001518025799668849	0.0028994224115791722	P1	1.0556372	hypothetical protein
TGME49_202180	2.0768192	1.0543756	1.4048361402444185e-09	4.9874930813385286e-09	P1	1.0543756	hypothetical protein
TGME49_203900	2.074687	1.0528936	0.012666278445198426	0.020517719169187938	P1	1.0528936	hypothetical protein
TGME49_284420	2.0738592	1.052318	1.8038604474127264e-32	1.7137688795104486e-31	P1	1.052318	hypothetical protein
TGME49_247780	2.0735838	1.0521264	2.849262178108028e-16	1.5182882243722651e-15	P1	1.0521264	hypothetical protein
TGME49_315640	2.07285	1.0516157	1.6900289353007733e-09	5.972378404832775e-09	P1	1.0516157	lipoyl(octanoyl) transferase
TGME49_213460	2.072091	1.0510874	1.3366971250666973e-16	7.297830587145007e-16	P1	1.0510874	hypothetical protein
TGME49_226420	2.068567	1.0486317	8.607981223439967e-77	2.2719690441616864e-75	P1	1.0486317	peptidase family M3 protein
TGME49_208390	2.068312	1.0484538	1.2790929763551178e-10	4.939743611474771e-10	P1	1.0484538	hypothetical protein
TGME49_208320	2.0678554	1.0481353	9.375166248886109e-10	3.3709090735671383e-09	P1	1.0481353	polynucleotide kinase 3 phosphatase
TGME49_270070	2.0677953	1.0480933	0.0007796284607935275	0.0015607352405456584	P1	1.0480933	synaptobrevin family protein
TGME49_285540	2.066484	1.0471781	0.003215623960035954	0.005806961720432684	P1	1.0471781	DNA-directed DNA polymerase
TGME49_309390	2.0657885	1.0466926	0.0006358673411312578	0.0012903737537709283	P1	1.0466926	hypothetical protein
TGME49_266270	2.063824	1.0453199	1.2203146029497296e-08	4.0514061071200535e-08	P1	1.0453199	short-chain-acyl-CoA dehydrogenase
TGME49_262550	2.0622506	1.0442196	0.0033566201545962406	0.006042202435149158	P1	1.0442196	hypothetical protein
TGME49_223450	2.0611641	1.0434594	2.5093486328361322e-20	1.5911380294995475e-19	P1	1.0434594	ubiquitin carboxyl-terminal hydrolase
TGME49_262710	2.0601478	1.0427479	1.2352671869285692e-89	4.258394555428039e-88	P1	1.0427479	Ctr copper transporter family protein
TGME49_267460	2.0593052	1.0421576	3.518622747022728e-08	1.1282569370293834e-07	P1	1.0421576	AP2 domain transcription factor AP2IX-1
TGME49_236400	2.0582476	1.0414165	0.014169153778728493	0.022768773366655413	P1	1.0414165	hypothetical protein
TGME49_270080	2.056922	1.040487	3.998511913192321e-05	9.462435309280568e-05	P1	1.040487	hypothetical protein
TGME49_246630	2.0563881	1.0401126	0.00014978931322514124	0.00033006014596909545	P1	1.0401126	DNA-directed RNA polymerase I RPA43
TGME49_315270	2.0562654	1.0400264	3.771787575780293e-39	4.2306132622895557e-38	P1	1.0400264	hypothetical protein
TGME49_355070	2.052061	1.0370737	2.8614018495727547e-05	6.879419305861511e-05	P1	1.0370737	tRNA-Cys
TGME49_283878	2.048009	1.034222	0.01827931216676828	0.02880355794039643	P1	1.034222	RNA recognition motif-containing protein
TGME49_319658	2.0458007	1.0326656	0.005070885713465677	0.008845250048725961	P1	1.0326656	CBF/Mak21 family protein
TGME49_268950	2.043375	1.030954	9.846989193314241e-25	7.282633163461653e-24	P1	1.030954	hypothetical protein
TGME49_200320	2.0427597	1.0305195	1.3081790174683295e-05	3.273742216751855e-05	P1	1.0305195	hypoxanthine-xanthine-guanine phosphoribosyl transferase HXGPRT
TGME49_207600	2.0414066	1.0295635	0.0008873344015242043	0.0017625649941847201	P1	1.0295635	tubulin/FtsZ family GTPase domain-containing protein
TGME49_227430	2.0400426	1.0285993	1.086448063849739e-10	4.2169762625344185e-10	P1	1.0285993	transmembrane amino acid transporter protein
TGME49_311780	2.0395076	1.0282209	0.0019123156778471082	0.0035979991568493375	P1	1.0282209	Zn-containing alcohol dehydrogenase
TGME49_267050	2.039037	1.027888	1.446256906463081e-20	9.225895643494849e-20	P1	1.027888	hydrolase alpha/beta fold family protein
TGME49_276190	2.0383546	1.027405	3.304214836278938e-06	8.814718416680958e-06	P1	1.027405	hypothetical protein
TGME49_298040	2.0375073	1.0268053	0.0002240332434984971	0.00048319325193776983	P1	1.0268053	hypothetical protein
TGME49_252230	2.0360408	1.0257665	2.20941619708313e-06	6.023476178361562e-06	P1	1.0257665	hypothetical protein
TGME49_253520	2.0350103	1.0250361	0.00648638021317237	0.01109885884936261	P1	1.0250361	U3 small nucleolar RNA-associated protein 6 protein
TGME49_224935	2.0324965	1.0232528	4.989831645831568e-26	3.859351472590973e-25	P1	1.0232528	hypothetical protein
TGME49_214170	2.0311456	1.0222937	1.0647305307183597e-07	3.280815053793238e-07	P1	1.0222937	hypothetical protein
TGME49_308945	2.0294802	1.0211103	0.0016885155465197468	0.003204764563124895	P1	1.0211103	hypothetical protein
TGME49_255250	2.0285504	1.0204492	0.01244292991212686	0.020183020172426246	P1	1.0204492	tRNA (cytosine(34)-C(5))-methyltransferase putative
TGME49_290640	2.0275192	1.0197155	2.8956141265643066e-24	2.1028681782426598e-23	P1	1.0197155	DNA mismatch repair protein MSH6-1 putative
TGME49_207965	2.027144	1.0194485	0.0030235508317405	0.005496536875781374	P1	1.0194485	hypothetical protein
TGME49_208300	2.025553	1.0183158	1.0887959247218729e-14	5.3155898151450506e-14	P1	1.0183158	hypothetical protein
TGME49_288400	2.0253987	1.018206	2.1800055394402824e-07	6.51994574579059e-07	P1	1.018206	LETM1 family protein
TGME49_202010	2.0248344	1.0178039	6.720954137754743e-33	6.428672553508104e-32	P1	1.0178039	hypothetical protein
TGME49_214500	2.0245	1.0175656	0.0004927624523629267	0.0010148431291532015	P1	1.0175656	ankyrin repeat-containing protein
TGME49_216280	2.024129	1.0173012	0.01241806983884314	0.020146565090063226	P1	1.0173012	adenylate and guanylate cyclase catalytic domain-containing protein
TGME49_220330	2.022153	1.015892	0.004091486590385256	0.007243071838690815	P1	1.015892	hypothetical protein
TGME49_237470	2.0220664	1.0158304	3.0504051324843537e-10	1.1435295938287993e-09	P1	1.0158304	glycine cleavage T-protein (aminomethyl transferase) domain-containing protein
TGME49_283820	2.0218346	1.0156649	0.003455000191253988	0.0062021108640448845	P1	1.0156649	glycine cleavage T-protein (aminomethyl transferase) domain-containing protein
TGME49_273350	2.0209768	1.0150528	2.9000345566791592e-06	7.790614461104384e-06	P1	1.0150528	molybdopterin converting factor subunit 2 protein
TGME49_265260	2.0199156	1.014295	6.274852105040171e-09	2.1275552340092044e-08	P1	1.014295	hypothetical protein
TGME49_313385	2.0181427	1.0130281	4.339643795573644e-06	1.1471872143165883e-05	P1	1.0130281	hypothetical protein
TGME49_306280	2.0138254	1.0099386	3.013898050426176e-20	1.8996554428283197e-19	P1	1.0099386	mediator complex subunit MED7
TGME49_309580	2.013468	1.0096825	1.0821015177971367e-11	4.4911201077713106e-11	P1	1.0096825	transporter major facilitator family protein
TGME49_263680	2.0124164	1.0089288	0.0010519167750517953	0.0020642400283660462	P1	1.0089288	hypothetical protein
TGME49_248770	2.010357	1.0074517	1.2850896024915807e-07	3.925449107646977e-07	P1	1.0074517	hypothetical protein
TGME49_269660	2.0099626	1.0071687	1.4997097404997828e-07	4.5563123986550955e-07	P1	1.0071687	TFIIH basal transcription factor complex helicase XPB subunit
TGME49_269270	2.008532	1.0061414	6.399466511050312e-08	2.0055619351514265e-07	P1	1.0061414	leucine rich repeat-containing protein
TGME49_314710	2.0055385	1.0039896	1.419907842208117e-10	5.456115393671408e-10	P1	1.0039896	carrier superfamily protein
TGME49_273060	2.0047626	1.0034314	5.3256900968646756e-14	2.5185206359529145e-13	P1	1.0034314	ribosomal protein S17 putative
TGME49_252320	2.0039062	1.002815	8.235265705665732e-05	0.00018747993032359239	P1	1.002815	Sas10/Utp3/C1D family protein
TGME49_213660	2.002614	1.0018843	1.0082600469194684e-83	3.096641584102484e-82	P1	1.0018843	zinc finger (CCCH type) motif-containing protein
TGME49_244580	1.9964066	0.9974055	3.4580934906692563e-06	9.21358284611752e-06	P1	0.9974055	L1P family of ribosomal protein
TGME49_273690	1.9961164	0.99719584	0.0034962038868500563	0.006268082790986112	P1	0.99719584	Wee kinase
TGME49_289170	1.9956925	0.9968894	0.029958802976712058	0.04494352574446005	P1	0.9968894	adenylate and guanylate cyclase catalytic domain-containing protein
TGME49_220460	1.9955981	0.99682117	7.603158576999947e-06	1.959007850559535e-05	P1	0.99682117	SNF7 family protein
TGME49_245710	1.994126	0.99575657	4.862783734467828e-12	2.066988999562923e-11	P1	0.99575657	phosphatidylinositol-4-phosphate 5-kinase putative
TGME49_284530	1.9913485	0.99374574	4.05602142269016e-33	3.919583173460079e-32	P1	0.99374574	hypothetical protein
TGME49_258920	1.9891537	0.9921548	0.005475730639818594	0.00949456394660395	P1	0.9921548	hypothetical protein
TGME49_278205	1.9869109	0.9905272	1.1724218305800543e-23	8.335248132221498e-23	P1	0.9905272	hypothetical protein
TGME49_315450	1.9867998	0.9904465	5.2606675083009674e-08	1.6609943093499052e-07	P1	0.9904465	hypothetical protein
TGME49_296231	1.9867308	0.99039644	2.8620361716984525e-11	1.163270332346734e-10	P1	0.99039644	hypothetical protein
TGME49_310650	1.9866508	0.9903383	0.0007589169197896486	0.001522159179421366	P1	0.9903383	hypothetical protein
TGME49_265830	1.9863104	0.9900911	0.00018674575315779412	0.00040713852121082323	P1	0.9900911	phosphodiesterase/alkaline phosphatase D family protein
TGME49_263360	1.9843242	0.98864776	1.442101867832848e-05	3.599288527102906e-05	P1	0.98864776	WD domain G-beta repeat-containing protein
TGME49_220600	1.9825052	0.98732466	4.5800977310489906e-10	1.6907126501940459e-09	P1	0.98732466	hypothetical protein
TGME49_248730	1.981789	0.98680335	2.911121469451505e-05	6.987022429948114e-05	P1	0.98680335	hypothetical protein
TGME49_227390	1.9762233	0.982746	2.2465757660783728e-06	6.120831909773528e-06	P1	0.982746	hypothetical protein
TGME49_310177	1.9755708	0.9822695	0.003172834243155568	0.005741966577607012	P1	0.9822695	hypothetical protein
TGME49_202350	1.9754623	0.9821903	0.0011421543833752374	0.002228375126354182	P1	0.9821903	50S ribosomal protein L21 putative
TGME49_248140	1.9747633	0.98167974	0.005852190994676828	0.010109962188799445	P1	0.98167974	hypothetical protein
TGME49_240430	1.9733266	0.98062974	0.001115437829451444	0.0021792708553196615	P1	0.98062974	glyoxalase family protein
TGME49_224940	1.9732828	0.98059773	2.461346336298397e-05	5.954892912167363e-05	P1	0.98059773	hypothetical protein
TGME49_275330	1.9729006	0.9803183	0.0014779064555558341	0.0028285515349251245	P1	0.9803183	ribosomal protein RPL29
TGME49_209570	1.9717988	0.97951233	0.0016853937791611847	0.0031995585207451934	P1	0.97951233	suppressor of mitotic defects protein
TGME49_223150	1.9678196	0.97659796	1.4802876389990555e-06	4.093814472490512e-06	P1	0.97659796	START domain-containing protein
TGME49_253900	1.9652412	0.9747064	5.223631101080602e-07	1.5129899958754034e-06	P1	0.9747064	parasite porphobilinogen synthase PBGS
TGME49_320200	1.9634427	0.97338545	8.704828691714456e-10	3.1365607137465994e-09	P1	0.97338545	SAG-related sequence SRS16A
TGME49_253150	1.9599947	0.97084975	0.024996995044888767	0.038143562809237676	P1	0.97084975	hypothetical protein
TGME49_238220	1.9595431	0.97051734	0.0002348142311958402	0.0005051556282934452	P1	0.97051734	EGF family domain-containing protein
TGME49_261018	1.9580196	0.9693952	0.005938105591311371	0.010243717284357811	P1	0.9693952	kelch repeat-containing protein
TGME49_273640	1.9574732	0.96899253	0.020750844362443902	0.032276543551602435	P1	0.96899253	hypothetical protein
TGME49_247390	1.9565699	0.9683267	1.463861999859829e-05	3.6514407710620544e-05	P1	0.9683267	ATPase AAA family protein
TGME49_223480	1.9497131	0.96326184	0.005458950483740395	0.009469356291984261	P1	0.96326184	sushi domain (scr repeat) domain-containing protein
TGME49_273140	1.9485348	0.9623897	5.225829458902856e-06	1.3698744757881291e-05	P1	0.9623897	radical SAM methylthiotransferase MiaB/RimO family protein
TGME49_304730	1.9452626	0.9599649	4.298982525122208e-07	1.2529056731256788e-06	P1	0.9599649	Mob1/phocein family protein
TGME49_203760	1.9443531	0.95929027	0.0277125889939694	0.041901275804343996	P1	0.95929027	hypothetical protein
TGME49_239475	1.9426229	0.95800585	0.002642623628604397	0.004861598598822204	P1	0.95800585	hypothetical protein
TGME49_266740	1.9425821	0.9579756	9.51942799570979e-11	3.711961627505304e-10	P1	0.9579756	RNA recognition motif-containing protein
TGME49_248900	1.9414324	0.95712143	0.002158226337644981	0.004027481141791761	P1	0.95712143	hypothetical protein
TGME49_204468	1.9390451	0.95534635	0.022017308423270175	0.034033343144754744	P1	0.95534635	hypothetical protein
TGME49_262080	1.937334	0.95407265	1.8537673601171978e-05	4.556728499286919e-05	P1	0.95407265	hypothetical protein
TGME49_229620	1.9365865	0.95351595	0.001011367493934982	0.0019888265084458344	P1	0.95351595	hypothetical protein
TGME49_208570	1.9354081	0.9526378	5.176502334053148e-20	3.224243267950803e-19	P1	0.9526378	ubiquitin conjugating enzyme E2 putative
TGME49_280810	1.934292	0.9518056	5.94053952066859e-12	2.5112010406189645e-11	P1	0.9518056	hypothetical protein
TGME49_279360	1.932555	0.9505094	8.980599556145205e-50	1.3145605520139062e-48	P1	0.9505094	hypothetical protein
TGME49_280450	1.9310571	0.9493908	0.0026046203330521676	0.004795862945925138	P1	0.9493908	hypothetical protein
TGME49_240440	1.9310275	0.9493687	0.0016393743773702853	0.0031149957235701753	P1	0.9493687	hypothetical protein
TGME49_285670	1.927748	0.94691646	0.02610645697445932	0.039714541715829145	P1	0.94691646	hypothetical protein
TGME49_310630	1.927207	0.9465115	2.4699421800013544e-07	7.355829214489224e-07	P1	0.9465115	hypothetical protein
TGME49_253650	1.9244728	0.9444633	2.6970744052830476e-28	2.25539509178422e-27	P1	0.9444633	DnaJ C terminal region domain-containing protein
TGME49_241150	1.9242308	0.9442819	3.492910641373049e-16	1.8530856329796968e-15	P1	0.9442819	hypothetical protein
TGME49_311070	1.9220037	0.94261116	1.6390182798046348e-12	7.139323564326945e-12	P1	0.94261116	hypothetical protein
TGME49_237810	1.9201287	0.941203	0.001867183524459603	0.0035201410820504034	P1	0.941203	hypothetical protein
TGME49_268310	1.9154335	0.93767095	0.004619159878640135	0.008102476497402821	P1	0.93767095	oocyst wall protein OWP3
TGME49_226390	1.9151947	0.9374911	0.01035278229911082	0.017038113659058846	P1	0.9374911	hypothetical protein
TGME49_355130	1.9121356	0.93518484	0.0067625842479040865	0.01152942804961605	P1	0.93518484	tRNA-Asn
TGME49_246995	1.9095938	0.9332658	0.004366043551016273	0.007688824818991544	P1	0.9332658	hypothetical protein
TGME49_265440	1.9083589	0.9323325	4.2666036970876916e-07	1.2438983370936364e-06	P1	0.9323325	hypothetical protein
TGME49_230700	1.9083219	0.9323045	2.1248498675454512e-06	5.796667306617855e-06	P1	0.9323045	hypothetical protein
TGME49_253080	1.9079027	0.93198764	0.004434167381342021	0.007799037422493691	P1	0.93198764	hypothetical protein
TGME49_218930	1.905014	0.92980164	2.8516793881431417e-06	7.668030599254052e-06	P1	0.92980164	BTB/POZ domain-containing protein
TGME49_205170	1.9046787	0.92954767	1.3298937889191895e-29	1.1567747622256927e-28	P1	0.92954767	hypothetical protein
TGME49_314310	1.9040799	0.929094	2.196993331583432e-26	1.7149543140992298e-25	P1	0.929094	hypothetical protein
TGME49_253680	1.9001563	0.9261181	2.769124511294218e-05	6.659460598630685e-05	P1	0.9261181	hypothetical protein
TGME49_214560	1.897821	0.9243439	2.4307088442957993e-08	7.920434760386698e-08	P1	0.9243439	hypothetical protein
TGME49_222400	1.8972372	0.92390007	1.9908844905447667e-13	9.084284390675905e-13	P1	0.92390007	hypothetical protein
TGME49_314910	1.8965949	0.92341155	0.019528323490235665	0.030538089279490914	P1	0.92341155	starch binding domain-containing protein
TGME49_234507	1.8938262	0.921304	1.3872833436175575e-09	4.931395252606857e-09	P1	0.921304	hypothetical protein
TGME49_253310	1.8925724	0.9203485	0.0002013824290456892	0.0004366818987727576	P1	0.9203485	hypothetical protein
TGME49_263760	1.8917774	0.91974235	0.0009456866683153144	0.0018696792136215228	P1	0.91974235	hypothetical protein
TGME49_306338	1.8859597	0.9152989	5.1104760171799276e-42	6.14858695742189e-41	P1	0.9152989	dynein gamma chain flagellar outer arm putative
TGME49_259960	1.8849846	0.91455275	4.099567820738725e-06	1.0861025663098892e-05	P1	0.91455275	Nucleoside-diphosphatase
TGME49_207875	1.8827363	0.91283095	0.00849581076835418	0.014209033217726614	P1	0.91283095	GCC2 and GCC3 domain-containing protein
TGME49_220125	1.882054	0.912308	0.030802439720476627	0.0460618636471575	P1	0.912308	hypothetical protein
TGME49_288990	1.8817703	0.9120905	0.002174480758170332	0.004053335794197004	P1	0.9120905	hypothetical protein
TGME49_264170	1.880368	0.91101503	3.2372551317404124e-14	1.5482365143080138e-13	P1	0.91101503	hypothetical protein
TGME49_276960	1.8794154	0.910284	0.0030299393511334155	0.0055069653022751935	P1	0.910284	tetratricopeptide repeat-containing protein
TGME49_261060	1.8770828	0.9084923	4.000496367415726e-05	9.464479641230595e-05	P1	0.9084923	diphthamide biosynthesis protein 2-related domain-containing protein
TGME49_310680	1.8761128	0.90774655	0.000754713575390308	0.0015140880897260192	P1	0.90774655	aminotransferase class I/II superfamily protein
TGME49_318675	1.8759555	0.90762556	8.012625548423307e-09	2.6940539562891422e-08	P1	0.90762556	3'5'-cyclic nucleotide phosphodiesterase domain-containing protein
TGME49_271030	1.875111	0.906976	0.006280925135748882	0.010782254816368915	P1	0.906976	AP2 domain transcription factor AP2VIII-6
TGME49_293460	1.8740368	0.90614927	5.4270186095609916e-06	1.4195292405188025e-05	P1	0.90614927	ATP-dependent DNA ligase domain-containing protein
TGME49_224675	1.8734828	0.90572274	0.004917464123902092	0.008593606867468873	P1	0.90572274	hypothetical protein
TGME49_203080	1.8700637	0.9030874	3.54612789216651e-06	9.436230679659213e-06	P1	0.9030874	RNA recognition motif-containing protein
TGME49_321170	1.8695264	0.9026728	4.2294956322982515e-06	1.1194710156813234e-05	P1	0.9026728	Toxoplasma gondii family C protein
TGME49_272695	1.869404	0.90257835	9.906612084850555e-10	3.5574509212860457e-09	P1	0.90257835	hypothetical protein
TGME49_211240	1.8676058	0.90119	9.902121262289185e-06	2.5183172592982376e-05	P1	0.90119	peptidyl-tRNA hydrolase putative
TGME49_201840	1.8673973	0.90102893	1.0342672047191584e-11	4.3010442201171894e-11	P1	0.90102893	aspartyl protease ASP1
TGME49_311180	1.8664744	0.9003157	0.005459770227490309	0.009468833540325083	P1	0.9003157	hypothetical protein
TGME49_238230	1.8660458	0.8999844	3.4178221758008895e-07	1.0075715915118434e-06	P1	0.8999844	Ser/Thr phosphatase family protein
TGME49_231100	1.8644377	0.8987406	2.8671246212525295e-09	9.994112484976833e-09	P1	0.8987406	hypothetical protein
TGME49_267670	1.8629602	0.89759684	1.3407576230730175e-10	5.170794011175665e-10	P1	0.89759684	hypothetical protein
TGME49_236930	1.8597261	0.8950901	1.000632346850265e-05	2.544052017308049e-05	P1	0.8950901	hypothetical protein
TGME49_286680	1.8595338	0.894941	5.312628356581001e-09	1.813680642671105e-08	P1	0.894941	hypothetical protein
TGME49_224810	1.8586724	0.8942725	2.823361258803922e-07	8.372931598264721e-07	P1	0.8942725	hypothetical protein
TGME49_263410	1.8567591	0.8927866	0.0034780689783172752	0.006239543456004186	P1	0.8927866	scavenger receptor cysteine-rich domain-containing protein
TGME49_238240	1.8538545	0.890528	3.87818947688362e-25	2.906405352418727e-24	P1	0.890528	bystin protein
TGME49_268910	1.8513695	0.88859284	2.8817514788662894e-06	7.746426795195634e-06	P1	0.88859284	signal peptidase I protein
TGME49_201790	1.8500127	0.88753515	1.3533155775782674e-10	5.21446321543159e-10	P1	0.88753515	FHA domain-containing protein
TGME49_260570	1.8491201	0.886839	0.0005085483013347614	0.0010453149070512036	P1	0.886839	hypothetical protein
TGME49_240530	1.847801	0.88580936	0.014170987584615696	0.0227673884610356	P1	0.88580936	hypothetical protein
TGME49_305460	1.8470296	0.88520694	7.56146455628125e-95	2.8133977816013848e-93	P1	0.88520694	methionine aminopeptidase 2 putative
TGME49_272740	1.8465366	0.8848219	0.02826445649570416	0.04264408709587662	P1	0.8848219	DNA-directed RNA polymerase III RPC2
TGME49_246530	1.8452798	0.8838396	4.1366087959969736e-10	1.5330319390517962e-09	P1	0.8838396	phospholipase D active site domain-containing protein
TGME49_251800	1.8450278	0.88364255	1.7587993985542384e-06	4.83240719589756e-06	P1	0.88364255	hypothetical protein
TGME49_239880	1.8444686	0.88320524	0.019665712243262457	0.030741552027872425	P1	0.88320524	hypothetical protein
TGME49_240520	1.8412127	0.88065636	8.329463072262289e-10	3.006437825142192e-09	P1	0.88065636	hypothetical protein
TGME49_232590	1.8410501	0.8805289	3.3280308671385826e-06	8.8754495433699e-06	P1	0.8805289	glutamate-cysteine ligase catalytic subunit domain-containing protein
TGME49_250360	1.8393471	0.8791938	2.4980108439795587e-07	7.426328612548875e-07	P1	0.8791938	alpha/beta hydrolase fold domain-containing protein
TGME49_270240	1.8388906	0.8788356	2.2226410767739246e-85	6.978597224696122e-84	P1	0.8788356	MAG1
TGME49_311250	1.8387073	0.87869185	0.0001418879985639815	0.0003133035387899053	P1	0.87869185	hypothetical protein
TGME49_248530	1.8383474	0.87840945	5.587699941162241e-06	1.4588474096771649e-05	P1	0.87840945	FATC domain-containing protein
TGME49_221310	1.836566	0.8770107	0.0011585738852920738	0.0022588446526262363	P1	0.8770107	aminopeptidase N protein
TGME49_284602	1.8363295	0.8768249	1.2772516187888493e-06	3.5591115711945305e-06	P1	0.8768249	E1-E2 ATPase subfamily protein
TGME49_355080	1.8356205	0.87626785	0.00013319732351535775	0.00029488455947856133	P1	0.87626785	tRNA-His
TGME49_315885	1.8330657	0.8742585	1.7444852755388787e-08	5.737508815109568e-08	P1	0.8742585	glycosyltransferase putative
TGME49_234460	1.8320962	0.8734953	1.4425941202706811e-05	3.599453453413936e-05	P1	0.8734953	hypothetical protein
TGME49_216055	1.8306813	0.8723807	0.007429988509159685	0.012578409089669814	P1	0.8723807	hypothetical protein
TGME49_285980	1.8299443	0.8717997	1.1608739230996501e-31	1.069219318920354e-30	P1	0.8717997	glucosephosphate-mutase GPM1
TGME49_257780	1.8296301	0.87155205	0.002415774356702504	0.004470558767903012	P1	0.87155205	hypothetical protein
TGME49_280590	1.8295836	0.8715154	1.2741924025581973e-24	9.382588519622089e-24	P1	0.8715154	hypothetical protein
TGME49_313070	1.8280514	0.8703067	6.045134344743786e-07	1.7419721827262373e-06	P1	0.8703067	hypothetical protein
TGME49_313820	1.8270794	0.8695394	6.157069875403382e-25	4.5898157253007034e-24	P1	0.8695394	dynactin p25 putative
TGME49_297925	1.8261393	0.8687968	0.02585239255694049	0.03934221757403952	P1	0.8687968	HesB-like domain-containing protein
TGME49_264130	1.8256375	0.8684003	0.020294411161940824	0.03163650732258254	P1	0.8684003	hypothetical protein
TGME49_222420	1.825347	0.86817074	0.019708663858328996	0.030797294162339815	P1	0.86817074	hypothetical protein
TGME49_301010	1.824663	0.86763006	0.0002740472918940666	0.0005842007640932072	P1	0.86763006	serine/threonine protein phosphatase putative
TGME49_287450	1.8229567	0.86628026	0.0010542521770503272	0.0020678620267921654	P1	0.86628026	hypothetical protein
TGME49_269320	1.8200072	0.8639442	0.02149074659881945	0.03328031642347434	P1	0.8639442	hypothetical protein
TGME49_308930	1.8187541	0.8629505	0.00026622030303814645	0.000568376309266983	P1	0.8629505	50S ribosomal protein L33 putative
TGME49_272270	1.8174566	0.8619209	3.283802240485981e-05	7.841389234703022e-05	P1	0.8619209	radical SAM domain-containing protein
TGME49_235610	1.8161248	0.8608633	0.00163630658603864	0.0031105661547788325	P1	0.8608633	ATPase AAA family protein
TGME49_238000	1.8141869	0.85932314	5.837930847198189e-09	1.9833935613610582e-08	P1	0.85932314	peptidyl-prolyl isomerase
TGME49_238030	1.8120674	0.85763663	2.758897955749879e-12	1.1882535509568321e-11	P1	0.85763663	hypothetical protein
TGME49_270560	1.8108804	0.8566913	0.002763196968376646	0.0050657611449770245	P1	0.8566913	peptidyl-prolyl cis-trans isomerase family 1
TGME49_206415	1.8098558	0.8558748	2.114570218666628e-06	5.770487905285408e-06	P1	0.8558748	myosin K
TGME49_240525	1.8071113	0.8536853	3.7168443891883e-08	1.1900101482594535e-07	P1	0.8536853	hypothetical protein
TGME49_212920	1.8064626	0.8531674	1.8377328098403473e-13	8.399075385233536e-13	P1	0.8531674	hypothetical protein
TGME49_209770	1.8059548	0.8527618	0.0039054287829040257	0.006939880391417505	P1	0.8527618	helicase putative
TGME49_311080	1.8050567	0.85204417	0.0009620743878229314	0.001900299410559513	P1	0.85204417	transporter cation channel family protein
TGME49_266410	1.8015097	0.84920645	0.0010015505220454073	0.0019722769198404076	P1	0.84920645	hypothetical protein
TGME49_212190	1.8011323	0.84890413	2.3698702613992796e-18	1.3832705064117702e-17	P1	0.84890413	RNA recognition motif-containing protein
TGME49_270160	1.8005514	0.8484388	7.614258912078911e-07	2.1741051646862235e-06	P1	0.8484388	hypothetical protein
TGME49_320440	1.7973613	0.8458804	0.0007205140492194306	0.00144788523904528	P1	0.8458804	hypothetical protein
TGME49_224140	1.7972841	0.8458185	5.361716046643636e-06	1.4041877125566557e-05	P1	0.8458185	hypothetical protein
TGME49_214780	1.7964845	0.84517646	2.355421842898929e-05	5.714993646976258e-05	P1	0.84517646	hydrolase NUDIX family protein
TGME49_305800	1.7963105	0.8450368	5.284788550049271e-05	0.00012303011051189677	P1	0.8450368	6-pyruvoyl tetrahydrobiopterin synthase
TGME49_315560	1.7953616	0.84427446	0.00013666411352369404	0.00030232192321139864	P1	0.84427446	ATP-binding cassette G family transporter ABCG77
TGME49_273960	1.7950753	0.8440443	0.0009040049615884261	0.00179356962780734	P1	0.8440443	chaperonin GroS protein
TGME49_207410	1.7949963	0.84398085	0.00041320744492860277	0.0008595936157307831	P1	0.84398085	tetratricopeptide repeat-containing protein
TGME49_263215	1.7915729	0.84122676	0.0023853596646238526	0.00442008506525078	P1	0.84122676	hypothetical protein
TGME49_292920	1.7910388	0.8407966	3.2047472443919137e-27	2.5656204005814318e-26	P1	0.8407966	heat shock protein 75 putative
TGME49_247250	1.7908838	0.8406717	1.3585503159371197e-13	6.259855956576603e-13	P1	0.8406717	RbAp46
TGME49_252190	1.7897927	0.8397925	0.00048173209756558844	0.00099285243924816	P1	0.8397925	KRUF family protein
TGME49_312105	1.7892992	0.8393947	9.233595883490707e-11	3.6038332177431844e-10	P1	0.8393947	hypothetical protein
TGME49_287470	1.7890978	0.8392322	0.001699776849258161	0.0032232409674078197	P1	0.8392322	hypothetical protein
TGME49_311750	1.7884213	0.8386866	0.00028881100403355993	0.0006138142274955831	P1	0.8386866	mago binding protein
TGME49_293840	1.7846782	0.835664	2.926593748130244e-07	8.666904206419368e-07	P1	0.835664	hypothetical protein
TGME49_318275	1.7837731	0.8349321	0.001233688321918423	0.002394790063645829	P1	0.8349321	peptidyl-prolyl cis-trans isomerase FKBP-type domain-containing protein
TGME49_295730	1.783299	0.8345486	7.122818490203171e-19	4.248539898888135e-18	P1	0.8345486	tetratricopeptide repeat-containing protein
TGME49_239440	1.78288	0.83420956	7.024146563137298e-06	1.8175840034392654e-05	P1	0.83420956	protein kinase (incomplete catalytic triad)
TGME49_248380	1.7815032	0.8330951	2.5015231895658774e-16	1.3380535059577833e-15	P1	0.8330951	hypothetical protein
TGME49_276200	1.779692	0.8316276	2.4827749807016025e-12	1.0709661637898741e-11	P1	0.8316276	hypothetical protein
TGME49_293660	1.7778773	0.8301558	2.8403909969397215e-09	9.90501336092192e-09	P1	0.8301558	hypothetical protein
TGME49_283760	1.7778482	0.8301322	0.029948537681174028	0.044936107524461866	P1	0.8301322	hypothetical protein
TGME49_267480	1.7777191	0.8300274	6.939564248994579e-05	0.0001594438510527971	P1	0.8300274	tRNA (guanine(26)-N(2))-dimethyltransferase putative
TGME49_312370	1.7742318	0.8271945	0.03261756734262595	0.04848433188592376	P1	0.8271945	RNA pseudouridine synthase superfamily protein
TGME49_294250	1.7726874	0.82593817	1.9963373405487742e-10	7.591654740330908e-10	P1	0.82593817	WD domain G-beta repeat-containing protein
TGME49_282000	1.771226	0.82474834	8.642949495388484e-16	4.467463368301783e-15	P1	0.82474834	hypothetical protein
TGME49_212930	1.7710394	0.8245963	7.372833299063145e-14	3.4537409896776106e-13	P1	0.8245963	NifU family domain-containing protein
TGME49_216640	1.7706869	0.8243091	0.017067980846238853	0.02703604017766942	P1	0.8243091	GHMP kinase putative
TGME49_275320	1.7705772	0.82421976	4.0629832825119e-09	1.4012232259736834e-08	P1	0.82421976	penicillin amidase
TGME49_295020	1.7704948	0.8241526	7.190974936232158e-05	0.0001649510437572428	P1	0.8241526	Sterol-sensing domain of SREBP cleavage-activation domain-containing protein
TGME49_206680	1.7700927	0.82382494	0.0006893469420842665	0.0013902159199722338	P1	0.82382494	hypothetical protein
TGME49_208050	1.7664739	0.8208724	0.00026739719683952314	0.0005707446865065991	P1	0.8208724	ABC transporter putative
TGME49_299030	1.7659366	0.82043356	8.682397080691148e-17	4.780412369199311e-16	P1	0.82043356	RNA recognition motif 2 protein
TGME49_231996	1.7650034	0.81967103	0.004229210569633918	0.007466536887777606	P1	0.81967103	hypothetical protein
TGME49_320592	1.7638361	0.8187165	1.4230762682217924e-05	3.552853136683789e-05	P1	0.8187165	hypothetical protein
TGME49_268790	1.7627414	0.8178209	7.377949767823957e-47	1.0115935671922264e-45	P1	0.8178209	hypothetical protein
TGME49_259920	1.7618374	0.81708074	0.012544891479126337	0.020328885923388534	P1	0.81708074	Nitric-oxide synthase
TGME49_230910	1.7615671	0.8168594	0.02205098527120087	0.03406669500650494	P1	0.8168594	hypothetical protein
TGME49_203970	1.7611073	0.81648284	1.3844501374233392e-05	3.459486941028853e-05	P1	0.81648284	dolichyl-diphosphooligosaccharide--protein glycosyltransferase
TGME49_269075	1.7603924	0.81589705	0.0009150300969764622	0.001814165304944413	P1	0.81589705	hypothetical protein
TGME49_286620	1.7594283	0.8151067	0.00526412220333842	0.00913890567921815	P1	0.8151067	S1 RNA binding domain-containing protein
TGME49_270230	1.7593657	0.8150554	0.0011367825679008262	0.0022189197061452228	P1	0.8150554	hypothetical protein
TGME49_257720	1.7591194	0.8148534	2.9508847283260185e-20	1.8627184166996674e-19	P1	0.8148534	proton ATPase putative
TGME49_221665	1.7580547	0.81398	0.025251147392199563	0.03851746268277362	P1	0.81398	hypothetical protein
TGME49_320015	1.7566533	0.8128295	0.0003519767550119608	0.0007383993226107852	P1	0.8128295	hypothetical protein
TGME49_251540	1.7564294	0.8126456	2.0902255716244341e-81	6.066682191731949e-80	P1	0.8126456	dense granule protein GRA9
TGME49_222250	1.7550958	0.8115498	0.00962404328453448	0.015928800623393732	P1	0.8115498	hypothetical protein
TGME49_281675	1.7550046	0.81147486	0.0007009995773336763	0.0014123669919275357	P1	0.81147486	protein kinase putative
TGME49_278180	1.7545758	0.8111223	0.000884999841281861	0.0017583412513447656	P1	0.8111223	hypothetical protein
TGME49_310500	1.7534895	0.8102288	0.01909219300129059	0.029933666621292057	P1	0.8102288	hypothetical protein
TGME49_251670	1.7531799	0.8099741	1.5076082853072193e-05	3.74948750815806e-05	P1	0.8099741	werner helicase interacting protein 1 putative
TGME49_272500	1.7523817	0.80931705	0.0007740876962055844	0.0015503781555969566	P1	0.80931705	sugar transporter ST2
TGME49_293680	1.7523636	0.80930215	7.2647650206467665e-06	1.8758240710603053e-05	P1	0.80930215	hypothetical protein
TGME49_252220	1.7505531	0.80781084	7.864240443628561e-11	3.087930022635371e-10	P1	0.80781084	tetratricopeptide repeat domain containing protein
TGME49_245752	1.7503194	0.8076182	0.01149261027190941	0.01876770811224804	P1	0.8076182	WD domain G-beta repeat-containing protein
TGME49_220610	1.7501749	0.8074991	1.23567382535466e-07	3.784083077935264e-07	P1	0.8074991	protein phosphatase 2C domain-containing protein
TGME49_291070	1.7479335	0.8056503	3.3258829574799366e-36	3.4851622157413826e-35	P1	0.8056503	hypothetical protein
TGME49_258970	1.7449329	0.8031716	0.011479665092834294	0.018750193651920027	P1	0.8031716	hypothetical protein
TGME49_267360	1.7439413	0.8023515	2.423384309949297e-05	5.866409825689814e-05	P1	0.8023515	histone deacetylase SIR2-like
TGME49_219130	1.7433372	0.80185163	0.03070958718995533	0.045947417786778154	P1	0.80185163	NADPH-glutathione reductase
TGME49_291040	1.7423407	0.8010267	2.9046298306153623e-163	3.36061692457224e-161	P1	0.8010267	lactate dehydrogenase LDH2
TGME49_209460	1.7418997	0.80066156	0.012189163476454256	0.019790402676303852	P1	0.80066156	hypothetical protein
TGME49_293620	1.7418563	0.8006256	0.03245400334412206	0.0482581887754322	P1	0.8006256	hypothetical protein
TGME49_290910	1.7412484	0.800122	1.2576795586260984e-15	6.4456077379587544e-15	P1	0.800122	hypothetical protein
TGME49_222390	1.740598	0.799583	2.048743022562191e-05	5.0155604546551495e-05	P1	0.799583	hypothetical protein
TGME49_230460	1.7392603	0.79847383	0.00884006547212476	0.01474100552370498	P1	0.79847383	Dpy-30 motif protein
TGME49_224250	1.7391645	0.7983944	0.0009883081151300691	0.0019489260659324222	P1	0.7983944	hypothetical protein
TGME49_284660	1.7387589	0.7980579	0.0005914502859287703	0.0012051602207368863	P1	0.7980579	mitochondrial ribosomal protein s6-2 putative
TGME49_241880	1.7373929	0.79692405	7.112817915665683e-18	4.0701124739642524e-17	P1	0.79692405	3'5'-cyclic nucleotide phosphodiesterase domain-containing protein
TGME49_293630	1.734839	0.7948018	0.0015595939138216231	0.002972096163388409	P1	0.7948018	hypothetical protein
TGME49_207940	1.7334031	0.7936072	0.004564646235260068	0.008010181197383448	P1	0.7936072	ribosomal protein S9 putative
TGME49_316520	1.7327108	0.7930309	6.687087078454217e-06	1.7340846627149006e-05	P1	0.7930309	1%2C4-alpha-glucan-branching enzyme
TGME49_265150	1.7326595	0.7929881	0.008178114628547044	0.013732078757993706	P1	0.7929881	hypothetical protein
TGME49_306530	1.7323622	0.7927406	5.983124739447291e-05	0.00013852377069454994	P1	0.7927406	hypothetical protein
TGME49_243635	1.7319301	0.79238075	0.0012755497807646686	0.0024669781196103484	P1	0.79238075	hypothetical protein
TGME49_315540	1.7313845	0.79192615	2.989147160252085e-08	9.658124298197823e-08	P1	0.79192615	calcium binding egf domain-containing protein
TGME49_290925	1.7292068	0.7901104	0.01586717178086003	0.025271380890277917	P1	0.7901104	hypothetical protein
TGME49_202430	1.7288498	0.7898125	9.130694917506662e-08	2.828974661528293e-07	P1	0.7898125	hypothetical protein
TGME49_286735	1.7276684	0.78882635	1.8092441565504508e-12	7.860532997029376e-12	P1	0.78882635	hypothetical protein
TGME49_248240	1.727266	0.78849024	0.00020761438568340409	0.0004491575567320776	P1	0.78849024	leucine rich repeat-containing protein
TGME49_246770	1.7270701	0.7883266	1.1379242036337996e-08	3.78680371311705e-08	P1	0.7883266	hypothetical protein
TGME49_289730	1.7267543	0.7880628	5.078894296551215e-10	1.8658695619256872e-09	P1	0.7880628	Pep3/Vps18/deep orange family protein
TGME49_212140	1.7265654	0.787905	0.01688374487502607	0.026769309032188885	P1	0.787905	hypothetical protein
TGME49_290310	1.7237401	0.78554225	1.891558985481013e-16	1.0182350026368793e-15	P1	0.78554225	hypothetical protein
TGME49_305330	1.7235665	0.785397	2.010583747081724e-51	3.0707758278213818e-50	P1	0.785397	cyclin N-terminal domain-containing protein
TGME49_216470	1.7220333	0.78411305	0.0016386866948045233	0.00311438969944172	P1	0.78411305	hypothetical protein
TGME49_260440	1.7219461	0.78404	6.798182235120381e-69	1.5352258598349395e-67	P1	0.78404	nuclear factor NF3
TGME49_298060	1.7186625	0.78128624	0.0028129200449633495	0.005151327558490991	P1	0.78128624	Toxoplasma gondii family C protein
TGME49_249190	1.713783	0.7771845	0.02643747325314556	0.04010973578158207	P1	0.7771845	AP2 domain transcription factor AP2XII-6
TGME49_293480	1.7131449	0.7766472	8.884271564724753e-24	6.342904280276016e-23	P1	0.7766472	MoeA N-terminal region (domain I and II) domain-containing protein
TGME49_207750	1.7075331	0.7719135	2.1021851062813895e-08	6.895167148602958e-08	P1	0.7719135	hypothetical protein
TGME49_313690	1.7053672	0.7700824	1.4676528744723015e-08	4.8515836312301593e-08	P1	0.7700824	Sel1 repeat-containing protein
TGME49_230500	1.7040284	0.76894933	0.008484449303496662	0.014195653489962915	P1	0.76894933	hypothetical protein
TGME49_306910	1.7025619	0.7677072	6.108660969686596e-08	1.9186965619179246e-07	P1	0.7677072	hypothetical protein
TGME49_260860	1.702469	0.76762855	0.002741930294772428	0.005028956193191732	P1	0.76762855	hypothetical protein
TGME49_208360	1.7012767	0.7666178	0.030061714798370665	0.04508189687269862	P1	0.7666178	hypothetical protein
TGME49_253750	1.6997952	0.76536095	4.2385610151269705e-10	1.5680633523330001e-09	P1	0.76536095	PLU-1 family protein
TGME49_260520	1.6986672	0.7644032	3.0690707984164586e-16	1.6313009416881944e-15	P1	0.7644032	hypothetical protein
TGME49_248960	1.6977183	0.7635971	0.0029566792389989047	0.00538656446345659	P1	0.7635971	methyltransferase domain-containing protein
TGME49_230830	1.696999	0.7629857	4.7793069845652e-05	0.00011215900747884879	P1	0.7629857	ATPase family associated with various cellular activities (AAA) domain-containing protein
TGME49_263470	1.6961347	0.7622507	0.0028753910386072053	0.00525661314114209	P1	0.7622507	ubiquitin carboxyl-terminal hydrolase UCHL3
TGME49_290590	1.696005	0.7621404	0.002185719337106946	0.004071589219498294	P1	0.7621404	hypothetical protein
TGME49_287460	1.6933496	0.7598798	0.0008088890479160381	0.0016147191913729278	P1	0.7598798	hypothetical protein
TGME49_237570	1.6931472	0.7597074	1.911701085729926e-07	5.756230791470572e-07	P1	0.7597074	leucine carboxyl methyltransferase
TGME49_288845	1.692775	0.75939023	0.0005582060263958494	0.0011412752599707925	P1	0.75939023	hypothetical protein
TGME49_268610	1.6924295	0.7590958	8.730643578665928e-08	2.708006451171958e-07	P1	0.7590958	hypothetical protein
TGME49_262000	1.6907806	0.7576895	0.00633955030370093	0.010874053993716095	P1	0.7576895	AP2 domain transcription factor AP2VIIb-2
TGME49_255380	1.6906439	0.7575728	0.0002726464547121458	0.000581508069822925	P1	0.7575728	hypothetical protein
TGME49_273290	1.6896559	0.7567295	0.01795375091848849	0.028348734391017722	P1	0.7567295	Mpv17 / PMP22 family protein
TGME49_263570	1.686598	0.7541161	1.5979633269242344e-35	1.6479118753604496e-34	P1	0.7541161	hypothetical protein
TGME49_307030	1.6856945	0.75334305	0.01328730246445564	0.02144554875115466	P1	0.75334305	Purine nucleoside phosphorylase
TGME49_236670	1.6854552	0.7531383	3.9571296790167315e-13	1.78250225434535e-12	P1	0.7531383	hypothetical protein
TGME49_273815	1.6835402	0.75149816	0.01972647967895235	0.030819431625681015	P1	0.75149816	hypothetical protein
TGME49_225380	1.6803235	0.748739	0.008883049664226365	0.01480683589186025	P1	0.748739	hypothetical protein
TGME49_288510	1.6802653	0.74868906	1.0512388601542433e-05	2.660702251382301e-05	P1	0.74868906	ubiquitin carboxyl-terminal hydrolase
TGME49_321340	1.6792747	0.74783826	0.01788848860587417	0.02825625112496975	P1	0.74783826	membrane protein putative
TGME49_266670	1.6792089	0.7477817	1.0993723257017673e-06	3.0848168315206405e-06	P1	0.7477817	hypothetical protein
TGME49_235640	1.6790974	0.7476859	0.0201067103298771	0.03138445304863094	P1	0.7476859	formyl transferase domain-containing protein
TGME49_299080	1.6778072	0.74657696	4.023592693219446e-05	9.516455863044369e-05	P1	0.74657696	VTC domain-containing protein
TGME49_239610	1.6773258	0.746163	0.0002720285122548459	0.0005803366543330206	P1	0.746163	hypothetical protein
TGME49_318730	1.6750225	0.74418044	3.1744492923208997e-15	1.5902371721792597e-14	P1	0.74418044	glycosyl transferase
TGME49_288890	1.6745602	0.7437822	0.007819778502738345	0.01319070286281767	P1	0.7437822	hypothetical protein
TGME49_244620	1.6744326	0.7436724	0.00090984652414439	0.0018043117499233429	P1	0.7436724	NEK kinase
TGME49_310610	1.6739362	0.7432446	0.0012687188611897144	0.0024554535979854097	P1	0.7432446	hypothetical protein
TGME49_216960	1.6730838	0.7425097	0.003234135784666026	0.005836647614805397	P1	0.7425097	elongation factor Tu GTP binding domain-containing protein
TGME49_318580	1.6722677	0.7418058	1.0466969507215845e-05	2.6500007331518294e-05	P1	0.7418058	glucosephosphate-mutase GPM2
TGME49_254540	1.6722037	0.7417506	8.308292907511816e-05	0.000188989609202383	P1	0.7417506	CDP-alcohol phosphatidyltransferase superfamily protein
TGME49_219832	1.6709088	0.740633	0.00222318805807544	0.0041340921044705345	P1	0.740633	cyclin-dependent kinase regulatory subunit protein
TGME49_314295	1.6708283	0.7405635	1.1498342724125352e-12	5.052809711132296e-12	P1	0.7405635	ribosomal l25 family protein
TGME49_266840	1.6707119	0.74046296	0.0033056212603298257	0.005956747848249564	P1	0.74046296	hypothetical protein
TGME49_224030	1.6703352	0.74013764	9.492804562606723e-06	2.4215109433940314e-05	P1	0.74013764	hypothetical protein
TGME49_315820	1.6697842	0.7396617	5.431570356188362e-05	0.00012634272439649382	P1	0.7396617	hypothetical protein
TGME49_319690	1.6689852	0.73897123	0.0036319520381756397	0.006490788598059977	P1	0.73897123	hypothetical protein
TGME49_285470	1.6681871	0.73828113	0.01039610471114022	0.017102746472592578	P1	0.73828113	patched family protein
TGME49_270450	1.6658585	0.7362659	0.022018606536780696	0.0340291218315919	P1	0.7362659	MCM2/3/5 family protein
TGME49_254300	1.665247	0.73573613	7.353151006593786e-08	2.2933793722928774e-07	P1	0.73573613	hypothetical protein
TGME49_322100	1.6640841	0.73472834	8.574858782559945e-10	3.0936889054891622e-09	P1	0.73472834	myosin-light-chain kinase
TGME49_234990	1.6639149	0.7345817	2.4459587782546237e-06	6.644762895187698e-06	P1	0.7345817	hypothetical protein
TGME49_284598	1.663355	0.7340961	2.483372433632978e-07	7.388011121685147e-07	P1	0.7340961	haloacid dehalogenase family hydrolase domain-containing protein
TGME49_289300	1.6597544	0.7309698	2.5530539367764107e-06	6.917899759388375e-06	P1	0.7309698	methionyl-tRNA synthetase
TGME49_288940	1.6590801	0.7303836	1.8476175162996508e-05	4.544256710153422e-05	P1	0.7303836	hypothetical protein
TGME49_320700	1.6575885	0.7290859	0.01455418423299699	0.02332978554410563	P1	0.7290859	AP2 domain transcription factor AP2IV-1
TGME49_254930	1.6574203	0.7289395	1.7313414973459164e-10	6.604747193578866e-10	P1	0.7289395	hypothetical protein
TGME49_306650	1.6566612	0.7282785	3.974381947399809e-18	2.3007285762672232e-17	P1	0.7282785	hypothetical protein
TGME49_236780	1.6507254	0.72310007	0.028931557705282822	0.04355720791066287	P1	0.72310007	zinc finger C3HC4 type (RING finger) domain-containing protein
TGME49_225360	1.6496278	0.72214055	0.00045433427811626106	0.0009391354167816792	P1	0.72214055	hypothetical protein
TGME49_225890	1.6463563	0.71927667	2.5283512248311587e-05	6.113499697945596e-05	P1	0.71927667	hypothetical protein
TGME49_240390	1.6459333	0.7189058	0.01204511547395047	0.01958287686101745	P1	0.7189058	calcium-dependent protein kinase
TGME49_239480	1.6458967	0.71887374	8.981566181609482e-06	2.2959536310494456e-05	P1	0.71887374	RNB family domain-containing protein
TGME49_265110	1.6458501	0.7188329	0.0004559497411958995	0.0009422440700123727	P1	0.7188329	ribosome biogenesis protein putative
TGME49_262630	1.6456809	0.7186846	5.62772227577525e-11	2.2346846422753999e-10	P1	0.7186846	hypothetical protein
TGME49_240900	1.6445322	0.71767724	4.940923517268888e-05	0.00011566252779061261	P1	0.71767724	AP2 domain transcription factor AP2VI-2
TGME49_290260	1.6444521	0.717607	0.003060068622493	0.0055569425038864495	P1	0.717607	thioredoxin family Trp26 protein
TGME49_235920	1.6443624	0.71752834	7.389693894873064e-15	3.6456398736038497e-14	P1	0.71752834	dynein axonemal heavy chain 2 family protein
TGME49_318190	1.6435955	0.7168553	0.004226318556075714	0.007462991119509823	P1	0.7168553	phosphoglycerate mutase family protein
TGME49_312970	1.6427199	0.7160865	0.0006938814061761142	0.0013986926865306587	P1	0.7160865	hypothetical protein
TGME49_260480	1.6422237	0.7156507	6.834173267584469e-09	2.3079339231514767e-08	P1	0.7156507	leucine rich repeat-containing protein
TGME49_315260	1.6388159	0.71265376	0.00010300167517922505	0.00023094031021070742	P1	0.71265376	alanine dehydrogenase
TGME49_262890	1.6381931	0.71210545	1.0070494630265042e-05	2.5595966791218342e-05	P1	0.71210545	hypothetical protein
TGME49_300618	1.6374375	0.71143985	2.3979922282720273e-09	8.414392339005212e-09	P1	0.71143985	ribosomal protein S19
TGME49_257080	1.6372548	0.7112789	0.019690001153751795	0.030773824897221993	P1	0.7112789	3'5'-cyclic nucleotide phosphodiesterase domain-containing protein
TGME49_318480	1.6369171	0.71098125	0.006897083627456343	0.0117445097414307	P1	0.71098125	SWI2/SNF2-containing protein RAD5
TGME49_202450	1.6315271	0.7062229	0.021208969864524398	0.03289220702823597	P1	0.7062229	hypothetical protein
TGME49_212220	1.6310526	0.7058033	3.578274917155722e-08	1.1460792548463111e-07	P1	0.7058033	hypothetical protein
TGME49_235700	1.6310352	0.7057879	1.6944690244175398e-07	5.12222096643899e-07	P1	0.7057879	sedoheptulose-1%2C7-bisphosphatase
TGME49_245660	1.6304786	0.7052955	2.1616925594970773e-06	5.895271345661064e-06	P1	0.7052955	hypothetical protein
TGME49_226280	1.6304353	0.70525724	0.0008153349496568932	0.001626817619844583	P1	0.70525724	ribosomal protein L28 putative
TGME49_288220	1.63004	0.7049074	0.022022692056599343	0.03402920913099855	P1	0.7049074	hypothetical protein
TGME49_203870	1.6263074	0.70159996	2.764225408767682e-06	7.4613767345643475e-06	P1	0.70159996	RAB43 member RAS oncogene family protein
TGME49_227020	1.6262141	0.7015172	7.097431435382118e-15	3.5035012216970995e-14	P1	0.7015172	histone deacetylase SIR2
TGME49_209850	1.6247082	0.7001806	8.019625683176558e-15	3.942593627480163e-14	P1	0.7001806	RNA recognition motif-containing protein
TGME49_308950	1.6244643	0.69996405	4.4450697586121137e-07	1.2941419917696626e-06	P1	0.69996405	histidine acid phosphatase superfamily protein
TGME49_288830	1.6236186	0.6992128	8.470120476617051e-07	2.407087400589085e-06	P1	0.6992128	NADH dehydrogenase (NDH2-II)
TGME49_313350	1.6229855	0.6986501	0.00011926210701825434	0.0002655649237743676	P1	0.6986501	hypothetical protein
TGME49_240540	1.6223478	0.69808316	7.423867483543724e-05	0.0001699701403253193	P1	0.69808316	hypothetical protein
TGME49_246990	1.621531	0.6973566	7.345417325685492e-08	2.291813621453257e-07	P1	0.6973566	hypothetical protein
TGME49_234490	1.6202432	0.6962104	0.0018553807092463387	0.003499451869203791	P1	0.6962104	kelch repeat-containing protein
TGME49_304920	1.6201142	0.6960955	0.0006452933106112199	0.0013073032625143593	P1	0.6960955	hypothetical protein
TGME49_207480	1.6200238	0.69601506	4.653715398596806e-16	2.453513124628503e-15	P1	0.69601506	GCC2 and GCC3 domain-containing protein
TGME49_265850	1.6192117	0.6952916	7.957405531980925e-05	0.000181545778290413	P1	0.6952916	hypothetical protein
TGME49_306320	1.6173424	0.6936251	1.2281240164838688e-09	4.3822287466086845e-09	P1	0.6936251	Myb family DNA-binding domain-containing protein
TGME49_220570	1.6163468	0.6927368	4.2262441014804947e-07	1.233409042194342e-06	P1	0.6927368	hypothetical protein
TGME49_301890	1.6162786	0.69267595	1.5527348176046276e-19	9.503187151803394e-19	P1	0.69267595	Toxoplasma gondii family B protein
TGME49_304930	1.6135253	0.6902162	1.4173652232976767e-07	4.312343903448191e-07	P1	0.6902162	hypothetical protein
TGME49_252250	1.6123174	0.6891358	1.0063021612096064e-23	7.172344349009566e-23	P1	0.6891358	ATPase AAA family protein
TGME49_218210	1.61169	0.6885743	0.004664566188109453	0.008178726598458053	P1	0.6885743	Chromosome-associated kinesin KLP1 putative
TGME49_207760	1.6111271	0.6880703	1.6536405374531957e-09	5.8486800583457665e-09	P1	0.6880703	DnaJ C terminal region domain-containing protein
TGME49_290180	1.6078162	0.6851025	0.0011259647070054513	0.0021988203272527264	P1	0.6851025	AP2 domain transcription factor AP2IX-6
TGME49_218560	1.6050978	0.6826612	1.0673215467547086e-06	2.9998661510450147e-06	P1	0.6826612	acetyl-coA carboxylase ACC2
TGME49_254660	1.6037483	0.68144774	1.0446326025805065e-12	4.597689922561208e-12	P1	0.68144774	ankyrin repeat-containing protein
TGME49_223560	1.602422	0.6802541	1.5845721947005073e-10	6.061275704909639e-10	P1	0.6802541	hypothetical protein
TGME49_286932	1.6016434	0.67955303	0.00848757674508438	0.014198073517326734	P1	0.67955303	ATPase family associated with various cellular activities (AAA) domain-containing protein
TGME49_254690	1.6014401	0.6793698	1.481053756191739e-07	4.501252257932864e-07	P1	0.6793698	phospholipase/carboxylesterase
TGME49_242100	1.6010822	0.6790474	8.651605217197801e-11	3.3829378548357696e-10	P1	0.6790474	hypothetical protein
TGME49_229630	1.6010741	0.6790401	1.0911514687389421e-13	5.052557732987448e-13	P1	0.6790401	eIF2 kinase IF2K-A (incomplete catalytic triad)
TGME49_286760	1.5983897	0.67661923	4.816359414879979e-08	1.522986582481329e-07	P1	0.67661923	hypothetical protein
TGME49_312530	1.597612	0.6759171	0.011401517791390967	0.018629758031744652	P1	0.6759171	splicing factor CC1 family protein
TGME49_273478	1.5961623	0.6746074	0.027750299165518133	0.04194327608302902	P1	0.6746074	dynein heavy chain n-terminal region 2 protein
TGME49_255210	1.5949432	0.673505	0.015502963851012517	0.024728618070944616	P1	0.673505	ATPase AAA family protein
TGME49_294830	1.5935996	0.67228913	1.156745738199523e-27	9.412210505619625e-27	P1	0.67228913	methyltransferase domain-containing protein
TGME49_316510	1.5915732	0.67045355	5.390716612595034e-24	3.888129163960517e-23	P1	0.67045355	hypothetical protein
TGME49_260390	1.5913354	0.67023796	0.008115490814710512	0.013632345946906323	P1	0.67023796	hypothetical protein
TGME49_311765	1.5890857	0.6681969	7.425021097652465e-05	0.00016995048290182309	P1	0.6681969	hypothetical protein
TGME49_288530	1.5888338	0.6679683	0.007487489601722678	0.012668136453555637	P1	0.6679683	NOL1/NOP2/sun family protein
TGME49_242010	1.5847372	0.6642436	0.02337517519294217	0.035915359228595525	P1	0.6642436	glucose inhibited division protein A subfamily protein
TGME49_310180	1.5822909	0.66201484	1.6006117176687244e-18	9.427312808528623e-18	P1	0.66201484	hypothetical protein
TGME49_319695	1.5794247	0.65939915	0.0001118123882798867	0.00024976657799839275	P1	0.65939915	hypothetical protein
TGME49_272530	1.5790975	0.6591003	0.009168354582854513	0.01524029183365267	P1	0.6591003	hypothetical protein
TGME49_264670	1.5776737	0.6577988	8.169075685066027e-06	2.093960947983844e-05	P1	0.6577988	DNA polymerase family B protein
TGME49_225250	1.5776626	0.6577887	1.0791154354390523e-06	3.032005644616845e-06	P1	0.6577887	LSU ribosomal protein L14P putative
TGME49_264450	1.5773814	0.6575315	0.00020467068071536255	0.00044312959992872395	P1	0.6575315	DNA topoisomerase III beta-1 putative
TGME49_295000	1.5748731	0.6552356	0.0038621166271924144	0.006877384995417907	P1	0.6552356	hypothetical protein
TGME49_306230	1.5741343	0.65455866	8.303473786720146e-07	2.3629090162614e-06	P1	0.65455866	hypothetical protein
TGME49_225530	1.5721596	0.65274775	0.0005516451241211739	0.001129227997655704	P1	0.65274775	metal cation transporter ZIP family protein
TGME49_263840	1.5721552	0.6527437	0.018046694865407394	0.028474198549081047	P1	0.6527437	hypothetical protein
TGME49_318660	1.5711433	0.6518147	1.0751658643605914e-19	6.633200066025971e-19	P1	0.6518147	PP2C putative
TGME49_205398	1.5699471	0.65071595	0.0010076470423026915	0.0019828953679609813	P1	0.65071595	DNA repair and recombination protein RAD54 putative
TGME49_257010	1.569161	0.6499934	0.03181075458990831	0.0474269432067724	P1	0.6499934	sporozoite developmental protein
TGME49_224150	1.5688848	0.6497395	0.01119147232630148	0.018311347397896607	P1	0.6497395	hypothetical protein
TGME49_224320	1.566361	0.6474167	0.0001700355295081753	0.00037214824623634326	P1	0.6474167	hypothetical protein
TGME49_213930	1.5661254	0.64719975	0.0035479003770055233	0.006351328228950541	P1	0.64719975	3' exoribonuclease family domain 1 domain-containing protein
TGME49_233280	1.5659901	0.64707506	1.9756448811288253e-05	4.845033875149262e-05	P1	0.64707506	hypothetical protein
TGME49_293700	1.5647149	0.64589983	0.0005443436261397949	0.0011148220820506082	P1	0.64589983	WD domain G-beta repeat-containing protein
TGME49_321290	1.5568253	0.638607	0.030202224032388786	0.04526046560992826	P1	0.638607	Prp18 domain-containing protein
TGME49_267270	1.5558486	0.6377017	1.0973132798828486e-05	2.770675025976245e-05	P1	0.6377017	divalent metal transporter putative
TGME49_208350	1.5551776	0.63707936	0.00011178683510342577	0.0002497755580115169	P1	0.63707936	hypothetical protein
TGME49_288270	1.5549594	0.63687694	0.015021076106593976	0.024000758379926736	P1	0.63687694	hypothetical protein
TGME49_228120	1.5549542	0.63687205	4.975658882908295e-28	4.111977977010123e-27	P1	0.63687205	hypothetical protein
TGME49_217760	1.5546039	0.6365471	1.80868627266787e-08	5.9463465391019195e-08	P1	0.6365471	GTP-binding protein
TGME49_234470	1.5486803	0.6310394	0.00142587905289706	0.002735796111033296	P1	0.6310394	hypothetical protein
TGME49_249600	1.5474457	0.6298888	2.155716338572431e-05	5.257632167364352e-05	P1	0.6298888	hypothetical protein
TGME49_207430	1.5474021	0.6298482	3.212658942538437e-07	9.480823699748302e-07	P1	0.6298482	ATP-dependent RNA helicase DDX1 putative
TGME49_288250	1.5473533	0.6298026	0.018756004361984966	0.02945578520664281	P1	0.6298026	hypothetical protein
TGME49_289850	1.5471565	0.6296191	0.0027568648302045626	0.0050552497516082795	P1	0.6296191	hypothetical protein
TGME49_297100	1.5450035	0.62761015	0.018605222967671843	0.029267966694907128	P1	0.62761015	hypothetical protein
TGME49_315130	1.5439986	0.62667143	2.2619073945372222e-07	6.750554718820275e-07	P1	0.62667143	L-isoaspartyl protein carboxyl methyltransferase family protein
TGME49_233520	1.542681	0.62543976	0.022401783125036434	0.034577021248914055	P1	0.62543976	ATP-dependent RNA helicase
TGME49_292360	1.5399253	0.62286043	1.760852462012698e-75	4.520413341689741e-74	P1	0.62286043	hypothetical protein
TGME49_219710	1.5388179	0.6218225	0.009502652487396623	0.01574331167292112	P1	0.6218225	hypothetical protein
TGME49_247000	1.5387813	0.62178814	0.00029031887783718946	0.0006167085619247742	P1	0.62178814	tetratricopeptide repeat-containing protein
TGME49_311460	1.5387125	0.62172365	0.008644724910688717	0.014438075261158178	P1	0.62172365	hypothetical protein
TGME49_297720	1.5372547	0.6203562	0.0041850379961556996	0.007393187809146839	P1	0.6203562	trehalose-phosphatase
TGME49_313630	1.5354562	0.61866736	6.810540551300546e-08	2.1296492223726183e-07	P1	0.61866736	hypothetical protein
TGME49_288920	1.5349709	0.61821127	0.0012497239545069985	0.0024220212298683135	P1	0.61821127	ATP-binding cassette G family transporter ABCG96
TGME49_320100	1.5338893	0.61719435	2.4411525406304606e-21	1.6057612428477314e-20	P1	0.61719435	RNA recognition motif-containing protein
TGME49_205390	1.5320581	0.615471	0.0012625592421136953	0.0024446527645328453	P1	0.615471	hypothetical protein
TGME49_204055	1.5311583	0.6146234	0.0015037339309405037	0.002873424611023415	P1	0.6146234	hypothetical protein
TGME49_300615	1.529932	0.6134676	2.3527532797697586e-25	1.7805872939906256e-24	P1	0.6134676	ribosomal protein S3 putative
TGME49_216120	1.5297618	0.613307	0.0008123118909890375	0.001621168769209218	P1	0.613307	hypothetical protein
TGME49_265460	1.5292636	0.61283714	8.749374484575571e-05	0.00019822214832812573	P1	0.61283714	hypothetical protein
TGME49_238870	1.527155	0.6108465	0.01041223731649788	0.01711595102669153	P1	0.6108465	hypothetical protein
TGME49_208310	1.5265722	0.6102959	0.011737602583764058	0.019138183672291743	P1	0.6102959	hypothetical protein
TGME49_231150	1.5263327	0.6100695	0.031067299395697957	0.046425054970995215	P1	0.6100695	hypothetical protein
TGME49_247550	1.5249801	0.6087904	2.1252280022343306e-14	1.0245248691136504e-13	P1	0.6087904	heat shock protein HSP60
TGME49_216810	1.5247695	0.6085912	3.9124987559376326e-11	1.574319413656467e-10	P1	0.6085912	5'-nucleotidase C-terminal domain-containing protein
TGME49_283780	1.5213947	0.6053945	2.529613838586229e-16	1.350513178299576e-15	P1	0.6053945	glucose-6-phosphate isomerase GPI
TGME49_249160	1.5213511	0.6053531	0.02615175027817669	0.03976911826602094	P1	0.6053531	UAA transporter family protein
TGME49_256830	1.5179518	0.60212606	0.010915915853371488	0.017888208245552113	P1	0.60212606	SacI domain-containing protein
TGME49_239080	1.5179124	0.6020885	7.185311471313226e-10	2.606835940150838e-09	P1	0.6020885	carrier superfamily protein
TGME49_295040	1.5169286	0.60115314	0.0009208232569550116	0.0018247942816147415	P1	0.60115314	HEAT repeat-containing protein
TGME49_310250	1.5164452	0.60069335	0.007650502126192312	0.012928399551384607	P1	0.60069335	hypothetical protein
TGME49_232750	1.5161425	0.60040534	0.00721318834662737	0.012235908571121664	P1	0.60040534	23S rRNA (adenine(1618)-N(6))-methyltransferase putative
TGME49_230660	1.5159225	0.60019606	0.0009981969741806645	0.00196659007322834	P1	0.60019606	hypothetical protein
TGME49_268840	1.5156714	0.599957	0.028349549437420345	0.042757195455080756	P1	0.599957	N6-adenosine-methyltransferase putative
TGME49_202400	1.5141417	0.59850025	2.3353680090087177e-05	5.669594194908775e-05	P1	0.59850025	calcium binding egf domain-containing protein
TGME49_219200	1.5128611	0.59727955	0.003862608019985227	0.006876810146879264	P1	0.59727955	DEAD/DEAH box RNA helicase family protein
TGME49_205562	1.5100157	0.5945636	0.027688234129890226	0.04187944582038912	P1	0.5945636	hypothetical protein
TGME49_247652	1.5077941	0.5924395	0.00922265600601044	0.015321509171275406	P1	0.5924395	hypothetical protein
TGME49_311860	1.5072281	0.59189785	0.010829477083639232	0.01775000260982281	P1	0.59189785	hypothetical protein
TGME49_275990	1.5065358	0.5912349	0.011129059161576738	0.01821981656884612	P1	0.5912349	hypothetical protein
TGME49_311870	1.5060087	0.59073013	9.48257489414966e-11	3.699299194271964e-10	P1	0.59073013	WD domain G-beta repeat-containing protein
TGME49_311500	1.5052105	0.5899653	0.0004448467570641639	0.0009211021598832872	P1	0.5899653	ThiF family protein
TGME49_219120	1.5051017	0.5898609	8.696174181220597e-14	4.044487177014822e-13	P1	0.5898609	zinc finger (CCCH type) motif-containing protein
TGME49_306610	1.5044501	0.58923626	0.00030741840953711316	0.0006513938502133612	P1	0.58923626	3' exoribonuclease family domain 1 domain-containing protein
TGME49_262130	1.5043535	0.58914363	0.017979512875893885	0.028378801298785228	P1	0.58914363	hypothetical protein
TGME49_275970	1.5009819	0.5859066	0.006418089837035882	0.010995372568682568	P1	0.5859066	tubulin putative
TGME49_254570	1.4994334	0.58441746	0.0010743841424132082	0.002104905698636501	P1	0.58441746	hypothetical protein
TGME49_235000	1.4955803	0.5807054	0.00020107132975998772	0.0004361192735369431	P1	0.5807054	phosphorylase family protein
TGME49_293252	1.4949604	0.5801073	4.602918799908563e-06	1.2137449948182243e-05	P1	0.5801073	hypothetical protein
TGME49_316890	1.4935939	0.5787879	0.017696145531948558	0.027968122223584867	P1	0.5787879	hypothetical protein
TGME49_275350	1.4931197	0.5783298	0.00038199119869234804	0.000798193385491235	P1	0.5783298	TBC domain-containing protein
TGME49_206670	1.4926447	0.5778708	0.00011420296200891738	0.0002547697351102261	P1	0.5778708	hypothetical protein
TGME49_255430	1.491689	0.57694674	0.0005927032777388273	0.0012074220655528547	P1	0.57694674	Rad9 protein
TGME49_205500	1.491515	0.57677853	5.468162771592863e-11	2.1723472610006263e-10	P1	0.57677853	hypothetical protein
TGME49_309960	1.4910764	0.57635415	0.00021978935744316385	0.0004746461040564975	P1	0.57635415	hypothetical protein
TGME49_262030	1.4907063	0.57599604	7.468574169837038e-07	2.13467267135173e-06	P1	0.57599604	ALG6 ALG8 glycosyltransferase family protein
TGME49_232310	1.488729	0.5740812	0.030469347698109654	0.045628388414580515	P1	0.5740812	endonuclease/exonuclease/phosphatase family protein
TGME49_294410	1.4886214	0.5739769	0.0018118630307340546	0.0034204280638309844	P1	0.5739769	hypothetical protein
TGME49_278530	1.4873912	0.5727842	1.2589246429033638e-34	1.2658187540430727e-33	P1	0.5727842	multiprotein bridging factor type 1 family transcriptional co-activator putative
TGME49_274010	1.4872994	0.57269514	0.0017064093437682165	0.0032350916537522683	P1	0.57269514	hypothetical protein
TGME49_240050	1.4868844	0.57229245	2.44139496775299e-08	7.949121780124036e-08	P1	0.57229245	hypothetical protein
TGME49_242000	1.4865623	0.5719799	6.83637750930997e-17	3.7763273017417924e-16	P1	0.5719799	DUF51 family protein
TGME49_292280	1.4864377	0.571859	9.317509056094781e-07	2.634606008964731e-06	P1	0.571859	SAG-related sequence SRS36D
TGME49_300604	1.4861488	0.5715786	1.2715905148294638e-14	6.190117284293747e-14	P1	0.5715786	ribosomal protein L36
TGME49_242750	1.4857671	0.571208	0.02336386684270617	0.03590451589401315	P1	0.571208	hypothetical protein
TGME49_295400	1.4848781	0.57034445	0.0014488794722881328	0.0027767724127400885	P1	0.57034445	hypothetical protein
TGME49_266470	1.4842399	0.5697243	0.0006861488463342295	0.0013840967652588732	P1	0.5697243	hypothetical protein
TGME49_232760	1.4811162	0.56668484	0.00478531041916848	0.008379998299874972	P1	0.56668484	protein phosphatase inhibitor IPP2
TGME49_208420	1.4811018	0.5666708	2.7495238090623128e-33	2.675400701767315e-32	P1	0.5666708	Sodium:neurotransmitter symporter family protein
TGME49_249530	1.4796208	0.5652275	2.408578292845416e-06	6.5474258968047585e-06	P1	0.5652275	exportin 1 putative
TGME49_305850	1.4779752	0.5636221	1.3622209692604485e-14	6.619860935773159e-14	P1	0.5636221	RNA recognition motif-containing protein
TGME49_244850	1.4766269	0.56230533	0.02178853879077352	0.03371674580924755	P1	0.56230533	GMC oxidoreductase
TGME49_300612	1.4765663	0.56224614	2.987177123838216e-21	1.9603494940122435e-20	P1	0.56224614	ribosomal protein S17
TGME49_222000	1.476389	0.56207293	0.0012495567275923637	0.002422252954153111	P1	0.56207293	brix domain-containing protein
TGME49_310770	1.4754299	0.56113535	1.4378512449023217e-06	3.9842820257365515e-06	P1	0.56113535	hypothetical protein
TGME49_249200	1.4751096	0.5608221	5.1201169965213845e-12	2.1719994049532703e-11	P1	0.5608221	Ctr copper transporter family protein
TGME49_313810	1.4750676	0.56078106	4.189963063462768e-05	9.893326260555366e-05	P1	0.56078106	transcription initiation factor TFIID complex subunit TAF8
TGME49_278550	1.4744178	0.5601454	0.014051562993840595	0.022592709127351545	P1	0.5601454	elongation factor Tu GTP binding domain-containing protein
TGME49_301300	1.4734547	0.5592027	0.02911077511825132	0.04378799762221739	P1	0.5592027	hypothetical protein
TGME49_216740	1.4727361	0.558499	0.005703677167371646	0.009871569130250188	P1	0.558499	riboflavin kinase
TGME49_299040	1.4724153	0.5581846	2.3112075485988005e-10	8.761426820226872e-10	P1	0.5581846	phosphatidylinositol n-acetylglucosaminyltransferase
TGME49_215490	1.4706001	0.556405	8.303698264670727e-31	7.45303247007534e-30	P1	0.556405	transporter major facilitator family protein
TGME49_313418	1.4701767	0.55598956	1.64592682510579e-05	4.071909187124634e-05	P1	0.55598956	hypothetical protein
TGME49_213970	1.4678448	0.5536995	3.0259496364497217e-06	8.097962810346753e-06	P1	0.5536995	ribosomal RNA small subunit methyltransferase B putative
TGME49_274060	1.4675177	0.553378	3.0224221573532564e-12	1.298442397813103e-11	P1	0.553378	2-oxoglutarate/malate translocase OMT
TGME49_292975	1.4671837	0.5530495	0.023428046889467632	0.03599004802263435	P1	0.5530495	hypothetical protein
TGME49_216710	1.4671131	0.5529801	0.0004924017335867625	0.0010143475711887307	P1	0.5529801	transporter major facilitator family protein
TGME49_265270	1.4665906	0.5524663	0.0054765335638644955	0.009494007077257702	P1	0.5524663	hypothetical protein
TGME49_311440	1.4650551	0.55095494	1.153143413163961e-05	2.9038310279018528e-05	P1	0.55095494	SAG-related sequence SRS50
TGME49_269600	1.4645799	0.5504869	0.0014347911324786053	0.002750396256222038	P1	0.5504869	biotin-requiring enzyme domain-containing protein
TGME49_272730	1.4644934	0.5504017	0.03077849818318195	0.0460423655074663	P1	0.5504017	hypothetical protein
TGME49_302060	1.4632571	0.54918325	2.5520286426817502e-09	8.94374851290044e-09	P1	0.54918325	elongation factor tu apicoplast putative
TGME49_321300	1.4628958	0.54882693	0.0032177261433366973	0.0058095158201414586	P1	0.54882693	autophagy-related 12 variant 1 putative
TGME49_269900	1.4626281	0.548563	0.0030578206179068344	0.0055540543954497035	P1	0.548563	WD domain G-beta repeat-containing protein
TGME49_289010	1.4609182	0.54687536	0.024320599330670222	0.037185333444395494	P1	0.54687536	RNA recognition motif-containing protein
TGME49_300613	1.4595368	0.54551053	2.5934954320002065e-18	1.5106663737016376e-17	P1	0.54551053	ribosomal protein L16 putative
TGME49_285840	1.4591458	0.54512405	0.0130392460046822	0.021089519677431227	P1	0.54512405	RAP domain-containing protein
TGME49_224730	1.4581418	0.54413104	1.306420673170874e-05	3.270310908595496e-05	P1	0.54413104	hypothetical protein
TGME49_261520	1.455844	0.5418558	5.11887330592749e-06	1.3439230320753366e-05	P1	0.5418558	nucleolar GTP-binding protein 1 putative
TGME49_245650	1.4551892	0.5412068	1.0639536331765e-05	2.691270555797759e-05	P1	0.5412068	hypothetical protein
TGME49_305820	1.4540182	0.5400454	3.44662779835127e-05	8.21162718896328e-05	P1	0.5400454	SGS domain-containing protein
TGME49_267030	1.451554	0.53759813	2.3820968231639044e-09	8.365567471285795e-09	P1	0.53759813	ribonuclease type III Dicer
TGME49_288390	1.4511852	0.5372317	0.002465905812830697	0.004555345690106751	P1	0.5372317	B3GNTL1 protein
TGME49_233860	1.4506178	0.53666747	0.0032122849524535272	0.005802172521048437	P1	0.53666747	DALR anticodon binding domain-containing protein
TGME49_293258	1.4504048	0.53645563	2.5269299430402003e-08	8.211793112319174e-08	P1	0.53645563	hypothetical protein
TGME49_236980	1.4494042	0.53546	7.645553886081042e-06	1.967530412000015e-05	P1	0.53546	AMP-binding enzyme domain-containing protein
TGME49_225730	1.4483901	0.53445023	6.906608586676614e-16	3.585323670748044e-15	P1	0.53445023	membrane protein putative
TGME49_277820	1.4471787	0.5332431	0.001963597513233917	0.0036887332288197644	P1	0.5332431	hypothetical protein
TGME49_247040	1.4454758	0.53154445	0.0006241247764055629	0.001268372921444029	P1	0.53154445	hypothetical protein
TGME49_212860	1.4434189	0.52949	0.0003947122723509635	0.0008229424468714484	P1	0.52949	hypothetical protein
TGME49_203290	1.4427043	0.5287757	4.918806408294131e-65	1.0182411501091233e-63	P1	0.5287757	hypothetical protein
TGME49_300608	1.4413097	0.52738035	5.9640360912370085e-15	2.9526523345010415e-14	P1	0.52738035	ribosomal protein L6 putative
TGME49_301222	1.4407824	0.5268525	0.005926883701355486	0.010226447342522663	P1	0.5268525	DNA repair protein Rad4 domain-containing protein
TGME49_289290	1.4404086	0.5264781	0.0008654702928346819	0.0017211589576834761	P1	0.5264781	hypothetical protein
TGME49_240890	1.4400481	0.526117	8.639481462141008e-11	3.3797619466995345e-10	P1	0.526117	6-phosphofructokinase
TGME49_214320	1.439968	0.52603674	5.613693018505767e-21	3.644369810476534e-20	P1	0.52603674	facilitative glucose transporter GT1
TGME49_310660	1.4399335	0.5260022	3.0813709941142276e-05	7.372594735492568e-05	P1	0.5260022	Dullard family phosphatase domain-containing protein
TGME49_203320	1.4398998	0.52596843	5.598750956430397e-10	2.0497204411795026e-09	P1	0.52596843	zinc finger in N-recognin protein
TGME49_321680	1.4393598	0.5254272	2.703357577724457e-17	1.5110892191569004e-16	P1	0.5254272	hypothetical protein
TGME49_214100	1.4373115	0.52337277	1.550448384110281e-05	3.844711406986328e-05	P1	0.52337277	hypothetical protein
TGME49_267690	1.4360834	0.52213955	0.00016295914190154253	0.00035740143144648875	P1	0.52213955	hypothetical protein
TGME49_202700	1.4345325	0.52058065	9.085336886692194e-07	2.5749917901007474e-06	P1	0.52058065	hypothetical protein
TGME49_264640	1.4345297	0.5205778	1.2967558587380335e-11	5.3504640854428096e-11	P1	0.5205778	bromodomain-containing protein
TGME49_249665	1.4342428	0.5202893	0.010406016269698878	0.017109054587089105	P1	0.5202893	hypothetical protein
TGME49_217620	1.4341851	0.52023125	0.005022876005527094	0.00876874963676764	P1	0.52023125	hypothetical protein
TGME49_265090	1.4335498	0.51959205	1.4709853272602829e-08	4.8606972120658636e-08	P1	0.51959205	hypothetical protein
TGME49_316530	1.4293355	0.51534456	7.540528824866093e-11	2.97049003987029e-10	P1	0.51534456	myosin heavy chain putative
TGME49_278720	1.4260502	0.51202476	0.009700232720144338	0.01603604728016032	P1	0.51202476	hypothetical protein
TGME49_306300	1.4252539	0.5112189	4.3561458998622895e-05	0.00010268492400289394	P1	0.5112189	hypothetical protein
TGME49_275700	1.4249661	0.5109276	0.02118844026897119	0.03287244057893656	P1	0.5109276	hypothetical protein
TGME49_243482	1.4243023	0.51025546	0.0012998445029281027	0.002512239512981866	P1	0.51025546	dynein heavy chain putative
TGME49_248710	1.4236774	0.50962234	3.426553662143358e-07	1.0094409567653577e-06	P1	0.50962234	hypothetical protein
TGME49_243600	1.4220598	0.50798213	2.102806400957471e-14	1.0142948522265448e-13	P1	0.50798213	acetyltransferase GNAT family protein
TGME49_207370	1.4217756	0.50769377	3.927878392472002e-11	1.5797552810865964e-10	P1	0.50769377	hypothetical protein
TGME49_302000	1.4182161	0.50407743	5.405729592494384e-26	4.1695700582837965e-25	P1	0.50407743	chaperone clp putative
TGME49_224960	1.4178554	0.5037104	4.570340376481836e-05	0.00010746407243810018	P1	0.5037104	hypothetical protein
TGME49_298020	1.4172183	0.503062	0.007872409832597191	0.013271531625971235	P1	0.503062	DEAD-family helicase
TGME49_275600	1.4148153	0.5006137	0.016124342641534235	0.025647118258078746	P1	0.5006137	diacylglycerol acyltransferase
TGME49_321520	1.4135514	0.4993244	2.5100674871324598e-37	2.6972048341375007e-36	P1	0.4993244	hypothetical protein
TGME49_255900	1.4128929	0.49865216	2.1408224063530303e-16	1.1480245107338217e-15	P1	0.49865216	Bax inhibitor-1 putative
TGME49_294050	1.412551	0.498303	0.025601173318334756	0.038988011151578676	P1	0.498303	hypothetical protein
TGME49_254400	1.4121877	0.4979318	0.00148440951979745	0.002839710714430184	P1	0.4979318	LSU ribosomal protein L2P putative
TGME49_311220	1.4120466	0.49778765	0.020251654956299305	0.03157568354456414	P1	0.49778765	hypothetical protein
TGME49_260320	1.4111407	0.49686185	6.201596899433267e-06	1.612147965916078e-05	P1	0.49686185	Noc2p family protein
TGME49_233040	1.4095017	0.49518517	2.50721667889762e-06	6.800241512514226e-06	P1	0.49518517	3'5'-cyclic nucleotide phosphodiesterase domain-containing protein
TGME49_244870	1.4088203	0.49448758	0.01588122162606614	0.025288989037284056	P1	0.49448758	quinone oxidoreductase putative
TGME49_250700	1.407296	0.49292576	0.0037780498184307415	0.006737628540216647	P1	0.49292576	hypothetical protein
TGME49_233430	1.4049001	0.49046752	4.922443906978222e-21	3.2005358920968484e-20	P1	0.49046752	hypothetical protein
TGME49_317720	1.4033448	0.48886946	2.890343966275398e-15	1.452221602567639e-14	P1	0.48886946	eukaryotic translation initiation factor 3 subunit 7 putative
TGME49_230000	1.4021511	0.48764184	0.01653221102031365	0.026256309567049472	P1	0.48764184	hypothetical protein
TGME49_300601	1.4017643	0.48724374	8.824282254586884e-21	5.676305249218646e-20	P1	0.48724374	ribosomal protein S11
TGME49_302005	1.4016371	0.48711282	2.1653805596189556e-10	8.219687283838966e-10	P1	0.48711282	ORF F
TGME49_244880	1.4015853	0.4870596	0.00028225518096570816	0.0006007881195656178	P1	0.4870596	DNA-directed RNA polymerase I RPA1
TGME49_218420	1.4014236	0.4868931	0.00028743392553700356	0.0006111950994676566	P1	0.4868931	WD domain G-beta repeat-containing protein
TGME49_244860	1.399636	0.4850517	0.014980118582397865	0.023953442170945166	P1	0.4850517	hypothetical protein
TGME49_264140	1.3980722	0.48343894	6.809465599932696e-07	1.9528946165375736e-06	P1	0.48343894	hypothetical protein
TGME49_280780	1.3960164	0.48131585	0.003779416335653398	0.006738642679106735	P1	0.48131585	dihydrouridine synthase (dus) protein
TGME49_226825	1.3957106	0.48099983	0.006426436607179932	0.011002976603333004	P1	0.48099983	protein phosphatase inhibitor protein
TGME49_203940	1.3951491	0.48041934	0.005137526983472093	0.008944867636034899	P1	0.48041934	ABC1 protein
TGME49_200295	1.3944019	0.47964644	1.5524531990479168e-06	4.28917884172676e-06	P1	0.47964644	hypothetical protein
TGME49_231200	1.3939246	0.47915253	0.004934038958126098	0.008619005799448404	P1	0.47915253	hypothetical protein
TGME49_239930	1.3925633	0.47774294	0.0027174557367762226	0.00498840059830732	P1	0.47774294	beta-catenin family protein 1 putative
TGME49_295010	1.3901614	0.4752524	0.028358309769349763	0.042762771703611514	P1	0.4752524	DEAD/DEAH box helicase domain-containing protein
TGME49_321640	1.3892784	0.47433573	4.397074567371229e-09	1.5096622681307885e-08	P1	0.47433573	cell division protein CDC48AP
TGME49_306240	1.3887968	0.47383556	3.417579636471284e-11	1.381755749623574e-10	P1	0.47383556	hypothetical protein
TGME49_266120	1.3852054	0.47009993	3.011428778311992e-06	8.061656881655494e-06	P1	0.47009993	thioredoxin-dependent peroxidase TPX1/2
TGME49_246780	1.3851597	0.47005236	1.5696649568590863e-08	5.182717054586335e-08	P1	0.47005236	hypothetical protein
TGME49_255340	1.3848048	0.4696827	0.024128054561510678	0.03690430076539645	P1	0.4696827	tetratricopeptide repeat-containing protein
TGME49_289670	1.3846483	0.46951962	2.2522981928472804e-30	2.0045216582495396e-29	P1	0.46951962	DNA repair metallo-beta-lactamase
TGME49_224510	1.3826848	0.4674723	0.00023789192902087203	0.0005113859079944732	P1	0.4674723	hypothetical protein
TGME49_235580	1.380741	0.46544272	4.867908429907875e-13	2.1846097023911753e-12	P1	0.46544272	hypothetical protein
TGME49_300621	1.3796668	0.46431988	4.0130720158032415e-21	2.6193513327259798e-20	P1	0.46431988	ribosomal protein L2
TGME49_202880	1.3788797	0.46349657	8.649166761411506e-05	0.00019605706512850664	P1	0.46349657	carrier superfamily protein
TGME49_320460	1.3763185	0.4608143	1.265192083167721e-05	3.171805382735106e-05	P1	0.4608143	ABC transporter transmembrane region domain-containing protein
TGME49_265870	1.3736813	0.45804733	0.00735578222398828	0.012460276105857404	P1	0.45804733	pantoate-beta-alanine ligase
TGME49_306570	1.3729445	0.45727327	0.0020983357099977596	0.003926128357696295	P1	0.45727327	hypothetical protein
TGME49_302050	1.3711289	0.45536423	6.1626433899919564e-18	3.531186300669747e-17	P1	0.45536423	elongation factor tu apicoplast putative
TGME49_291970	1.37013	0.4543127	2.6336207993040287e-06	7.1224980054184515e-06	P1	0.4543127	hypothetical protein
TGME49_208750	1.3677651	0.45182043	0.0006750330381054075	0.001363628088935248	P1	0.45182043	RWD domain-containing protein
TGME49_293610	1.365838	0.44978645	0.023691544126929538	0.03633535167896257	P1	0.44978645	dihydroorotase
TGME49_355200	1.3646326	0.4485126	1.0382649593023055e-24	7.672078605658156e-24	P1	0.4485126	hypothetical protein
TGME49_318140	1.3633667	0.44717368	9.63455088880689e-05	0.00021705365912740197	P1	0.44717368	SART-1 family protein
TGME49_226440	1.3630205	0.44680732	0.013895690571767646	0.02236763914029913	P1	0.44680732	SWI2/SNF2-containing protein RAD16
TGME49_302003	1.3585516	0.44206935	1.47747590136546e-16	8.030091031488208e-16	P1	0.44206935	ORF E
TGME49_233050	1.3573958	0.4408414	0.029904966667335962	0.04487870441938869	P1	0.4408414	hypothetical protein
TGME49_293350	1.3571666	0.4405979	0.0009213720071186851	0.0018254534300080729	P1	0.4405979	mitochondrial carrier superfamily protein
TGME49_209690	1.3555019	0.4388271	0.0025145030373331777	0.004640046461288184	P1	0.4388271	small nuclear ribonucleoprotein
TGME49_305340	1.3539128	0.43713483	1.6064503402946553e-14	7.775403767408973e-14	P1	0.43713483	corepressor complex CRC230
TGME49_291320	1.3536428	0.43684712	8.661671212287444e-50	1.2700776919961762e-48	P1	0.43684712	hypothetical protein
TGME49_234530	1.3532094	0.43638507	2.3104815641234986e-16	1.2374335631317102e-15	P1	0.43638507	hypothetical protein
TGME49_288340	1.3530746	0.43624136	5.2690083327032664e-05	0.00012273040369004907	P1	0.43624136	UBX domain-containing protein
TGME49_306190	1.3522139	0.43532336	1.3411083580563376e-10	5.169786030188875e-10	P1	0.43532336	hypothetical protein
TGME49_275802	1.3485945	0.43145666	3.447903762744941e-05	8.212350586616969e-05	P1	0.43145666	SRP72 RNA-binding domain-containing protein
TGME49_231480	1.347137	0.42989656	0.021406560821746926	0.033162107978810446	P1	0.42989656	GCN1 putative
TGME49_309890	1.3459009	0.42857218	5.763718897330258e-16	3.0198740574969826e-15	P1	0.42857218	hypothetical protein
TGME49_218300	1.3439013	0.42642716	3.9133731276763014e-05	9.279154810879854e-05	P1	0.42642716	zinc finger (CCCH type) motif-containing protein
TGME49_313770	1.3437572	0.42627242	0.0001297770781244824	0.00028791626000509014	P1	0.42627242	hypothetical protein
TGME49_232160	1.3436624	0.42617068	0.01002134123269033	0.016508727921065443	P1	0.42617068	zinc finger C3HC4 type (RING finger) domain-containing protein
TGME49_224330	1.3433483	0.42583337	0.0007096235484986848	0.0014280391924278988	P1	0.42583337	proteasome activator pa28 beta subunit protein
TGME49_306660	1.342288	0.42469427	0.00036980727792619155	0.0007738831192677437	P1	0.42469427	RNA pseudouridine synthase superfamily protein
TGME49_223600	1.3415973	0.42395172	0.020124541410139758	0.03140067924441906	P1	0.42395172	hypothetical protein
TGME49_219310	1.3407819	0.4230746	0.0019417994342645023	0.0036510325070788032	P1	0.4230746	DnaK family protein
TGME49_315100	1.3349769	0.41681477	2.8301195541988717e-06	7.614905942900181e-06	P1	0.41681477	hypothetical protein
TGME49_306460	1.3338618	0.41560924	0.027337726020817944	0.041393767295057074	P1	0.41560924	bromodomain-containing protein
TGME49_300606	1.3335421	0.41526338	3.1503360689873764e-20	1.9826928791853487e-19	P1	0.41526338	ribosomal protein S5 putative
TGME49_269290	1.3333905	0.4150993	0.00019784167828536855	0.0004294450821892117	P1	0.4150993	hypothetical protein
TGME49_238200	1.3321394	0.41374502	1.9411037216784794e-16	1.0435749225522875e-15	P1	0.41374502	alpha/beta hydrolase fold domain-containing protein
TGME49_300690	1.329432	0.41081002	4.394835752502155e-21	2.8663152714774675e-20	P1	0.41081002	RNA polymerase C2 putative
TGME49_265530	1.3270576	0.408231	9.426913537778315e-10	3.3880728400032187e-09	P1	0.408231	RNA recognition motif-containing protein
TGME49_320240	1.3254315	0.40646207	1.4044829899454618e-05	3.508507344891858e-05	P1	0.40646207	SAG-related sequence SRS15B
TGME49_205510	1.3236406	0.40451145	3.0652961944789537e-08	9.892813014355843e-08	P1	0.40451145	nucleolar protein 5 putative
TGME49_300700	1.3208904	0.40151078	6.971665272396554e-12	2.932404626028949e-11	P1	0.40151078	ribosomal protein S2 putative
TGME49_259660	1.3183285	0.39870992	4.7222192198201063e-08	1.4948974336806829e-07	P1	0.39870992	orotate phosphoribosyltransferase
TGME49_257750	1.3182409	0.398614	0.00019253406422716412	0.0004185695512130317	P1	0.398614	homocysteine s-methyltransferase domain-containing protein
TGME49_263420	1.3137306	0.39366946	0.019759752925913667	0.030865706160951883	P1	0.39366946	ubiquitin-specific protease USP4
TGME49_282200	1.3136685	0.39360127	6.487805014208316e-13	2.891609559366936e-12	P1	0.39360127	ATPase AAA family protein
TGME49_355120	1.3135586	0.39348054	0.00013024413119493963	0.00028887655779213765	P1	0.39348054	tRNA-Ala
TGME49_267410	1.3123822	0.39218795	0.010086977841617203	0.016607137397719084	P1	0.39218795	scavenger receptor protein SR1 precursor
TGME49_305840	1.3087289	0.3881663	1.243839911454646e-09	4.4345596843165645e-09	P1	0.3881663	Nicotinate-nucleotide adenylyltransferase
TGME49_239410	1.3047084	0.38372734	0.019237941292769282	0.030128620834179377	P1	0.38372734	hypothetical protein
TGME49_249260	1.302645	0.38144392	0.0008804813153581626	0.0017501871474499978	P1	0.38144392	cell-cycle-associated protein kinase CDK putative
TGME49_234280	1.3010468	0.37967288	0.011244378871743167	0.018390786977293336	P1	0.37967288	AMP deaminase
TGME49_226072	1.2996936	0.37817153	0.02389370207567458	0.03659887699150299	P1	0.37817153	Ser/Thr phosphatase family protein
TGME49_207880	1.299197	0.37762016	0.0016283570624280293	0.0030968484010959548	P1	0.37762016	hypothetical protein
TGME49_321450	1.2955976	0.37361765	1.2333446333640725e-06	3.4458580130310806e-06	P1	0.37361765	Myb family DNA-binding domain-containing protein
TGME49_311400	1.2951144	0.37307957	2.7346876832968658e-05	6.584142580708475e-05	P1	0.37307957	WD domain G-beta repeat-containing protein
TGME49_300070	1.2927535	0.37044716	0.013095182502244932	0.021167829935686257	P1	0.37044716	hypothetical protein
TGME49_291600	1.2903242	0.3677336	0.0002366057329944929	0.0005087505144784844	P1	0.3677336	gamma interferon inducible lysosomal thiol reductase (GILT) protein
TGME49_302007	1.289454	0.3667603	1.021799161216237e-13	4.739217855921108e-13	P1	0.3667603	ribosomal protein L11 putative
TGME49_216170	1.2831355	0.35967356	0.0018953967127493883	0.0035677558805173462	P1	0.35967356	SufS subfamily cysteine desulfurase
TGME49_252350	1.2811954	0.35749054	0.024467964887514564	0.037383580217067294	P1	0.35749054	hypothetical protein
TGME49_279320	1.2799971	0.35614055	0.011126106209619305	0.018218513580156002	P1	0.35614055	hypothetical protein
TGME49_256760	1.279857	0.35598266	6.01548941969685e-43	7.493631805126784e-42	P1	0.35598266	pyruvate kinase PyK1
TGME49_242625	1.2787304	0.3547121	0.005881271863657776	0.010156046240125451	P1	0.3547121	ATPase family associated with various cellular activities (AAA) subfamily protein
TGME49_280790	1.2730476	0.34828633	7.907906101497643e-08	2.4600432756261176e-07	P1	0.34828633	phosphatidylinositol n-acetylglucosaminyltransferase
TGME49_286150	1.2724553	0.347615	0.0008183535961301171	0.001632455000688467	P1	0.347615	PAN/Apple domain-containing protein
TGME49_261850	1.2681489	0.34272414	0.007006963173295775	0.011912401562330135	P1	0.34272414	helicase putative
TGME49_288330	1.2663186	0.3406404	0.004566057089461259	0.00801099255870166	P1	0.3406404	histone lysine methyltransferase SET putative
TGME49_319380	1.2625383	0.33632717	0.02135574796826098	0.033095531622005916	P1	0.33632717	hypothetical protein
TGME49_305498	1.2548105	0.32746947	0.000174038395989714	0.0003802194238306064	P1	0.32746947	hypothetical protein
TGME49_292390	1.254644	0.3272781	0.0018073481540897445	0.0034126676748137677	P1	0.3272781	KRUF family protein
TGME49_218830	1.2541491	0.32670885	0.001975808270543266	0.0037100214879965373	P1	0.32670885	hypothetical protein
TGME49_291980	1.2517277	0.32392076	2.318580956961237e-17	1.2985898383617114e-16	P1	0.32392076	HECT-domain (ubiquitin-transferase) domain-containing protein
TGME49_290190	1.2452756	0.31646508	3.25947594902414e-10	1.217043937464982e-09	P1	0.31646508	hypothetical protein
TGME49_248720	1.2437139	0.3146546	0.004401182447718186	0.007747475396712756	P1	0.3146546	hypothetical protein
TGME49_355230	1.2379546	0.30795842	0.0011660724766288568	0.002271891150543789	P1	0.30795842	tRNA-Trp
TGME49_239540	1.237356	0.30726057	0.007460445303969659	0.012624909043744288	P1	0.30726057	LEM3 (ligand-effect modulator 3) family / CDC50 family protein
TGME49_312650	1.2358195	0.305468	0.023498217177475147	0.03608471677835547	P1	0.305468	hypothetical protein
TGME49_300660	1.2341102	0.30347127	5.588467587358043e-21	3.6307844032943105e-20	P1	0.30347127	RNA polymerase B
TGME49_253615	1.2331414	0.30233824	4.6982099055935634e-06	1.2380992468843443e-05	P1	0.30233824	hypothetical protein
TGME49_215070	1.2319038	0.30088958	4.9786349895465334e-06	1.3103630764010603e-05	P1	0.30088958	ferodoxin FD
TGME49_281980	1.2298359	0.2984658	6.911704779135025e-06	1.7901336573006567e-05	P1	0.2984658	phosphatidate cytidylyltransferase
TGME49_268580	1.2295358	0.29811376	0.0027341642433018247	0.005017981572995917	P1	0.29811376	hypothetical protein
TGME49_221660	1.225157	0.29296666	0.013715929307630237	0.022103556369441897	P1	0.29296666	DEAD/DEAH box helicase domain-containing protein
TGME49_292320	1.2240509	0.29166353	0.0029615389848578703	0.005394254532264302	P1	0.29166353	hypothetical protein
TGME49_291940	1.2231705	0.29062554	1.6712542514226462e-17	9.416553307215257e-17	P1	0.29062554	hypothetical protein
TGME49_311760	1.2176335	0.28407994	0.006932654778979682	0.01180032290674373	P1	0.28407994	hypothetical protein
TGME49_219800	1.2137833	0.27951083	0.0004830864597357058	0.0009954008877598856	P1	0.27951083	vacuolar ATP synthase subunit b putative
TGME49_286080	1.2121831	0.27760765	0.00015944010950311817	0.00035022917161595216	P1	0.27760765	elongation factor 2 family protein
TGME49_300631	1.209892	0.27487832	8.983705625574821e-07	2.5470418836389707e-06	P1	0.27487832	ribosomal protein L4
TGME49_304720	1.208874	0.27366388	0.00021420425973362692	0.00046305840228057666	P1	0.27366388	hypothetical protein
TGME49_315970	1.2070665	0.2715052	0.0035416079276486003	0.0063427524505767765	P1	0.2715052	hypothetical protein
TGME49_318260	1.2024038	0.26592147	0.0209603688812847	0.03256047003335122	P1	0.26592147	transcription initiation factor TFIID subunit TAF5
TGME49_214220	1.2023144	0.26581416	3.262501257395542e-22	2.2186059275332325e-21	P1	0.26581416	hypothetical protein
TGME49_294820	1.1996474	0.26261047	0.0005124760891782016	0.0010526199049608685	P1	0.26261047	type I fatty acid synthase putative
TGME49_305100	1.1911979	0.2524131	2.607701946806808e-08	8.464508317728785e-08	P1	0.2524131	hypothetical protein
TGME49_290290	1.1907874	0.2519159	0.0002317787537651561	0.0004990067178945981	P1	0.2519159	ubiquitin-activating enzyme E1 family protein
TGME49_255240	1.1905301	0.25160405	2.249904386239892e-10	8.53286593901308e-10	P1	0.25160405	hypothetical protein
TGME49_210490	1.1886632	0.24934006	2.4933173744929105e-15	1.2564772401531696e-14	P1	0.24934006	hypothetical protein
TGME49_237520	1.1869323	0.24723768	0.02930558543370978	0.044026142755800926	P1	0.24723768	hypothetical protein
TGME49_210482	1.1798913	0.238654	1.1220273722400861e-07	3.4510718084267177e-07	P1	0.238654	hypothetical protein
TGME49_319850	1.1749412	0.23258854	3.8349386716195333e-08	1.22688984926131e-07	P1	0.23258854	splicing factor U2AF family SnRNP auxilary factor large subunit RRM domain-containing protein
TGME49_294700	1.1746147	0.23218757	0.0007121982904823239	0.0014318559298771025	P1	0.23218757	polynucleotide 5'-hydroxyl-kinase
TGME49_320450	1.1711154	0.22788325	7.1072474445653e-07	2.035531092465192e-06	P1	0.22788325	ribosome biogenesis regulatory protein (rrs1) protein
TGME49_261760	1.1689183	0.22517404	0.0019678209125105527	0.0036958451027494167	P1	0.22517404	CDP-alcohol phosphatidyltransferase superfamily protein
TGME49_289530	1.1685159	0.22467738	3.889767444131934e-51	5.898200329109213e-50	P1	0.22467738	ribosomal protein RPL19
TGME49_305810	1.1639796	0.21906583	0.004065366208479344	0.0072013596889296426	P1	0.21906583	hypothetical protein
TGME49_294902	1.1521726	0.20435682	4.2307458584020245e-05	9.986830497502375e-05	P1	0.20435682	hypothetical protein
TGME49_295468	1.1326842	0.17974572	1.7976649459589761e-25	1.3666136933905953e-24	P1	0.17974572	C2 domain-containing protein
TGME49_295600	1.1122152	0.15343592	3.10731740822205e-08	1.0020772367255989e-07	P1	0.15343592	SAG-related sequence SRS10
TGME49_295430	1.1121411	0.15333988	4.5789273231140824e-08	1.453349123300321e-07	P1	0.15333988	hypothetical protein
TGME49_295440	1.1097054	0.1501768	9.396872848671797e-09	3.143207448708198e-08	P1	0.1501768	hypothetical protein
TGME49_304910	1.096232	0.13255323	0.00027373632300643763	0.0005836851764989578	P1	0.13255323	hypothetical protein
TGME49_286410	1.0743998	0.10353097	2.4172224435861156e-27	1.9443676912884125e-26	P1	0.10353097	hypothetical protein
TGME49_291075	1.0595798	0.08349231	3.525154766386026e-18	2.0462857152506097e-17	P1	0.08349231	hypothetical protein
TGME49_295710	1.0379097	0.053680997	1.8492215356237667e-30	1.647523743658052e-29	P1	0.053680997	HECT-domain (ubiquitin-transferase) domain-containing protein
TGME49_311510	1.03481	0.049365826	6.898135078566726e-14	3.2385574693482253e-13	P1	0.049365826	eIF2 kinase IF2K-B
TGME49_292170	1.0177089	0.025324956	6.745569945499943e-16	3.506035923673386e-15	P1	0.025324956	histone lysine methyltransferase SET putative
TGME49_326900	7.046094	2.8168237	0.001151009596544734	0.0022446148816478466	P2	2.8168237	hypothetical protein
TGME49_279350	4.325152	2.1127508	8.930545582510407e-11	3.488778352908552e-10	P2	2.1127508	hypothetical protein
TGME49_249300	4.1255016	2.0445695	2.6901197315434307e-106	1.2483929259679018e-104	P2	2.0445695	hypothetical protein
TGME49_307750	3.9702995	1.9892478	0.026675825603122275	0.04044955530412401	P2	1.9892478	tRNA-His
TGME49_289900	3.9645205	1.9871464	1.188005605043225e-12	5.215122318188711e-12	P2	1.9871464	n-acetyltransferase family protein
TGME49_272520	3.785154	1.920352	1.6524994952503898e-31	1.5056106512281328e-30	P2	1.920352	hypothetical protein
TGME49_215360	3.6834207	1.8810462	1.5183175416515518e-13	6.969407585211416e-13	P2	1.8810462	hypothetical protein
TGME49_239010	3.44042	1.7825847	3.0208726975353347e-40	3.49032705928638e-39	P2	1.7825847	hypothetical protein
TGME49_285850	3.2093885	1.6822984	8.479799322575191e-08	2.633102392590811e-07	P2	1.6822984	peptidyl-prolyl cis-trans isomerase FKBP-type domain-containing protein
TGME49_294980	3.2036428	1.6797132	2.372088111199542e-28	1.9855952613668316e-27	P2	1.6797132	hypothetical protein
TGME49_297400	3.1401227	1.650821	3.034214876100048e-103	1.3487883601863687e-101	P2	1.650821	hypothetical protein
TGME49_250710	3.1293912	1.645882	7.923933315394238e-303	1.6731385195454933e-299	P2	1.645882	microneme protein MIC10
TGME49_224290	3.0508802	1.6092255	7.235398993734006e-23	5.000833052461328e-22	P2	1.6092255	DHHC zinc finger domain-containing protein
TGME49_240090	3.0142374	1.5917931	4.3589586348284106e-153	4.382829122590566e-151	P2	1.5917931	rhoptry kinase family protein ROP34 putative
TGME49_201785	2.960977	1.5660733	0.0	0.0	P2	1.5660733	hypothetical protein
TGME49_276930	2.8984272	1.5352702	3.588120172361379e-53	5.805605934054446e-52	P2	1.5352702	hypothetical protein
TGME49_294990	2.7887642	1.4796259	2.905389298208691e-76	7.620781991512611e-75	P2	1.4796259	hypothetical protein
TGME49_277080	2.7264957	1.447048	0.0	0.0	P2	1.447048	microneme protein MIC5
TGME49_225120	2.7057893	1.4360496	3.3585320822155605e-56	5.8008511178717024e-55	P2	1.4360496	hypothetical protein
TGME49_232380	2.6681147	1.4158207	0.0013126911816216634	0.0025335899725723423	P2	1.4158207	WD domain G-beta repeat-containing protein
TGME49_208830	2.6673262	1.4153943	4.780525672791562e-48	6.763202651992887e-47	P2	1.4153943	hypothetical protein
TGME49_286690	2.662067	1.4125469	3.374886445609763e-06	8.99472733342381e-06	P2	1.4125469	DNA/RNA-binding protein KIN17 domain-containing protein
TGME49_288840	2.6265273	1.3931565	1.1444121269136974e-38	1.2569187027195173e-37	P2	1.3931565	hypothetical protein
TGME49_204050	2.6014388	1.3793098	6.271140662315255e-189	1.203773955316242e-186	P2	1.3793098	subtilisin SUB1
TGME49_275650	2.5967119	1.376686	6.335566979189117e-09	2.1455572857350156e-08	P2	1.376686	hypothetical protein
TGME49_250950	2.588241	1.371972	8.466337847779177e-43	1.0469500653344499e-41	P2	1.371972	KRUF family protein
TGME49_243930	2.5818586	1.36841	1.688343656572474e-107	7.96634107453135e-106	P2	1.36841	hypothetical protein
TGME49_278270	2.537579	1.3434528	1.0819700046254584e-29	9.420947071202702e-29	P2	1.3434528	nucleolar protein structural component of H/ACA snoRNPs putative
TGME49_203070	2.518983	1.3328413	2.28118745700166e-52	3.6080354422913897e-51	P2	1.3328413	hypothetical protein
TGME49_202310	2.5088825	1.327045	2.4612536196504167e-15	1.241059586362234e-14	P2	1.327045	O-sialoglycoprotein endopeptidase
TGME49_307830	2.5010898	1.3225569	2.0195131455111558e-52	3.2061669223660186e-51	P2	1.3225569	hypothetical protein
TGME49_204530	2.4957004	1.3194447	1.3223653973938003e-306	3.7228993821293456e-303	P2	1.3194447	microneme protein MIC11
TGME49_252420	2.4647384	1.3014345	0.018326129242991807	0.028871943216994742	P2	1.3014345	histone arginine methyltransferase PRMT3
TGME49_318620	2.4592867	1.29824	0.0014521236489167268	0.002782358516050516	P2	1.29824	RNA-directed RNA polymerase
TGME49_299790	2.4430397	1.2886772	9.906698756331346e-46	1.319747282270892e-44	P2	1.2886772	hypothetical protein
TGME49_312990	2.4286554	1.2801578	1.5601294429696093e-07	4.72797031766104e-07	P2	1.2801578	DEAD/DEAH box ATP-dependent RNA helicase
TGME49_309570	2.4246552	1.2777796	0.004923204497145318	0.008601858746977524	P2	1.2777796	DEAD/DEAH box helicase domain-containing protein
TGME49_217640	2.4217732	1.2760638	1.59492982749032e-16	8.640652548417731e-16	P2	1.2760638	hypothetical protein
TGME49_299780	2.4213822	1.2758307	2.5743577787165777e-81	7.446241712000074e-80	P2	1.2758307	hypothetical protein
TGME49_218600	2.4090374	1.2684567	7.138788760686204e-06	1.845552796839782e-05	P2	1.2684567	RNA recognition motif-containing protein
TGME49_204540	2.361823	1.239901	4.096248233588441e-95	1.5308368398622998e-93	P2	1.239901	DUF367 domain-containing protein
TGME49_253640	2.349845	1.2325655	4.665081698541681e-33	4.492734324502056e-32	P2	1.2325655	hypothetical protein
TGME49_211460	2.3457518	1.2300503	2.6526621581643174e-09	9.288716661631769e-09	P2	1.2300503	hypothetical protein
TGME49_312410	2.3452597	1.2297477	0.007890468658326053	0.013296667655271717	P2	1.2297477	hypothetical protein
TGME49_244440	2.3449998	1.2295878	1.3109055673808632e-46	1.7829160099998022e-45	P2	1.2295878	nucleoside transporter protein
TGME49_230160	2.3338335	1.2227017	3.1013200573850995e-223	1.4552082891485862e-220	P2	1.2227017	hypothetical protein
TGME49_242730	2.3285089	1.2194064	0.0033873749610910425	0.006089776271046178	P2	1.2194064	guanylate kinase family protein
TGME49_289630	2.2972505	1.1999081	3.0240884210733328e-37	3.2371927508726705e-36	P2	1.1999081	microneme protein MIC16
TGME49_226520	2.25649	1.1740804	4.291192876458539e-09	1.4745083415202937e-08	P2	1.1740804	hypothetical protein
TGME49_222245	2.2451086	1.1667852	1.3455444338715787e-07	4.1012155497940646e-07	P2	1.1667852	hypothetical protein
TGME49_218520	2.244031	1.1660926	1.9811151823976087e-253	1.6732498830530204e-250	P2	1.1660926	microneme protein MIC6
TGME49_278420	2.2377007	1.1620171	8.4431284441376e-18	4.815034627899133e-17	P2	1.1620171	Toxoplasma gondii family A protein
TGME49_249980	2.2228396	1.1524038	8.794807194393964e-67	1.8570235390962856e-65	P2	1.1524038	leucine rich repeat-containing protein
TGME49_222192	2.2101874	1.1441687	0.00172719577472998	0.0032722959877454936	P2	1.1441687	hypothetical protein
TGME49_249970	2.1805212	1.124673	1.997288253346208e-86	6.463255397609989e-85	P2	1.124673	hypothetical protein
TGME49_216720	2.1659763	1.1150174	5.49571041955641e-42	6.602670014733064e-41	P2	1.1150174	hypothetical protein
TGME49_226540	2.152424	1.1059624	2.6601507260052186e-07	7.894459954968403e-07	P2	1.1059624	protein kinase
TGME49_232410	2.1280725	1.0895473	2.843119862901018e-94	1.0486021992166812e-92	P2	1.0895473	PDI family protein
TGME49_244530	2.1205752	1.0844556	1.1473289263885317e-58	2.0884353690253316e-57	P2	1.0844556	hypothetical protein
TGME49_280400	2.1174605	1.082335	4.081866735678728e-09	1.4071610795731647e-08	P2	1.082335	hypothetical protein
TGME49_316710	2.1097076	1.077043	2.101651817806491e-42	2.5875439144597116e-41	P2	1.077043	hypothetical protein
TGME49_319730	2.099707	1.0701879	0.005922034905969706	0.010220168944793653	P2	1.0701879	YOU2 family C2C2 zinc finger protein
TGME49_289600	2.0967164	1.0681317	1.6756916144463166e-118	9.311112747114203e-117	P2	1.0681317	heat shock protein HSP29
TGME49_316250	2.0936708	1.0660347	1.5526873058415471e-83	4.7172651025675206e-82	P2	1.0660347	hypothetical protein
TGME49_230118	2.089823	1.0633807	0.0004357097592024825	0.0009026256134962393	P2	1.0633807	hypothetical protein
TGME49_213740	2.0865598	1.0611262	0.009697952871551197	0.016035416983774746	P2	1.0611262	hypothetical protein
TGME49_222060	2.0842178	1.059506	4.036955803308123e-12	1.7228968526902683e-11	P2	1.059506	hypothetical protein
TGME49_257800	2.0824354	1.0582718	0.0010439106718515873	0.0020499580410273206	P2	1.0582718	polynucleotide adenylyltransferase
TGME49_310390	2.0551808	1.0392653	1.229562649710838e-24	9.06976955411156e-24	P2	1.0392653	hypothetical protein
TGME49_236580	2.0539153	1.0383767	3.044182385504714e-11	1.2355196745782225e-10	P2	1.0383767	Prp31-15.5k-U4 Snrna Complex family protein
TGME49_318700	2.0524104	1.0373192	3.6815143464758135e-10	1.369782826886992e-09	P2	1.0373192	eukaryotic initiation factor-6 putative
TGME49_220380	2.0493472	1.0351644	2.593353226147562e-42	3.179021966334152e-41	P2	1.0351644	hypothetical protein
TGME49_291890	2.0171478	1.0123168	6.951634246251897e-269	7.339187855480441e-266	P2	1.0123168	microneme protein MIC1
TGME49_297650	2.0165117	1.0118618	1.158133988328625e-27	9.41443663659631e-27	P2	1.0118618	Ser/Thr phosphatase family protein
TGME49_320630	2.0161555	1.0116069	1.9452649838563205e-10	7.400769393536253e-10	P2	1.0116069	phosphotransferase enzyme family protein
TGME49_241240	2.0118396	1.0085154	1.0838535167019516e-57	1.9477078302265283e-56	P2	1.0085154	hypothetical protein
TGME49_214940	1.9927179	0.99473745	5.235373594806281e-230	2.7636228363583655e-227	P2	0.99473745	MIC2-associated protein M2AP
TGME49_233450	1.9883596	0.9915787	1.131824469204411e-49	1.6481705977414578e-48	P2	0.9915787	SAG-related sequence SRS29A
TGME49_290920	1.9841049	0.98848826	3.9372465575661584e-11	1.5827693681677187e-10	P2	0.98848826	oxidoreductase 2OG-Fe(II) oxygenase family protein
TGME49_264030	1.9838428	0.98829776	1.616588258161093e-16	8.7523746336080725e-16	P2	0.98829776	aminotransferase putative
TGME49_205680	1.9747162	0.98164535	5.559186581486522e-48	7.812460876411842e-47	P2	0.98164535	hypothetical protein
TGME49_213635	1.9692149	0.9776206	4.117841174546473e-07	1.2030192514776724e-06	P2	0.9776206	hypothetical protein
TGME49_203370	1.9650576	0.9745716	0.0003408274553683275	0.0007164332225089333	P2	0.9745716	hypothetical protein
TGME49_211695	1.961308	0.9718161	0.003519284535534734	0.0063054470061786935	P2	0.9718161	hypothetical protein
TGME49_223668	1.9609023	0.9715177	0.000262456715177372	0.0005610502192832408	P2	0.9715177	LYAR-type C2HC zinc finger protein
TGME49_253510	1.9494731	0.9630843	4.296977058943473e-08	1.3690029513329527e-07	P2	0.9630843	transporter/permease protein
TGME49_223020	1.9468105	0.96111244	0.016330083619981665	0.02594993156243935	P2	0.96111244	coproporphyrinogen III oxidase
TGME49_277265	1.9419813	0.9575293	2.7521136507411623e-05	6.624209716204006e-05	P2	0.9575293	tRNA-Ala
TGME49_202760	1.9293813	0.94813824	9.81209918128003e-05	0.0002208768381798804	P2	0.94813824	hypothetical protein
TGME49_206500	1.9278475	0.94699097	0.008325771204717976	0.013957813337643513	P2	0.94699097	hypothetical protein
TGME49_249910	1.9272883	0.94657236	9.331956233882343e-05	0.00021079888299376914	P2	0.94657236	mitochondria-associated granulocyte macrophage CSF signaling molecule putative
TGME49_203362	1.9210806	0.941918	0.0029937792545078933	0.005448278298550671	P2	0.941918	hypothetical protein
TGME49_202980	1.9174052	0.9391553	2.017286538217001e-05	4.93998321304169e-05	P2	0.9391553	hypothetical protein
TGME49_270520	1.8921229	0.9200058	1.1373786416813588e-41	1.3549083226573705e-40	P2	0.9200058	hypothetical protein
TGME49_310380	1.8836321	0.9135172	4.0964172361185055e-19	2.4642692290781266e-18	P2	0.9135172	brix domain containing protein
TGME49_290840	1.8809019	0.91142464	0.00010878064195464901	0.0002433804773374743	P2	0.91142464	serine protease
TGME49_277560	1.8669823	0.90070826	3.256130871544967e-135	2.5001164855517085e-133	P2	0.90070826	hypothetical protein
TGME49_226380	1.8659747	0.8999294	4.384493014934098e-28	3.6376648334119244e-27	P2	0.8999294	hypothetical protein
TGME49_255320	1.8522543	0.88928217	0.021087200102495294	0.03273341151730844	P2	0.88928217	mRNA turnover 4 (MRT4) family protein
TGME49_285950	1.8517879	0.8889189	0.028240603806131383	0.04261571194328849	P2	0.8889189	hypothetical protein
TGME49_312618	1.8502324	0.88770646	0.023775914049987492	0.036431670911864	P2	0.88770646	hypothetical protein
TGME49_308970	1.8480748	0.88602316	1.4250164396248968e-49	2.0679877747546182e-48	P2	0.88602316	hypothetical protein
TGME49_312480	1.8451796	0.8837612	3.6882191946606447e-06	9.811243879717734e-06	P2	0.8837612	uracil phosphoribosyltransferase FUR1 putative
TGME49_226500	1.8414519	0.8808437	7.383919043466375e-25	5.4946766732261676e-24	P2	0.8808437	hypothetical protein
TGME49_259880	1.8385636	0.8785791	4.009988918699334e-11	1.6097132322877648e-10	P2	0.8785791	hypothetical protein
TGME49_239590	1.8382783	0.8783552	0.006421577019412568	0.010999115697821648	P2	0.8783552	WD domain G-beta repeat-containing protein
TGME49_270610	1.8310655	0.8726834	0.021899168636572656	0.033869323989103216	P2	0.8726834	hypothetical protein
TGME49_216210	1.8263326	0.86894953	5.445134253967927e-05	0.00012662335878032245	P2	0.86894953	hypothetical protein
TGME49_239890	1.8221477	0.8656399	2.472417889015785e-30	2.1957982639986667e-29	P2	0.8656399	SCP family extracellular subfamily protein
TGME49_220280	1.8206902	0.86448544	0.017205194266805158	0.027232959291123758	P2	0.86448544	mucin family glycoprotein
TGME49_209430	1.799779	0.8478198	0.03033001779830431	0.04543585142328453	P2	0.8478198	40S ribosomal protein S4 putative
TGME49_278330	1.7754143	0.82815576	1.120132203278662e-07	3.446497846590739e-07	P2	0.82815576	Toxoplasma gondii family A protein
TGME49_237230	1.7700307	0.8237744	8.21011154997126e-169	1.1006762246199567e-166	P2	0.8237744	hypothetical protein
TGME49_277020	1.7608613	0.81628126	0.00012371626730110126	0.00027526543562305094	P2	0.81628126	hypothetical protein
TGME49_225125	1.7600759	0.8156377	3.947951335266327e-05	9.350644132826527e-05	P2	0.8156377	pre-rRNA processing protein
TGME49_294200	1.7589623	0.81472456	1.4566529561502643e-97	5.7760051021808136e-96	P2	0.81472456	glucose-6-phosphate 1-dehydrogenase
TGME49_314080	1.7575388	0.81355655	8.06503326541078e-12	3.3838684033611256e-11	P2	0.81355655	hypothetical protein
TGME49_273840	1.7555207	0.811899	0.001059558850209735	0.002076823868385106	P2	0.811899	brix domain-containing protein
TGME49_314660	1.7540507	0.81069046	4.389597500721973e-14	2.0816698759740472e-13	P2	0.81069046	TPRX1 protein
TGME49_243240	1.7514373	0.80853933	0.02792145575422915	0.04218687214672977	P2	0.80853933	WD domain G-beta repeat-containing protein
TGME49_277860	1.751334	0.8084542	2.473438521166651e-27	1.9876937916054744e-26	P2	0.8084542	hypothetical protein
TGME49_242830	1.7505758	0.8078295	0.009871793142717352	0.016284602516287258	P2	0.8078295	XRN 5'-3' exonuclease N-terminus protein
TGME49_270020	1.7402675	0.79930913	0.009096756390861977	0.015136171094803048	P2	0.79930913	hypothetical protein
TGME49_247470	1.7313637	0.79190874	9.875855425342495e-22	6.57819202858381e-21	P2	0.79190874	nucleolar protein putative
TGME49_259950	1.7195674	0.78204566	0.0026886790552564563	0.0049409450175578835	P2	0.78204566	carbonate dehydratase eukaryotic-type domain-containing protein
TGME49_233100	1.710947	0.7747951	1.7822760048726996e-14	8.621479459997033e-14	P2	0.7747951	SPFH domain / Band 7 family protein
TGME49_270280	1.7103423	0.7742851	9.914997083792308e-19	5.884895668988745e-18	P2	0.7742851	hypothetical protein
TGME49_206590	1.7076411	0.77200484	3.932191012500706e-09	1.3605606428341239e-08	P2	0.77200484	calcium-dependent protein kinase CDPK2A
TGME49_245435	1.7053912	0.7701027	0.0005182020742977673	0.0010636050351200347	P2	0.7701027	hypothetical protein
TGME49_308980	1.7033268	0.76835525	8.936026294782868e-43	1.1034163462826914e-41	P2	0.76835525	hypothetical protein
TGME49_315320	1.6997676	0.76533747	7.419728944587891e-53	1.1913884157032191e-51	P2	0.76533747	SAG-related sequence SRS52A
TGME49_220025	1.6962284	0.7623304	1.0366490087950403e-51	1.609473810346123e-50	P2	0.7623304	hypothetical protein
TGME49_200360	1.690787	0.7576949	3.6037849556876943e-115	1.8788622059097695e-113	P2	0.7576949	hypothetical protein
TGME49_220100	1.6836041	0.75155294	1.6027864554706457e-09	5.671191622498984e-09	P2	0.75155294	phosphoribosylpyrophosphate synthetase
TGME49_236870	1.6730354	0.742468	7.174830907017467e-18	4.1028179986912347e-17	P2	0.742468	hypothetical protein
TGME49_203310	1.6701046	0.7399385	9.360426036930895e-303	1.5811631661583668e-299	P2	0.7399385	dense granule protein GRA7
TGME49_266640	1.6513926	0.7236831	4.785020340346009e-09	1.6388597645807945e-08	P2	0.7236831	Acetyl-coenzyme A synthetase 2 putative
TGME49_233400	1.6493883	0.7219311	0.014937841999276313	0.023890364235161474	P2	0.7219311	TAF9 RNA polymerase II TATA box binding protein (TBP)-associated factor isoform 2 family protein
TGME49_256050	1.6420966	0.71553904	2.3520606824239172e-15	1.1881282609899764e-14	P2	0.71553904	signal recognition particle 14kd protein
TGME49_228145	1.6403688	0.71402025	3.0132671279760455e-09	1.0486219267773251e-08	P2	0.71402025	hypothetical protein
TGME49_220890	1.6340163	0.70842236	6.843713826702399e-08	2.1392304581912827e-07	P2	0.70842236	hypothetical protein
TGME49_272770	1.6298519	0.7047409	0.011267150550611924	0.018424463417322037	P2	0.7047409	hypothetical protein
TGME49_220170	1.6287993	0.70380884	4.590743720524903e-05	0.00010791378086154557	P2	0.70380884	hypothetical protein
TGME49_323010	1.6283039	0.70337	2.6997621750678462e-11	1.0983714513787587e-10	P2	0.70337	hypothetical protein
TGME49_227790	1.6226017	0.69830894	0.022618502203223527	0.03486692272466251	P2	0.69830894	glycosyltransferase group 1 family protein
TGME49_249390	1.620309	0.696269	4.9840021159327197e-23	3.4674532019083813e-22	P2	0.696269	glutamate/leucine/phenylalanine/valine dehydrogenase family protein
TGME49_315802	1.6196824	0.69571096	0.0035337130969386827	0.006329955634516249	P2	0.69571096	hypothetical protein
TGME49_243580	1.6176544	0.69390345	1.5267315784677812e-07	4.6284188484346306e-07	P2	0.69390345	Hit family protein involved in cell-cycle regulation putative
TGME49_224620	1.6120409	0.6888883	2.831626907027483e-09	9.878529887135119e-09	P2	0.6888883	hypothetical protein
TGME49_214210	1.6050928	0.68265665	2.475508294746325e-24	1.805539124130178e-23	P2	0.68265665	rRNA pseudouridine synthase
TGME49_289660	1.6042918	0.68193656	3.265791785128927e-17	1.8182516425312404e-16	P2	0.68193656	hypothetical protein
TGME49_249990	1.6014082	0.67934114	4.860590386072692e-64	9.892179855607217e-63	P2	0.67934114	hypothetical protein
TGME49_308020	1.6013924	0.67932683	5.443851981936991e-64	1.1052589865249958e-62	P2	0.67932683	SAG-related sequence SRS57
TGME49_289650	1.5976274	0.675931	7.762884396180177e-21	5.008809901462015e-20	P2	0.675931	PEP-carboxykinase I
TGME49_314500	1.5956049	0.6741035	6.31181091331545e-14	2.969891641997899e-13	P2	0.6741035	subtilisin SUB2
TGME49_236040	1.5952917	0.67382026	7.951810008109246e-26	6.116665512612996e-25	P2	0.67382026	fructose-1%2C6-bisphosphate aldolase
TGME49_294800	1.592862	0.6716213	1.6925966630058299e-149	1.6431806224996826e-147	P2	0.6716213	elongation factor 1-alpha (EF-1-ALPHA) putative
TGME49_231960	1.591116	0.67003894	1.0378147000368776e-14	5.078437402382079e-14	P2	0.67003894	omega secalin putative
TGME49_244000	1.590708	0.66966903	0.022262326035514642	0.03438061907038886	P2	0.66966903	DEAD/DEAH box helicase domain-containing protein
TGME49_203610	1.5898999	0.6689359	0.008772426515721955	0.014633994539164058	P2	0.6689359	3'-5' exoribonuclease csl4 putative
TGME49_268810	1.5849041	0.6643956	0.020804881633760784	0.032336774066754434	P2	0.6643956	ck2 beta subunit
TGME49_287430	1.5787826	0.65881246	4.439568598468531e-06	1.1728682008966285e-05	P2	0.65881246	hypothetical protein
TGME49_226020	1.5775841	0.657717	6.970250321730122e-43	8.644748049534892e-42	P2	0.657717	transporter major facilitator family protein
TGME49_250730	1.5755188	0.65582705	2.7730469354101783e-06	7.480407031770797e-06	P2	0.65582705	60S ribosomal protein L7-B putative
TGME49_231020	1.5692056	0.6500344	0.0002796627052005716	0.0005954200171726816	P2	0.6500344	hypothetical protein
TGME49_249650	1.5639263	0.6451726	7.291796381890985e-11	2.8765302308010865e-10	P2	0.6451726	apolipoprotein A-I binding protein putative
TGME49_280375	1.5629603	0.6442811	1.2264254124446333e-18	7.2436286947604e-18	P2	0.6442811	hypothetical protein
TGME49_266800	1.5588654	0.6404964	0.005838713803175528	0.010088743204095849	P2	0.6404964	integral membrane protein putative
TGME49_293310	1.5561084	0.63794255	7.821273576424813e-05	0.0001786813000445874	P2	0.63794255	ribosomal protein L20 putative
TGME49_253430	1.5541863	0.6361595	1.5874514176077956e-51	2.44218846504835e-50	P2	0.6361595	asparagine synthetase putative
TGME49_232350	1.5510092	0.6332072	7.944524883835328e-30	6.967752561669073e-29	P2	0.6332072	lactate dehydrogenase LDH1
TGME49_278710	1.5509921	0.63319135	0.01617278238701815	0.025719322169225248	P2	0.63319135	hypothetical protein
TGME49_227280	1.5492569	0.6315764	2.332280879694121e-180	3.7881623672877973e-178	P2	0.6315764	dense granule protein GRA3
TGME49_251760	1.5428809	0.6256267	4.092925531276736e-12	1.7459014665233997e-11	P2	0.6256267	subunit of proteaseome activator complex putative
TGME49_286928	1.541152	0.62400913	1.852267133648336e-07	5.583243472802944e-07	P2	0.62400913	hypothetical protein
TGME49_316310	1.53872	0.62173074	2.4600154959896584e-78	6.638112101958036e-77	P2	0.62173074	superoxide dismutase
TGME49_266080	1.5328602	0.6162261	1.4899838438660507e-39	1.6960112594734048e-38	P2	0.6162261	hypothetical protein
TGME49_261690	1.5318899	0.61531264	0.020140800540678412	0.03142024406475247	P2	0.61531264	hypothetical protein
TGME49_296340	1.5291251	0.6127064	0.00010715895908350034	0.00024000651509393898	P2	0.6127064	hypothetical protein
TGME49_211710	1.5253052	0.60909784	2.5521336162524475e-19	1.5474027654607446e-18	P2	0.60909784	TB2/DP1 HVA22 family protein
TGME49_313130	1.5215544	0.6055459	0.010522037930063434	0.017282989567739354	P2	0.6055459	hypothetical protein
TGME49_228150	1.5181094	0.6022758	2.835358622056925e-06	7.6265729050613974e-06	P2	0.6022758	hypothetical protein
TGME49_310790	1.518049	0.6022184	1.1445388718641039e-61	2.2070263268868086e-60	P2	0.6022184	hypothetical protein
TGME49_235140	1.5172774	0.6014848	6.601277229086722e-44	8.37152965118115e-43	P2	0.6014848	hypothetical protein
TGME49_207720	1.5145904	0.5989277	0.014246118831346093	0.02287504175846941	P2	0.5989277	hypothetical protein
TGME49_277880	1.5139213	0.5982902	5.934219969530255e-05	0.0001374668729090854	P2	0.5982902	hypothetical protein
TGME49_220510	1.512116	0.59656876	1.5340340706033667e-05	3.811842236044729e-05	P2	0.59656876	hypothetical protein
TGME49_254470	1.5119057	0.5963682	2.2050581635732507e-40	2.551222088978038e-39	P2	0.5963682	hypothetical protein
TGME49_289690	1.5092735	0.5938543	2.5127403077699702e-68	5.570237438169336e-67	P2	0.5938543	glyceraldehyde-3-phosphate dehydrogenase GAPDH1
TGME49_306520	1.5092322	0.59381473	9.887503610709382e-06	2.5153570932545616e-05	P2	0.59381473	tRNA pseudouridine synthase B putative
TGME49_261050	1.5063722	0.5910783	0.026466605896113396	0.04014672295233005	P2	0.5910783	RNB family domain-containing protein
TGME49_224600	1.5059685	0.59069157	7.565433693924452e-11	2.977523437972317e-10	P2	0.59069157	GTP binding protein
TGME49_220240	1.5056095	0.59034765	1.6415884428549701e-57	2.9312591941549844e-56	P2	0.59034765	hypothetical protein
TGME49_305870	1.5044703	0.5892557	0.02366373309897415	0.036305883697354345	P2	0.5892557	DAD family protein
TGME49_290660	1.4959279	0.5810407	1.223035860457163e-33	1.203934834198275e-32	P2	0.5810407	RNA recognition motif-containing protein
TGME49_215740	1.4947091	0.5798648	0.03135808143841192	0.04682644197822262	P2	0.5798648	notchless putative
TGME49_216730	1.4929916	0.578206	2.3276380672866013e-19	1.415351412260809e-18	P2	0.578206	MCM2/3/5 family protein
TGME49_202900	1.4912225	0.5764955	2.4995226630264453e-12	1.0776400414457048e-11	P2	0.5764955	zinc finger (CCCH type) motif-containing protein
TGME49_217530	1.4896061	0.5749309	5.361701905174673e-10	1.9663453882373115e-09	P2	0.5749309	hypothetical protein
TGME49_277240	1.4857044	0.5711471	2.804535828430358e-90	9.95256706173227e-89	P2	0.5711471	NTPase I
TGME49_323100	1.4853916	0.57084334	1.7856685881711676e-54	2.9572072344497417e-53	P2	0.57084334	hypothetical protein
TGME49_270880	1.4849218	0.570387	1.6179766306340474e-10	6.186251979327825e-10	P2	0.570387	RNA recognition motif-containing protein
TGME49_277230	1.4775463	0.56320333	2.9528117506766365e-92	1.0796297855504272e-90	P2	0.56320333	hypothetical protein
TGME49_202300	1.4746637	0.56038606	0.0014053459898634225	0.002698238742983966	P2	0.56038606	inosine triphosphate pyrophosphatase putative
TGME49_257380	1.4743346	0.56006396	2.560453192319998e-34	2.5531980711138966e-33	P2	0.56006396	hypothetical protein
TGME49_226920	1.4724524	0.558221	0.007345575846076867	0.012447980256012282	P2	0.558221	hypothetical protein
TGME49_204440	1.4636464	0.5495671	0.0014538815777351399	0.0027844634479707465	P2	0.5495671	cyclic nucleotide-binding domain-containing protein
TGME49_305890	1.4590383	0.5450177	0.005245957899122553	0.009114865339639804	P2	0.5450177	hypothetical protein
TGME49_202830	1.4486114	0.5346706	5.879132224986978e-45	7.662831909296298e-44	P2	0.5346706	Elicitor-responsive protein putative
TGME49_271145	1.4471878	0.5332521	0.006594718900118156	0.011265978121035183	P2	0.5332521	hypothetical protein
TGME49_212960	1.4464028	0.5324694	0.0038691329798248015	0.006886975162824083	P2	0.5324694	hypothetical protein
TGME49_310410	1.4430894	0.5291606	3.5432691155126376e-08	1.135728688790123e-07	P2	0.5291606	WD domain G-beta repeat-containing protein
TGME49_289540	1.4419061	0.5279772	3.0698781579683883e-05	7.353429076063813e-05	P2	0.5279772	hypothetical protein
TGME49_213650	1.4391586	0.5252255	0.0006574991269980098	0.0013307542838785504	P2	0.5252255	ATP-binding domain 1 family protein
TGME49_240660	1.4319439	0.517975	0.02249935303033836	0.03469591668691579	P2	0.517975	hypothetical protein
TGME49_227570	1.4306588	0.51667964	5.775529365658613e-05	0.00013390096355298556	P2	0.51667964	transmembrane amino acid transporter protein
TGME49_220870	1.4223689	0.50829566	0.009677066763035452	0.016004015249774316	P2	0.50829566	hypothetical protein
TGME49_211420	1.4222552	0.5081803	3.142950259303938e-12	1.3495352257285745e-11	P2	0.5081803	RNA recognition motif-containing protein
TGME49_235170	1.4212382	0.5071484	0.0002451940634267263	0.0005260119531882475	P2	0.5071484	ATPase AAA family protein
TGME49_279100	1.4146374	0.5004324	4.67146651748368e-62	9.154340187161754e-61	P2	0.5004324	hypothetical protein
TGME49_269950	1.4120506	0.4977918	5.856003396145608e-14	2.7646620840606935e-13	P2	0.4977918	hypothetical protein
TGME49_264610	1.411993	0.49773297	1.7517367721729054e-12	7.614600503228182e-12	P2	0.49773297	RNA recognition motif-containing protein
TGME49_228340	1.4102638	0.49596503	1.3517938612285487e-06	3.7606228431937825e-06	P2	0.49596503	hypothetical protein
TGME49_323110	1.396889	0.48221734	9.21858672302314e-24	6.576029008670055e-23	P2	0.48221734	hypothetical protein
TGME49_253690	1.3916655	0.47681245	9.35987624133912e-112	4.677722765346166e-110	P2	0.47681245	hypothetical protein
TGME49_228130	1.3911264	0.4762535	0.00013197910205055413	0.0002922641572939119	P2	0.4762535	hypothetical protein
TGME49_219210	1.3905928	0.47570005	0.018680994704197897	0.029365285924372875	P2	0.47570005	ankyrin repeat-containing protein
TGME49_245610	1.3820528	0.46681273	1.1285608922327125e-05	2.843623298268941e-05	P2	0.46681273	hypothetical protein
TGME49_222170	1.3802016	0.464879	9.869926629292696e-06	2.5116420702321817e-05	P2	0.464879	dense-granule antigen DG32
TGME49_308030	1.3798544	0.46451607	8.695304331887506e-12	3.637471044433971e-11	P2	0.46451607	hypothetical protein
TGME49_216780	1.3746669	0.4590821	4.237811158213622e-07	1.2359306989734893e-06	P2	0.4590821	hypothetical protein
TGME49_254730	1.3739607	0.45834076	1.3408996554601658e-131	9.359701231418644e-130	P2	0.45834076	POPLD (NUC188) domain-containing protein
TGME49_288650	1.3671527	0.45117438	5.330162277243634e-240	3.4629654302769026e-237	P2	0.45117438	dense granule protein GRA12
TGME49_219630	1.3643212	0.44818336	0.001143589365614891	0.002230659533945351	P2	0.44818336	flavodoxin domain-containing protein
TGME49_203950	1.36172	0.44543004	0.028884548436899783	0.043501942956144	P2	0.44543004	Myb family DNA-binding domain-containing protein
TGME49_254750	1.3610326	0.44470164	4.168440179501895e-59	7.687040558094542e-58	P2	0.44470164	c3orf15 protein
TGME49_251630	1.3586711	0.44219625	1.0362578803296637e-10	4.03514709878485e-10	P2	0.44219625	slc30a2 protein
TGME49_209620	1.3547176	0.4379922	2.9473756057687255e-05	7.068010893334087e-05	P2	0.4379922	eukaryotic aspartyl protease superfamily protein
TGME49_307270	1.3518013	0.43488306	0.025168487196856878	0.038398309766013945	P2	0.43488306	hypothetical protein
TGME49_320080	1.3428982	0.42534998	4.817876796505661e-06	1.2688427634327039e-05	P2	0.42534998	hypothetical protein
TGME49_203110	1.3360503	0.4179743	0.00037781428266047735	0.0007896608342861648	P2	0.4179743	citrate synthase putative
TGME49_203720	1.3274708	0.40868008	2.202763594251901e-16	1.1804912003205303e-15	P2	0.40868008	vitamin k epoxide reductase family protein
TGME49_286450	1.3233835	0.40423113	3.3481745350588593e-188	6.2841515829126945e-186	P2	0.40423113	dense granule protein GRA5
TGME49_214440	1.322854	0.4036539	1.222936446197387e-28	1.0349620465514157e-27	P2	0.4036539	4'-phosphopantetheinyl transferase superfamily protein
TGME49_278830	1.3221115	0.40284383	0.003121461240004396	0.005656267245886533	P2	0.40284383	glucose-6-phosphate 1-dehydrogenase
TGME49_276890	1.3143433	0.3943422	0.013475564017148582	0.021732788560022327	P2	0.3943422	hypothetical protein
TGME49_268370	1.312389	0.39219543	0.0012425499317268677	0.002409776515124024	P2	0.39219543	non-specific serine/threonine protein kinase
TGME49_271850	1.3123697	0.39217418	1.644680665310123e-58	2.974512398117623e-57	P2	0.39217418	hypothetical protein
TGME49_271110	1.3116993	0.391437	1.7357811583451923e-44	2.2314166915347783e-43	P2	0.391437	hypothetical protein
TGME49_239740	1.3012738	0.37992457	1.6318043946976241e-99	6.65807725488702e-98	P2	0.37992457	dense granule protein GRA14
TGME49_217540	1.3002232	0.37875932	0.0008951607359071591	0.001776857244529228	P2	0.37875932	RNA recognition motif-containing protein
TGME49_224460	1.2995857	0.3780518	2.812672236572995e-32	2.651320280144589e-31	P2	0.3780518	aminopeptidase n putative
TGME49_295320	1.2976921	0.37594804	0.0006579682685506564	0.001331384761901975	P2	0.37594804	embryo sac development arrest EDA7 putative
TGME49_290850	1.2890218	0.36627668	0.007767408060858009	0.01311021752238344	P2	0.36627668	WD-40 repeat protein
TGME49_250870	1.2863867	0.36332443	0.0010094435800973326	0.0019859679658751623	P2	0.36332443	DHHC zinc finger domain-containing protein
TGME49_201900	1.2832679	0.35982233	1.1978777403018845e-41	1.4229641905189476e-40	P2	0.35982233	hypothetical protein
TGME49_277270	1.2785629	0.35452315	7.319098361411056e-80	2.033457393436769e-78	P2	0.35452315	NTPase II
TGME49_202340	1.2627026	0.33651486	4.853227029343367e-09	1.6608733991018673e-08	P2	0.33651486	proline dehydrogenase
TGME49_293740	1.2565564	0.32947543	1.3878308581821095e-27	1.1270787911736631e-26	P2	0.32947543	hypothetical protein
TGME49_254380	1.2482363	0.31989107	0.000670504147812543	0.001355451898617697	P2	0.31989107	ribosomal protein L11 putative
TGME49_306260	1.2462609	0.3176061	0.0003643327240067884	0.0007629938474984714	P2	0.3176061	hypothetical protein
TGME49_355180	1.2339283	0.3032586	0.008412148439778165	0.014091433106379685	P2	0.3032586	tRNA-Met
TGME49_224230	1.2339009	0.30322653	2.3865547108825885e-07	7.109996856477721e-07	P2	0.30322653	AP2 domain transcription factor AP2X-3
TGME49_285880	1.2323018	0.30135566	0.008052457185673972	0.013539927013777098	P2	0.30135566	hypothetical protein
TGME49_270830	1.2266455	0.29471833	0.00042648527095033627	0.0008843836480349963	P2	0.29471833	small nuclear ribonucleoprotein
TGME49_227620	1.2207271	0.28774068	4.963042961124103e-227	2.4657565205678923e-224	P2	0.28774068	dense granule protein GRA2
TGME49_270250	1.2097973	0.2747653	3.030906576428018e-180	4.8300069706624606e-178	P2	0.2747653	dense granule protein GRA1
TGME49_235200	1.2089778	0.27378777	4.802147834958276e-39	5.343733941246061e-38	P2	0.27378777	PAN domain-containing protein
TGME49_250940	1.2057639	0.2699475	1.8503292303426783e-05	4.549601362292361e-05	P2	0.2699475	hypothetical protein
TGME49_204560	1.1857427	0.24579103	1.678774771758354e-08	5.523541769486193e-08	P2	0.24579103	type I fatty acid synthase putative
TGME49_233480	1.1531545	0.20558581	6.152952503285643e-68	1.3463170166515684e-66	P2	0.20558581	SAG-related sequence SRS29C
TGME49_282030	1.1489233	0.20028245	3.072684338862993e-05	7.358064056148805e-05	P2	0.20028245	hypothetical protein
TGME49_263560	1.1171807	0.15986256	2.690094443439596e-49	3.883852593041167e-48	P2	0.15986256	hypothetical protein
TGME49_236540	1.091104	0.12578866	0.0004328166472037129	0.0008972924404228176	P2	0.12578866	RNA recognition motif-containing protein
TGME49_226910	1.0722572	0.10065095	2.9140880962714696e-37	3.123399500140715e-36	P2	0.10065095	Amylo-alpha-1%2C6-glucosidase
TGME49_301250	1.0536311	0.07536979	1.2719207066140771e-09	4.530848708588147e-09	P2	0.07536979	hypothetical protein
TGME49_243760	1.0338892	0.04808155	9.614394739177774e-13	4.242590280412512e-12	P2	0.04808155	hypothetical protein
TGME49_324300	21.560282	4.430304	0.008014745162543283	0.013481883617375137	P3	4.430304	transitional endoplasmic reticulum ATPase putative
TGME49_264250	21.097904	4.399028	0.0016229984789718182	0.003087352512026121	P3	4.399028	hypothetical protein
TGME49_264100	7.017984	2.8110566	0.018238834139159405	0.028745137738260932	P3	2.8110566	hypothetical protein
TGME49_326800	6.100207	2.608858	0.002379016616601017	0.00440929873684709	P3	2.608858	S-Adenosyl homocysteine hydrolase
TGME49_234670	5.9950585	2.5837739	1.3532045934188048e-12	5.927990661833623e-12	P3	2.5837739	actin-like family protein
TGME49_206605	5.9799514	2.5801337	9.339438353265723e-22	6.225800815444539e-21	P3	2.5801337	hypothetical protein
TGME49_285480	5.430692	2.4411361	2.9762264763758064e-06	7.972473460028564e-06	P3	2.4411361	hypothetical protein
TGME49_275370	5.3951216	2.4316554	5.9416105181184964e-05	0.0001376003357171067	P3	2.4316554	SAG-related sequence SRS47C
TGME49_283698	5.1410933	2.362075	0.0029046929209890593	0.005299856645209245	P3	2.362075	hypothetical protein
TGME49_239320	4.901847	2.2933254	1.7175946703957917e-17	9.66475988418578e-17	P3	2.2933254	BolA family protein
TGME49_266760	4.8427343	2.275822	5.507076527242351e-27	4.3673960891163283e-26	P3	2.275822	isocitrate dehydrogenase
TGME49_272290	4.7564797	2.2498941	7.525742565759946e-07	2.1495577176330237e-06	P3	2.2498941	pyruvate dehydrogenase complex subunit PD-HE1Beta
TGME49_245670	4.5686774	2.1917765	3.7753942668726626e-39	4.229042437401394e-38	P3	2.1917765	pyruvate dehydrogenase complex subunit PDH-E1Alpha
TGME49_233140	4.5481944	2.185294	2.2624166271418305e-30	2.0114074560884104e-29	P3	2.185294	deoxyuridine 5'-triphosphate nucleotidohydrolase putative
TGME49_260990	4.544314	2.1840625	0.01862978966035655	0.029301155208821497	P3	2.1840625	hypothetical protein
TGME49_264080	4.409031	2.1404617	3.1107843879530024e-81	8.967127966092512e-80	P3	2.1404617	acyl carrier protein ACP
TGME49_272383	4.34151	2.118197	2.990537184425513e-07	8.843864516686935e-07	P3	2.118197	hypothetical protein
TGME49_222020	4.338103	2.1170642	1.2403018489487853e-19	7.618610484524684e-19	P3	2.1170642	phosphoglycerate kinase PGKII
TGME49_261070	4.326469	2.11319	2.9422906755437323e-27	2.3599797764142797e-26	P3	2.11319	apicoplast triosephosphate translocator APT1
TGME49_215390	4.258592	2.0903766	0.0001575277514563376	0.00034620853208436835	P3	2.0903766	TIM10 family protein putative
TGME49_225990	4.246178	2.086165	1.3206714662960672e-07	4.028310294090496e-07	P3	2.086165	acyl transferase domain-containing protein
TGME49_289890	4.239688	2.0839581	2.6477099456094007e-10	9.983284910989732e-10	P3	2.0839581	hypothetical protein
TGME49_273110	4.1825795	2.064393	0.011227140112479831	0.01836614863257886	P3	2.064393	SAG-related sequence SRS30D
TGME49_255690	4.1821675	2.064251	1.5041170635202395e-06	4.158354408671667e-06	P3	2.064251	2-C-methyl-D-erythritol 2%2C4-cyclodiphosphate synthase domain-containing protein
TGME49_238110	4.1783714	2.0629408	1.8057707772201039e-47	2.5084769711185852e-46	P3	2.0629408	replication factor a protein 3 protein
TGME49_311280	4.1743526	2.0615525	0.0008254317049601059	0.001645797020796283	P3	2.0615525	hypothetical protein
TGME49_289070	4.053656	2.0192237	1.5824983597486678e-25	1.2062979374040838e-24	P3	2.0192237	E1-E2 ATPase subfamily protein
TGME49_209930	4.050076	2.0179489	3.632500408877613e-10	1.3527380270449876e-09	P3	2.0179489	hypothetical protein
TGME49_216850	3.9013648	1.9639789	0.000981351825277934	0.0019361124775280148	P3	1.9639789	hypothetical protein
TGME49_261075	3.8341303	1.9388994	3.187952111313144e-25	2.3997721508155804e-24	P3	1.9388994	hypothetical protein
TGME49_206610	3.827145	1.9362686	1.785108991021213e-16	9.646212756343675e-16	P3	1.9362686	pyruvate dehydrogenase complex subunit PDH-E2
TGME49_321550	3.7931468	1.9233953	4.498989509846771e-06	1.187452043755182e-05	P3	1.9233953	hypothetical protein
TGME49_262910	3.7799907	1.9183826	5.776495538336975e-08	1.8211377871143743e-07	P3	1.9183826	NADH-cytochrome b5 reductase 1 putative
TGME49_262840	3.7526937	1.9079266	0.008292616292631484	0.013910513844600896	P3	1.9079266	hypothetical protein
TGME49_314460	3.7504747	1.9070733	2.588049665004631e-06	7.005983163663176e-06	P3	1.9070733	hypothetical protein
TGME49_290900	3.7180243	1.8945361	5.7684577007358094e-24	4.1499483594901745e-23	P3	1.8945361	hydrolase NUDIX family protein
TGME49_297245	3.7030792	1.8887254	1.8845716555654214e-65	3.930146222939642e-64	P3	1.8887254	transporter major facilitator family protein
TGME49_232370	3.6529434	1.8690593	7.653626970229582e-05	0.0001749933226598783	P3	1.8690593	CW-type Zinc Finger protein
TGME49_232060	3.637444	1.862925	6.350717484408057e-10	2.3159827233726447e-09	P3	1.862925	hypothetical protein
TGME49_248850	3.6058857	1.8503537	0.00014362514464851103	0.0003168907972051526	P3	1.8503537	methionine aminopeptidase
TGME49_260420	3.584348	1.8417107	3.5732578298628716e-14	1.7041070373247778e-13	P3	1.8417107	HEC/Ndc80p family protein
TGME49_270090	3.559424	1.8316438	2.0863965534158648e-07	6.248831663173899e-07	P3	1.8316438	hypothetical protein
TGME49_222270	3.5095494	1.8112859	5.658363060768673e-26	4.360450220004764e-25	P3	1.8112859	hypothetical protein
TGME49_319580	3.4859023	1.8015321	2.6157414439354173e-08	8.487342387813497e-08	P3	1.8015321	hypothetical protein
TGME49_217750	3.451976	1.7874224	2.3468070279541384e-35	2.408400019210286e-34	P3	1.7874224	hypothetical protein
TGME49_271760	3.4434652	1.7838612	0.0010805681713429102	0.002115058812320329	P3	1.7838612	seryl-tRNA synthetase (SerRS2)
TGME49_212735	3.4393296	1.7821274	0.0008307399050537513	0.0016559899075015302	P3	1.7821274	hypothetical protein
TGME49_315690	3.4310584	1.7786536	7.419528769389107e-15	3.656087513784154e-14	P3	1.7786536	DnaJ domain-containing protein
TGME49_283710	3.424119	1.7757329	9.597076693527867e-13	4.237162036253861e-12	P3	1.7757329	longevity-assurance protein (LAG1) domain-containing protein
TGME49_267520	3.4145398	1.7716912	0.0012544142527467959	0.0024299960501604216	P3	1.7716912	anaphase promoting complex subunit 11 putative
TGME49_257030	3.4140375	1.7714789	0.00877067764097412	0.0146339674744503	P3	1.7714789	hypothetical protein
TGME49_273885	3.3830924	1.7583426	3.876997453161948e-07	1.1365887014719128e-06	P3	1.7583426	hypothetical protein
TGME49_251930	3.3800294	1.7570359	6.195063448199283e-22	4.1526591971024714e-21	P3	1.7570359	enoyl-acyl carrier reductase ENR
TGME49_265380	3.3559504	1.7467214	3.4625398495113147e-06	9.222520204658645e-06	P3	1.7467214	tetratricopeptide repeat (TPR)-/ U-box domain-containing protein
TGME49_257170	3.3452356	1.7421079	0.00019721706934812804	0.00042819932331986875	P3	1.7421079	hypothetical protein
TGME49_244680	3.308518	1.7261851	5.633728401334652e-11	2.2360183307176914e-10	P3	1.7261851	hypothetical protein
TGME49_231998	3.2999506	1.7224444	0.011121375092004912	0.018214297852835657	P3	1.7224444	hypothetical protein
TGME49_252310	3.2785487	1.7130573	1.0505399220315873e-27	8.564536854709253e-27	P3	1.7130573	hypothetical protein
TGME49_260270	3.2668533	1.7079017	0.00047386792429066104	0.000977598556072038	P3	1.7079017	HEAT repeat-containing protein
TGME49_320110	3.2658823	1.7074728	1.5329446344517132e-31	1.4012175738722045e-30	P3	1.7074728	proliferating cell nuclear antigen PCNA2
TGME49_228990	3.237262	1.6947742	8.661469014050328e-10	3.1222691972970153e-09	P3	1.6947742	zinc finger (CCCH type) motif-containing protein
TGME49_312230	3.2284527	1.6908429	8.850038646907551e-15	4.340733241102275e-14	P3	1.6908429	DNA topoisomerase 2 putative
TGME49_286140	3.205375	1.6804931	3.0128457842017713e-09	1.0489074811775829e-08	P3	1.6804931	hypothetical protein
TGME49_240410	3.2043552	1.6800342	3.064897568940608e-25	2.3091993637174285e-24	P3	1.6800342	protein kinase (incomplete catalytic triad)
TGME49_319860	3.2018487	1.6789051	1.335913247595804e-31	1.2264264444776262e-30	P3	1.6789051	DNA polymerase family B protein
TGME49_276830	3.1796694	1.6688768	0.009459307740529008	0.015677651722234693	P3	1.6688768	hypothetical protein
TGME49_289000	3.1754992	1.6669834	0.000935703265503192	0.0018508079111100608	P3	1.6669834	hypothetical protein
TGME49_227970	3.1726744	1.6656995	9.468024669134282e-55	1.577257127327577e-53	P3	1.6656995	histone family DNA-binding protein
TGME49_254820	3.1711001	1.6649834	1.887895042475363e-27	1.5243940276048676e-26	P3	1.6649834	hypothetical protein
TGME49_257980	3.166733	1.6629952	0.00031078457811234466	0.0006577014649804217	P3	1.6629952	ribosome recycling factor protein
TGME49_208560	3.1588802	1.6594132	2.6307099034752525e-22	1.7961985323162478e-21	P3	1.6594132	carrier superfamily protein
TGME49_254580	3.1390002	1.650305	2.823520954520252e-17	1.5761703887559844e-16	P3	1.650305	UDP-galactose transporter family protein
TGME49_249180	3.1366465	1.649223	1.8220716929446932e-28	1.5282241825830068e-27	P3	1.649223	bifunctional dihydrofolate reductase-thymidylate synthase
TGME49_255715	3.1309793	1.646614	0.0006305083624855422	0.001280421646923032	P3	1.646614	hypothetical protein
TGME49_257770	3.124893	1.6438068	8.711676956020443e-05	0.00019742104526575973	P3	1.6438068	histone lysine methyltransferase SET2
TGME49_259550	3.1218596	1.6424056	4.004669373530267e-28	3.3290784969327396e-27	P3	1.6424056	dihydropteroate synthase
TGME49_275690	3.1135838	1.638576	1.438190778670565e-21	9.541994749922697e-21	P3	1.638576	ClpB putative
TGME49_244728	3.1096892	1.6367704	0.02798316384976639	0.04227254549725039	P3	1.6367704	IQ calmodulin-binding motif domain-containing protein
TGME49_224910	3.1055484	1.634848	9.729518536361682e-25	7.202060785110498e-24	P3	1.634848	divalent cation tolerance protein CutA1 family protein
TGME49_281510	3.104615	1.6344144	4.4676258071374624e-33	4.3074848820871017e-32	P3	1.6344144	ribonuclease H1 large subunit putative
TGME49_311640	3.0937984	1.6293792	1.9267792886543684e-05	4.727942438110051e-05	P3	1.6293792	hypothetical protein
TGME49_257740	3.086511	1.6259769	1.209121615881894e-07	3.708148572163572e-07	P3	1.6259769	UMP-CMP kinase
TGME49_210960	3.082342	1.6240269	7.551388916513993e-22	5.045809397854208e-21	P3	1.6240269	replication factor C subunit 4 putative
TGME49_297110	3.075713	1.6209209	2.7050179962696797e-05	6.514565724691678e-05	P3	1.6209209	kinesin motor domain-containing protein
TGME49_313020	3.0711067	1.6187587	4.818068750617379e-10	1.7762290994200954e-09	P3	1.6187587	STAS domain-containing protein
TGME49_270840	3.0676975	1.6171563	3.171291475516064e-08	1.0211486009229384e-07	P3	1.6171563	poly(ADP-ribose) polymerase catalytic domain-containing protein
TGME49_283702	3.0614538	1.6142169	0.00018690535581098147	0.00040738132520762565	P3	1.6142169	FATC domain-containing protein
TGME49_274090	3.057608	1.6124034	0.0007146485301951468	0.001436440144223753	P3	1.6124034	hypothetical protein
TGME49_222030	3.0450346	1.6064587	0.004210049942266514	0.007435818028520071	P3	1.6064587	hypothetical protein
TGME49_276110	3.0356486	1.6020048	6.845552122782341e-36	7.111627703446452e-35	P3	1.6020048	cytochrome b5 family heme/steroid binding domain-containing protein
TGME49_207065	3.0247605	1.5968208	3.7757829704111434e-34	3.738600582425852e-33	P3	1.5968208	hypothetical protein
TGME49_219860	3.0247037	1.5967939	8.24575184522731e-32	7.653145064262622e-31	P3	1.5967939	replication licensing factor putative
TGME49_257960	3.022635	1.5958067	1.7968402899233775e-07	5.420040388818874e-07	P3	1.5958067	GDP-D-mannose pyrophosphorylase
TGME49_231170	3.0218015	1.5954089	1.7630520778598623e-05	4.3514721945074215e-05	P3	1.5954089	RecF/RecN/SMC N terminal domain-containing protein
TGME49_256960	2.9951916	1.5826483	1.4195917812963706e-06	3.936267952997093e-06	P3	1.5826483	FYVE zinc finger domain-containing protein
TGME49_264770	2.9914143	1.5808277	2.954912668727228e-19	1.7903294404641443e-18	P3	1.5808277	hypothetical protein
TGME49_217740	2.9879227	1.5791428	4.475334075405297e-28	3.70938877339285e-27	P3	1.5791428	3-ketoacyl-(acyl-carrier-protein) reductase
TGME49_213010	2.9760966	1.5734214	1.4658042271387738e-05	3.65520593516802e-05	P3	1.5734214	hypothetical protein
TGME49_268770	2.972483	1.5716685	0.008471220692231819	0.014179137924413384	P3	1.5716685	dual specificity phosphatase catalytic domain-containing protein
TGME49_260410	2.967515	1.5692554	0.003277010588355242	0.005908973405048756	P3	1.5692554	hypothetical protein
TGME49_239500	2.9649324	1.5679992	4.945525741605768e-42	5.95861774801745e-41	P3	1.5679992	proteasome subunit alpha type putative
TGME49_254625	2.9596255	1.5654147	4.776521556219393e-14	2.2613509564926563e-13	P3	1.5654147	hypothetical protein
TGME49_289940	2.9505737	1.5609955	3.6918362491786245e-06	9.817773602192274e-06	P3	1.5609955	uroporphyrinogen decarboxylase
TGME49_269240	2.94975	1.5605927	0.0001447030907583811	0.00031918576770574217	P3	1.5605927	actin-like family protein
TGME49_263430	2.9430163	1.5572956	0.005949012994955011	0.010258342947200903	P3	1.5572956	3-hydroxyisobutyrate dehydrogenase
TGME49_209705	2.9428916	1.5572344	0.017102733342109197	0.02708093097252611	P3	1.5572344	hypothetical protein
TGME49_287270	2.9309623	1.5513744	1.0126098320850877e-13	4.699177275709149e-13	P3	1.5513744	hypothetical protein
TGME49_233870	2.912354	1.5421858	1.0405630680707355e-18	6.1717666242453876e-18	P3	1.5421858	hypothetical protein
TGME49_281955	2.9095442	1.5407932	1.0481718243673494e-16	5.748609888705607e-16	P3	1.5407932	hypothetical protein
TGME49_313710	2.9088306	1.5404394	1.0410567415623908e-09	3.73524436671026e-09	P3	1.5404394	hypothetical protein
TGME49_255960	2.9018166	1.5369563	0.000682288679102606	0.0013766388398711445	P3	1.5369563	hypothetical protein
TGME49_311740	2.9011898	1.5366447	1.039724755806104e-05	2.6370916779394455e-05	P3	1.5366447	hypothetical protein
TGME49_261670	2.8951685	1.5336473	6.655264923034418e-05	0.00015324527682646864	P3	1.5336473	ribonuclease H1/H2 small subunit protein
TGME49_297800	2.8939555	1.5330427	0.0014146987735154089	0.0027149615635335476	P3	1.5330427	RecF/RecN/SMC N terminal domain-containing protein
TGME49_264720	2.8785565	1.5253456	0.02929375634498116	0.04401620104780482	P3	1.5253456	hypothetical protein
TGME49_257540	2.8563435	1.5141695	0.001168370121737651	0.0022758427232924816	P3	1.5141695	hypothetical protein
TGME49_236153	2.8503208	1.5111244	0.0007995406907627561	0.00159832441992479	P3	1.5111244	tRNA-Arg
TGME49_276820	2.8497515	1.5108361	0.003809142146723732	0.006785913218989377	P3	1.5108361	hypothetical protein
TGME49_245570	2.844463	1.5081563	8.065875553378083e-10	2.91503572630857e-09	P3	1.5081563	origin recognition complex subunit 2 protein
TGME49_216410	2.840577	1.506184	1.1724339214288624e-09	4.188822715900242e-09	P3	1.506184	hypothetical protein
TGME49_260680	2.8374097	1.5045745	2.3390642467104252e-18	1.366233515056449e-17	P3	1.5045745	small subunit DNA primase putative
TGME49_315170	2.8346338	1.5031624	0.03088599985081689	0.046178643076650636	P3	1.5031624	O-phosphoseryl-tRNA(Sec) selenium transferase
TGME49_243920	2.833539	1.5026051	2.4282373277855795e-50	3.629892472650798e-49	P3	1.5026051	DNA replication licensing factor MCM5 putative
TGME49_220450	2.8317542	1.5016961	0.02126798963877861	0.032965579095086094	P3	1.5016961	ribonuclease HI protein
TGME49_209710	2.8258374	1.4986784	1.550304737602545e-15	7.921278774223288e-15	P3	1.4986784	ribosomal protein RPL28
TGME49_219700	2.8149452	1.4931068	3.456123134164009e-26	2.6928428036115517e-25	P3	1.4931068	DNA replication licensing factor MCM4 putative
TGME49_209140	2.8017576	1.4863322	1.5542643943364605e-21	1.0287866045897919e-20	P3	1.4863322	anti-silencing protein ASF1 family protein
TGME49_242030	2.798803	1.48481	0.023156767364303617	0.03560569036208053	P3	1.48481	hypothetical protein
TGME49_288580	2.796036	1.4833829	9.580084098523547e-11	3.7338897229409263e-10	P3	1.4833829	RNA methylase putative
TGME49_319740	2.7955995	1.4831576	0.00018952030642790485	0.0004126549389250024	P3	1.4831576	transporter major facilitator family protein
TGME49_257790	2.7896671	1.480093	0.002224045910874729	0.004134776967476989	P3	1.480093	histone deacetylase HDAC4
TGME49_202510	2.780883	1.475543	3.086623202466981e-41	3.615758608604178e-40	P3	1.475543	multi-pass transmembrane protein
TGME49_217500	2.7771876	1.4736246	3.194341596155402e-15	1.5992536527047138e-14	P3	1.4736246	HMG (high mobility group) box domain-containing protein
TGME49_314690	2.768755	1.4692373	0.0003488934045526313	0.0007322946557782118	P3	1.4692373	hypothetical protein
TGME49_287500	2.7665133	1.4680688	2.19737421764356e-27	1.769210928714729e-26	P3	1.4680688	T complex chaperonin putative
TGME49_249935	2.7649128	1.467234	4.503362696444854e-50	6.637940896016271e-49	P3	1.467234	hypothetical protein
TGME49_286050	2.758695	1.4639859	7.718895161183645e-08	2.403900757055939e-07	P3	1.4639859	hypothetical protein
TGME49_207060	2.7532856	1.4611542	1.548613972054129e-71	3.6843925656251194e-70	P3	1.4611542	ribonucleoside-diphosphate reductase small subunit
TGME49_312175	2.751333	1.4601308	0.0009849923958736978	0.001942841143285673	P3	1.4601308	hypothetical protein
TGME49_297465	2.7416165	1.4550267	1.0980571523350847e-05	2.7717246588828826e-05	P3	1.4550267	hypothetical protein
TGME49_225050	2.7317362	1.4498181	2.4261638004732718e-32	2.2921006106037196e-31	P3	1.4498181	adenosylhomocysteinase putative
TGME49_263990	2.7316022	1.4497474	6.529937535941793e-09	2.208724566622522e-08	P3	1.4497474	hypothetical protein
TGME49_313200	2.7291825	1.4484688	4.550548887678644e-05	0.00010702850433119975	P3	1.4484688	leucine rich repeat-containing protein
TGME49_257490	2.725343	1.4464378	5.599388590674738e-22	3.7623258581415145e-21	P3	1.4464378	prefoldin subunit superfamily protein
TGME49_284160	2.7244523	1.4459662	1.7790298830583797e-05	4.38450142757837e-05	P3	1.4459662	histone lysine methyltransferase SET putative
TGME49_306550	2.7230368	1.4452164	1.272908937310686e-11	5.2572072784968474e-11	P3	1.4452164	hypothetical protein
TGME49_271600	2.7203526	1.4437938	0.00012776302329900105	0.0002837461201113234	P3	1.4437938	hypothetical protein
TGME49_229230	2.717178	1.4421091	0.007631431551700156	0.012898753429189419	P3	1.4421091	hypothetical protein
TGME49_254630	2.7127652	1.4397643	2.8950453312485406e-10	1.0881865984746406e-09	P3	1.4397643	CMGC kinase
TGME49_275568	2.6866217	1.4257932	7.083777836679639e-06	1.8324529129738508e-05	P3	1.4257932	GPI transamidase subunit PIG-U protein
TGME49_248840	2.686128	1.425528	0.00020526068157542975	0.00044429311035009734	P3	1.425528	transporter major facilitator family protein
TGME49_277150	2.675239	1.4196678	0.000178346714844246	0.0003892290319313958	P3	1.4196678	XPG N-terminal domain-containing protein
TGME49_260020	2.6745007	1.4192696	0.0034342153237222534	0.006170045229559275	P3	1.4192696	hypothetical protein
TGME49_203705	2.6677055	1.4155995	2.8966488614238158e-05	6.95821851068986e-05	P3	1.4155995	hypothetical protein
TGME49_308050	2.6672878	1.4153736	9.114190148972526e-30	7.95231921469235e-29	P3	1.4153736	thioredoxin domain-containing protein
TGME49_315680	2.6617908	1.4123971	1.3101375162176017e-13	6.040077217234643e-13	P3	1.4123971	vacuolar protein sorting-associated protein vps4 putative
TGME49_320040	2.656446	1.4094974	7.3309256426082925e-06	1.891750625648324e-05	P3	1.4094974	CHORD protein
TGME49_320690	2.6561244	1.4093226	1.9362927018431057e-15	9.845832727132373e-15	P3	1.4093226	gamma-soluble NSF attachment protein putative
TGME49_211410	2.6523683	1.4072812	5.025735917723707e-06	1.3211131516058023e-05	P3	1.4072812	translation initiation factor sui1 protein
TGME49_208850	2.6480005	1.4049034	2.2676880132436473e-05	5.5116238733398114e-05	P3	1.4049034	SAG-related sequence SRS11
TGME49_240610	2.6406174	1.4008753	3.2637706251524586e-50	4.8531349824009975e-49	P3	1.4008753	hypothetical protein
TGME49_242310	2.638482	1.3997082	5.467780692346491e-09	1.8628832483888046e-08	P3	1.3997082	hypothetical protein
TGME49_233720	2.6354172	1.3980314	7.721915483244344e-06	1.9859713206906738e-05	P3	1.3980314	DNA-directed RNA polymerase II RPBABC8
TGME49_207610	2.6220005	1.3906679	0.0011957722005088974	0.0023254644267782978	P3	1.3906679	rhoptry kinase family protein ROP36 (incomplete catalytic triad)
TGME49_223125	2.6192267	1.389141	1.4987298212703332e-11	6.165743823891493e-11	P3	1.389141	ubiquitin family protein
TGME49_311000	2.6173158	1.388088	0.0005162421692710707	0.0010600975836769907	P3	1.388088	hypothetical protein
TGME49_203170	2.6153905	1.3870264	6.850536053701411e-14	3.219790067310079e-13	P3	1.3870264	OB-fold nucleic acid binding domain-containing protein
TGME49_312820	2.6120865	1.3852026	5.763570507993193e-06	1.5019782940607993e-05	P3	1.3852026	hypothetical protein
TGME49_209080	2.6110675	1.3846397	0.02769441253216846	0.04188129064399191	P3	1.3846397	transport protein particle (trapp) component bet3 protein
TGME49_287515	2.610773	1.384477	3.8305642834440925e-11	1.5428205025259326e-10	P3	1.384477	hypothetical protein
TGME49_286190	2.6101937	1.384157	0.0005100899132096108	0.0010482285661723536	P3	1.384157	hypothetical protein
TGME49_297080	2.6085181	1.3832304	1.5013625952027218e-07	4.559693807652711e-07	P3	1.3832304	pyridoxal kinase
TGME49_244940	2.6054347	1.3815241	5.18971601499558e-07	1.5041984029736674e-06	P3	1.3815241	hypothetical protein
TGME49_205720	2.6036074	1.3805119	0.018237525624307898	0.028748439981878406	P3	1.3805119	Adenosine/AMP deaminase domain-containing protein
TGME49_267090	2.5989377	1.377922	1.2043550403201203e-07	3.6948720198124724e-07	P3	1.377922	hypothetical protein
TGME49_227350	2.597687	1.3772275	3.690551753190561e-07	1.083434136511904e-06	P3	1.3772275	hypothetical protein
TGME49_290620	2.5963528	1.3764864	1.934310854688415e-20	1.2311371121852564e-19	P3	1.3764864	hypothetical protein
TGME49_318710	2.5909798	1.3734977	1.0150049875796332e-08	3.3844185255024016e-08	P3	1.3734977	ATP-binding cassette sub-family F member 1
TGME49_270980	2.5904527	1.3732042	5.186983568587186e-05	0.00012098664242001485	P3	1.3732042	phosphoglycerate mutase family protein
TGME49_219840	2.589217	1.3725158	0.008290270193486144	0.013909340892765985	P3	1.3725158	hypothetical protein
TGME49_305980	2.5823364	1.3686769	9.703157673280428e-46	1.2967226219703558e-44	P3	1.3686769	pyruvate dehydrogenase complex subunit PDH-E3I
TGME49_239340	2.5781372	1.366329	0.014771490345799545	0.023646703461073344	P3	1.366329	hypothetical protein
TGME49_275430	2.5781136	1.3663158	2.2249800912792075e-08	7.269702843692142e-08	P3	1.3663158	hypothetical protein
TGME49_216400	2.5715292	1.3626266	6.157300140943518e-07	1.7718758770156373e-06	P3	1.3626266	meiotic recombination protein DMC1 family protein
TGME49_265170	2.566593	1.3598545	2.563928256641607e-06	6.942910566077272e-06	P3	1.3598545	hypothetical protein
TGME49_253540	2.5616326	1.3570635	2.642688121484081e-05	6.369904073645704e-05	P3	1.3570635	hypothetical protein
TGME49_255370	2.5510032	1.3510647	8.242574693752173e-08	2.561323983202018e-07	P3	1.3510647	TIC20
TGME49_208580	2.5409133	1.3453472	4.091936709321231e-10	1.51780840785802e-09	P3	1.3453472	DNA ligase 1 putative
TGME49_299180	2.540765	1.345263	2.0452345527578103e-10	7.770603253527875e-10	P3	1.345263	prenylated protein putative
TGME49_270900	2.536178	1.3426561	0.000216448212618218	0.0004677895608427506	P3	1.3426561	ATPase AAA family protein
TGME49_315250	2.5306227	1.3394924	3.063608982920998e-05	7.340494033971844e-05	P3	1.3394924	GAMM1 protein putative
TGME49_209720	2.525623	1.3366394	1.5633074588005403e-18	9.214022886970945e-18	P3	1.3366394	hypothetical protein
TGME49_282150	2.525421	1.3365239	2.9553042245612533e-07	8.742731867125864e-07	P3	1.3365239	hypothetical protein
TGME49_306970	2.5241494	1.3357973	3.5935753904625698e-19	2.1679526962747762e-18	P3	1.3357973	thymidylate kinase
TGME49_278280	2.5235415	1.3354498	1.3487472692236736e-06	3.7533836691476597e-06	P3	1.3354498	WD domain G-beta repeat-containing protein
TGME49_254520	2.519422	1.3330928	1.9684172304910235e-20	1.2519015006571675e-19	P3	1.3330928	mediator complex subunit MED11
TGME49_238100	2.515331	1.3307483	5.046841497212495e-45	6.588195252775383e-44	P3	1.3307483	transmembrane protein
TGME49_215560	2.5142233	1.3301128	0.004422372534855832	0.007781533006123409	P3	1.3301128	histone arginine methyltransferase PRMT5
TGME49_218780	2.5110438	1.3282871	5.368831162312422e-35	5.450137980395519e-34	P3	1.3282871	phosphoserine aminotransferase putative
TGME49_207665	2.510382	1.3279068	1.1505530197474864e-08	3.825815277475303e-08	P3	1.3279068	kinesin motor domain-containing protein
TGME49_264200	2.5101821	1.327792	0.001213659024140989	0.002356993358908897	P3	1.327792	hypothetical protein
TGME49_259610	2.5058105	1.3252773	0.002257640111664153	0.004191696720843139	P3	1.3252773	hypothetical protein
TGME49_238070	2.5053108	1.3249896	6.780918088842899e-05	0.00015601098931726268	P3	1.3249896	glutaredoxin domain-containing protein
TGME49_289120	2.5033972	1.3238872	0.0014298768534958919	0.002742220686790714	P3	1.3238872	hypothetical protein
TGME49_243510	2.4953065	1.319217	5.450611842804316e-06	1.4252590595766331e-05	P3	1.319217	OTU family cysteine protease
TGME49_262450	2.4952166	1.319165	1.396308382133222e-13	6.423322764432022e-13	P3	1.319165	hypothetical protein
TGME49_239310	2.4939375	1.3184253	3.3355782173850282e-09	1.1574483822528327e-08	P3	1.3184253	ribulose 5-phosphate isomerase
TGME49_286060	2.4938593	1.3183801	3.911793139543239e-11	1.574785741495815e-10	P3	1.3183801	tricarboxylate carrier protein
TGME49_264220	2.4896903	1.3159662	1.0800363212827216e-06	3.033583894098393e-06	P3	1.3159662	hypothetical protein
TGME49_313640	2.4849293	1.3132048	4.184387628099049e-92	1.5233335304708864e-90	P3	1.3132048	hypothetical protein
TGME49_214350	2.48166	1.3113054	7.175464667329634e-16	3.722602861195706e-15	P3	1.3113054	GTP-binding protein putative
TGME49_240600	2.4804168	1.3105825	3.7486230075077227e-56	6.4614020247775974e-55	P3	1.3105825	chaperonin cpn60 putative
TGME49_321430	2.4761045	1.3080722	2.1075024940665683e-08	6.90992471462975e-08	P3	1.3080722	hypothetical protein
TGME49_216790	2.4738789	1.3067749	0.003420878534544885	0.006148699745215173	P3	1.3067749	ATP-binding cassette sub-family E member 1 putative
TGME49_248880	2.46929	1.3040962	2.1550232340846936e-57	3.82380803257969e-56	P3	1.3040962	GTPase RAB7
TGME49_258150	2.4674108	1.302998	6.589396386829446e-20	4.089202195676818e-19	P3	1.302998	proteasome subunit alpha type 7 putative
TGME49_288700	2.4589128	1.2980206	2.810001722903121e-06	7.568008466721861e-06	P3	1.2980206	RecF/RecN/SMC N terminal domain-containing protein
TGME49_272155	2.4553363	1.2959206	8.253614041171605e-06	2.114347109242808e-05	P3	1.2959206	hypothetical protein
TGME49_268600	2.4547076	1.2955512	8.48611490202884e-05	0.00019256777663228261	P3	1.2955512	DNA polymerase epsilon subunit B protein
TGME49_268850	2.4534347	1.2948029	1.1002639017688832e-69	2.5115753822540507e-68	P3	1.2948029	enolase 2
TGME49_311690	2.4526675	1.2943517	3.370779174122085e-19	2.0393696923091066e-18	P3	1.2943517	UBA/TS-N domain-containing protein
TGME49_286220	2.4444559	1.2895133	5.294588904185172e-05	0.00012322429838729118	P3	1.2895133	GDP-L-fucose synthetase
TGME49_289580	2.4412181	1.2876012	0.025561596920790883	0.03893476061190258	P3	1.2876012	strictosidine synthase subfamily protein
TGME49_318760	2.440771	1.2873371	3.067326230226701e-30	2.715580434014121e-29	P3	1.2873371	hypothetical protein
TGME49_258950	2.4402215	1.2870121	2.0939630276820314e-18	1.2256141186280276e-17	P3	1.2870121	lectin family protein
TGME49_216700	2.4396534	1.2866762	4.59963447963506e-19	2.757169113910413e-18	P3	1.2866762	hypothetical protein
TGME49_263240	2.4393642	1.2865052	2.912745111116467e-22	1.9839552587491678e-21	P3	1.2865052	hypothetical protein
TGME49_283790	2.4381454	1.2857842	5.279594757532213e-09	1.8031321197782886e-08	P3	1.2857842	protein kinase putative
TGME49_214860	2.43803	1.2857159	0.0011879336623320657	0.0023112848910519755	P3	1.2857159	hypothetical protein
TGME49_285710	2.4360905	1.2845677	2.011637095620246e-32	1.9068784410335127e-31	P3	1.2845677	hypothetical protein
TGME49_262980	2.42957	1.2807009	3.264884449800697e-06	8.715301536983781e-06	P3	1.2807009	hypothetical protein
TGME49_202730	2.4232695	1.2769549	0.021074256795441827	0.03271933325262898	P3	1.2769549	hypothetical protein
TGME49_265470	2.4223185	1.2763885	0.03265953628092957	0.04853817410324321	P3	1.2763885	hypothetical protein
TGME49_230520	2.4220622	1.2762358	2.1633615919607996e-45	2.85050733318267e-44	P3	1.2762358	cyclophilin 1 putative
TGME49_249930	2.4168792	1.2731453	4.6367865835791164e-07	1.3485640318494908e-06	P3	1.2731453	hypothetical protein
TGME49_271888	2.4149835	1.2720133	1.0834324446503606e-10	4.211077049018383e-10	P3	1.2720133	3-ketoacyl-CoA reductase putative
TGME49_261790	2.4144778	1.2717112	0.0002994701739716109	0.0006353491809505717	P3	1.2717112	hypothetical protein
TGME49_251690	2.413105	1.2708907	1.5266483526156921e-15	7.809855836579125e-15	P3	1.2708907	seryl-tRNA synthetase cytoplasmic putative
TGME49_263440	2.4069245	1.2671909	0.03182109065568834	0.04743398017612844	P3	1.2671909	hypothetical protein
TGME49_274180	2.4015489	1.2639651	0.026227223754889114	0.039855187447605876	P3	1.2639651	hypothetical protein
TGME49_313540	2.401179	1.263743	6.781505061312804e-10	2.4666921510701097e-09	P3	1.263743	hypothetical protein
TGME49_310100	2.4011655	1.2637348	4.2066734680032146e-08	1.3412443982920028e-07	P3	1.2637348	mannosyltransferase (pig-m) protein
TGME49_249270	2.4000607	1.2630708	4.061763644613436e-87	1.3400646774376983e-85	P3	1.2630708	protein disulfide isomerase-related protein (provisional) putative
TGME49_223120	2.3987033	1.2622547	1.0918003235118299e-10	4.2358041030688635e-10	P3	1.2622547	cyclin-dependent kinase regulatory subunit protein
TGME49_313080	2.398255	1.2619851	1.402544536834649e-23	9.929498036970196e-23	P3	1.2619851	hypothetical protein
TGME49_312500	2.3965056	1.2609323	4.821086414297202e-10	1.776566136786831e-09	P3	1.2609323	hypothetical protein
TGME49_215550	2.3951933	1.2601421	2.4290065352118876e-10	9.191482614874373e-10	P3	1.2601421	hypothetical protein
TGME49_288570	2.3940046	1.2594259	4.671536256001121e-25	3.494755998067801e-24	P3	1.2594259	hypothetical protein
TGME49_240800	2.3898206	1.2569023	3.87732114344655e-74	9.717464206988e-73	P3	1.2569023	MORN repeat-containing protein
TGME49_289350	2.3892531	1.2565597	0.019275624973379795	0.030182040883419678	P3	1.2565597	ATP-binding cassette G family transporter ABCG84
TGME49_209800	2.3851614	1.2540869	9.148373739294788e-16	4.722931821643263e-15	P3	1.2540869	formate/nitrite transporter protein
TGME49_229370	2.3834577	1.253056	0.007340943000573496	0.012442625844439845	P3	1.253056	AP2 domain transcription factor AP2VIII-1
TGME49_290240	2.3830085	1.252784	8.615352959690192e-07	2.4467138903007183e-06	P3	1.252784	hypothetical protein
TGME49_221170	2.380168	1.2510633	1.4022884577653522e-11	5.7746115623043224e-11	P3	1.2510633	CAAX metallo endopeptidase
TGME49_309790	2.3784297	1.2500093	0.0044159287641161536	0.007771813782397382	P3	1.2500093	hypothetical protein
TGME49_249740	2.3770273	1.2491584	7.980524516538009e-14	3.728070247050886e-13	P3	1.2491584	translation machinery associated tma7 protein
TGME49_223040	2.375411	1.2481772	2.3712129985461023e-33	2.3126172038938084e-32	P3	1.2481772	hypothetical protein
TGME49_227150	2.3751087	1.2479936	1.2415585162371934e-31	1.1422879333485114e-30	P3	1.2479936	glutaredoxin putative
TGME49_221922	2.3733902	1.2469493	6.766064300573416e-05	0.00015571165962573042	P3	1.2469493	NifU family domain-containing protein
TGME49_202580	2.3708305	1.2453926	0.009409775636554275	0.015604744752864205	P3	1.2453926	ATPase AAA family protein
TGME49_251530	2.369048	1.2443075	0.022678005587669695	0.0349458922082573	P3	1.2443075	hypothetical protein
TGME49_284590	2.3671434	1.2431471	0.008448306797467846	0.014143587554294039	P3	1.2431471	mediator complex subunit MED10
TGME49_240510	2.3649678	1.2418206	3.4664020413101937e-06	9.229896482000597e-06	P3	1.2418206	hypothetical protein
TGME49_231940	2.3648932	1.241775	1.632207729657701e-06	4.496290438580868e-06	P3	1.241775	ThiF family protein
TGME49_306930	2.3603988	1.2390306	1.6085626356580326e-24	1.1783104961637246e-23	P3	1.2390306	proteasome subunit beta type 7 precursor putative
TGME49_203440	2.3591852	1.2382886	0.0028420891550965883	0.005200235052847874	P3	1.2382886	anaphase-promoting complex subunit APC10
TGME49_267710	2.3583848	1.2377992	1.8561896787368536e-08	6.100147092066718e-08	P3	1.2377992	CPSF A subunit region protein
TGME49_249920	2.3582516	1.2377176	5.095639482385987e-06	1.3382391501315934e-05	P3	1.2377176	diphthine synthase putative
TGME49_210778	2.3575265	1.237274	4.9044490362098546e-11	1.956682879538424e-10	P3	1.237274	hemimethylated DNA binding domain-containing protein
TGME49_234190	2.3566663	1.2367475	4.697027969176001e-28	3.8893233556529905e-27	P3	1.2367475	serine hydroxymethyltransferase 2 putative
TGME49_283800	2.35312	1.2345749	2.1308997109934416e-32	2.0176658025841487e-31	P3	1.2345749	hypothetical protein
TGME49_285700	2.3529322	1.2344598	6.691633602871595e-21	4.334166979283243e-20	P3	1.2344598	ubiquitin fusion degradation protein UFD1AP
TGME49_267530	2.3525054	1.2341981	8.478714050116234e-08	2.633733683975054e-07	P3	1.2341981	hypothetical protein
TGME49_286910	2.3497927	1.2325335	0.0017161322549714953	0.0032527946646071027	P3	1.2325335	hypothetical protein
TGME49_266620	2.3493314	1.2322502	3.0554198024150774e-18	1.7760547592014965e-17	P3	1.2322502	thioredoxin domain-containing protein
TGME49_239530	2.3458	1.23008	2.9283195619822024e-20	1.8526282412360813e-19	P3	1.23008	alanine-glyoxylate aminotransferase
TGME49_261950	2.344749	1.2294335	5.374530100879455e-38	5.8571975783261775e-37	P3	1.2294335	ATP synthase beta subunit ATP-B
TGME49_217580	2.343648	1.228756	4.817652047217448e-05	0.00011296471180121756	P3	1.228756	DNA-directed RNA polymerase III RPC6
TGME49_243540	2.3395438	1.2262273	1.23263916936028e-07	3.776159022276723e-07	P3	1.2262273	WD domain G-beta repeat-containing protein
TGME49_234505	2.3388975	1.2258286	2.2144838889296248e-07	6.61837612381444e-07	P3	1.2258286	phenylalanyl-tRNA synthetase alpha chain A putative
TGME49_258110	2.338842	1.2257943	6.2175505574298674e-09	2.108973173014163e-08	P3	1.2257943	N-acetylglucosaminylphosphatidylinositol deacetylase
TGME49_276910	2.3301086	1.2203972	2.487194415086641e-07	7.396776066838651e-07	P3	1.2203972	endoplasmic reticulum lumen protein retaining receptor (ERD2) family protein
TGME49_231800	2.3264468	1.2181282	1.7004755200902138e-07	5.138538906147387e-07	P3	1.2181282	helicase putative
TGME49_249510	2.3249078	1.2171735	1.6164218398232807e-05	4.004781126179944e-05	P3	1.2171735	hypothetical protein
TGME49_257625	2.3239486	1.2165782	0.0002885571993669637	0.0006134291733836837	P3	1.2165782	tetrahydrofolate dehydrogenase/cyclohydrolase NAD(P)-binding domain-containing protein
TGME49_205100	2.3195925	1.2138714	0.0003103170503683787	0.0006568766434614853	P3	1.2138714	hypothetical protein
TGME49_211070	2.3180037	1.2128829	2.7796308698202836e-21	1.8269853950585305e-20	P3	1.2128829	hypothetical protein
TGME49_244040	2.3174887	1.2125623	0.00043533430073651236	0.0009020690637930774	P3	1.2125623	HEAT repeat-containing protein
TGME49_246140	2.3140624	1.2104278	0.0006324493735709119	0.0012840546656682505	P3	1.2104278	hypothetical protein
TGME49_243520	2.313754	1.2102355	0.005406566345611039	0.009382342172802718	P3	1.2102355	hypothetical protein
TGME49_234580	2.31325	1.2099212	0.000285500369056215	0.0006073894501382347	P3	1.2099212	ImpB/MucB/SamB family protein
TGME49_209940	2.3120613	1.2091796	1.1869744562050926e-05	2.985463447620075e-05	P3	1.2091796	transporter/permease protein
TGME49_249020	2.3105214	1.2082185	4.0665998829761745e-06	1.0777063888175956e-05	P3	1.2082185	kinesin motor domain-containing protein
TGME49_263110	2.310354	1.2081139	0.02985851237063266	0.04482491921122706	P3	1.2081139	hypothetical protein
TGME49_211060	2.309039	1.2072926	4.762156179091779e-20	2.9727399178572927e-19	P3	1.2072926	hypothetical protein
TGME49_251500	2.3081303	1.2067246	5.643040635922551e-13	2.527100806521838e-12	P3	1.2067246	eukaryotic initiation factor-3 subunit 3 putative
TGME49_290250	2.305309	1.2049601	9.552846085655969e-05	0.0002154428252054748	P3	1.2049601	hypothetical protein
TGME49_249620	2.304986	1.2047579	0.00016694497655439207	0.00036576323527325434	P3	1.2047579	histone deacetylase HDAC2
TGME49_237110	2.3039577	1.2041142	4.3337733119284935e-08	1.380205482373607e-07	P3	1.2041142	replication factor C subunit 2 putative
TGME49_293590	2.3030005	1.2035147	3.250360594298885e-40	3.7503477567552436e-39	P3	1.2035147	3-oxoacyl-acyl-carrier protein synthase I/II putative
TGME49_219530	2.3007352	1.2020949	0.02647784331942728	0.04015655677426518	P3	1.2020949	hypothetical protein
TGME49_242320	2.3001254	1.2017125	1.0785569786485059e-11	4.47860975499768e-11	P3	1.2017125	B-box zinc finger domain-containing protein
TGME49_286630	2.2990766	1.2010546	1.4009150463862701e-68	3.12193363635315e-67	P3	1.2010546	redoxin domain-containing protein
TGME49_220140	2.2955885	1.1988641	0.0012505212269733191	0.0024230103883956535	P3	1.1988641	EF hand domain-containing protein
TGME49_218370	2.2945724	1.1982253	0.0001238292162113253	0.0002754441822809727	P3	1.1982253	hypothetical protein
TGME49_309265	2.2933638	1.1974652	2.1772102364219804e-17	1.2210303888990736e-16	P3	1.1974652	oxidoreductase short chain dehydrogenase/reductase family protein
TGME49_267390	2.293029	1.1972547	9.015978500793816e-17	4.960843936006812e-16	P3	1.1972547	DNA-directed RNA polymerase I RPAC1
TGME49_313750	2.291579	1.196342	7.550177255442406e-06	1.945950476028885e-05	P3	1.196342	hypothetical protein
TGME49_258140	2.287929	1.1940423	7.74958012375645e-05	0.00017709132501419637	P3	1.1940423	hypothetical protein
TGME49_278160	2.2849915	1.1921887	9.824238604665967e-05	0.00022109117840396684	P3	1.1921887	vesicle transport v-snare protein
TGME49_243390	2.2828746	1.1908516	6.346105708290774e-08	1.9895771645220445e-07	P3	1.1908516	hypothetical protein
TGME49_300260	2.2823684	1.1905317	3.5713636430612763e-20	2.2393271959387927e-19	P3	1.1905317	threonyl-tRNA synthetase family protein
TGME49_201870	2.2820754	1.1903465	0.0013373723753139822	0.0025788691967812546	P3	1.1903465	tetratricopeptide repeat-containing protein
TGME49_261260	2.2815304	1.1900018	0.0036271448372230918	0.006483569374642589	P3	1.1900018	histone lysine demethylase JMJD6a
TGME49_281570	2.281132	1.18975	8.793613211646858e-12	3.6731383375652503e-11	P3	1.18975	hypothetical protein
TGME49_238970	2.2806678	1.1894563	0.0007952844332300765	0.0015901923113307828	P3	1.1894563	hypothetical protein
TGME49_236280	2.2803578	1.1892602	0.02057238594060686	0.032022552829776174	P3	1.1892602	hypothetical protein
TGME49_209095	2.2800305	1.189053	3.7508151505907145e-20	2.346621093473272e-19	P3	1.189053	hypothetical protein
TGME49_321590	2.2798574	1.1889436	1.6597521140174814e-33	1.626248997098799e-32	P3	1.1889436	hypothetical protein
TGME49_249590	2.2779038	1.1877068	3.1868197468427225e-39	3.588783944244484e-38	P3	1.1877068	proteasome subunit alpha type 5-2 putative
TGME49_209060	2.2745368	1.1855729	1.752793757473697e-06	4.817473503294125e-06	P3	1.1855729	thrombospondin type 1 domain-containing protein
TGME49_308580	2.2701387	1.1827805	0.0095620202689638	0.0158323511452006	P3	1.1827805	Lon protease family protein
TGME49_299172	2.2670233	1.1807992	1.2151031008004236e-07	3.725140032435709e-07	P3	1.1807992	hypothetical protein
TGME49_221460	2.2651844	1.1796285	8.592914154806125e-11	3.364661703824411e-10	P3	1.1796285	phosphoglycerate mutase family protein
TGME49_314422	2.264355	1.1791002	1.795953254759056e-07	5.41930017495355e-07	P3	1.1791002	rhodanese family domain-containing protein
TGME49_286180	2.260597	1.1767038	0.008070619836643913	0.013567765752447152	P3	1.1767038	tRNA ligases class I (M) protein
TGME49_273030	2.260568	1.1766852	4.250804069915398e-11	1.7007243569164118e-10	P3	1.1766852	phosphoglycerate mutase family protein
TGME49_318410	2.2595787	1.1760538	1.8338890591477724e-16	9.884509887404013e-16	P3	1.1760538	TCP-1 chaperonin putative
TGME49_218400	2.2591348	1.1757703	1.05969459017004e-06	2.9794209416032482e-06	P3	1.1757703	NEK kinase
TGME49_219540	2.2589052	1.1756237	4.838148339374269e-21	3.1505783249310005e-20	P3	1.1756237	cytosolic tRNA-Ala synthetase
TGME49_266750	2.2585547	1.1753999	3.3638814892364775e-32	3.167373808036933e-31	P3	1.1753999	transporter/permease protein putative
TGME49_201250	2.250479	1.170232	1.5861696490687928e-05	3.930982645550183e-05	P3	1.170232	histone lysine methyltransferase SET putative
TGME49_244300	2.245952	1.167327	0.0018694387837394529	0.0035228201623077686	P3	1.167327	hypothetical protein
TGME49_312065	2.2457795	1.1672163	6.192570060178435e-09	2.1013437817704727e-08	P3	1.1672163	hypothetical protein
TGME49_319950	2.245351	1.166941	0.0001694286440624753	0.0003710122706123066	P3	1.166941	rRNA-processing protein FCF1 putative
TGME49_238950	2.2448883	1.1666436	3.648583545017925e-22	2.4712058236745306e-21	P3	1.1666436	fatty acyl-CoA desaturase putative
TGME49_320010	2.2437088	1.1658854	2.522446528849861e-05	6.100968895379704e-05	P3	1.1658854	hypothetical protein
TGME49_290210	2.2423217	1.1649933	0.002115371927402864	0.003951875978510195	P3	1.1649933	hypothetical protein
TGME49_300270	2.2405188	1.1638328	2.0936550347301118e-11	8.542517112720061e-11	P3	1.1638328	hypothetical protein
TGME49_251550	2.240352	1.1637254	9.197385247338937e-06	2.3489904989121458e-05	P3	1.1637254	acyl-coa-binding protein
TGME49_216450	2.2385573	1.1625693	2.981077825306121e-27	2.3888219461608632e-26	P3	1.1625693	peptidase T1 family protein
TGME49_203730	2.2381582	1.162312	0.019339551950943237	0.030270914710464527	P3	1.162312	hypothetical protein
TGME49_208040	2.237927	1.1621629	1.0207098381153312e-05	2.5911978637577663e-05	P3	1.1621629	aldo-keto reductase
TGME49_214610	2.2329953	1.1589801	8.149575532748486e-05	0.00018577952752926778	P3	1.1589801	hypothetical protein
TGME49_223540	2.231227	1.1578373	3.2204621584040173e-10	1.2040736339035118e-09	P3	1.1578373	importin-beta N-terminal domain-containing protein
TGME49_226000	2.2296367	1.1568086	2.5403729321441555e-19	1.5413785765006852e-18	P3	1.1568086	ATP synthase putative
TGME49_234970	2.2293072	1.1565955	4.1647698545738394e-05	9.839341592092489e-05	P3	1.1565955	Tyrosine kinase-like (TKL) protein
TGME49_298050	2.2271726	1.1552134	0.00011668328616412261	0.00026009686855164415	P3	1.1552134	hypothetical protein
TGME49_290005	2.2253928	1.15406	5.120999837612414e-47	7.044293913432321e-46	P3	1.15406	proteasome subunit beta type 1 putative
TGME49_242810	2.225171	1.1539162	0.00010114418203182647	0.00022713740001084986	P3	1.1539162	hypothetical protein
TGME49_261475	2.2234092	1.1527735	0.008511775621235203	0.014232915639863893	P3	1.1527735	hypothetical protein
TGME49_280440	2.2210734	1.151257	0.004046683289988799	0.007174283599337825	P3	1.151257	ubiquitin conjugating enzyme E2 putative
TGME49_216980	2.2195637	1.1502762	0.00032293241875882883	0.0006811906115976695	P3	1.1502762	WDR8 protein isoform 3 family protein
TGME49_314730	2.216408	1.1482235	0.017975307819450802	0.028377467260389058	P3	1.1482235	ALG6 ALG8 glycosyltransferase family protein
TGME49_283590	2.2152185	1.147449	0.028595359877677414	0.04310483839494261	P3	1.147449	NLI interacting factor family phosphatase
TGME49_230220	2.214983	1.1472956	4.492304205271327e-09	1.541104846373746e-08	P3	1.1472956	hypothetical protein
TGME49_211450	2.214183	1.1467745	0.00020035308694587288	0.00043467304709602934	P3	1.1467745	hypothetical protein
TGME49_277000	2.2131639	1.1461103	6.15901751765975e-11	2.439918478149824e-10	P3	1.1461103	transport protein Sec24 putative
TGME49_253730	2.2077978	1.142608	7.026380595863439e-07	2.013053273835231e-06	P3	1.142608	importin-beta N-terminal domain-containing protein
TGME49_306960	2.207238	1.1422422	3.1384337242073234e-06	8.391013369628065e-06	P3	1.1422422	phenylalanine--tRNA ligase beta subunit protein
TGME49_215150	2.2041306	1.1402097	9.603662613270086e-36	9.9402615725097e-35	P3	1.1402097	AP2 domain transcription factor AP2X-9
TGME49_203450	2.203423	1.1397465	2.563396039702515e-10	9.678338377884417e-10	P3	1.1397465	DUF3228 domain-containing protein
TGME49_313430	2.2021167	1.138891	3.332734566486635e-05	7.953737255876268e-05	P3	1.138891	hypothetical protein
TGME49_237220	2.2015429	1.1385149	4.03601364984734e-05	9.540490144587359e-05	P3	1.1385149	DNA replication licensing factor Mcm7 putative
TGME49_310200	2.1967773	1.1353886	0.0015237762462240114	0.0029090900035280286	P3	1.1353886	hypothetical protein
TGME49_216785	2.1941988	1.1336943	1.787186672916885e-11	7.31326484469768e-11	P3	1.1336943	hypothetical protein
TGME49_310110	2.1938415	1.1334593	4.822075831833125e-09	1.6508817379676762e-08	P3	1.1334593	hypothetical protein
TGME49_272415	2.193791	1.1334261	0.03186023740738112	0.04748395361615333	P3	1.1334261	hypothetical protein
TGME49_320570	2.1925082	1.1325822	6.117981209111049e-16	3.1955763322295556e-15	P3	1.1325822	elongation factor Tu putative
TGME49_209240	2.1904352	1.1312175	5.254057042108997e-05	0.0001224159055935244	P3	1.1312175	RNA methyltransferase
TGME49_279390	2.1903603	1.1311682	5.410999753138648e-37	5.76309002711337e-36	P3	1.1311682	proliferation-associated protein 2G4 putative
TGME49_211390	2.1899652	1.130908	5.663836616058556e-05	0.00013149192979447654	P3	1.130908	hypothetical protein
TGME49_265180	2.1864817	1.1286113	0.00800484307234042	0.0134705926656679	P3	1.1286113	hypothetical protein
TGME49_304640	2.1862066	1.1284298	0.015067915494905154	0.024071044877996772	P3	1.1284298	hypothetical protein
TGME49_235540	2.1847022	1.1274366	1.30277717835694e-26	1.0245117363503459e-25	P3	1.1274366	eukaryotic initiation factor-2 beta putative
TGME49_257440	2.1829143	1.1262555	0.0008320458976924277	0.0016582018999316292	P3	1.1262555	SCO1/SenC protein
TGME49_286230	2.1823297	1.125869	0.011968507269602946	0.019462074008291582	P3	1.125869	hypothetical protein
TGME49_289210	2.18182	1.125532	2.97335708016394e-21	1.9527973482942956e-20	P3	1.125532	prefoldin subunit protein
TGME49_251620	2.181172	1.1251035	0.0003997632683856476	0.0008330620687848951	P3	1.1251035	flap structure-specific endonuclease 1 putative
TGME49_258080	2.179127	1.1237502	0.015857644035975	0.02526096973365614	P3	1.1237502	hypothetical protein
TGME49_206600	2.1790085	1.1236718	0.001652691314150359	0.003139593081267191	P3	1.1236718	sigma-70 region 3 protein
TGME49_211730	2.176486	1.1220007	5.704852654654549e-15	2.8259932857016024e-14	P3	1.1220007	histone lysine methyltransferase SET8
TGME49_216630	2.17081	1.1182334	0.006733889226803953	0.011487462817529022	P3	1.1182334	trigger factor protein putative
TGME49_239710	2.1640668	1.113745	0.00041658303489208395	0.0008659759568541819	P3	1.113745	phosphomannomutase
TGME49_205570	2.1633732	1.1132826	0.0015070338792933864	0.002879078974103583	P3	1.1132826	hypothetical protein
TGME49_285720	2.1610162	1.11171	0.006974259586913845	0.011866357065083467	P3	1.11171	ATP binding protein putative
TGME49_271290	2.1586435	1.110125	0.00029014883300083406	0.0006165024008868037	P3	1.110125	hypothetical protein
TGME49_239083	2.1559355	1.108314	0.006124758631672223	0.010535582770489531	P3	1.108314	hypothetical protein
TGME49_218940	2.1546893	1.1074798	1.3605553470811434e-09	4.840459335066275e-09	P3	1.1074798	hypothetical protein
TGME49_224310	2.154233	1.1071743	3.793482767591172e-07	1.1132646092798832e-06	P3	1.1071743	DHHC zinc finger domain-containing protein
TGME49_288900	2.1536489	1.106783	0.0003337612323778288	0.0007024538670977179	P3	1.106783	Yos1 family protein
TGME49_251520	2.1534135	1.1066254	0.006553014720572538	0.011201530526200295	P3	1.1066254	hypothetical protein
TGME49_247930	2.1532047	1.1064855	4.796021064066758e-05	0.00011251998307529956	P3	1.1064855	SNARE domain-containing protein
TGME49_275740	2.1477551	1.1028296	0.004031425842601402	0.0071502357552732975	P3	1.1028296	hypothetical protein
TGME49_288590	2.1457872	1.1015071	6.310698943115322e-09	2.1388508536738368e-08	P3	1.1015071	hypothetical protein
TGME49_210787	2.1451883	1.1011043	6.270929414248545e-06	1.6291685583741376e-05	P3	1.1011043	Erv1 / Alr family protein
TGME49_205240	2.140344	1.0978426	2.250731392592238e-06	6.1282003036215485e-06	P3	1.0978426	cleft lip and palate transmembrane protein 1 (clptm1) protein
TGME49_229180	2.1394184	1.0972186	9.154483410446891e-09	3.0657718828165915e-08	P3	1.0972186	HEAT repeat-containing protein
TGME49_233350	2.1391892	1.0970641	1.39487767032191e-52	2.2270579968882516e-51	P3	1.0970641	nuclear transport factor 2 putative
TGME49_205440	2.1389465	1.0969005	1.0322048982130703e-22	7.11673679208783e-22	P3	1.0969005	CCT chaperonin gamma subunit
TGME49_235620	2.1384215	1.0965463	0.0007065293985545615	0.001422829589936058	P3	1.0965463	deoxyhypusine synthase
TGME49_248860	2.1374252	1.095874	6.281144507156173e-07	1.8068987230054851e-06	P3	1.095874	hypothetical protein
TGME49_278630	2.1364124	1.0951902	0.02072073693493537	0.032235650055712675	P3	1.0951902	tetratricopeptide repeat-containing protein
TGME49_238505	2.1363788	1.0951674	0.0006194317883345173	0.001259138600306458	P3	1.0951674	hypothetical protein
TGME49_232450	2.136162	1.0950211	0.0018230730757316212	0.0034392841629728105	P3	1.0950211	SWI2/SNF2-containing protein RAD54
TGME49_228360	2.1357758	1.0947602	5.765967252567797e-13	2.579415223262056e-12	P3	1.0947602	peptidyl-prolyl isomerase FKBP12 putative
TGME49_235150	2.134485	1.093888	9.692077416017138e-28	7.91675878681632e-27	P3	1.093888	transporter major facilitator family protein
TGME49_218540	2.1319995	1.0922071	5.356664098272707e-27	4.260111579473756e-26	P3	1.0922071	peptidase S15 putative
TGME49_314418	2.1318707	1.0921199	1.853902672452584e-07	5.586179797193908e-07	P3	1.0921199	clathrin adaptor complex small chain family protein
TGME49_294620	2.1318164	1.0920832	3.7384834949988255e-16	1.980880275957345e-15	P3	1.0920832	eukaryotic initiation factor-3 subunit 8 putative
TGME49_227930	2.1315043	1.091872	1.5685520740288555e-14	7.600683199797885e-14	P3	1.091872	hypothetical protein
TGME49_281490	2.1309512	1.0914975	9.399495423127134e-09	3.1428399977724374e-08	P3	1.0914975	glutamine amidotransferase subunit pdxt putative
TGME49_290160	2.1303062	1.0910609	3.2321760592052146e-10	1.207918539648108e-09	P3	1.0910609	sortilin putative
TGME49_232220	2.1283805	1.0897561	0.00788059428685163	0.013282677977798616	P3	1.0897561	SWIB/MDM2 domain-containing protein
TGME49_279340	2.1241856	1.0869098	6.071433195119454e-14	2.861569462387216e-13	P3	1.0869098	hypothetical protein
TGME49_239270	2.123673	1.0865616	1.7956677838099842e-29	1.553914969473271e-28	P3	1.0865616	hypothetical protein
TGME49_232440	2.1233706	1.0863562	4.0421736791012025e-49	5.816047511701661e-48	P3	1.0863562	Brf1p family coiled coil protein
TGME49_212760	2.1216586	1.0851924	0.02622412981212014	0.03985765707992923	P3	1.0851924	hypothetical protein
TGME49_318430	2.1213298	1.0849689	1.4861375161601112e-83	4.5313781449416245e-82	P3	1.0849689	malate dehydrogenase MDH
TGME49_311290	2.1191385	1.0834779	4.728995086178683e-09	1.620985896828943e-08	P3	1.0834779	protein tyrosine phosphatase family protein ptpla protein
TGME49_310710	2.1191177	1.0834638	0.0207899528226449	0.03231951804528968	P3	1.0834638	small ribosomal subunit Rsm22 protein
TGME49_214850	2.1185565	1.0830816	2.2978481768438728e-06	6.25245673377041e-06	P3	1.0830816	1-deoxy-D-xylulose 5-phosphate reductoisomerase putative
TGME49_244290	2.118057	1.0827414	3.169142707501855e-14	1.5182404598729815e-13	P3	1.0827414	adapter-related protein
TGME49_238470	2.1176498	1.082464	0.016856524306708497	0.026736188599898587	P3	1.082464	SAG-related sequence SRS22C
TGME49_288710	2.1144822	1.0803044	2.8895651904490776e-08	9.34709597799039e-08	P3	1.0803044	hypothetical protein
TGME49_313230	2.1134784	1.0796194	3.4591544381087123e-14	1.6515555898398067e-13	P3	1.0796194	eukaryotic initiation factor-2 alpha subunit
TGME49_263290	2.1119716	1.0785904	1.1906652550275904e-06	3.333231270786552e-06	P3	1.0785904	rhomboid protease ROM2
TGME49_310360	2.110524	1.0776012	1.753958531197732e-23	1.2365554052166982e-22	P3	1.0776012	hypothetical protein
TGME49_226960	2.109074	1.0766098	1.231874925892747e-15	6.317192242920546e-15	P3	1.0766098	phosphofructokinase PFKII
TGME49_236030	2.1062586	1.0746826	0.0032082702052200025	0.005797400546274741	P3	1.0746826	hypothetical protein
TGME49_219100	2.1049278	1.0737708	1.6427446368920467e-05	4.065227425487907e-05	P3	1.0737708	cyclin-dependent kinase regulatory subunit protein
TGME49_318590	2.1043203	1.0733544	0.032595116834172135	0.048459488959939775	P3	1.0733544	MRP family domain-containing protein
TGME49_203380	2.1037624	1.0729718	4.166530412150578e-06	1.1031509674302127e-05	P3	1.0729718	DnaJ domain-containing protein
TGME49_255510	2.103627	1.0728788	2.7397686330569394e-14	1.314030998001074e-13	P3	1.0728788	ankyrin repeat-containing protein
TGME49_266730	2.1033707	1.0727031	9.568947286243914e-05	0.0002157483416433959	P3	1.0727031	leucyl-tRNA synthetase (LeuRS2)
TGME49_240070	2.103003	1.0724509	3.4335653669262657e-13	1.5507964218748256e-12	P3	1.0724509	RNA recognition motif-containing protein
TGME49_253160	2.1019273	1.0717127	0.00024294496339628555	0.0005214518833151278	P3	1.0717127	hypothetical protein
TGME49_264090	2.098843	1.0695944	0.02899368821721372	0.043627416832814375	P3	1.0695944	hypothetical protein
TGME49_261770	2.0975323	1.068693	0.00025653295282375584	0.0005494997006212128	P3	1.068693	hypothetical protein
TGME49_273490	2.0938249	1.0661408	4.73811157492768e-08	1.4993664429314045e-07	P3	1.0661408	glutamine synthetase type I putative
TGME49_266035	2.0918434	1.0647749	0.014668965657677155	0.02350039528542133	P3	1.0647749	hypothetical protein
TGME49_297190	2.0916884	1.0646679	0.001894184393467918	0.0035662686997837796	P3	1.0646679	hypothetical protein
TGME49_254770	2.090263	1.0636845	6.038665044631059e-11	2.3933629735783166e-10	P3	1.0636845	Ser/Thr phosphatase family protein
TGME49_304660	2.0901072	1.0635769	0.005263416313177806	0.009139558836574784	P3	1.0635769	prostaglandin-E synthase
TGME49_287210	2.0884652	1.0624431	1.4468277129224804e-34	1.4512953519410058e-33	P3	1.0624431	proteasome subunit alpha2 protease of the acylase family and NTN hydrolase fold putative
TGME49_257020	2.0883436	1.0623591	0.010065292779177983	0.01657789836445734	P3	1.0623591	hypothetical protein
TGME49_300060	2.0883195	1.0623425	9.89776604275367e-20	6.115327871038588e-19	P3	1.0623425	signal peptidase subunit protein
TGME49_277920	2.0878267	1.062002	1.0552273325375297e-16	5.783549675932496e-16	P3	1.062002	hypothetical protein
TGME49_318340	2.0872178	1.0615811	7.857860808724939e-06	2.018476045939502e-05	P3	1.0615811	hypothetical protein
TGME49_264000	2.0868945	1.0613576	1.846818292569665e-12	8.019654138325652e-12	P3	1.0613576	aldehyde dehydrogenase
TGME49_265160	2.0853887	1.0603163	1.3868089024137157e-09	4.931784416752102e-09	P3	1.0603163	hypothetical protein
TGME49_254606	2.085362	1.0602978	1.2830976205176492e-13	5.921881149121347e-13	P3	1.0602978	hypothetical protein
TGME49_297640	2.0851746	1.0601681	0.0331047810621956	0.049173932615424555	P3	1.0601681	acyltransferase domain-containing protein
TGME49_240280	2.085046	1.0600792	1.5113782269689345e-07	4.5868129734026666e-07	P3	1.0600792	S1/P1nuclease
TGME49_243530	2.0850403	1.0600753	0.013209351905070952	0.021336046316739198	P3	1.0600753	pentatricopeptide repeat domain-containing protein
TGME49_253360	2.0849438	1.0600085	8.358379810327415e-12	3.501729954267131e-11	P3	1.0600085	hypothetical protein
TGME49_226480	2.083998	1.0593538	0.00916584056876732	0.015239112095237949	P3	1.0593538	DNA topoisomerase family protein
TGME49_320300	2.083807	1.0592216	9.406010266848155e-05	0.00021241487356630888	P3	1.0592216	SWI2/SNF2 Brahma-like putative
TGME49_235020	2.080491	1.0569241	1.78574579350277e-14	8.633319388623008e-14	P3	1.0569241	COPI protein putative
TGME49_251680	2.0774844	1.0548376	8.69230728884241e-49	1.2422204291296613e-47	P3	1.0548376	histamine-releasing factor putative
TGME49_243950	2.0754027	1.0533913	6.327256176276855e-25	4.712522545399852e-24	P3	1.0533913	prohibitin putative
TGME49_225350	2.074327	1.0526433	1.2369494443538646e-05	3.1065343464206784e-05	P3	1.0526433	hypothetical protein
TGME49_272010	2.0736783	1.0521921	3.957133341574277e-09	1.3680699223469645e-08	P3	1.0521921	Gar1 protein RNA binding region protein
TGME49_211220	2.073313	1.0519379	2.1405513513036687e-12	9.261832332536262e-12	P3	1.0519379	hypothetical protein
TGME49_215400	2.0729122	1.051659	0.00010874072006719794	0.00024335562312865762	P3	1.051659	RNA recognition motif-containing protein
TGME49_231910	2.0716002	1.0507456	1.91302254647409e-24	1.4001203143431686e-23	P3	1.0507456	ATP synthase F1 gamma subunit
TGME49_290150	2.0683439	1.0484761	2.6344055831836154e-14	1.2670950771964018e-13	P3	1.0484761	hypothetical protein
TGME49_289720	2.068036	1.0482614	8.224600139680587e-14	3.8336077693014476e-13	P3	1.0482614	hypothetical protein
TGME49_244010	2.0671933	1.0476732	1.890443161348305e-05	4.641477599054588e-05	P3	1.0476732	hypothetical protein
TGME49_209970	2.0659873	1.0468314	7.957523341195919e-06	2.0422133740425627e-05	P3	1.0468314	Spc97 / Spc98 family protein
TGME49_269190	2.0648472	1.046035	7.750273260222663e-55	1.2936523311430951e-53	P3	1.046035	glyceraldehyde-3-phosphate dehydrogenase GAPDH2
TGME49_314720	2.062472	1.0443746	1.4476377840867439e-08	4.789169104738205e-08	P3	1.0443746	Sedlin N-terminal region protein putative
TGME49_314830	2.061599	1.0437638	1.1711787216146968e-07	3.594395160885803e-07	P3	1.0437638	pre-mRNA splicing factor subunit putative
TGME49_279410	2.0603163	1.0428659	1.099948899627487e-05	2.775670273753736e-05	P3	1.0428659	hypothetical protein
TGME49_231920	2.0588827	1.0418617	1.587652926260682e-11	6.515702922836599e-11	P3	1.0418617	oxidoreductase short chain dehydrogenase/reductase family protein
TGME49_226550	2.0568607	1.0404441	2.0106857810856047e-07	6.039207719434216e-07	P3	1.0404441	TBC domain containing protein
TGME49_261010	2.053475	1.0380673	3.6528138014514793e-19	2.2021174423311347e-18	P3	1.0380673	tat-binding family protein putative
TGME49_258826	2.053438	1.0380414	0.005088905656323988	0.008873017583260197	P3	1.0380414	hypothetical protein
TGME49_232210	2.0527806	1.0375794	3.491232067402847e-08	1.1198992039986497e-07	P3	1.0375794	hypothetical protein
TGME49_261580	2.0511765	1.0364517	1.712700011940852e-13	7.836112839031655e-13	P3	1.0364517	histone H2AX
TGME49_312190	2.051134	1.0364218	0.011735340117496608	0.0191381893478232	P3	1.0364218	hypothetical protein
TGME49_239690	2.0508318	1.0362092	3.078153262043154e-05	7.369070989573832e-05	P3	1.0362092	hypothetical protein
TGME49_228290	2.0464866	1.0331492	2.5422465605533667e-08	8.258390173243744e-08	P3	1.0331492	phospholipase/carboxylesterase
TGME49_236790	2.0464098	1.0330951	0.003995026078416665	0.00709014294143878	P3	1.0330951	hypothetical protein
TGME49_287480	2.0463343	1.0330418	4.453828526860103e-14	2.1109447664343675e-13	P3	1.0330418	hypothetical protein
TGME49_277950	2.0441735	1.0315176	0.0036055914048264102	0.0064477715446038236	P3	1.0315176	lipase
TGME49_225880	2.043254	1.0308685	8.175156559878546e-05	0.00018626213192536877	P3	1.0308685	UDP-glucose 4-epimerase
TGME49_288910	2.0410278	1.0292958	2.3584983759434388e-05	5.71917234660301e-05	P3	1.0292958	DUF866 domain-containing protein
TGME49_244910	2.0398295	1.0284486	1.0471003130177313e-10	4.0736108907175304e-10	P3	1.0284486	MIZ/SP-RING zinc finger domain-containing protein
TGME49_223420	2.0393472	1.0281074	0.00010209185167433983	0.00022908283189199632	P3	1.0281074	DnaJ domain-containing protein
TGME49_226870	2.0386608	1.0276217	1.5565440422454595e-13	7.140994557743157e-13	P3	1.0276217	tubulin gamma chain
TGME49_312430	2.0384173	1.0274495	7.332987618861821e-07	2.0980492353965762e-06	P3	1.0274495	hypothetical protein
TGME49_304980	2.0373874	1.0267203	0.0016016838635394732	0.0030502416936763	P3	1.0267203	hypothetical protein
TGME49_320090	2.035987	1.0257282	2.3024821437922843e-14	1.1093419387603898e-13	P3	1.0257282	hypothetical protein
TGME49_281620	2.0341747	1.0244436	0.00856241028914633	0.014311917138755176	P3	1.0244436	aldo/keto reductase family oxidoreductase
TGME49_208842	2.0331075	1.0236865	4.7744691279235514e-08	1.510305852226304e-07	P3	1.0236865	DEAD/DEAH box helicase domain-containing protein
TGME49_261000	2.0327973	1.0234663	2.0733007949752063e-09	7.30237636128465e-09	P3	1.0234663	MutS domain V domain-containing protein
TGME49_314820	2.0324404	1.023213	1.3073298341867513e-31	1.201491597338553e-30	P3	1.023213	atp synthase F1 epsilon subunit putative
TGME49_314470	2.032409	1.0231907	0.0049008417712109575	0.008568103829361984	P3	1.0231907	hypothetical protein
TGME49_273730	2.0323837	1.0231727	5.3239676445670046e-08	1.6797247189395937e-07	P3	1.0231727	phospholipase patatin family protein
TGME49_254610	2.0319107	1.0228369	5.9342721088127015e-09	2.015314122679215e-08	P3	1.0228369	Tim10/DDP family zinc finger superfamily protein
TGME49_208780	2.030601	1.0219069	0.00013903645158275517	0.0003074088665099346	P3	1.0219069	ubiquitin-conjugating enzyme subfamily protein
TGME49_311425	2.030136	1.0215764	1.8753813442952188e-17	1.0538570082446719e-16	P3	1.0215764	hypothetical protein
TGME49_280550	2.0294664	1.0211004	6.869037083290384e-08	2.146351727912341e-07	P3	1.0211004	clathrin adaptor complex small chain subfamily protein
TGME49_297500	2.0284717	1.0203931	1.054081902623185e-34	1.0611174910077974e-33	P3	1.0203931	T-complex protein 1 eta subunit
TGME49_269980	2.0272388	1.0195161	1.2412049368782636e-72	3.0124186485269586e-71	P3	1.0195161	preprotein translocase Sec61 putative
TGME49_272620	2.026106	1.0187098	9.325500832422645e-05	0.00021070941688240146	P3	1.0187098	hypothetical protein
TGME49_259230	2.0243728	1.017475	0.00843797971429748	0.014129099259904146	P3	1.017475	site-specific recombinase phage integrase family protein
TGME49_248170	2.023817	1.0170789	0.0039520365563077645	0.007019747792760331	P3	1.0170789	hypothetical protein
TGME49_214150	2.0220287	1.0158035	4.0344268379997485e-05	9.539409035203213e-05	P3	1.0158035	mitochondrial inner membrane translocase subunit TIM17 putative
TGME49_211270	2.0214028	1.0153569	9.75053872157236e-09	3.25506126649803e-08	P3	1.0153569	sushi domain (scr repeat) domain-containing protein
TGME49_270510	2.0198095	1.0142192	6.539659432104136e-16	3.4052998497873945e-15	P3	1.0142192	asparaginyl-tRNA synthetase (NOB+tRNA synthase)
TGME49_241155	2.0192945	1.0138513	3.4647346644551406e-07	1.0196219155396556e-06	P3	1.0138513	hypothetical protein
TGME49_314890	2.018203	1.0130713	0.014244307910476197	0.022876483097904916	P3	1.0130713	ThiF family protein
TGME49_320720	2.0181658	1.0130447	7.443318630305108e-08	2.3197885295777468e-07	P3	1.0130447	hypothetical protein
TGME49_248490	2.0178185	1.0127964	0.00035407474329054767	0.0007422475258952509	P3	1.0127964	hypothetical protein
TGME49_203710	2.017489	1.0125607	2.0243105481995743e-26	1.5816213589355787e-25	P3	1.0125607	AP2 domain transcription factor AP2VIIa-4
TGME49_279405	2.0163891	1.0117741	1.1320084908768911e-14	5.5233643639204054e-14	P3	1.0117741	hypothetical protein
TGME49_286650	2.0151937	1.0109185	5.7843009419040216e-05	0.000134030742812953	P3	1.0109185	hypothetical protein
TGME49_230880	2.0139215	1.0100075	0.003314612785331814	0.005971676532617855	P3	1.0100075	hypothetical protein
TGME49_301390	2.0134375	1.0096607	2.8315031175219636e-10	1.0662004159870934e-09	P3	1.0096607	ribosome biogenesis protein BOP1 putative
TGME49_273460	2.0132213	1.0095057	1.8148636414494982e-28	1.52369168147937e-27	P3	1.0095057	eukaryotic translation initiation factor 3 subunit 6 interacting protein
TGME49_242290	2.0118186	1.0085002	5.069610668249179e-25	3.782502800709591e-24	P3	1.0085002	proteasome subunit alpha1 putative
TGME49_202520	2.0110765	1.007968	6.085109990468142e-18	3.489126882518257e-17	P3	1.007968	hypothetical protein
TGME49_238190	2.007293	1.0052512	2.2024415776123634e-11	8.977713110286689e-11	P3	1.0052512	DNA-directed RNA polymerase II RPB3
TGME49_215420	2.004993	1.0035971	8.550504769906483e-14	3.978929106701386e-13	P3	1.0035971	SNARE protein
TGME49_285490	2.0035858	1.0025843	0.00042203185786257255	0.0008760091107169545	P3	1.0025843	helix-hairpin-helix motif domain-containing protein
TGME49_310870	2.0033805	1.0024365	6.549228551065015e-08	2.0509745770224367e-07	P3	1.0024365	integral membrane protein putative
TGME49_269250	2.0029082	1.0020963	1.6112920105069216e-36	1.6968793417383366e-35	P3	1.0020963	Mov34/MPN/PAD-1 family protein
TGME49_237880	2.0012348	1.0008904	1.96961567731604e-103	8.801785190799616e-102	P3	1.0008904	hypothetical protein
TGME49_227310	2.0005162	1.0003723	0.0035817841824112707	0.0064065542576547205	P3	1.0003723	hypothetical protein
TGME49_230100	1.9997064	0.99978817	0.011958915109309482	0.019450220876801056	P3	0.99978817	membrane protein putative
TGME49_232520	1.9993839	0.9995555	0.015829966438274883	0.02522163677375394	P3	0.9995555	brix domain-containing protein
TGME49_238130	1.9987117	0.9990704	4.535159175248506e-30	3.998325093334956e-29	P3	0.9990704	hypothetical protein
TGME49_259520	1.9975164	0.99820733	7.917160932688522e-09	2.664077340138935e-08	P3	0.99820733	hypothetical protein
TGME49_228350	1.9965373	0.99750006	0.007244545398104578	0.012284165916962712	P3	0.99750006	elongation factor Tu GTP binding domain-containing protein
TGME49_221210	1.9910462	0.9935267	5.504825609199538e-72	1.3171036004334079e-70	P3	0.9935267	cyclophilin
TGME49_267350	1.9909134	0.99343044	0.00013779890027257276	0.0003047524251642182	P3	0.99343044	LSM domain-containing protein
TGME49_264260	1.9892763	0.99224365	0.022811534042958326	0.03511321606102169	P3	0.99224365	hypothetical protein
TGME49_278770	1.9891388	0.992144	0.02033520727904012	0.031682560538419634	P3	0.992144	hypothetical protein
TGME49_248800	1.9867867	0.99043703	0.0063709988038299775	0.01091912660250568	P3	0.99043703	hypothetical protein
TGME49_244020	1.9867784	0.99043095	1.1814455305157675e-06	3.3096149090335563e-06	P3	0.99043095	activator of hsp90 atpase 1 family protein
TGME49_281930	1.9866103	0.9903089	4.309648131417503e-05	0.00010164559653156165	P3	0.9903089	SAG-related sequence SRS39
TGME49_254600	1.985761	0.98969203	3.0485933607076875e-09	1.0600419730151144e-08	P3	0.98969203	ubiquitin family protein
TGME49_288540	1.9848512	0.9890309	2.5492397273803635e-16	1.3601313163268826e-15	P3	0.9890309	nucleoside transporter protein
TGME49_205470	1.984713	0.98893034	4.6675282268162793e-79	1.2757910486631162e-77	P3	0.98893034	translation elongation factor 2 family protein putative
TGME49_294640	1.9846821	0.98890793	5.4217697126496755e-27	4.307833207247334e-26	P3	0.98890793	ribonucleoside-diphosphate reductase large chain
TGME49_220860	1.9840019	0.9884134	1.035783604140279e-06	2.916076106856265e-06	P3	0.9884134	DEAD/DEAH box helicase
TGME49_320410	1.9839054	0.98834324	1.3254331567353574e-06	3.6897193282092386e-06	P3	0.98834324	hypothetical protein
TGME49_231350	1.9834435	0.9880073	0.0003029789601824746	0.0006426319180565496	P3	0.9880073	glucosamine-fructose-6-phosphate aminotransferase
TGME49_202370	1.9821664	0.9870781	1.1468384075574797e-19	7.05476852893698e-19	P3	0.9870781	T-complex protein 1 epsilon subunit (TCP-1-epsilon) putative
TGME49_234420	1.9805179	0.9858777	4.8405682605612756e-05	0.00011343906639484055	P3	0.9858777	ATPase AAA family protein
TGME49_270330	1.9794542	0.98510265	0.016564098663928852	0.026292121277117664	P3	0.98510265	cell-cycle-associated protein kinase putative
TGME49_312490	1.9793848	0.9850521	6.461211175806351e-15	3.193176687586919e-14	P3	0.9850521	hypothetical protein
TGME49_248750	1.9792281	0.9849379	0.001822514180940049	0.0034389979383868756	P3	0.9849379	hypothetical protein
TGME49_203740	1.9786944	0.98454887	5.612247272028667e-23	3.898111879897543e-22	P3	0.98454887	hypothetical protein
TGME49_209190	1.9786756	0.9845351	1.5444206914400717e-05	3.833140511284997e-05	P3	0.9845351	ABC transporter transmembrane region domain-containing protein
TGME49_222090	1.9783418	0.98429173	4.670743040503815e-06	1.2312451847720105e-05	P3	0.98429173	hypothetical protein
TGME49_310400	1.9780382	0.9840703	0.007052127252347299	0.011986771336954175	P3	0.9840703	glycosyl transferase family 8 protein
TGME49_311430	1.9763002	0.98280215	1.0238029260409744e-15	5.262957707451047e-15	P3	0.98280215	fibrillarin
TGME49_310270	1.972851	0.980282	0.00015236520265508223	0.0003352113835959428	P3	0.980282	hypothetical protein
TGME49_237460	1.9727494	0.9802077	7.675106462910223e-06	1.9745339380365443e-05	P3	0.9802077	hypothetical protein
TGME49_204160	1.9725674	0.98007464	0.0007273123845555842	0.0014608514625342364	P3	0.98007464	GYF domain-containing protein
TGME49_223970	1.9710431	0.9789593	0.019173749413084862	0.03003365866893819	P3	0.9789593	translation elongation and release factors (gtpases) putative
TGME49_294890	1.9704713	0.9785407	4.245333535274251e-05	0.00010015666770649812	P3	0.9785407	hypothetical protein
TGME49_239670	1.970186	0.9783318	4.00315640605792e-07	1.172352947488391e-06	P3	0.9783318	hypothetical protein
TGME49_235490	1.969947	0.9781568	2.673923105582074e-14	1.2846390528865868e-13	P3	0.9781568	hypothetical protein
TGME49_262040	1.9693624	0.9777286	7.05097552529483e-05	0.0001618715392406636	P3	0.9777286	SAC3/GANP family protein
TGME49_261220	1.9638395	0.97367704	1.0463352481295751e-05	2.6498793120546902e-05	P3	0.97367704	transcription elongation factor SPT4
TGME49_261540	1.9635042	0.9734307	7.514076509587552e-06	1.9372371855914672e-05	P3	0.9734307	DNA-directed RNA polymerase I RPAC2
TGME49_214870	1.9626242	0.9727839	0.009353417203195633	0.015526525490996524	P3	0.9727839	ribosomal protein L9 N-terminal domain-containing protein
TGME49_267700	1.9617668	0.9721536	1.1296231681778594e-08	3.760661126696965e-08	P3	0.9721536	hypothetical protein
TGME49_244160	1.9605836	0.97128314	4.431617322841017e-05	0.000104347476745791	P3	0.97128314	transcription initiation factor TFIID complex subunit TAF12
TGME49_312520	1.9584213	0.9696912	0.00015889023280981363	0.00034911209841615137	P3	0.9696912	tRNA dimethylallyltransferase
TGME49_207450	1.9576733	0.96914005	0.0010572754060384237	0.0020728291734913016	P3	0.96914005	DNA segment Chr 10 Wayne State University 52 expressed family protein
TGME49_306540	1.9566154	0.96836025	8.965343673651494e-12	3.741170586346864e-11	P3	0.96836025	phosphotransferase enzyme family protein
TGME49_272910	1.9565586	0.9683183	1.5485804119291278e-23	1.0945029421885702e-22	P3	0.9683183	T-complex protein 1 delta subunit
TGME49_263323	1.952537	0.96534985	6.037697567121746e-11	2.394102988352595e-10	P3	0.96534985	tetratricopeptide repeat protein 11 putative
TGME49_244110	1.9523903	0.9652415	3.38251546934475e-55	5.69098120599318e-54	P3	0.9652415	nucleosome assembly protein (nap) protein
TGME49_258650	1.951337	0.96446294	0.015710055174840074	0.0250447576456586	P3	0.96446294	protoheme ferro-lyase putative
TGME49_300030	1.9513154	0.96444696	5.6384991943138856e-06	1.4707462691530289e-05	P3	0.96444696	hypothetical protein
TGME49_221670	1.9510906	0.9642807	1.5882832623510446e-14	7.69188098269319e-14	P3	0.9642807	transcriptional elongation factor FACT140
TGME49_218810	1.9508451	0.9640992	1.0682880320549319e-18	6.3317619078848806e-18	P3	0.9640992	histidyl-tRNA synthetase
TGME49_254950	1.9496144	0.9631888	0.0005507125860003021	0.0011275923639657093	P3	0.9631888	RNA cap guanine-N2 methyltransferase
TGME49_203620	1.9489963	0.96273136	3.113410675021306e-08	1.0036590290545781e-07	P3	0.96273136	hypothetical protein
TGME49_258040	1.9476849	0.9617603	0.0011163456473568133	0.002180540087320917	P3	0.9617603	hypothetical protein
TGME49_235880	1.946803	0.9611069	1.415349949515903e-25	1.080835956022723e-24	P3	0.9611069	brain protein 44 family protein
TGME49_306480	1.9454848	0.9601297	0.013988695223802666	0.022500194222098136	P3	0.9601297	CAM kinase CDPK family
TGME49_261590	1.9454057	0.9600711	6.599165656396033e-07	1.8945123430972432e-06	P3	0.9600711	ankyrin putative
TGME49_228190	1.9453624	0.96003896	2.907423594831512e-27	2.3342300077896343e-26	P3	0.96003896	eukaryotic initiation factor-3 subunit 5 putative
TGME49_205040	1.9447546	0.9595881	4.9834747117652633e-05	0.0001165939817605801	P3	0.9595881	PGAP1 family protein
TGME49_293410	1.9438261	0.95889914	0.024062756647733618	0.03683110595265642	P3	0.95889914	hypothetical protein
TGME49_247050	1.9431661	0.95840925	0.0020649650841455722	0.0038679740742278783	P3	0.95840925	hypothetical protein
TGME49_272410	1.9431137	0.9583703	5.012028485271137e-05	0.00011716466257016337	P3	0.9583703	phosphogluconate dehydrogenase (decarboxylating) NAD binding domain-containing protein
TGME49_228630	1.9430931	0.958355	8.150359995019195e-10	2.944308833102315e-09	P3	0.958355	hypothetical protein
TGME49_250100	1.942275	0.9577475	0.0008465801965597256	0.0016847823610140064	P3	0.9577475	hypothetical protein
TGME49_294812	1.9421557	0.9576589	0.018428804531348614	0.029012056490544343	P3	0.9576589	RNA recognition motif-containing protein
TGME49_221340	1.9415257	0.9571908	0.024380546738107092	0.037256757327673695	P3	0.9571908	hypothetical protein
TGME49_222860	1.9406525	0.9565418	3.635508183766809e-28	3.028156027622729e-27	P3	0.9565418	eukaryotic translation initiation factor putative
TGME49_279330	1.9401054	0.95613503	0.005118519436086212	0.008919128359229244	P3	0.95613503	DEAD/DEAH box helicase family protein
TGME49_311110	1.9386276	0.9550357	8.780331960324464e-13	3.882653598790598e-12	P3	0.9550357	Ubiquitin-fold modifier 1 precursor family protein putative
TGME49_216415	1.9382617	0.9547634	0.0018829083274086247	0.0035466199226791358	P3	0.9547634	hypothetical protein
TGME49_306640	1.9377943	0.95441544	1.1405978896629573e-08	3.794206292277801e-08	P3	0.95441544	hypothetical protein
TGME49_316150	1.9367608	0.95364577	0.0010118257123241136	0.001989264424182836	P3	0.95364577	ULK kinase
TGME49_202360	1.9357697	0.9529073	0.023137857018513806	0.03558309183874137	P3	0.9529073	methylase putative
TGME49_262430	1.9354744	0.9526872	1.4893588894386134e-05	3.7084685083132455e-05	P3	0.9526872	4-hydroxy-3-methylbut-2-en-1-yl diphosphate synthase
TGME49_207420	1.9354262	0.9526513	5.660925547765099e-12	2.3966003597205027e-11	P3	0.9526513	hypothetical protein
TGME49_284540	1.9340559	0.9516295	2.8845476073385036e-13	1.3070219469732297e-12	P3	0.9516295	ATP synthase F1 delta subunit protein
TGME49_248950	1.9330059	0.9508461	5.637083760664382e-07	1.628276656722687e-06	P3	0.9508461	carrier superfamily protein
TGME49_266850	1.9324925	0.9504628	2.9331763102774896e-08	9.48453564954199e-08	P3	0.9504628	3-demethylubiquinone-9 3-O-methyltransferase
TGME49_229990	1.9293575	0.94812053	5.7825894354893124e-36	6.014747582776199e-35	P3	0.94812053	T-complex protein 1 subunit alpha putative
TGME49_218280	1.9286844	0.94761705	7.30437109566104e-14	3.423569271584525e-13	P3	0.94761705	eukaryotic porin putative
TGME49_261730	1.9266291	0.94607884	4.326875616489027e-07	1.2605999122754856e-06	P3	0.94607884	hypothetical protein
TGME49_252280	1.9254085	0.94516456	0.0023400783874743965	0.0043399872772526904	P3	0.94516456	hypothetical protein
TGME49_209070	1.9253665	0.9451331	0.0007531828178897293	0.0015113761178181643	P3	0.9451331	hypothetical protein
TGME49_226270	1.922689	0.94312537	1.1399792490360267e-07	3.5024607993300406e-07	P3	0.94312537	hypothetical protein
TGME49_215990	1.9219079	0.9425392	3.5174039807428454e-06	9.362746303609856e-06	P3	0.9425392	helicase putative
TGME49_261480	1.9201348	0.9412076	0.0022161444711488025	0.00412280973641471	P3	0.9412076	phosphatidyl serine synthase
TGME49_213240	1.9200423	0.9411381	1.0851092425300432e-10	4.2137161666247103e-10	P3	0.9411381	hypothetical protein
[truncated: 3,692 more rows]
