# Supplementary material for: A single-parasite transcriptional atlas of Toxoplasma Gondii reveals novel control of antigen expression
Source: eLife journal article supplement (doi:10.7554/elife.54129), 2020-02-17
Supplement: supp [file elife-54129-supp-v1.zip › elife_poa_e54129_Supplementary_file_6.csv]

	fold	log2-fold	p	adjusted-p	max_cluster	abs-log2-fold	product
TGME49_207210	7.303153	2.8685195	2.4701661815114128e-133	2.609421799994119e-130	M1	2.8685195	hypothetical protein
TGME49_207130	6.411492	2.68066	0.011892652180018675	0.01606277826008276	M1	2.68066	SAG-related sequence SRS49A
TGME49_207160	6.3493915	2.6666183	5.5347953781313557e-36	1.9904066272590676e-34	M1	2.6666183	SAG-related sequence SRS49D
TGME49_209755	6.2741923	2.6494298	1.6592273991604055e-99	4.6740435834348624e-97	M1	2.6494298	hypothetical protein
TGME49_278522	5.722165	2.516561	6.477366832396673e-06	1.7686664652854374e-05	M1	2.516561	hypothetical protein
TGME49_268860	5.553148	2.4733057	1.529618758970065e-35	5.408706331404192e-34	M1	2.4733057	enolase 1
TGME49_221550	5.5174937	2.464013	1.4470974160819905e-27	3.5968883127379124e-26	M1	2.464013	CMGC kinase MAPK family MEK kinase-related (incomplete catalytic triad)
TGME49_316580	5.224491	2.3852906	0.012342038303239551	0.01661133392270703	M1	2.3852906	hypothetical protein
TGME49_278080	4.905658	2.2944465	4.755738865881504e-38	1.8521082560168013e-36	M1	2.2944465	Toxoplasma gondii family A protein
TGME49_246763	4.779507	2.256862	3.892772609053927e-05	9.00569978623453e-05	M1	2.256862	hypothetical protein
TGME49_312330	4.6485023	2.2167659	3.7453411210684333e-106	1.4387217188249694e-103	M1	2.2167659	hypothetical protein
TGME49_207350	4.55546	2.1875968	1.844160396485641e-23	3.77360762970948e-22	M1	2.1875968	hypothetical protein
TGME49_259020	4.528385	2.1789966	4.788682509382218e-64	4.398821292042296e-62	M1	2.1789966	bradyzoite antigen BAG1
TGME49_253330	4.5133476	2.174198	3.872656491650931e-71	4.743162320426379e-69	M1	2.174198	Rhoptry kinase family protein truncated (incomplete catalytic triad)
TGME49_261650	4.471286	2.1606898	1.1405502304864442e-62	1.0364290320259074e-60	M1	2.1606898	hypothetical protein
TGME49_264660	4.328325	2.1138089	1.3416356963251478e-108	5.669081634821912e-106	M1	2.1138089	SAG-related sequence SRS44
TGME49_207140	4.244079	2.0854516	0.001191062727439117	0.0019697986515827743	M1	2.0854516	SAG-related sequence SRS49B
TGME49_293790	4.095521	2.034047	1.087987392232234e-19	1.7218317325383162e-18	M1	2.034047	hypothetical protein
TGME49_243470	3.864457	1.9502656	1.463234341891992e-19	2.2942102826213772e-18	M1	1.9502656	hypothetical protein
TGME49_230598	3.7919598	1.9229437	0.00012496095027859322	0.00025707034829707676	M1	1.9229437	hypothetical protein
TGME49_235440	3.720487	1.8954915	1.8869469136319078e-12	1.5820028141967513e-11	M1	1.8954915	hypothetical protein
TGME49_220720	3.6782105	1.879004	0.006682933560038247	0.009488822499308337	M1	1.879004	hypothetical protein
TGME49_208380	3.6779184	1.8788894	0.015646618850522497	0.02061256054649503	M1	1.8788894	hypothetical protein
TGME49_265100	3.6320724	1.860793	0.009260676724734553	0.012748326926328669	M1	1.860793	hypothetical protein
TGME49_240580	3.6192098	1.8556747	4.292910730892162e-09	2.1763280495962607e-08	M1	1.8556747	hypothetical protein
TGME49_224170	3.6072404	1.8508956	3.101468505982739e-28	8.064772413556962e-27	M1	1.8508956	SAG-related sequence SRS60A
TGME49_319090	3.569191	1.835597	0.0001638799296477825	0.00032873232505421546	M1	1.835597	IgA-specific serine endopeptidase
TGME49_207150	3.5610318	1.8322953	6.477866841119505e-11	4.40067947542612e-10	M1	1.8322953	SAG-related sequence SRS49C
TGME49_223430	3.5196006	1.8154117	5.144415665635077e-16	6.029883049969769e-15	M1	1.8154117	hypothetical protein
TGME49_260400	3.4655192	1.7930715	0.00020711301517594335	0.0004064821391667202	M1	1.7930715	hypothetical protein
TGME49_230602	3.3654833	1.7508137	7.657256792961161e-05	0.00016592686450593531	M1	1.7508137	hypothetical protein
TGME49_226820	3.2959068	1.7206755	0.0005471254016691916	0.0009818978062234739	M1	1.7206755	hypothetical protein
TGME49_240930	3.2513742	1.7010496	0.005141042839263161	0.007453586041278603	M1	1.7010496	MoaC family protein
TGME49_253340	3.2314947	1.6922016	1.5726357068043377e-06	4.89876312502892e-06	M1	1.6922016	hypothetical protein
TGME49_263270	3.2280324	1.690655	5.649879385524245e-56	3.9136992366447046e-54	M1	1.690655	glycerophosphodiester phosphodiesterase family protein
TGME49_222370	3.2179785	1.6861547	3.823774226212451e-37	1.4362095993653965e-35	M1	1.6861547	SAG-related sequence SRS13
TGME49_208740	3.2005436	1.678317	8.777084158334363e-94	2.0604205061689917e-91	M1	1.678317	microneme protein putative
TGME49_200300	3.1822667	1.6700548	6.02241821055062e-05	0.0001334787733998513	M1	1.6700548	hypothetical protein
TGME49_280580	3.1701338	1.6645437	3.305445630267293e-46	1.7137620258520794e-44	M1	1.6645437	SAG-related sequence SRS35B
TGME49_251857	3.1506393	1.6556447	2.0734396942294276e-05	5.070208002295397e-05	M1	1.6556447	hypothetical protein
TGME49_207020	3.1379158	1.6498067	0.03371704926869038	0.041524742548776215	M1	1.6498067	hypothetical protein
TGME49_216140	3.1303697	1.646333	1.2850840939382235e-60	1.0969945129163563e-58	M1	1.646333	tetratricopeptide repeat-containing protein
TGME49_267470	3.0611522	1.6140748	8.585736989305584e-05	0.0001838775045530195	M1	1.6140748	cold-shock DNA-binding domain-containing protein
TGME49_309865	3.0611303	1.6140645	0.0010132423202327998	0.0017047403639831556	M1	1.6140645	hypothetical protein
TGME49_225290	3.0606833	1.6138537	9.967723608315583e-15	1.0335856713358895e-13	M1	1.6138537	GDA1/CD39 (nucleoside phosphatase) family protein
TGME49_232270	3.0562265	1.6117516	3.0377071327109827e-06	8.932380994620916e-06	M1	1.6117516	histidine acid phosphatase superfamily protein
TGME49_212920	3.0210676	1.5950584	2.479257868023838e-05	5.9675899295555274e-05	M1	1.5950584	hypothetical protein
TGME49_318750	2.9825277	1.5765356	3.202341450032364e-15	3.478533109797366e-14	M1	1.5765356	deoxyribose-phosphate aldolase
TGME49_297340	2.9791205	1.5748866	5.1762270230963975e-51	3.0590415784746615e-49	M1	1.5748866	hypothetical protein
TGME49_284420	2.9685624	1.5697644	1.3922936653872775e-11	1.0412631651493702e-10	M1	1.5697644	hypothetical protein
TGME49_209410	2.9485555	1.5600083	0.0022310236765607397	0.0034863870359864665	M1	1.5600083	hypothetical protein
TGME49_202020	2.912648	1.5423313	6.7802663807999865e-47	3.5812519490087924e-45	M1	1.5423313	DnAK-TPR
TGME49_280570	2.8808782	1.5265087	6.26974339510718e-130	5.8872890480056426e-127	M1	1.5265087	SAG-related sequence SRS35A
TGME49_309860	2.8720615	1.5220866	0.0003983095997843931	0.0007364065691922787	M1	1.5220866	hypothetical protein
TGME49_213067	2.8494205	1.5106685	1.1879892513118908e-14	1.2184098498588336e-13	M1	1.5106685	hypothetical protein
TGME49_321390	2.8330035	1.5023324	0.00017098977166901701	0.0003414542912038901	M1	1.5023324	hypothetical protein
TGME49_311100	2.8261173	1.4988213	4.226970135139766e-34	1.4008676318457318e-32	M1	1.4988213	zinc finger (CCCH type) motif-containing protein
TGME49_261970	2.803286	1.487119	2.3321308231951983e-11	1.696113389571654e-10	M1	1.487119	hypothetical protein
TGME49_272630	2.7898753	1.4802006	0.014277543849456677	0.018980576226483935	M1	1.4802006	U6 snRNA-associated Sm family protein LSm8 putative
TGME49_300130	2.781127	1.4756696	3.832685382408779e-08	1.641663667852843e-07	M1	1.4756696	apical membrane antigen 1 domain-containing protein
TGME49_208730	2.7670372	1.4683421	4.863816941816887e-57	3.513172391050813e-55	M1	1.4683421	microneme protein putative
TGME49_252640	2.7640831	1.466801	2.999763574709956e-15	3.262677216199979e-14	M1	1.466801	P-type ATPase PMA1
TGME49_242100	2.7436936	1.4561193	7.379387873552092e-22	1.34693751445764e-20	M1	1.4561193	hypothetical protein
TGME49_251540	2.738759	1.4535223	1.7612351667724035e-49	9.922798929595721e-48	M1	1.4535223	dense granule protein GRA9
TGME49_243390	2.7259512	1.4467597	0.0035430558945290457	0.005303288233203147	M1	1.4467597	hypothetical protein
TGME49_320190	2.7085657	1.4375291	6.28547502801259e-39	2.5537764164295383e-37	M1	1.4375291	SAG-related sequence SRS16B
TGME49_203875	2.6962063	1.4309309	1.4684036401367196e-14	1.496921491290159e-13	M1	1.4309309	hypothetical protein
TGME49_315270	2.691656	1.4284941	5.038923675519373e-27	1.2132177772596644e-25	M1	1.4284941	hypothetical protein
TGME49_291040	2.690705	1.4279842	1.0539797914838972e-34	3.620806186109925e-33	M1	1.4279842	lactate dehydrogenase LDH2
TGME49_272590	2.687637	1.4263383	1.5964521892284056e-05	4.001072790975461e-05	M1	1.4263383	hypothetical protein
TGME49_244590	2.680358	1.4224257	6.260959613743638e-05	0.00013822196890216168	M1	1.4224257	katanin-like family protein
TGME49_222260	2.6772408	1.4207469	0.028218564115274406	0.035340113417039715	M1	1.4207469	hypothetical protein
TGME49_318180	2.665161	1.4142226	0.0110815149780615	0.015048992942246143	M1	1.4142226	hypothetical protein
TGME49_262100	2.6586988	1.4107203	9.424978382882342e-10	5.317122317339031e-09	M1	1.4107203	tetratricopeptide repeat-containing protein
TGME49_258130	2.646826	1.4042634	2.7409796312174534e-05	6.552763469142489e-05	M1	1.4042634	Rab1 protein
TGME49_275790	2.6313612	1.3958093	0.0018396680933910972	0.002929533645609226	M1	1.3958093	EGF family domain-containing protein
TGME49_293780	2.5948486	1.3756504	1.8714035267185562e-46	9.823124971613987e-45	M1	1.3756504	hypothetical protein
TGME49_236010	2.586147	1.3708043	4.303391354676331e-25	9.621153528669225e-24	M1	1.3708043	prenylcysteine oxidase
TGME49_297245	2.5588315	1.3554852	5.064761553364936e-14	4.914156129447425e-13	M1	1.3554852	transporter major facilitator family protein
TGME49_278005	2.551882	1.3515617	0.032248811754369604	0.03984425557546455	M1	1.3515617	hypothetical protein
TGME49_227380	2.5395737	1.3445864	2.763736570902878e-50	1.61078191453105e-48	M1	1.3445864	hypothetical protein
TGME49_254020	2.5388224	1.3441595	5.105197265526252e-06	1.4234253411732878e-05	M1	1.3441595	dynein intermediate chain putative
TGME49_284660	2.5387282	1.344106	0.0030296562496470057	0.004596701071053293	M1	1.344106	mitochondrial ribosomal protein s6-2 putative
TGME49_322100	2.5280452	1.3380222	2.5284244260648446e-20	4.2396259572765877e-19	M1	1.3380222	myosin-light-chain kinase
TGME49_225098	2.5273213	1.337609	0.004987936932822004	0.007249020639600818	M1	1.337609	hypothetical protein
TGME49_315520	2.5228393	1.3350483	2.1753238750657976e-06	6.574986433541151e-06	M1	1.3350483	calcium binding egf domain-containing protein
TGME49_250220	2.5127954	1.3292933	0.01875352943103637	0.024307680555473676	M1	1.3292933	hypothetical protein
TGME49_284310	2.5119815	1.3288258	0.020641674011784756	0.026507033440752618	M1	1.3288258	hypothetical protein
TGME49_267130	2.4732702	1.3064198	0.0001441912571416471	0.0002926417661152881	M1	1.3064198	SAG-related sequence SRS38A
TGME49_313640	2.4650097	1.3015933	2.238717974175049e-19	3.471450568762081e-18	M1	1.3015933	hypothetical protein
TGME49_207360	2.4636211	1.3007804	0.00237732763293289	0.003693160997411002	M1	1.3007804	hypothetical protein
TGME49_306920	2.4583282	1.2976775	0.01886297847012355	0.024434554115728715	M1	1.2976775	hypothetical protein
TGME49_265060	2.4567206	1.2967339	0.009821019796684064	0.01344959298359699	M1	1.2967339	hypothetical protein
TGME49_209040	2.4311855	1.28166	0.003693824614840137	0.005514310514045928	M1	1.28166	hypothetical protein
TGME49_254930	2.4246001	1.2777468	1.0569876418251764e-13	9.991725459803765e-13	M1	1.2777468	hypothetical protein
TGME49_311390	2.4240894	1.2774429	0.006260999048243444	0.008922715507032941	M1	1.2774429	tRNA (guanine(9)-N(1))-methyltransferase
TGME49_251930	2.3936372	1.2592045	7.257583428777445e-05	0.00015811765289146218	M1	1.2592045	enoyl-acyl carrier reductase ENR
TGME49_315640	2.3890066	1.2564108	0.00017025561821830846	0.0003402294229280976	M1	1.2564108	lipoyl(octanoyl) transferase
TGME49_240940	2.3887653	1.2562652	0.00026697637836946633	0.0005121946364586515	M1	1.2562652	hypothetical protein
TGME49_240470	2.3788953	1.2502918	2.8759922356945765e-05	6.846481798268976e-05	M1	1.2502918	hypothetical protein
TGME49_318738	2.377868	1.2496686	0.001375956338331367	0.0022426628766129956	M1	1.2496686	hypothetical protein
TGME49_225102	2.3699262	1.2448422	0.0005859468814125674	0.0010451323543304364	M1	1.2448422	hypothetical protein
TGME49_225540	2.362371	1.2402356	3.0237792502075873e-18	4.280395049163203e-17	M1	1.2402356	hypothetical protein
TGME49_285220	2.3464322	1.2304688	0.00039833260162982874	0.0007362880175795457	M1	1.2304688	CAP-Gly domain-containing protein
TGME49_320655	2.3428895	1.2282889	0.02566916138287827	0.03246970256648769	M1	1.2282889	tRNA-Tyr
TGME49_314720	2.336384	1.2242775	0.0023864187790701495	0.0037038797248708597	M1	1.2242775	Sedlin N-terminal region protein putative
TGME49_242110	2.3324358	1.2218374	4.1591817025830005e-11	2.90489624533297e-10	M1	1.2218374	rhoptry kinase family protein ROP38
TGME49_278245	2.3298082	1.2202113	0.0005179624946070184	0.0009343225276251681	M1	1.2202113	hypothetical protein
TGME49_223095	2.3256485	1.2176331	0.0027313380496093017	0.004185410309564499	M1	1.2176331	hypothetical protein
TGME49_250720	2.3057432	1.2052319	0.015110929472094095	0.01998786429310803	M1	1.2052319	hypothetical protein
TGME49_226720	2.2897367	1.1951817	9.785075512759333e-10	5.505570782844815e-09	M1	1.1951817	translin family protein
TGME49_310680	2.2745535	1.1855834	0.0005826993880217269	0.0010397788277389387	M1	1.1855834	aminotransferase class I/II superfamily protein
TGME49_209720	2.265829	1.180039	0.0018952688803504619	0.0030095673257876277	M1	1.180039	hypothetical protein
TGME49_293480	2.2406073	1.1638898	5.107413131191018e-07	1.762464204642519e-06	M1	1.1638898	MoeA N-terminal region (domain I and II) domain-containing protein
TGME49_223530	2.2341142	1.1597029	0.0029073884000235676	0.0044334787745577715	M1	1.1597029	hypothetical protein
TGME49_268790	2.223784	1.1530167	2.7379813250396725e-16	3.291419655463766e-15	M1	1.1530167	hypothetical protein
TGME49_204330	2.2214196	1.1514819	2.9183677474629473e-07	1.05488134447431e-06	M1	1.1514819	hypothetical protein
TGME49_305455	2.2198713	1.150476	9.103699798162311e-05	0.00019349941396949117	M1	1.150476	hypothetical protein
TGME49_235500	2.2069645	1.1420634	0.009205289946192581	0.01268241039049128	M1	1.1420634	hypothetical protein
TGME49_269315	2.1924932	1.1325724	7.062999785857678e-05	0.00015427606924343045	M1	1.1325724	hypothetical protein
TGME49_209700	2.1914554	1.1318893	0.0012809801021096314	0.002102459281982617	M1	1.1318893	hypothetical protein
TGME49_234520	2.1906972	1.1313901	2.30957038807344e-06	6.953394852015904e-06	M1	1.1313901	U2 snRNP auxilliary factor large subunit splicing factor subfamily protein
TGME49_214290	2.1867309	1.1287757	4.232363491593762e-09	2.1495014343424806e-08	M1	1.1287757	DJ-1 family protein
TGME49_263240	2.1844952	1.1272999	7.811411553848319e-05	0.00016866182688189102	M1	1.1272999	hypothetical protein
TGME49_269190	2.1571436	1.1091223	2.8295301413381123e-11	2.01962493449733e-10	M1	1.1091223	glyceraldehyde-3-phosphate dehydrogenase GAPDH2
TGME49_204370	2.154926	1.1076384	3.6272631123139075e-05	8.444628254039899e-05	M1	1.1076384	WD-40 repeat protein
TGME49_257755	2.1495507	1.1040351	0.0007430553583445859	0.0012939544268226037	M1	1.1040351	hypothetical protein
TGME49_278975	2.1399167	1.0975546	1.0850217171284202e-12	9.252793674522986e-12	M1	1.0975546	ICE family protease (caspase) p20 domain-containing protein
TGME49_238240	2.1290305	1.0901966	0.0034619820510622674	0.0051957397111573825	M1	1.0901966	bystin protein
TGME49_259280	2.1247709	1.0873072	0.029042998954834313	0.03631341680238272	M1	1.0873072	hypothetical protein
TGME49_255715	2.12091	1.0846833	0.03641687645336212	0.04460275694309612	M1	1.0846833	hypothetical protein
TGME49_207710	2.115399	1.0809298	7.696809775261943e-05	0.0001665703954180248	M1	1.0809298	phosphatidylinositol synthase putative
TGME49_300120	2.1130223	1.079308	1.0618371573466793e-06	3.418508882566395e-06	M1	1.079308	aminotransferase class V superfamily protein
TGME49_266470	2.1069353	1.075146	0.0005508863031932469	0.0009878082215756692	M1	1.075146	hypothetical protein
TGME49_233925	2.1013987	1.0713499	0.002561562764890263	0.00394816102974423	M1	1.0713499	hypothetical protein
TGME49_211910	2.0907285	1.0640057	0.0004395021714024069	0.0008056904231066683	M1	1.0640057	kinesin-related protein 3A putative
TGME49_225240	2.0854154	1.0603348	0.0001039534627641926	0.00021788460164191264	M1	1.0603348	50S ribosomal protein L13 putative
TGME49_259205	2.0817432	1.0577922	0.02800543543544748	0.0351096179891658	M1	1.0577922	hypothetical protein
TGME49_208430	2.0801365	1.0566782	0.0008229618887438466	0.0014158898456380798	M1	1.0566782	serine proteinase inhibitor PI-2 putative
TGME49_294830	2.072495	1.0513686	8.39872767163836e-10	4.792548788184725e-09	M1	1.0513686	methyltransferase domain-containing protein
TGME49_319550	2.0679173	1.0481786	5.956860215802925e-12	4.682923319418653e-11	M1	1.0481786	membrane protein C17G8.08c putative
TGME49_262560	2.062217	1.0441961	3.845097921112987e-11	2.692205677823186e-10	M1	1.0441961	hypothetical protein
TGME49_217740	2.0520768	1.0370847	0.015496097714245562	0.02044294751531209	M1	1.0370847	3-ketoacyl-(acyl-carrier-protein) reductase
TGME49_225350	2.050023	1.0356401	0.007386562554983403	0.010393579778915208	M1	1.0356401	hypothetical protein
TGME49_208300	2.0391147	1.0279429	0.032575254457841166	0.04020056592044621	M1	1.0279429	hypothetical protein
TGME49_232655	2.0380564	1.0271939	2.2641598121124107e-05	5.492082253777837e-05	M1	1.0271939	hypothetical protein
TGME49_260825	2.0369716	1.0264258	3.9955119325406366e-09	2.037783424375433e-08	M1	1.0264258	hypothetical protein
TGME49_253790	2.0279584	1.020028	5.390683665600006e-12	4.26161530944674e-11	M1	1.020028	zinc finger (CCCH type) motif-containing protein
TGME49_243950	2.0251124	1.018002	0.0011481750662336613	0.0019063315294185997	M1	1.018002	prohibitin putative
TGME49_226420	2.0224288	1.0160888	7.3075887188933904e-37	2.7205476768003546e-35	M1	1.0160888	peptidase family M3 protein
TGME49_310870	2.0186183	1.0133681	0.03167742338552507	0.0392128174939318	M1	1.0133681	integral membrane protein putative
TGME49_213780	2.013085	1.009408	0.019268057256688616	0.024913456529417916	M1	1.009408	radical SAM domain-containing protein
TGME49_262710	2.0111985	1.0080554	1.2449902251610737e-15	1.4066059348711542e-14	M1	1.0080554	Ctr copper transporter family protein
TGME49_286740	2.0097585	1.0070221	4.197797419003691e-07	1.4677528335953742e-06	M1	1.0070221	microneme-like protein
TGME49_216180	2.0054812	1.0039485	8.930049336843657e-14	8.498631412800197e-13	M1	1.0039485	hypothetical protein
TGME49_260520	1.990787	0.9933389	3.901779847985878e-09	1.9935877566704145e-08	M1	0.9933389	hypothetical protein
TGME49_311290	1.9906989	0.99327505	0.025994539258181622	0.0328468677139493	M1	0.99327505	protein tyrosine phosphatase family protein ptpla protein
TGME49_314310	1.9863138	0.9900936	0.0002736573050147274	0.0005232302906514617	M1	0.9900936	hypothetical protein
TGME49_202285	1.9817978	0.9868098	0.00921113478295506	0.012686326605403066	M1	0.9868098	EGF family domain-containing protein
TGME49_208560	1.980931	0.98617864	0.0033752579374577226	0.0050745961269267415	M1	0.98617864	carrier superfamily protein
TGME49_295720	1.9463849	0.960797	0.00046478716432339797	0.0008481788654063995	M1	0.960797	sulfite oxidase putative
TGME49_265870	1.9407729	0.9566313	0.0032441763166812	0.004891442293001396	M1	0.9566313	pantoate-beta-alanine ligase
TGME49_289360	1.9352247	0.95250106	4.455296084772718e-07	1.5545709005951379e-06	M1	0.95250106	hypothetical protein
TGME49_200295	1.9334267	0.9511601	3.920928627416644e-07	1.3800819587795942e-06	M1	0.9511601	hypothetical protein
TGME49_225953	1.9323701	0.9503714	0.01537103889671203	0.020287466768095168	M1	0.9503714	hypothetical protein
TGME49_214930	1.9138607	0.9364858	0.023524802576354347	0.029977096889742247	M1	0.9364858	hypothetical protein
TGME49_251940	1.9121709	0.9352115	0.04117981462011803	0.049944117875232126	M1	0.9352115	leucine rich repeat-containing protein
TGME49_247510	1.9102786	0.93378305	1.6864017997805826e-11	1.2490606143685978e-10	M1	0.93378305	fructose-bisphospatase II
TGME49_263570	1.9089198	0.9327565	3.587243300887231e-07	1.2716356181123317e-06	M1	0.9327565	hypothetical protein
TGME49_253420	1.9078202	0.93192524	0.012597455494796243	0.016914695962269313	M1	0.93192524	PQ loop repeat-containing protein
TGME49_202890	1.9004796	0.9263635	0.013932980463376285	0.018557544191645858	M1	0.9263635	hypothetical protein
TGME49_284530	1.8999256	0.9259429	2.789515964976187e-09	1.4507199643085388e-08	M1	0.9259429	hypothetical protein
TGME49_306650	1.8993357	0.92549497	0.017231873054723856	0.022494062277644625	M1	0.92549497	hypothetical protein
TGME49_224310	1.8970351	0.9237464	0.006806692496970707	0.009641863609101483	M1	0.9237464	DHHC zinc finger domain-containing protein
TGME49_310650	1.8943126	0.92167443	0.017521988226413696	0.022833974171383522	M1	0.92167443	hypothetical protein
TGME49_223040	1.8932413	0.92085826	0.002599555115190734	0.004001610251088687	M1	0.92085826	hypothetical protein
TGME49_270240	1.8899925	0.9183805	9.272383974487329e-45	4.664340295737644e-43	M1	0.9183805	MAG1
TGME49_290970	1.886212	0.9154918	1.096145064120795e-28	2.903925372064212e-27	M1	0.9154918	8-amino-7-oxononanoate synthase
TGME49_286630	1.885577	0.91500604	8.56169739469728e-07	2.8109908579093517e-06	M1	0.91500604	redoxin domain-containing protein
TGME49_235150	1.8754008	0.9071989	0.0008516301606854798	0.0014604558620034476	M1	0.9071989	transporter major facilitator family protein
TGME49_239790	1.8711416	0.9039187	0.015080071585921118	0.01995641794121819	M1	0.9039187	BRCA1 C Terminus (BRCT) domain-containing protein
TGME49_232160	1.8700558	0.9030813	0.01205994858722148	0.016254964196269334	M1	0.9030813	zinc finger C3HC4 type (RING finger) domain-containing protein
TGME49_231430	1.866011	0.89995754	0.035109561032339004	0.04309526511028278	M1	0.89995754	oligosaccharyl transferase stt3 protein putative
TGME49_273060	1.8655105	0.89957047	0.0018547075748188214	0.0029512584663516964	M1	0.89957047	ribosomal protein S17 putative
TGME49_246770	1.8602848	0.8955235	0.029349698217844073	0.036669766357037295	M1	0.8955235	hypothetical protein
TGME49_305460	1.8569179	0.89291	1.602415097323335e-23	3.29489294099258e-22	M1	0.89291	methionine aminopeptidase 2 putative
TGME49_241130	1.8558449	0.89207613	5.524168248707287e-07	1.8923691070054836e-06	M1	0.89207613	hypothetical protein
TGME49_230122	1.8546774	0.8911683	0.012839057755347065	0.017206291958521733	M1	0.8911683	hypothetical protein
TGME49_247780	1.854191	0.8907898	3.248749263212066e-05	7.620088821372514e-05	M1	0.8907898	hypothetical protein
TGME49_283780	1.850927	0.88824797	2.3243135726140877e-13	2.1098575727348716e-12	M1	0.88824797	glucose-6-phosphate isomerase GPI
TGME49_290000	1.8488641	0.8866392	1.0835576672036218e-05	2.80378011192217e-05	M1	0.8866392	hypothetical protein
TGME49_285530	1.8425947	0.8817388	0.0023897322420166887	0.0037083413840034956	M1	0.8817388	ribosomal protein RPL35
TGME49_310060	1.8397174	0.8794842	0.025130823254505264	0.03183162280033333	M1	0.8794842	small nuclease
TGME49_256760	1.8347592	0.87559074	4.806651175989561e-26	1.125235708816836e-24	M1	0.87559074	pyruvate kinase PyK1
TGME49_230130	1.8337651	0.8748089	0.02052044745123161	0.026387446958362495	M1	0.8748089	hypothetical protein
TGME49_297720	1.8324591	0.87378097	0.0010446473438840318	0.001750260646939721	M1	0.87378097	trehalose-phosphatase
TGME49_265310	1.825758	0.8684955	2.0365767930815318e-05	4.988727674878848e-05	M1	0.8684955	heat shock protein 40 putative
TGME49_286790	1.8244374	0.86745167	0.014569629039632269	0.01934453024570814	M1	0.86745167	nuclear factor NF2
TGME49_214320	1.8222432	0.8657155	9.239247790589827e-10	5.2262973947974984e-09	M1	0.8657155	facilitative glucose transporter GT1
TGME49_213570	1.8167939	0.86139476	2.126397619316885e-07	7.926857644837669e-07	M1	0.86139476	hypothetical protein
TGME49_253680	1.813201	0.8585388	2.0221565818180414e-05	4.9562776313643466e-05	M1	0.8585388	hypothetical protein
TGME49_226560	1.8104248	0.85632825	8.39098709337635e-05	0.00018011742932721244	M1	0.85632825	zinc finger (CCCH type) motif-containing protein
TGME49_316700	1.8063068	0.85304296	3.3295723280418547e-10	2.0228767609116978e-09	M1	0.85304296	uridine kinase
TGME49_314295	1.8055577	0.8524445	0.0021515070924594416	0.003376487732288717	M1	0.8524445	ribosomal l25 family protein
TGME49_265150	1.8039832	0.8511859	0.0020381632480235595	0.003216529898981718	M1	0.8511859	hypothetical protein
TGME49_257040	1.7984431	0.8467485	0.01097162791987782	0.014916542398791416	M1	0.8467485	TB2/DP1 HVA22 family protein
TGME49_204340	1.7972842	0.8458186	9.058330948290588e-14	8.611018542632594e-13	M1	0.8458186	hypothetical protein
TGME49_225730	1.7962087	0.844955	6.503468033439531e-12	5.079557148853741e-11	M1	0.844955	membrane protein putative
TGME49_310830	1.7919649	0.84154236	9.793971677875487e-05	0.0002063546613057236	M1	0.84154236	enoyl-CoA hydratase/isomerase family protein
TGME49_245470	1.7864156	0.8370677	0.015118188790036693	0.019994337005414725	M1	0.8370677	mitotic checkpoint protein BUB3 family protein
TGME49_203290	1.786238	0.8369243	2.6955409682449932e-46	1.4061738717678048e-44	M1	0.8369243	hypothetical protein
TGME49_256090	1.7799065	0.8318015	0.01208097683788621	0.016280710453990807	M1	0.8318015	glycerophosphodiester phosphodiesterase family protein
TGME49_260030	1.7779231	0.8301929	0.014184142023207922	0.018865310707921017	M1	0.8301929	atypical MEK-related kinase (incomplete catalytic triad)
TGME49_248990	1.7686943	0.8226847	1.1264015045224021e-23	2.3388744753608896e-22	M1	0.8226847	hypothetical protein
TGME49_310740	1.7661562	0.8206129	4.4972424807897183e-07	1.5666197941118678e-06	M1	0.8206129	hypothetical protein
TGME49_301240	1.7652186	0.81984687	0.002340759741599546	0.003641038206563181	M1	0.81984687	hypothetical protein
TGME49_294390	1.7628376	0.8178996	5.906587057874713e-05	0.0001311178545471479	M1	0.8178996	myosin light chain MLC4 putative
TGME49_211710	1.7609267	0.81633484	0.0009977979167028203	0.0016837839844360092	M1	0.81633484	TB2/DP1 HVA22 family protein
TGME49_313080	1.7575527	0.813568	0.007537544672100779	0.010588395948125611	M1	0.813568	hypothetical protein
TGME49_267120	1.7542802	0.81087923	0.01649418679886308	0.021617923796090555	M1	0.81087923	hypothetical protein
TGME49_229990	1.7522222	0.80918574	4.121851275390426e-06	1.1748318761660874e-05	M1	0.80918574	T-complex protein 1 subunit alpha putative
TGME49_268210	1.7517686	0.8088122	0.0295757728833913	0.03692493080773229	M1	0.8088122	AGC kinase
TGME49_205500	1.7485137	0.8061291	0.0016107280754195815	0.0025883747794962697	M1	0.8061291	hypothetical protein
TGME49_208390	1.7461133	0.8041472	0.0024529843206385353	0.0037981257775222175	M1	0.8041472	hypothetical protein
TGME49_260180	1.7459282	0.8039942	0.017162647249861482	0.022414083126036065	M1	0.8039942	hypothetical protein
TGME49_245710	1.744944	0.8031807	0.027526712100025455	0.03459156043974946	M1	0.8031807	phosphatidylinositol-4-phosphate 5-kinase putative
TGME49_275320	1.7433809	0.8018878	2.4746004037471996e-09	1.3013595527111128e-08	M1	0.8018878	penicillin amidase
TGME49_208440	1.7382308	0.7976197	0.030935593845334952	0.03841268051526971	M1	0.7976197	hypothetical protein
TGME49_250880	1.730215	0.79095125	0.00855213949430154	0.011867673377067702	M1	0.79095125	kinase pfkB family protein
TGME49_244408	1.7279994	0.78910273	0.006206924851833912	0.008862091894382225	M1	0.78910273	hypothetical protein
TGME49_318660	1.7269276	0.78820765	1.934054628779032e-10	1.2179355937266468e-09	M1	0.78820765	PP2C putative
TGME49_201840	1.7231342	0.785035	2.1688480006677773e-05	5.27907098319222e-05	M1	0.785035	aspartyl protease ASP1
TGME49_227970	1.7170014	0.77989125	0.002182496670401748	0.003419406629878601	M1	0.77989125	histone family DNA-binding protein
TGME49_214220	1.7169033	0.7798088	5.527873182644363e-25	1.2261432090952102e-23	M1	0.7798088	hypothetical protein
TGME49_246760	1.713983	0.77735287	5.712171690520824e-05	0.00012727013698020427	M1	0.77735287	hypothetical protein
TGME49_268720	1.7119449	0.7756363	0.04014170431767612	0.048776066597941176	M1	0.7756363	Hrf1 family protein
TGME49_257440	1.708907	0.7730739	0.0003834250831749571	0.0007120029395542874	M1	0.7730739	SCO1/SenC protein
TGME49_214380	1.7067952	0.77128994	0.0018304857231338588	0.002917110097341927	M1	0.77128994	hypothetical protein
TGME49_258826	1.7060688	0.7706758	0.027909065256362407	0.035014772933717145	M1	0.7706758	hypothetical protein
TGME49_218540	1.6995813	0.76517934	0.012821970132710423	0.01719157061582354	M1	0.76517934	peptidase S15 putative
TGME49_263215	1.6990547	0.7647323	0.031007884561719296	0.038485479869450695	M1	0.7647323	hypothetical protein
TGME49_254010	1.6921185	0.7588306	0.0004316539926982908	0.0007926788118846709	M1	0.7588306	serine carboxypeptidase s28 protein
TGME49_224180	1.6914922	0.75829655	0.00022082583831960483	0.0004305950991322059	M1	0.75829655	hypothetical protein
TGME49_248370	1.6891618	0.7563075	0.01189254595918187	0.01606520234991144	M1	0.7563075	prefoldin subunit 6 putative
TGME49_310180	1.6869771	0.7544404	1.526645237018308e-06	4.764283197208907e-06	M1	0.7544404	hypothetical protein
TGME49_248390	1.6867268	0.7542263	9.550507976449576e-11	6.335270244032604e-10	M1	0.7542263	ribosomal protein RPL26
TGME49_256000	1.6849058	0.7526679	0.008583420019172215	0.011905216245203411	M1	0.7526679	endoplasmic reticulum retention receptor
TGME49_268610	1.6846002	0.75240624	0.0032712005878672433	0.004928671094324491	M1	0.75240624	hypothetical protein
TGME49_214385	1.6807264	0.7490849	0.0011977595328834354	0.0019797116785444774	M1	0.7490849	hypothetical protein
TGME49_209485	1.6727262	0.74220127	1.5586124071080422e-05	3.9120384474220566e-05	M1	0.74220127	hypothetical protein
TGME49_224140	1.6683168	0.7383933	0.002840050998700799	0.004340193669081456	M1	0.7383933	hypothetical protein
TGME49_306280	1.6581302	0.7295573	0.018347693115997727	0.023825500080408235	M1	0.7295573	mediator complex subunit MED7
TGME49_292920	1.6518365	0.7240709	0.00015252720012808173	0.0003078594144452875	M1	0.7240709	heat shock protein 75 putative
TGME49_229250	1.649792	0.7222841	6.116800642401115e-12	4.795276644613342e-11	M1	0.7222841	ribosomal protein RPL28
TGME49_202510	1.6473663	0.7201614	0.014789021793751526	0.01961733215805904	M1	0.7201614	multi-pass transmembrane protein
TGME49_218420	1.6459048	0.7188809	0.03845025113180495	0.046902868405728	M1	0.7188809	WD domain G-beta repeat-containing protein
TGME49_226430	1.6404247	0.71406937	1.434605354924484e-07	5.488388345163791e-07	M1	0.71406937	reticulon protein
TGME49_224150	1.6394243	0.7131893	0.0009143650634094712	0.0015576091817926711	M1	0.7131893	hypothetical protein
TGME49_321590	1.6383353	0.7122307	0.008791390592707117	0.012163726571540249	M1	0.7122307	hypothetical protein
TGME49_211030	1.6372912	0.7113109	0.014866393051644328	0.01969832042637915	M1	0.7113109	hypothetical protein
TGME49_232630	1.6313435	0.7060606	1.641202160333032e-06	5.080512621602364e-06	M1	0.7060606	hypothetical protein
TGME49_266260	1.6288469	0.703851	0.03441309268148168	0.04232029194575112	M1	0.703851	hypothetical protein
TGME49_257530	1.6250632	0.70049584	9.953569202720236e-17	1.2480358061155596e-15	M1	0.70049584	transporter major facilitator family protein
TGME49_260530	1.6229528	0.69862103	0.00040910609348889047	0.0007543869945613382	M1	0.69862103	Sel1 repeat-containing protein
TGME49_309120	1.6209997	0.6968838	1.1619209233492839e-11	8.806631141905649e-11	M1	0.6968838	ribosomal protein RPL4
TGME49_228470	1.6105504	0.6875538	3.9490990656079895e-17	5.118686534271951e-16	M1	0.6875538	ribosomal protein RPL15
TGME49_240480	1.6056387	0.6831473	0.00511541642556055	0.007420251323792002	M1	0.6831473	cpw-wpc domain-containing protein
TGME49_301180	1.6053	0.68284285	0.03986759936435115	0.04849180803513696	M1	0.68284285	SAG-related sequence SRS19F
TGME49_271080	1.6046368	0.6822468	0.023288875956217852	0.029689891492834075	M1	0.6822468	hypothetical protein
TGME49_263080	1.6030555	0.6808244	0.002841767049861215	0.004341246084305337	M1	0.6808244	hypothetical protein
TGME49_280750	1.6008714	0.67885745	8.069834835131365e-05	0.00017384189189827978	M1	0.67885745	rudimentary enhancer putative
TGME49_279360	1.6005433	0.6785617	5.183382065191031e-06	1.4423695038830887e-05	M1	0.6785617	hypothetical protein
TGME49_260260	1.5997516	0.67784786	9.48208815935049e-17	1.1906853942744575e-15	M1	0.67784786	ribosomal protein RPP1
TGME49_214330	1.5965507	0.67495835	0.031233360726635906	0.038742570306883904	M1	0.67495835	DnaJ domain-containing protein
TGME49_218920	1.5961847	0.67462766	0.0007744551386411119	0.001342547769570469	M1	0.67462766	proteasome subunit beta type putative
TGME49_316380	1.5931638	0.67189467	0.000806048139496352	0.001389619099731471	M1	0.67189467	hypothetical protein
TGME49_249720	1.5911343	0.6700556	3.010578994072131e-08	1.3134952544606906e-07	M1	0.6700556	ATP synthase F0 subunit 9 putative
TGME49_267045	1.584415	0.6639502	0.006712703937899494	0.009526290676605983	M1	0.6639502	Ras family protein
TGME49_306334	1.5807166	0.6605787	0.0012357893215665422	0.0020373889107606026	M1	0.6605787	hypothetical protein
TGME49_294180	1.579966	0.6598935	8.391115648832545e-05	0.00018007444984328045	M1	0.6598935	tRNA -methyltransferase family protein
TGME49_208420	1.5795418	0.6595061	2.414356146506885e-09	1.2736406862752611e-08	M1	0.6595061	Sodium:neurotransmitter symporter family protein
TGME49_257090	1.5791421	0.65914094	8.797763331101617e-15	9.224553090712131e-14	M1	0.65914094	NAC domain-containing protein
TGME49_310670	1.5757031	0.6559957	6.145166214752898e-06	1.6855825926931756e-05	M1	0.6559957	glycogen phosphorylase 1 putative
TGME49_316450	1.5739201	0.6543623	5.43188377852096e-05	0.000121828157675904	M1	0.6543623	longevity-assurance protein (LAG1) domain-containing protein
TGME49_289740	1.5677898	0.6487322	0.0039841641946106445	0.005910158260251809	M1	0.6487322	hypothetical protein
TGME49_315130	1.5630791	0.6443908	2.00305003278936e-05	4.9151497755815566e-05	M1	0.6443908	L-isoaspartyl protein carboxyl methyltransferase family protein
TGME49_240950	1.5626783	0.64402086	0.004525431257927133	0.0066338975820888465	M1	0.64402086	hypothetical protein
TGME49_238250	1.5622997	0.6436713	1.5575636129309092e-19	2.437587054236873e-18	M1	0.6436713	ribosomal protein RPL36
TGME49_243600	1.562131	0.64351547	8.42373299398186e-06	2.2407607029317187e-05	M1	0.64351547	acetyltransferase GNAT family protein
TGME49_254440	1.5583721	0.6400398	2.5763941206400984e-22	4.881862491822751e-21	M1	0.6400398	ribosomal protein RPL12
TGME49_224960	1.5542505	0.636219	0.004705248784017595	0.006877215059448755	M1	0.636219	hypothetical protein
TGME49_250760	1.554199	0.6361712	0.008766979600126039	0.012133924762637594	M1	0.6361712	pentatricopeptide repeat domain-containing protein
TGME49_266680	1.5530349	0.63509023	0.003295841211307196	0.004963142208973113	M1	0.63509023	hypothetical protein
TGME49_234450	1.5388082	0.6218135	2.841532508779936e-20	4.727124258208511e-19	M1	0.6218135	ribosomal protein RPS15A
TGME49_266850	1.5380311	0.6210847	0.000542572317443391	0.0009743473554428595	M1	0.6210847	3-demethylubiquinone-9 3-O-methyltransferase
TGME49_222840	1.5330523	0.6164069	0.0013504790286821698	0.0022049648901454823	M1	0.6164069	Ser/Thr phosphatase family protein
TGME49_309810	1.5264465	0.610177	6.828253286186414e-22	1.2490382796874758e-20	M1	0.610177	ribosomal protein RPP2
TGME49_263050	1.5228102	0.6067362	1.000129566371737e-11	7.628244553616921e-11	M1	0.6067362	ribosomal protein RPL13
TGME49_310770	1.5226355	0.6065706	0.029191287649981874	0.0364826341215612	M1	0.6065706	hypothetical protein
TGME49_270520	1.5223483	0.60629845	2.049883702755809e-09	1.0929695376649427e-08	M1	0.60629845	hypothetical protein
TGME49_273760	1.521521	0.6055142	1.500469284596358e-29	4.077320232837242e-28	M1	0.6055142	heat shock protein HSP70
TGME49_215210	1.5147431	0.5990731	0.008133040455782491	0.011336355746630023	M1	0.5990731	hypothetical protein
TGME49_300360	1.513123	0.5975293	0.0005175634064483124	0.0009338019530091135	M1	0.5975293	ADP/ATP translocase
TGME49_257960	1.5129975	0.5974096	0.03361584559699237	0.04141217363559512	M1	0.5974096	GDP-D-mannose pyrophosphorylase
TGME49_203720	1.5050769	0.5898372	2.0068421275350136e-06	6.107246244075765e-06	M1	0.5898372	vitamin k epoxide reductase family protein
TGME49_225810	1.5017602	0.5866545	0.03665548784501799	0.04488199475199174	M1	0.5866545	BIR protein
TGME49_248340	1.4951586	0.5802985	3.014885582072388e-06	8.880724313033723e-06	M1	0.5802985	GTP-binding nuclear protein ran/tc4
TGME49_276920	1.4908878	0.57617164	7.903040907486844e-06	2.1108912360673615e-05	M1	0.57617164	protein phosphatase 2C domain-containing protein
TGME49_201690	1.4845675	0.5700427	3.200997007390061e-05	7.520607647888075e-05	M1	0.5700427	BT1 family protein
TGME49_291850	1.4841849	0.5696708	6.461315473263932e-20	1.0521113114557513e-18	M1	0.5696708	ribosomal protein RPS30
TGME49_270140	1.4840891	0.5695777	0.014175315790407626	0.018856539232604257	M1	0.5695777	splicing factor DIM1 putative
TGME49_225555	1.4817412	0.56729347	0.027525939179629595	0.034595733493017505	M1	0.56729347	hypothetical protein
TGME49_215490	1.4811647	0.56673205	1.986604718846717e-08	8.944484005846353e-08	M1	0.56673205	transporter major facilitator family protein
TGME49_274140	1.47479	0.5605095	4.8957439480250544e-05	0.00011092206998595104	M1	0.5605095	hypothetical protein
TGME49_263530	1.472364	0.5581343	0.0040385703339659625	0.0059761789340476885	M1	0.5581343	chaperonin putative
TGME49_306960	1.4689467	0.55478203	0.0006642055210351517	0.001168929791392767	M1	0.55478203	phenylalanine--tRNA ligase beta subunit protein
TGME49_239760	1.4679133	0.5537667	4.877539532466322e-22	8.980411021540935e-21	M1	0.5537667	ribosomal protein RPL22
TGME49_295990	1.4644772	0.5503857	0.013393189654938404	0.017889338671389986	M1	0.5503857	ubiquitin conjugating enzyme E2 putative
TGME49_255900	1.4636813	0.54960155	0.0012549144449195025	0.00206408757765954	M1	0.54960155	Bax inhibitor-1 putative
TGME49_297060	1.4630443	0.54897344	0.00016537349664295673	0.00033117806164209183	M1	0.54897344	phosphoglycerate mutase PGMII
TGME49_209850	1.4595158	0.54548985	1.4216524568781339e-05	3.597121231460212e-05	M1	0.54548985	RNA recognition motif-containing protein
TGME49_217820	1.458838	0.54481965	0.010887050473587453	0.014813470222554753	M1	0.54481965	PCI domain-containing protein
TGME49_295935	1.4547474	0.54076874	0.0014035383699852037	0.0022832151616448424	M1	0.54076874	KRUF family protein
TGME49_207840	1.4547175	0.54073906	1.941173924078229e-22	3.7539727305229094e-21	M1	0.54073906	ribosomal protein RPS17
TGME49_201890	1.4543998	0.5404239	0.0012094729564202148	0.001997509469358459	M1	0.5404239	MORN repeat-containing protein
TGME49_237560	1.4522706	0.53831035	3.894724362848864e-05	9.007749203731733e-05	M1	0.53831035	iron-sulfur cluster protein ISCU
TGME49_271892	1.4502842	0.5363357	0.02057336407704801	0.026439400823469093	M1	0.5363357	hypothetical protein
TGME49_262630	1.4479781	0.53403986	0.00023757023395155655	0.0004603774471737226	M1	0.53403986	hypothetical protein
TGME49_314810	1.4423724	0.5284437	1.5794951324240843e-13	1.4620277507246372e-12	M1	0.5284437	ribosomal protein RPL7
TGME49_312090	1.4390925	0.52515936	3.1885593733249166e-10	1.938598220429415e-09	M1	0.52515936	ribosomal protein RPL23
TGME49_249425	1.438407	0.5244719	0.0009150932721702269	0.0015585355185631978	M1	0.5244719	hypothetical protein
TGME49_225080	1.4350857	0.5211369	1.223018628917623e-37	4.6980592877194695e-36	M1	0.5211369	ribosomal protein RPS18
TGME49_312860	1.4328539	0.5188916	0.0002606330787410065	0.0005009347619832264	M1	0.5188916	hypothetical protein
TGME49_269970	1.4325311	0.5185665	0.00199852247605787	0.0031592804798288555	M1	0.5185665	hypothetical protein
TGME49_231080	1.4319036	0.5179343	7.903675252466951e-20	1.2674375627817496e-18	M1	0.5179343	ribosomal protein RPL38
TGME49_203880	1.4310869	0.5171113	5.226697881725503e-05	0.00011760070233882382	M1	0.5171113	hypothetical protein
TGME49_209640	1.4292208	0.5152288	0.01609130194404452	0.02113577754571343	M1	0.5152288	hypothetical protein
TGME49_243720	1.428265	0.51426363	0.0026920358079548473	0.0041281790261343525	M1	0.51426363	peroxisomal biogenesis factor PEX11
TGME49_291840	1.4260412	0.5120157	4.3240002302129453e-19	6.537052941955205e-18	M1	0.5120157	hypothetical protein
TGME49_294670	1.4257042	0.51167476	0.000435467874949581	0.0007988146323418513	M1	0.51167476	translation initiation factor 3 subunit
TGME49_231140	1.4125705	0.4983228	1.3816135686262036e-17	1.862203551588524e-16	M1	0.4983228	ribosomal protein RPS25
TGME49_314730	1.411376	0.49710238	0.0076550077556434325	0.01073199577686507	M1	0.49710238	ALG6 ALG8 glycosyltransferase family protein
TGME49_274060	1.393813	0.47903705	0.02294337821032513	0.02928477409084091	M1	0.47903705	2-oxoglutarate/malate translocase OMT
TGME49_232300	1.3921365	0.4773006	2.0894638135203624e-32	6.468153365589957e-31	M1	0.4773006	ribosomal protein RPS3
TGME49_237070	1.3919863	0.47714496	0.011322159373416126	0.01535851827684425	M1	0.47714496	hypothetical protein
TGME49_263040	1.3905501	0.47565576	7.125262669538923e-05	0.00015547532873811886	M1	0.47565576	ribosomal protein RPS16
TGME49_232290	1.3856838	0.47059807	1.1000989505434624e-29	3.0184857892996106e-28	M1	0.47059807	hypothetical protein
TGME49_237160	1.3852335	0.4701292	0.0016965885163595532	0.0027196262427455586	M1	0.4701292	hypothetical protein
TGME49_321680	1.3848722	0.46975285	0.013039292425363901	0.017452496085959824	M1	0.46975285	hypothetical protein
TGME49_254620	1.3784215	0.46301717	1.9407380006860065e-29	5.239992601852218e-28	M1	0.46301717	ribosomal protein RPL39
TGME49_217570	1.3741174	0.45850524	4.0934434351779936e-06	1.1675224593550195e-05	M1	0.45850524	ribosomal protein RPS27
TGME49_257760	1.3734015	0.45775345	0.0006005046540168279	0.00106659622343342	M1	0.45775345	hypothetical protein
TGME49_294280	1.3645407	0.44841543	0.01495117264087553	0.01979823879474132	M1	0.44841543	E3 ubiquitin-protein ligase putative
TGME49_300190	1.3624898	0.44624543	2.0325475995064212e-11	1.4949573336317464e-10	M1	0.44624543	ribosomal protein RPL37A
TGME49_321520	1.3577875	0.4412577	0.00032932768020794734	0.0006199929216835293	M1	0.4412577	hypothetical protein
TGME49_244020	1.3467127	0.4294421	0.027429688290644468	0.03449014964205273	M1	0.4294421	activator of hsp90 atpase 1 family protein
TGME49_267060	1.3461561	0.42884573	2.1531769895210594e-10	1.342915036047415e-09	M1	0.42884573	ribosomal protein RPL14
TGME49_321530	1.3432648	0.42574373	4.824104074446785e-09	2.4252530358804154e-08	M1	0.42574373	cathepsin CPL
TGME49_211675	1.3420613	0.42445055	0.0032705745078929825	0.004928606484701069	M1	0.42445055	hypothetical protein
TGME49_238010	1.3365957	0.41856307	1.4919288788635806e-09	8.123898811389253e-09	M1	0.41856307	ribosomal protein RPL23A
TGME49_202450	1.3363367	0.41828355	0.02917911206187637	0.036472811127779496	M1	0.41828355	hypothetical protein
TGME49_263400	1.3339912	0.4157491	0.03892352406993719	0.047425418384521224	M1	0.4157491	hypothetical protein
TGME49_241830	1.3196236	0.4001265	0.018198308107641045	0.02365696074721958	M1	0.4001265	peptidyl-prolyl cis-trans isomerase
TGME49_308060	1.3183782	0.3987643	0.003728450762235844	0.0055581473613785706	M1	0.3987643	hypothetical protein
TGME49_207390	1.316496	0.39670312	0.0049116031243936565	0.00714668698420296	M1	0.39670312	coatomer protein complex gamma sub-unit putative
TGME49_288630	1.314966	0.39502543	0.00012313144246847994	0.00025361535956644504	M1	0.39502543	nucleosome assembly protein (NAP) putative
TGME49_203330	1.3141834	0.39416656	0.01640377986428212	0.021519457254431572	M1	0.39416656	hypothetical protein
TGME49_223660	1.3053145	0.38439748	0.008822693945814898	0.012201045088542252	M1	0.38439748	50S ribosomal protein L4 putative
TGME49_262690	1.2970868	0.37527505	1.6994559715556906e-16	2.0875148859908635e-15	M1	0.37527505	ribosomal protein RPL27
TGME49_250810	1.2967192	0.3748661	1.7415618000622367e-06	5.369550810771967e-06	M1	0.3748661	ribosomal protein RPL35
TGME49_288910	1.2933284	0.37108865	0.0017029531438243967	0.002728793518858547	M1	0.37108865	DUF866 domain-containing protein
TGME49_317705	1.2781557	0.35406357	0.002682136203755047	0.004115985665141438	M1	0.35406357	enoyl-CoA hydratase/isomerase family protein
TGME49_247025	1.2680568	0.34261933	0.03097150816617448	0.038451625607806746	M1	0.34261933	hypothetical protein
TGME49_267400	1.2568489	0.32981125	8.542973033044038e-08	3.411940694813571e-07	M1	0.32981125	ribosomal protein RPL32
TGME49_267420	1.2282914	0.29665285	0.020327761636786318	0.02615160809750056	M1	0.29665285	mago nashi family protein 2 putative
TGME49_242330	1.1523056	0.20452338	6.958794797834763e-15	7.360297226095317e-14	M1	0.20452338	ribosomal protein RPS5
TGME49_234617	22.398363	4.4853215	0.00185207717847706	0.002948183129649583	M2	4.4853215	tRNA-Gln
TGME49_243320	9.600077	3.263046	0.003287703226602989	0.004951769732315427	M2	3.263046	tRNA-Thr
TGME49_313055	8.832614	3.1428404	4.073774211191508e-10	2.4399337958029363e-09	M2	3.1428404	hypothetical protein
TGME49_217855	8.649565	3.1126275	4.2836904086773715e-05	9.824007501691307e-05	M2	3.1126275	hypothetical protein
TGME49_269228	8.083164	3.0149202	0.011922462661478343	0.016097896141900218	M2	3.0149202	tRNA-Lys
TGME49_210970	6.9846787	2.8041937	0.003473053353422464	0.005210504862377639	M2	2.8041937	hypothetical protein
TGME49_275820	6.599382	2.722331	0.004920785053191006	0.007157582527455626	M2	2.722331	tRNA-Gln
TGME49_298090	6.580518	2.7182012	0.0009275047818198618	0.0015768141040353352	M2	2.7182012	Toxoplasma gondii family B protein
TGME49_321380	6.5346193	2.7081032	0.00716398757181054	0.0101106978906765	M2	2.7081032	tRNA-Val
TGME49_256700	6.4377613	2.6865592	0.0007209923173386797	0.0012609904954116685	M2	2.6865592	hypothetical protein
TGME49_222680	6.1501513	2.620622	0.02672656163657185	0.03368623003589392	M2	2.620622	tRNA-Leu
TGME49_268420	6.098358	2.6084208	0.023908035171729437	0.03040126470603152	M2	2.6084208	tRNA-Val
TGME49_329600	5.891683	2.5586798	5.8677738780377856e-06	1.6163154186211644e-05	M2	2.5586798	hypothetical protein
TGME49_329300	5.8700194	2.5533652	1.1208275442642384e-17	1.5204034633350045e-16	M2	2.5533652	hypothetical protein
TGME49_273940	5.8603916	2.550997	0.021839391152015723	0.027951642378568054	M2	2.550997	hypothetical protein
TGME49_254100	5.8572865	2.5502324	0.03998696162073891	0.04862299462688699	M2	2.5502324	tRNA-Ser
TGME49_220525	5.805166	2.5373373	0.00516383196819913	0.007482775027992258	M2	2.5373373	hypothetical protein
TGME49_329620	5.6475663	2.4976294	0.008546529495470804	0.011863784619944771	M2	2.4976294	hypothetical protein
TGME49_220145	5.619246	2.4903765	3.068342953712962e-06	9.006796214598208e-06	M2	2.4903765	hypothetical protein
TGME49_238500	5.5477953	2.4719145	3.0614085932175627e-06	8.989563593218076e-06	M2	2.4719145	SAG-related sequence SRS22F
TGME49_280070	5.4653316	2.450309	9.77803665487893e-06	2.5567508592321108e-05	M2	2.450309	hypothetical protein
TGME49_276870	5.232	2.3873625	0.005344266503747337	0.007717771056590695	M2	2.3873625	hypothetical protein
TGME49_233157	5.0885754	2.347262	0.0013538646123239404	0.0022096388255599887	M2	2.347262	hypothetical protein
TGME49_281040	4.9817214	2.3166444	0.00020924323031189804	0.00040990137676538024	M2	2.3166444	hypothetical protein
TGME49_283495	4.978066	2.3155854	0.0205340174712943	0.026400879605949813	M2	2.3155854	hypothetical protein
TGME49_201190	4.9716573	2.313727	0.000655241407147731	0.0011545965662646946	M2	2.313727	hypothetical protein
TGME49_307460	4.8869567	2.2889364	0.005924971519358862	0.00849252617199826	M2	2.2889364	Toxoplasma gondii family B protein
TGME49_238480	4.8471117	2.2771254	3.0228507619117523e-05	7.145765535361181e-05	M2	2.2771254	SAG-related sequence SRS22D
TGME49_281030	4.7863765	2.2589338	0.00014762408996633991	0.00029889103600995177	M2	2.2589338	hypothetical protein
TGME49_322300	4.7222114	2.2394626	0.000828265575875454	0.0014235656664070495	M2	2.2394626	hypothetical protein
TGME49_297290	4.676158	2.2253237	6.238874745393061e-06	1.707960170823348e-05	M2	2.2253237	hypothetical protein
TGME49_242900	4.616012	2.206647	1.6177920322380822e-05	4.0461558048073495e-05	M2	2.206647	Toxoplasma gondii family A protein
TGME49_253770	4.5641994	2.1903617	0.005657800270924655	0.008137180069704606	M2	2.1903617	hypothetical protein
TGME49_329500	4.5371614	2.1817899	9.455410014998705e-13	8.096015201292203e-12	M2	2.1817899	hypothetical protein
TGME49_236290	4.5322914	2.1802406	0.0062415834842724826	0.008901049953693342	M2	2.1802406	hypothetical protein
TGME49_297680	4.530879	2.179791	9.363781907749051e-05	0.0001986278135100081	M2	2.179791	calmodulin putative
TGME49_300790	4.5273604	2.1786702	4.681731278930437e-07	1.626194452866466e-06	M2	2.1786702	hypothetical protein
TGME49_293880	4.5090833	2.1728342	0.0010383452345236008	0.0017421194315979651	M2	2.1728342	tRNA-His
TGME49_252090	4.492546	2.1675334	0.0006052969799608205	0.0010735288095800406	M2	2.1675334	hypothetical protein
TGME49_200110	4.4795165	2.163343	0.005395923796777039	0.007781732424328116	M2	2.163343	hypothetical protein
TGME49_213430	4.4564476	2.155894	0.018114908774407672	0.023555792283815855	M2	2.155894	hypothetical protein
TGME49_287510	4.42943	2.147121	2.6051938623948936e-05	6.251133824843624e-05	M2	2.147121	aromatic amino acid hydrolase AAH1
TGME49_260290	4.4258833	2.1459653	0.0015454180552765765	0.0024938567854004864	M2	2.1459653	hypothetical protein
TGME49_214787	4.3533173	2.1221151	0.000660973438587903	0.0011637263603138266	M2	2.1221151	hypothetical protein
TGME49_312670	4.3131366	2.1087375	4.872604125180761e-12	3.881091183968201e-11	M2	2.1087375	hypothetical protein
TGME49_254250	4.29637	2.1031182	1.1131208626315958e-08	5.267068538689594e-08	M2	2.1031182	PRELI family protein
TGME49_254320	4.2548785	2.089118	0.0011417162564884018	0.0018978450203744068	M2	2.089118	hypothetical protein
TGME49_212710	4.20778	2.0730593	8.000653536628498e-07	2.645286503835972e-06	M2	2.0730593	phenylalanine-4-hydroxylase
TGME49_306940	4.1904936	2.06712	0.00017697316981474498	0.0003529856639377885	M2	2.06712	hypothetical protein
TGME49_243110	4.1834373	2.064689	0.0004402934903506103	0.0008067910422708169	M2	2.064689	hypothetical protein
TGME49_254510	4.1788793	2.063116	4.289471492105173e-06	1.216453811402041e-05	M2	2.063116	ankyrin repeat-containing protein
TGME49_221855	4.1640754	2.0579963	6.803499376881232e-05	0.00014918623049824413	M2	2.0579963	hypothetical protein
TGME49_307450	4.1577225	2.0557935	0.0007240891371073588	0.0012648361508256075	M2	2.0557935	hypothetical protein
TGME49_217875	4.1464963	2.0518928	0.000660029963737922	0.0011623074022815542	M2	2.0518928	hypothetical protein
TGME49_262090	4.1219068	2.0433118	3.145688261864349e-06	9.198689100697444e-06	M2	2.0433118	hypothetical protein
TGME49_321270	4.11655	2.0414357	0.009949448054239581	0.013616645426134203	M2	2.0414357	hypothetical protein
TGME49_252385	4.089306	2.031856	0.0010752833049010168	0.0017969585148741333	M2	2.031856	hypothetical protein
TGME49_285350	4.058819	2.02106	0.001748942399142769	0.002795595274287033	M2	2.02106	dynein light chain putative
TGME49_297065	4.047076	2.01688	8.512335910834055e-05	0.00018244420690453612	M2	2.01688	hypothetical protein
TGME49_205310	4.03578	2.0128474	0.002738393493694727	0.0041939404521953855	M2	2.0128474	tRNA-Leu
TGME49_201200	4.0133295	2.0047996	0.0010492715394361104	0.0017569633009262074	M2	2.0047996	zinc finger (CCCH type) motif-containing protein
TGME49_311270	3.9906986	1.9966413	8.276725107753665e-11	5.54691545484744e-10	M2	1.9966413	hypothetical protein
TGME49_244732	3.9694371	1.9889344	0.0009606790500774209	0.0016279724588338248	M2	1.9889344	hypothetical protein
TGME49_243302	3.9385185	1.977653	0.029945963529927424	0.03732645100168387	M2	1.977653	hypothetical protein
TGME49_255320	3.9057412	1.9655963	0.0008639114485184484	0.001478516737835036	M2	1.9655963	mRNA turnover 4 (MRT4) family protein
TGME49_215050	3.8757162	1.9544629	0.00045442942243776463	0.0008303530916803348	M2	1.9544629	hypothetical protein
TGME49_275795	3.8544157	1.9465121	8.295220647879751e-07	2.7362572090254403e-06	M2	1.9465121	hypothetical protein
TGME49_301415	3.8467405	1.9436365	0.0008478561634749324	0.0014545741854499906	M2	1.9436365	hypothetical protein
TGME49_328900	3.8366985	1.9398654	7.393805017510111e-19	1.0943090403323633e-17	M2	1.9398654	hypothetical protein
TGME49_201100	3.816374	1.9322026	3.3111379927252553e-15	3.5920959148294135e-14	M2	1.9322026	hypothetical protein
TGME49_281360	3.812923	1.9308974	5.275902000698244e-05	0.00011864461896727212	M2	1.9308974	hypothetical protein
TGME49_321710	3.8034203	1.9272974	0.00015268979182717202	0.00030804044658186457	M2	1.9272974	hypothetical protein
TGME49_203500	3.7998586	1.9259458	6.462327032031222e-05	0.00014225872817842108	M2	1.9259458	alanine dehydrogenase/pyridine nucleotide transhydrogenase domain-containing protein
TGME49_202205	3.7924063	1.9231136	4.332476069078721e-06	1.2282373451789423e-05	M2	1.9231136	hypothetical protein
TGME49_323500	3.7867174	1.9209478	0.0011754888237871417	0.00194594633689033	M2	1.9209478	hypothetical protein
TGME49_329000	3.7824922	1.919337	1.3922761369024491e-24	2.9939250974459535e-23	M2	1.919337	hypothetical protein
TGME49_264748	3.7797327	1.9182842	0.011335366097135464	0.01537149853769124	M2	1.9182842	hypothetical protein
TGME49_298030	3.7647367	1.9125489	1.4322013163550627e-10	9.267636542508909e-10	M2	1.9125489	Ubiquinol-cytochrome c chaperone putative
TGME49_283585	3.7376685	1.9021386	0.002662081799114405	0.004088922807036684	M2	1.9021386	hypothetical protein
TGME49_268240	3.7337892	1.9006405	8.637300368117647e-07	2.8325116573908513e-06	M2	1.9006405	hypothetical protein
TGME49_257700	3.7269042	1.8979777	3.073466682404434e-17	4.0207224354488964e-16	M2	1.8979777	hypothetical protein
TGME49_258575	3.7170014	1.8941393	0.005203948312205968	0.007531866276152189	M2	1.8941393	Dpy-30 motif protein
TGME49_212030	3.7131677	1.8926505	5.9074116818578374e-05	0.00013110172301307926	M2	1.8926505	hypothetical protein
TGME49_299100	3.6965938	1.8861965	4.442563783291975e-14	4.3353471746651823e-13	M2	1.8861965	hypothetical protein
TGME49_208200	3.6783395	1.8790547	4.65590816592201e-06	1.3093870186424928e-05	M2	1.8790547	PHD-finger domain-containing protein
TGME49_256965	3.671958	1.8765495	0.0013371212617352666	0.0021852662508073366	M2	1.8765495	hypothetical protein
TGME49_272383	3.6634645	1.8732086	3.821542541612566e-05	8.860317152035061e-05	M2	1.8732086	hypothetical protein
TGME49_314885	3.6538222	1.8694065	6.693647577853481e-06	1.8218362537983823e-05	M2	1.8694065	hypothetical protein
TGME49_288890	3.6505532	1.8681151	1.1174521653191704e-15	1.2692994958484287e-14	M2	1.8681151	hypothetical protein
TGME49_261550	3.6196506	1.8558505	0.004749137902996874	0.006931772783804246	M2	1.8558505	tRNA-Glu
TGME49_251860	3.6114092	1.852562	0.0063521506152789745	0.009043467798133864	M2	1.852562	hypothetical protein
TGME49_299020	3.6094437	1.8517765	7.620097070650809e-11	5.123105834850437e-10	M2	1.8517765	AP2 domain transcription factor AP2III-4
TGME49_254855	3.6068048	1.8507214	0.01567967210077321	0.020643232423061913	M2	1.8507214	hypothetical protein
TGME49_244900	3.6027346	1.8490924	0.0074261199957464455	0.010445762330901	M2	1.8490924	dynein light chain type 1 putative
TGME49_271570	3.6018355	1.8487322	3.372472085548264e-06	9.800812102808933e-06	M2	1.8487322	Toxoplasma gondii family D protein
TGME49_222935	3.5751996	1.8380238	0.00011727583023386293	0.00024261885956092428	M2	1.8380238	hypothetical protein
TGME49_202735	3.5620022	1.8326883	0.020004159543825308	0.025778461772623922	M2	1.8326883	hypothetical protein
TGME49_281500	3.5565374	1.8304733	0.0031326696260946577	0.004736838613370183	M2	1.8304733	hypothetical protein
TGME49_263540	3.5510976	1.8282651	1.3580610621352034e-08	6.319919623405619e-08	M2	1.8282651	hypothetical protein
TGME49_329200	3.5454113	1.825953	2.010616920023631e-24	4.28003113126441e-23	M2	1.825953	hypothetical protein
TGME49_307060	3.5448585	1.825728	7.730799693181318e-05	0.00016713478692012104	M2	1.825728	hypothetical protein
TGME49_243540	3.5316195	1.8203299	1.8723977881736148e-07	7.042115579819857e-07	M2	1.8203299	WD domain G-beta repeat-containing protein
TGME49_232770	3.5285273	1.8190662	0.0023474928916225454	0.0036501678798715976	M2	1.8190662	hypothetical protein
TGME49_233670	3.5213346	1.8161223	0.0024187321660304865	0.0037485247634556464	M2	1.8161223	hypothetical protein
TGME49_307080	3.5187495	1.8150628	0.028795186694845334	0.036019556358516565	M2	1.8150628	hypothetical protein
TGME49_263120	3.5113807	1.8120384	0.0008018681111562829	0.001384106905102481	M2	1.8120384	hypothetical protein
TGME49_293290	3.5062563	1.8099315	1.1687824626702074e-05	3.005897928188047e-05	M2	1.8099315	hypothetical protein
TGME49_258630	3.4643197	1.792572	4.308295306804109e-05	9.872397949512343e-05	M2	1.792572	hypothetical protein
TGME49_315380	3.4561152	1.7891513	9.79961770811316e-06	2.5616012759438393e-05	M2	1.7891513	SAG-related sequence SRS53B
TGME49_254920	3.439928	1.7823784	2.1704202042148248e-05	5.281376661623808e-05	M2	1.7823784	hypothetical protein
TGME49_286800	3.4380984	1.7816108	2.975586851552547e-06	8.783333734708548e-06	M2	1.7816108	hypothetical protein
TGME49_316120	3.4164002	1.7724769	0.00016467935038589948	0.00032986612707068893	M2	1.7724769	hypothetical protein
TGME49_307050	3.4036298	1.7670741	0.0005637474097246826	0.0010087294854082773	M2	1.7670741	hypothetical protein
TGME49_200595	3.396554	1.7640718	4.494812564315533e-06	1.2695742306494175e-05	M2	1.7640718	hypothetical protein
TGME49_247310	3.3940008	1.7629869	4.028477031196803e-06	1.1513242945770775e-05	M2	1.7629869	cpw-wpc domain-containing protein
TGME49_294410	3.3820584	1.7579015	1.7652514609298824e-08	8.042124041142014e-08	M2	1.7579015	hypothetical protein
TGME49_306950	3.3789244	1.756564	1.5347203856919442e-09	8.340785838895576e-09	M2	1.756564	RAP domain-containing protein
TGME49_203440	3.3695526	1.752557	3.1465011087998295e-05	7.406986314893415e-05	M2	1.752557	anaphase-promoting complex subunit APC10
TGME49_264210	3.367872	1.7518373	3.119630497632366e-06	9.1319699811192e-06	M2	1.7518373	hypothetical protein
TGME49_319720	3.3649693	1.7505933	0.001010180863628419	0.0017009441080939967	M2	1.7505933	hypothetical protein
TGME49_241710	3.3587961	1.7479442	1.9276564750713113e-05	4.749453315110103e-05	M2	1.7479442	hypothetical protein
TGME49_311450	3.358108	1.7476487	8.985076628455766e-08	3.5716313540489027e-07	M2	1.7476487	zinc finger c2h2 type domain-containing protein
TGME49_215110	3.3572187	1.7472665	0.01236403337592854	0.01663828758916753	M2	1.7472665	tRNA-Thr
TGME49_240325	3.3536544	1.745734	0.0008613497017575272	0.0014747298074458796	M2	1.745734	Toxoplasma gondii family E protein
TGME49_275798	3.3435576	1.741384	0.013069939055710527	0.017485207370557174	M2	1.741384	microneme protein putative
TGME49_301470	3.336833	1.7384795	2.1818436685309834e-06	6.5899788573107004e-06	M2	1.7384795	hypothetical protein
TGME49_225360	3.330612	1.7357873	1.347691823282599e-05	3.42227872552922e-05	M2	1.7357873	hypothetical protein
TGME49_268182	3.324477	1.7331274	9.378525355753486e-07	3.0495543586561264e-06	M2	1.7331274	hypothetical protein
TGME49_277572	3.3217359	1.7319374	0.0011576756815363084	0.0019205962278491054	M2	1.7319374	Toxoplasma gondii family D protein
TGME49_289850	3.3210473	1.7316383	0.0015535930044361574	0.00250465747433994	M2	1.7316383	hypothetical protein
TGME49_259620	3.3205707	1.7314312	1.4074441622987993e-06	4.420033673573821e-06	M2	1.7314312	hypothetical protein
TGME49_224780	3.3198833	1.7311325	9.965780548884353e-08	3.9172470427265893e-07	M2	1.7311325	SAG-related sequence SRS40B
TGME49_268340	3.3093114	1.726531	1.3250003501646393e-05	3.367692619320712e-05	M2	1.726531	glycosyltransferase family 28 C-terminal domain-containing protein
TGME49_283590	3.302795	1.7236874	3.3002531429622346e-07	1.1812977260132927e-06	M2	1.7236874	NLI interacting factor family phosphatase
TGME49_251580	3.2979288	1.7215602	0.0009421098582565707	0.0015990701771693672	M2	1.7215602	hypothetical protein
TGME49_238940	3.2901042	1.7181332	6.091001480283127e-05	0.0001347161829622421	M2	1.7181332	GDP mannose 4%2C6-dehydratase putative
TGME49_278900	3.2891383	1.7177097	0.0005916405303551746	0.001053065316350375	M2	1.7177097	protein kinase putative
TGME49_287440	3.2883298	1.717355	0.000235968413596563	0.00045769315200930777	M2	1.717355	hypothetical protein
TGME49_255310	3.2861052	1.7163787	1.834946739322788e-06	5.622601484415113e-06	M2	1.7163787	zinc finger (CCCH type) motif-containing protein
TGME49_212955	3.2854753	1.7161021	0.0016811124714287923	0.0026963525329369376	M2	1.7161021	hypothetical protein
TGME49_273340	3.283569	1.7152648	2.830085101226697e-05	6.74479672601997e-05	M2	1.7152648	hypothetical protein
TGME49_209705	3.2793674	1.7134175	7.978317518567783e-05	0.00017208974310723926	M2	1.7134175	hypothetical protein
TGME49_221190	3.2784107	1.7129966	6.246716984895149e-07	2.1091092784398285e-06	M2	1.7129966	mrna cleavage factor family protein putative
TGME49_253960	3.2740977	1.7110974	2.176762866379874e-07	8.089631918986945e-07	M2	1.7110974	oxidoreductase short chain dehydrogenase/reductase family protein
TGME49_268230	3.2720902	1.7102125	0.01675480459202552	0.021935686073928377	M2	1.7102125	hypothetical protein
TGME49_285740	3.2657397	1.7074099	0.02694685264075331	0.03394363566358715	M2	1.7074099	hypothetical protein
TGME49_266770	3.2656324	1.7073624	0.015089527562760207	0.01996580514058032	M2	1.7073624	cpw-wpc domain-containing protein
TGME49_221600	3.2631855	1.706281	2.602274227513622e-09	1.3625662637371511e-08	M2	1.706281	hypothetical protein
TGME49_253110	3.2617927	1.7056651	2.339967221908447e-05	5.66134067917214e-05	M2	1.7056651	kinesin motor domain-containing protein
TGME49_265255	3.260803	1.7052273	0.0016761076844227856	0.0026898568251152604	M2	1.7052273	hypothetical protein
TGME49_301360	3.2558458	1.7030324	0.003812668209625715	0.005676684115494523	M2	1.7030324	hypothetical protein
TGME49_316890	3.253577	1.7020267	0.008932399287957266	0.012334592546164518	M2	1.7020267	hypothetical protein
TGME49_260150	3.2491581	1.700066	2.467695199514483e-09	1.2985362472663074e-08	M2	1.700066	tetratricopeptide repeat-containing protein
TGME49_244930	3.2484734	1.6997619	0.001235001399029662	0.0020368846259171884	M2	1.6997619	hypothetical protein
TGME49_255720	3.2483163	1.6996921	0.023837860249234368	0.03033028560166812	M2	1.6996921	hypothetical protein
TGME49_287490	3.244609	1.6980447	0.00021402491675955726	0.00041829892958719205	M2	1.6980447	hypothetical protein
TGME49_256830	3.2427027	1.6971967	5.879761995141479e-13	5.159903283586775e-12	M2	1.6971967	SacI domain-containing protein
TGME49_243355	3.2415638	1.69669	0.016931915308606188	0.022150404995825216	M2	1.69669	hypothetical protein
TGME49_228330	3.2410388	1.6964563	7.430770622103374e-12	5.7454201763399457e-11	M2	1.6964563	NLI interacting factor family phosphatase
TGME49_230110	3.2391586	1.6956191	8.823793855931099e-05	0.00018830778251634778	M2	1.6956191	hypothetical protein
TGME49_245580	3.238712	1.6954203	3.628331272489879e-08	1.5644401828475493e-07	M2	1.6954203	hypothetical protein
TGME49_254360	3.2381332	1.6951623	0.0003748193723821069	0.000697094743838289	M2	1.6951623	hypothetical protein
TGME49_213960	3.2379446	1.6950784	3.0942423488797935e-06	9.070219247444721e-06	M2	1.6950784	hypothetical protein
TGME49_285770	3.2328935	1.692826	9.703011482766481e-06	2.539490555616585e-05	M2	1.692826	hypothetical protein
TGME49_267540	3.2308435	1.6919109	3.2197993739489734e-05	7.562680519522728e-05	M2	1.6919109	AGC kinase
TGME49_207010	3.2294633	1.6912944	0.00021764344027751958	0.0004251744599596204	M2	1.6912944	SAG-related sequence SRS48K
TGME49_272190	3.228932	1.691057	0.00019318523064754014	0.00038171811648406867	M2	1.691057	hypothetical protein
TGME49_236230	3.2230775	1.6884389	0.0002312288564056536	0.00044911860847717276	M2	1.6884389	hypothetical protein
TGME49_318632	3.2224996	1.6881802	0.014918735001249855	0.0197645758732658	M2	1.6881802	hypothetical protein
TGME49_261960	3.217155	1.6857854	0.0010589472103362681	0.0017717606166208278	M2	1.6857854	hypothetical protein
TGME49_213885	3.2122653	1.683591	0.004342546114333378	0.006383520127366737	M2	1.683591	hypothetical protein
TGME49_254040	3.2115061	1.6832501	0.005996973852086945	0.008588447046938955	M2	1.6832501	hypothetical protein
TGME49_269110	3.2094722	1.6823361	4.3208799851822095e-10	2.573344380181455e-09	M2	1.6823361	ornithine aminotransferase mitochondrial precursor putative
TGME49_234670	3.2070992	1.6812689	7.430386557525192e-11	5.007511706351308e-10	M2	1.6812689	actin-like family protein
TGME49_311000	3.2068887	1.6811743	0.006189536368877041	0.008838758339536984	M2	1.6811743	hypothetical protein
TGME49_242810	3.2028832	1.6793712	1.3817926655506057e-05	3.503609305901041e-05	M2	1.6793712	hypothetical protein
TGME49_252190	3.195003	1.6758173	0.00026740461062924476	0.0005127833819895048	M2	1.6758173	KRUF family protein
TGME49_273472	3.1894324	1.6732997	0.02664722318314045	0.033596252889858264	M2	1.6732997	hypothetical protein
TGME49_204325	3.1884084	1.6728364	4.9247664720826524e-08	2.0654690548670222e-07	M2	1.6728364	hypothetical protein
TGME49_240310	3.1846435	1.6711318	1.3069758586523114e-05	3.323879922200025e-05	M2	1.6711318	Toxoplasma gondii family E protein
TGME49_297280	3.179313	1.668715	6.425975132656984e-05	0.00014156912368635082	M2	1.668715	hypothetical protein
TGME49_203685	3.177934	1.6680892	2.1936727893750714e-07	8.145311398509986e-07	M2	1.6680892	hypothetical protein
TGME49_226280	3.177189	1.667751	0.000600523434608783	0.001066405451960249	M2	1.667751	ribosomal protein L28 putative
TGME49_234600	3.174499	1.6665289	0.00012207903193715253	0.0002518774167238467	M2	1.6665289	hypothetical protein
TGME49_238470	3.17418	1.666384	0.001538237300630152	0.0024836919043992006	M2	1.666384	SAG-related sequence SRS22C
TGME49_229620	3.1722405	1.6655022	0.00021103563239645182	0.000413125348478669	M2	1.6655022	hypothetical protein
TGME49_293050	3.1693542	1.6641889	0.012613835508961797	0.016933999028790492	M2	1.6641889	sybindin family protein
TGME49_278790	3.1659195	1.6626246	0.00016982682975892437	0.00033945282362645926	M2	1.6626246	Tctex2-related light chain
TGME49_320770	3.164819	1.662123	0.00822413575524078	0.011442570179048376	M2	1.662123	Toxoplasma gondii family B protein
TGME49_297480	3.156182	1.6581805	4.766663422261885e-09	2.3978019393770947e-08	M2	1.6581805	hypothetical protein
TGME49_214450	3.1560664	1.6581275	0.022505118770202504	0.028751437449279115	M2	1.6581275	tRNA-Ile
TGME49_295140	3.150411	1.65554	0.002964728718275272	0.0045079025545419794	M2	1.65554	1-phosphatidylinositol 4-kinase
TGME49_207610	3.145675	1.6533697	0.0005886671321419808	0.001049319960711217	M2	1.6533697	rhoptry kinase family protein ROP36 (incomplete catalytic triad)
TGME49_276980	3.1442628	1.6527218	0.0025462869267248323	0.003926048315590505	M2	1.6527218	hypothetical protein
TGME49_248210	3.1431456	1.652209	0.0016798438437824633	0.002694829218641913	M2	1.652209	hypothetical protein
TGME49_298590	3.142886	1.65209	2.714424651068061e-08	1.1960168261822828e-07	M2	1.65209	hypothetical protein
TGME49_278290	3.1418562	1.6516172	3.365489487064239e-08	1.4585513669323016e-07	M2	1.6516172	Toxoplasma gondii family A protein
TGME49_310090	3.139372	1.650476	0.006795630989647833	0.0096278084649646	M2	1.650476	hypothetical protein
TGME49_277550	3.1390646	1.6503347	3.690604665708312e-11	2.590473424410377e-10	M2	1.6503347	UvrD/REP helicase domain-containing protein
TGME49_226810	3.1365588	1.6491826	2.110890979581083e-22	4.0360044498732424e-21	M2	1.6491826	histone lysine methyltransferase SET1
TGME49_310690	3.1242476	1.6435088	2.9608604875186694e-06	8.74903216084625e-06	M2	1.6435088	hypothetical protein
TGME49_229700	3.122644	1.6427681	8.967998535793582e-05	0.00019085508845628697	M2	1.6427681	hypothetical protein
TGME49_201215	3.111747	1.6377248	0.025208901802349356	0.031916169158300284	M2	1.6377248	hypothetical protein
TGME49_204380	3.111484	1.6376028	6.426057112807535e-15	6.813878125512732e-14	M2	1.6376028	hypothetical protein
TGME49_263190	3.1112154	1.6374782	0.015326385942876613	0.02023485199238404	M2	1.6374782	adenylosuccinate lyase putative
TGME49_258100	3.1092396	1.6365618	0.027088245850570316	0.03409633090306371	M2	1.6365618	TPR repeat region protein
TGME49_281970	3.1049368	1.6345639	0.000489541199107939	0.0008891280192695449	M2	1.6345639	adenylate kinase superfamily protein
TGME49_314750	3.0950768	1.6299752	0.0015198801616673695	0.002457338290845789	M2	1.6299752	hypothetical protein
TGME49_267580	3.0942144	1.6295732	0.006275276484839616	0.008941554809202426	M2	1.6295732	cyclin2 related protein
TGME49_258080	3.0936635	1.6293162	6.45303790234624e-14	6.218315086970134e-13	M2	1.6293162	hypothetical protein
TGME49_246050	3.0880828	1.6267114	4.568058753279603e-06	1.288110261059924e-05	M2	1.6267114	hypothetical protein
TGME49_355190	3.0879877	1.626667	3.6149397226249877e-06	1.043369385106003e-05	M2	1.626667	tRNA-Thr
TGME49_216390	3.0870445	1.6262263	1.6300892343465926e-07	6.188627187539557e-07	M2	1.6262263	RNA methyltransferase TrmH family protein
TGME49_268330	3.0786219	1.6222847	3.526557423667637e-09	1.8117286800860302e-08	M2	1.6222847	hypothetical protein
TGME49_244360	3.0759552	1.6210345	0.013888615290432503	0.018504286271392886	M2	1.6210345	hypothetical protein
TGME49_259580	3.075877	1.6209978	9.507220096430323e-09	4.544429696545964e-08	M2	1.6209978	hypothetical protein
TGME49_219742	3.0748944	1.6205368	2.589092502779848e-07	9.451585633258097e-07	M2	1.6205368	hypothetical protein
TGME49_315705	3.0748448	1.6205137	9.301915340271194e-09	4.4563767880176794e-08	M2	1.6205137	hypothetical protein
TGME49_253460	3.0738108	1.6200284	0.0014302529217468495	0.002322203158824712	M2	1.6200284	hypothetical protein
TGME49_300340	3.0734208	1.6198453	2.735178471885266e-13	2.4721917931446397e-12	M2	1.6198453	CAF1 family ribonuclease
TGME49_263430	3.0730865	1.6196884	5.1419271095801005e-06	1.4317768040547424e-05	M2	1.6196884	3-hydroxyisobutyrate dehydrogenase
TGME49_315962	3.066584	1.6166325	6.003567836916093e-11	4.088328105542135e-10	M2	1.6166325	hypothetical protein
TGME49_259570	3.0591054	1.6131098	3.310688060849524e-08	1.4377505037121957e-07	M2	1.6131098	CMP/dCMP deaminase zinc-binding putative
TGME49_312105	3.0572867	1.6122519	0.002380524778944366	0.00369676863411592	M2	1.6122519	hypothetical protein
TGME49_260230	3.0571957	1.6122088	9.556901494236324e-06	2.5051294828719345e-05	M2	1.6122088	hypothetical protein
TGME49_309140	3.046234	1.6070267	4.600226712230067e-08	1.9418839133394754e-07	M2	1.6070267	transducin beta-like protein TBL1
TGME49_240660	3.04541	1.6066364	1.8469409110027794e-07	6.955658484351376e-07	M2	1.6066364	hypothetical protein
TGME49_233180	3.0453916	1.6066277	8.052666835127091e-05	0.0001735162861388553	M2	1.6066277	hypothetical protein
TGME49_213310	3.0419865	1.6050137	0.00016398800275887129	0.0003288710515698199	M2	1.6050137	hypothetical protein
TGME49_319360	3.0380619	1.6031512	2.748894546041261e-05	6.569826868946463e-05	M2	1.6031512	SAG-related sequence SRS17A
TGME49_244015	3.0275867	1.5981683	0.0020419890352159375	0.0032219658955582316	M2	1.5981683	hypothetical protein
TGME49_312500	3.0248888	1.5968821	6.440248412657977e-11	4.3786435507138025e-10	M2	1.5968821	hypothetical protein
TGME49_281555	3.0247772	1.5968288	0.00014378834745136913	0.00029196427782593	M2	1.5968288	hypothetical protein
TGME49_272490	3.0223505	1.595671	3.4783407065191235e-07	1.2387466207666714e-06	M2	1.595671	protoporphyrinogen oxidase
TGME49_225125	3.0176618	1.5934311	5.6439030631743764e-11	3.865204601854672e-10	M2	1.5934311	pre-rRNA processing protein
TGME49_254530	3.016126	1.5926967	2.2129266126284186e-09	1.1747137439273095e-08	M2	1.5926967	hypothetical protein
TGME49_275780	3.0143564	1.59185	0.004068786912468406	0.006017731571100892	M2	1.59185	hypothetical protein
TGME49_265820	3.0041242	1.5869445	0.004738434860965408	0.006917345484542868	M2	1.5869445	Las1 family protein
TGME49_215900	3.0040174	1.5868932	2.0894705449360886e-07	7.806417142022496e-07	M2	1.5868932	hypothetical protein
TGME49_262440	3.001698	1.5857788	0.0003549205024323103	0.0006632979137672389	M2	1.5857788	hypothetical protein
TGME49_211400	2.9995766	1.5847589	6.504806154212169e-10	3.785958457937124e-09	M2	1.5847589	DEAD/DEAH box helicase domain-containing protein
TGME49_313270	2.9978023	1.5839052	4.257498928413151e-10	2.540969169775391e-09	M2	1.5839052	hypothetical protein
TGME49_297643	2.9957988	1.5829407	0.00867484845610565	0.012020190900565478	M2	1.5829407	hypothetical protein
TGME49_235940	2.9947085	1.5824156	0.017036033981206674	0.022269377134598235	M2	1.5824156	hypothetical protein
TGME49_257610	2.992181	1.5811975	1.623580197153681e-08	7.456997959861826e-08	M2	1.5811975	hypothetical protein
TGME49_244715	2.9903555	1.580317	0.005190564717707708	0.007515069801156046	M2	1.580317	hypothetical protein
TGME49_238460	2.9888175	1.5795748	8.449818415532889e-07	2.7839928042755725e-06	M2	1.5795748	SAG-related sequence SRS22B
TGME49_289350	2.9878466	1.5791061	1.4897711274955284e-13	1.3850446422953477e-12	M2	1.5791061	ATP-binding cassette G family transporter ABCG84
TGME49_257980	2.9868724	1.5786357	0.0007406888721632186	0.0012900992701260017	M2	1.5786357	ribosome recycling factor protein
TGME49_274700	2.9866135	1.5785105	0.00035460763885987543	0.0006628598000453014	M2	1.5785105	hypothetical protein
TGME49_275830	2.9811456	1.5758668	1.7265360485784608e-13	1.5876992542477229e-12	M2	1.5758668	hypothetical protein
TGME49_259290	2.9810948	1.5758423	0.007485588490661464	0.010522406575944783	M2	1.5758423	SAG-related sequence SRS26C
TGME49_294025	2.9771254	1.57392	0.03166272252673086	0.03920036156949933	M2	1.57392	hypothetical protein
TGME49_267000	2.9765308	1.5736318	0.0022271304593877734	0.003480946830457938	M2	1.5736318	hypothetical protein
TGME49_241140	2.9761262	1.5734357	4.080236653415248e-09	2.07598314015727e-08	M2	1.5734357	DEAD/DEAH box helicase domain-containing protein
TGME49_237100	2.9750586	1.572918	9.054591338706105e-08	3.597571763206643e-07	M2	1.572918	RAP domain-containing protein
TGME49_202080	2.9727361	1.5717914	7.39492372053773e-12	5.728185184442196e-11	M2	1.5717914	hypothetical protein
TGME49_222010	2.972058	1.5714623	4.344063717669288e-05	9.940883422156284e-05	M2	1.5714623	HAD hydrolase family IIID protein
TGME49_211410	2.9685764	1.5697713	1.0956348322727805e-06	3.5166008232196234e-06	M2	1.5697713	translation initiation factor sui1 protein
TGME49_222385	2.9657457	1.5683949	0.02294550363366883	0.029283064211436925	M2	1.5683949	hypothetical protein
TGME49_268020	2.963363	1.5672354	8.416148825705642e-10	4.799249239273845e-09	M2	1.5672354	transporter major facilitator family protein
TGME49_267710	2.961639	1.5663958	2.694794969605192e-15	2.934756738161531e-14	M2	1.5663958	CPSF A subunit region protein
TGME49_271182	2.9609144	1.5660428	0.031032661184933006	0.038510575576192196	M2	1.5660428	hypothetical protein
TGME49_242720	2.9594162	1.5653126	7.563542835113194e-12	5.83739730589421e-11	M2	1.5653126	aspartyl protease ASP5
TGME49_319590	2.9578345	1.5645413	8.726001978012046e-13	7.48664393057663e-12	M2	1.5645413	hypothetical protein
TGME49_211450	2.9573839	1.5643215	5.568984046090094e-08	2.3149770867440917e-07	M2	1.5643215	hypothetical protein
TGME49_222300	2.9569507	1.5641102	1.542073708534335e-05	3.87282761094314e-05	M2	1.5641102	hypothetical protein
TGME49_220740	2.9496622	1.5605497	3.974023957961133e-09	2.0280480959377737e-08	M2	1.5605497	hypothetical protein
TGME49_275802	2.944424	1.5579854	4.158995994676106e-09	2.1147818983759186e-08	M2	1.5579854	SRP72 RNA-binding domain-containing protein
TGME49_262800	2.9426446	1.5571133	5.466175908326035e-06	1.5145787738119124e-05	M2	1.5571133	hypothetical protein
TGME49_231280	2.9424953	1.5570402	0.005763618379071199	0.00827950687090442	M2	1.5570402	WD domain G-beta repeat-containing protein
TGME49_316760	2.939902	1.555768	4.026329191588333e-09	2.0522622435532572e-08	M2	1.555768	hypothetical protein
TGME49_230905	2.938087	1.5548772	5.8692380397431574e-08	2.429036761697817e-07	M2	1.5548772	hydrolase alpha/beta fold family protein
TGME49_224750	2.9379451	1.5548074	0.0003924170096437426	0.0007272623132673835	M2	1.5548074	SAG-related sequence SRS40F
TGME49_262990	2.9371593	1.5544215	1.16733934170139e-06	3.7241165635026227e-06	M2	1.5544215	hypothetical protein
TGME49_264890	2.9339008	1.5528201	2.4871083216759147e-10	1.5353215797284993e-09	M2	1.5528201	hypothetical protein
TGME49_230580	2.9204183	1.546175	1.3781690793086967e-08	6.40291747621649e-08	M2	1.546175	hypothetical protein
TGME49_312240	2.919638	1.5457895	8.588471008172745e-08	3.428491662261118e-07	M2	1.5457895	hypothetical protein
TGME49_223915	2.9132164	1.5426128	0.03442211185259044	0.042325224394913694	M2	1.5426128	hypothetical protein
TGME49_243560	2.9118326	1.5419273	0.0012935159718364584	0.0021201519546140244	M2	1.5419273	hypothetical protein
TGME49_221570	2.9102795	1.5411577	0.0003253340552634761	0.0006128841063378593	M2	1.5411577	pre-rRNA-processing protein putative
TGME49_293040	2.9078171	1.5399365	0.0009633669740763453	0.001632200139919646	M2	1.5399365	hypothetical protein
TGME49_257500	2.9060411	1.5390551	0.0001325850863862274	0.0002712361571169227	M2	1.5390551	hypothetical protein
TGME49_220150	2.9042492	1.5381653	0.0002516012999137288	0.0004852310784050483	M2	1.5381653	50S ribosomal protein L16 putative
TGME49_232180	2.901881	1.5369884	5.6953093505230775e-08	2.3628404183245227e-07	M2	1.5369884	UBA/TS-N domain-containing protein
TGME49_217160	2.8974876	1.5348024	0.010136887211981586	0.013855221385808891	M2	1.5348024	Der1 family protein
TGME49_255160	2.8966935	1.534407	0.003934133933852216	0.005841069197994568	M2	1.534407	hypothetical protein
TGME49_272710	2.8958638	1.5339937	1.5844433278304874e-06	4.926464519313998e-06	M2	1.5339937	AP2 domain transcription factor AP2VIII-4
TGME49_230870	2.8946981	1.5334129	0.03320696883643668	0.04092636628798693	M2	1.5334129	hypothetical protein
TGME49_268190	2.8933532	1.5327425	0.00039313943433961124	0.000728441429424261	M2	1.5327425	hypothetical protein
TGME49_223060	2.8896973	1.5309184	8.182427409433606e-20	1.3096532961576403e-18	M2	1.5309184	MORN repeat-containing protein
TGME49_315720	2.8884914	1.5303162	4.148774892889531e-05	9.543085634134302e-05	M2	1.5303162	Smg-4/UPF3 family protein
TGME49_318460	2.8868587	1.5295005	8.491273937053964e-10	4.8290549153461e-09	M2	1.5295005	P-type ATPase of unknown pump specificity (type V) protein
TGME49_203490	2.8859444	1.5290434	2.1936774528267924e-09	1.165227413817676e-08	M2	1.5290434	GNL3L/Grn1 GTPase
TGME49_259140	2.8833835	1.5277628	1.7008248565064846e-05	4.233776395386245e-05	M2	1.5277628	hypothetical protein
TGME49_220730	2.8793426	1.5257394	9.931996308918823e-06	2.593797923568386e-05	M2	1.5257394	hypothetical protein
TGME49_254200	2.876575	1.5243521	5.376960512675248e-10	3.1710183735253677e-09	M2	1.5243521	anticodon binding domain-containing protein
TGME49_223030	2.8746874	1.5234051	1.0586898132226573e-05	2.7461594878897105e-05	M2	1.5234051	tetratricopeptide repeat-containing protein
TGME49_220440	2.874588	1.5233552	1.1562388901266416e-08	5.45582069260762e-08	M2	1.5233552	cyclin-dependent kinase regulatory subunit protein
TGME49_203682	2.8740754	1.5230979	0.0029515441220446864	0.004490278915463482	M2	1.5230979	hypothetical protein
TGME49_297660	2.8729045	1.52251	0.005254163663155808	0.007599338887100759	M2	1.52251	hypothetical protein
TGME49_228020	2.8723884	1.5222508	0.0024588794154479492	0.0038037689804046528	M2	1.5222508	hypothetical protein
TGME49_306400	2.8722205	1.5221665	0.00021126028525258501	0.0004134693540226021	M2	1.5221665	hypothetical protein
TGME49_203250	2.8716993	1.5219047	0.0005627200815247227	0.0010071044915216923	M2	1.5219047	hypothetical protein
TGME49_252395	2.8686814	1.5203878	5.177897378057886e-06	1.4413178768763897e-05	M2	1.5203878	hypothetical protein
TGME49_220350	2.866321	1.5192002	4.049766213364842e-12	3.259483263728217e-11	M2	1.5192002	tRNA ligases class II (D K and N) domain-containing protein
TGME49_206910	2.8662152	1.5191469	0.014691056107624426	0.0194935021456326	M2	1.5191469	hypothetical protein
TGME49_293368	2.8619196	1.5169832	0.02378239026857277	0.03026882231320911	M2	1.5169832	TIP49 C-terminus family protein
TGME49_254210	2.8608453	1.5164415	0.0012858765593944676	0.0021092668484943024	M2	1.5164415	RNA recognition motif-containing protein
TGME49_235580	2.8600624	1.5160466	0.0009292453791788623	0.00157913788446422	M2	1.5160466	hypothetical protein
TGME49_207955	2.85797	1.5149908	0.0010344675227982783	0.0017373380435548986	M2	1.5149908	hypothetical protein
TGME49_233405	2.8565075	1.5142523	1.7634219868661537e-07	6.664883368070601e-07	M2	1.5142523	hypothetical protein
TGME49_256880	2.8562331	1.5141138	3.803683824660999e-07	1.3427289892318339e-06	M2	1.5141138	protein kinase domain-containing protein
TGME49_281380	2.8558197	1.5139048	0.00392575967035753	0.005830684529734884	M2	1.5139048	hypothetical protein
TGME49_263135	2.8544314	1.5132034	1.234808869796607e-05	3.159361113730283e-05	M2	1.5132034	hypothetical protein
TGME49_312690	2.8543684	1.5131716	0.012318179190498548	0.016587146644184706	M2	1.5131716	hypothetical protein
TGME49_230140	2.8535187	1.512742	0.0001346755996461778	0.00027524631018376023	M2	1.512742	vacuolar sorting protein 9 (vps9) domain-containing protein
TGME49_246635	2.8518636	1.511905	4.1495311084264944e-05	9.539632044970703e-05	M2	1.511905	hypothetical protein
TGME49_216250	2.8494186	1.5106676	5.088546208010218e-10	3.0093284817280864e-09	M2	1.5106676	RecF/RecN/SMC N terminal domain-containing protein
TGME49_228680	2.8468142	1.5093484	4.6317827939477114e-07	1.610168506443937e-06	M2	1.5093484	mitochondrial carrier superfamily protein
TGME49_239130	2.845579	1.5087222	2.3475930007395206e-05	5.678164982612962e-05	M2	1.5087222	Tyrosine kinase-like (TKL) protein
TGME49_258650	2.8451667	1.5085132	7.325280209232357e-08	2.9691099783320216e-07	M2	1.5085132	protoheme ferro-lyase putative
TGME49_230535	2.8438127	1.5078264	7.01504959682882e-10	4.049466129972702e-09	M2	1.5078264	hypothetical protein
TGME49_269085	2.8429723	1.5074	0.02994424941668875	0.03732982030099375	M2	1.5074	hypothetical protein
TGME49_288730	2.842836	1.5073309	0.00028567339599267475	0.0005437445652103816	M2	1.5073309	hypothetical protein
TGME49_220080	2.842264	1.5070405	0.023278398195454745	0.02968101133822994	M2	1.5070405	Toxoplasma gondii family C protein
TGME49_202110	2.8422606	1.5070388	0.00010172223622601045	0.00021379125052126694	M2	1.5070388	hypothetical protein
TGME49_269280	2.842023	1.5069182	0.02439514343491902	0.030974062074594445	M2	1.5069182	hypothetical protein
TGME49_320640	2.8420084	1.5069108	9.497558802573672e-11	6.305095792659081e-10	M2	1.5069108	peptidylprolyl isomerase domain-containing protein
TGME49_255870	2.8410816	1.5064403	0.000771870729109889	0.0013386167723594647	M2	1.5064403	WD domain G-beta repeat-containing protein
TGME49_268985	2.8397787	1.5057786	3.27705388841136e-07	1.1744861073352165e-06	M2	1.5057786	hypothetical protein
TGME49_244120	2.8390455	1.5054059	1.0768121504239529e-10	7.098392732630909e-10	M2	1.5054059	hypothetical protein
TGME49_207875	2.8381505	1.5049511	1.000851857068068e-06	3.2369686353165874e-06	M2	1.5049511	GCC2 and GCC3 domain-containing protein
TGME49_242350	2.8372352	1.5044857	0.0015663610042601045	0.002523797301621	M2	1.5044857	tetratricopeptide repeat-containing protein
TGME49_231040	2.8357043	1.5037072	3.6293419650949413e-05	8.447140993395028e-05	M2	1.5037072	3' exoribonuclease family domain 1 domain-containing protein
TGME49_209560	2.834619	1.5031549	0.010940597866787331	0.014879142673353673	M2	1.5031549	hypothetical protein
TGME49_244230	2.8339815	1.5028304	0.0006661665349139687	0.0011718928781344609	M2	1.5028304	hypothetical protein
TGME49_252300	2.8281283	1.4998477	0.0012778204514674962	0.0020980883301635537	M2	1.4998477	hypothetical protein
TGME49_212075	2.8274994	1.4995267	2.3484008376491724e-05	5.678493699277012e-05	M2	1.4995267	hypothetical protein
TGME49_210783	2.8267417	1.49914	0.017207827079812034	0.022469614748376315	M2	1.49914	hypothetical protein
TGME49_228380	2.820883	1.4961469	9.916426261447798e-09	4.723997651380797e-08	M2	1.4961469	hypothetical protein
TGME49_306860	2.8199325	1.4956607	1.2483429156915583e-06	3.969054168739413e-06	M2	1.4956607	hypothetical protein
TGME49_215885	2.8163776	1.4938408	1.2315966172827823e-08	5.779135487316376e-08	M2	1.4938408	hypothetical protein
TGME49_256850	2.8151958	1.4932353	0.0004329743744464833	0.0007947581317218137	M2	1.4932353	hypothetical protein
TGME49_217800	2.814862	1.4930642	1.298273230513183e-05	3.3057267463292886e-05	M2	1.4930642	hypothetical protein
TGME49_257560	2.8132617	1.4922438	8.956155229502962e-08	3.561810251507272e-07	M2	1.4922438	WD domain G-beta repeat-containing protein
TGME49_296950	2.8126073	1.4919081	4.032732561046346e-11	2.8189100805130413e-10	M2	1.4919081	hypothetical protein
TGME49_242730	2.8123472	1.4917747	0.018059686932033563	0.02349121352356713	M2	1.4917747	guanylate kinase family protein
TGME49_262760	2.8120344	1.4916142	1.7476573994646441e-06	5.382453601631089e-06	M2	1.4916142	poly(ADP-ribose) glycohydrolase
TGME49_259960	2.810969	1.4910676	6.795558768844769e-05	0.00014905078420842757	M2	1.4910676	Nucleoside-diphosphatase
TGME49_315230	2.8093042	1.4902129	0.000520215132651313	0.0009377854279087555	M2	1.4902129	hypothetical protein
TGME49_203980	2.8077462	1.4894125	9.608767036375876e-11	6.36891688034608e-10	M2	1.4894125	hypothetical protein
TGME49_221440	2.8064547	1.4887488	2.150249736714518e-05	5.2398386750214504e-05	M2	1.4887488	RPGR putative
TGME49_228320	2.8061497	1.4885919	0.00240651273951021	0.0037316402131377584	M2	1.4885919	hypothetical protein
TGME49_259155	2.8051853	1.4880961	5.553637704856715e-05	0.0001242620922524334	M2	1.4880961	hypothetical protein
TGME49_242590	2.8031943	1.4870718	1.2846678566832095e-05	3.273056393376486e-05	M2	1.4870718	hypothetical protein
TGME49_258750	2.8030443	1.4869945	5.414803269800882e-05	0.00012147730935250133	M2	1.4869945	hypothetical protein
TGME49_221240	2.8015416	1.486221	0.00583284606812097	0.00837326008522003	M2	1.486221	hypothetical protein
TGME49_216990	2.8014045	1.4861503	0.00036236383921629903	0.0006763111318942013	M2	1.4861503	LysM domain-containing protein
TGME49_294210	2.7976527	1.4842169	3.706301876588721e-08	1.5939927307405233e-07	M2	1.4842169	hypothetical protein
TGME49_209130	2.7974272	1.4841006	5.895750659122207e-08	2.438814920227204e-07	M2	1.4841006	regulator of chromosome condensation (RCC1) repeat-containing protein
TGME49_235950	2.7957754	1.4832485	5.089471115419632e-09	2.548052156185504e-08	M2	1.4832485	subtilisin SUB8
TGME49_273885	2.7934642	1.4820553	3.677491133529764e-09	1.8881213590194433e-08	M2	1.4820553	hypothetical protein
TGME49_238020	2.7918074	1.4811994	0.01870769558935391	0.024255712707215386	M2	1.4811994	hypothetical protein
TGME49_223668	2.7903855	1.4804645	0.0009541819722381642	0.001617935763921494	M2	1.4804645	LYAR-type C2HC zinc finger protein
TGME49_244480	2.7871614	1.4787965	0.0012067685390896598	0.001993432549618201	M2	1.4787965	peptidase M16 inactive domain-containing protein
TGME49_206560	2.7866802	1.4785475	2.4269265965632715e-07	8.909624964186015e-07	M2	1.4785475	EF hand domain-containing protein
TGME49_297670	2.7858605	1.4781231	6.229714057571045e-07	2.1050505198133906e-06	M2	1.4781231	hypothetical protein
TGME49_213970	2.7855682	1.4779717	0.001646124972912634	0.002643245705127241	M2	1.4779717	ribosomal RNA small subunit methyltransferase B putative
TGME49_277060	2.7850318	1.4776938	5.670986851634431e-07	1.9379502581141357e-06	M2	1.4776938	hypothetical protein
TGME49_273140	2.783765	1.4770374	0.0003034061158738823	0.0005749069697870358	M2	1.4770374	radical SAM methylthiotransferase MiaB/RimO family protein
TGME49_272510	2.7836816	1.4769943	0.0027415453926851866	0.00419800690588558	M2	1.4769943	aspartyl protease
TGME49_257510	2.7813966	1.4758095	5.201839200619146e-07	1.790661632767104e-06	M2	1.4758095	CDP-alcohol phosphatidyltransferase superfamily protein
TGME49_273610	2.7790127	1.4745724	1.6744246970140949e-07	6.351240177049424e-07	M2	1.4745724	hypothetical protein
TGME49_231055	2.777728	1.4739053	0.012411955514841892	0.016694801218514854	M2	1.4739053	hypothetical protein
TGME49_315540	2.7773774	1.4737232	1.78934012202037e-06	5.504810109644757e-06	M2	1.4737232	calcium binding egf domain-containing protein
TGME49_315090	2.7757292	1.4728668	0.0025824079661836887	0.003978838600222125	M2	1.4728668	hypothetical protein
TGME49_202800	2.7749646	1.4724693	1.9976547473749163e-10	1.2561146034274863e-09	M2	1.4724693	cytochrome c oxidase assembly protein COX11 protein putative
TGME49_238930	2.7744806	1.4722177	2.4140669414728175e-13	2.1866323389482083e-12	M2	1.4722177	hypothetical protein
TGME49_260300	2.7736607	1.4717913	0.0023781977158028496	0.0036938336512129907	M2	1.4717913	metal cation transporter ZIP family protein
TGME49_270920	2.7735457	1.4717315	0.004322171630817996	0.006357993464237229	M2	1.4717315	rhoptry kinase family protein ROP32
TGME49_311170	2.7728584	1.4713739	0.001199503015097232	0.0019818181780228167	M2	1.4713739	hypothetical protein
TGME49_293370	2.7678697	1.468776	9.612579294074258e-07	3.11726429832009e-06	M2	1.468776	histone arginine methyltransferase PRMT2
TGME49_243298	2.7678683	1.4687753	2.563669047395655e-09	1.3440178113858983e-08	M2	1.4687753	ICE family protease (caspase) p20 domain-containing protein
TGME49_319980	2.7665725	1.4680997	0.002594826454089792	0.003995786873817936	M2	1.4680997	hypothetical protein
TGME49_283490	2.766521	1.4680729	5.87584719585318e-07	2.000676255123095e-06	M2	1.4680729	Alpha-amylase AMY3 putative
TGME49_278260	2.7660084	1.4678055	2.545385468660104e-08	1.1238794459585443e-07	M2	1.4678055	polynucleotide adenylyltransferase
TGME49_257790	2.7659261	1.4677626	1.1841117399689423e-06	3.7747749205875257e-06	M2	1.4677626	histone deacetylase HDAC4
TGME49_201210	2.7654045	1.4674904	0.00014668321045535482	0.0002971996671201639	M2	1.4674904	hypothetical protein
TGME49_228750	2.7645435	1.4670413	1.8355092723480946e-10	1.162810259416323e-09	M2	1.4670413	calcium dependent protein kinase CDPK7
TGME49_292180	2.7637875	1.4666467	0.01518737332004461	0.020070131654057386	M2	1.4666467	tRNA-Thr
TGME49_209680	2.7634907	1.4664917	3.8072451313596364e-09	1.9488206302313925e-08	M2	1.4664917	hypothetical protein
TGME49_246110	2.7593975	1.4643533	1.5354373620650347e-06	4.788184925022734e-06	M2	1.4643533	hypothetical protein
TGME49_306430	2.759109	1.4642024	6.635959769554212e-10	3.851682418441116e-09	M2	1.4642024	hypothetical protein
TGME49_293250	2.7578375	1.4635375	1.0750548691941366e-11	8.162882928625022e-11	M2	1.4635375	hypothetical protein
TGME49_317830	2.7553725	1.4622474	0.03810335955141522	0.04651328781872166	M2	1.4622474	hypothetical protein
TGME49_284590	2.7546904	1.4618902	8.950951234292385e-05	0.00019063631270414553	M2	1.4618902	mediator complex subunit MED10
TGME49_218000	2.753502	1.4612676	7.155346059416215e-08	2.9058063213900257e-07	M2	1.4612676	hypothetical protein
TGME49_226385	2.753155	1.4610858	0.012331078982732424	0.01660187167166986	M2	1.4610858	hypothetical protein
TGME49_313300	2.7527769	1.4608877	0.015561999385421273	0.020517075944804238	M2	1.4608877	YL1 nuclear protein C-terminal domain-containing protein
TGME49_289640	2.752553	1.4607704	0.016944940083670035	0.022164013101237497	M2	1.4607704	hypothetical protein
TGME49_266040	2.751633	1.460288	1.9740426760322314e-08	8.897405149412473e-08	M2	1.460288	regulator of chromosome condensation (RCC1) repeat-containing protein
TGME49_316470	2.7503748	1.4596282	1.2682795037113067e-10	8.263862826418082e-10	M2	1.4596282	hypothetical protein
TGME49_229680	2.7488403	1.4588231	0.01381290675758349	0.018409221732903026	M2	1.4588231	hypothetical protein
TGME49_205150	2.7481205	1.4584453	1.1573196213163144e-08	5.457872834678668e-08	M2	1.4584453	ACR YagE family COG1723 domain-containing protein
TGME49_227990	2.7464406	1.4575632	1.0051368316997961e-05	2.6209229758392402e-05	M2	1.4575632	hypothetical protein
TGME49_249620	2.7457545	1.4572027	5.063364631492518e-12	4.02544633120821e-11	M2	1.4572027	histone deacetylase HDAC2
TGME49_205160	2.7429194	1.4557122	9.608398973889917e-10	5.41337198188958e-09	M2	1.4557122	hypothetical protein
TGME49_301480	2.7425163	1.4555001	0.0008299934155585102	0.0014262452937952358	M2	1.4555001	hypothetical protein
TGME49_313495	2.7423067	1.45539	2.2649986024055995e-09	1.2008471260307228e-08	M2	1.45539	hypothetical protein
TGME49_268700	2.7394805	1.4539024	0.0009697922141312842	0.0016417696317354731	M2	1.4539024	hypothetical protein
TGME49_248160	2.7390444	1.4536726	1.8262502623769737e-06	5.600014864785125e-06	M2	1.4536726	hypothetical protein
TGME49_311250	2.73903	1.453665	1.3968586247886173e-06	4.391686100479392e-06	M2	1.453665	hypothetical protein
TGME49_239080	2.738602	1.4534396	8.782635651072922e-05	0.00018752413816881572	M2	1.4534396	carrier superfamily protein
TGME49_208050	2.7379968	1.4531208	3.7584009312550945e-10	2.2622682528516242e-09	M2	1.4531208	ABC transporter putative
TGME49_254700	2.7370954	1.4526457	0.0013033804821513497	0.0021359062351485473	M2	1.4526457	hypothetical protein
TGME49_289010	2.7354343	1.45177	1.1752325349059984e-08	5.530005652834406e-08	M2	1.45177	RNA recognition motif-containing protein
TGME49_244700	2.7345173	1.4512862	1.0965636734318866e-14	1.1287526923474877e-13	M2	1.4512862	NAD(+)/NADH kinase domain-containing protein
TGME49_320290	2.7343645	1.4512056	1.0056688970853162e-06	3.250060363008798e-06	M2	1.4512056	hypothetical protein
TGME49_256950	2.7339988	1.4510126	0.0060261754601033	0.008627343522502624	M2	1.4510126	hypothetical protein
TGME49_267090	2.73309	1.4505329	0.0031480284671353137	0.004754957743656932	M2	1.4505329	hypothetical protein
TGME49_228730	2.7317865	1.4498447	1.841920449477711e-08	8.337477085450529e-08	M2	1.4498447	hypothetical protein
TGME49_289040	2.731293	1.449584	6.668541669919467e-05	0.000146492970243019	M2	1.449584	Armadillo/beta-catenin family repeat-containing protein
TGME49_271580	2.7308342	1.4493418	0.015061355075693806	0.019934770829238585	M2	1.4493418	Toxoplasma gondii family D protein
TGME49_250910	2.7300143	1.4489086	0.00044081360060676985	0.0008075689873678326	M2	1.4489086	hypothetical protein
TGME49_263200	2.7298176	1.4488046	9.018287271866608e-05	0.00019182870811614572	M2	1.4488046	hypothetical protein
TGME49_232520	2.729438	1.448604	0.0367836688436984	0.045032418571359575	M2	1.448604	brix domain-containing protein
TGME49_204120	2.7292264	1.448492	0.0020255498558882433	0.0031984158879132182	M2	1.448492	hypothetical protein
TGME49_267312	2.7280686	1.4478799	2.094379816296449e-07	7.817846213569474e-07	M2	1.4478799	myosin heavy chain putative
TGME49_253970	2.72799	1.4478383	0.0001749682620346444	0.0003491515424922739	M2	1.4478383	hypothetical protein
TGME49_243310	2.7274454	1.4475503	7.638923822755123e-06	2.046166251223567e-05	M2	1.4475503	hypothetical protein
TGME49_287260	2.7266304	1.4471192	1.1632466560190442e-05	2.9925715342517327e-05	M2	1.4471192	hypothetical protein
TGME49_253390	2.7263575	1.4469748	0.0024623430982425422	0.003807733124107543	M2	1.4469748	hypothetical protein
TGME49_203220	2.7254086	1.4464725	8.346539604826772e-09	4.05382794255121e-08	M2	1.4464725	DEAD/DEAH box helicase domain-containing protein
TGME49_270010	2.7244494	1.4459647	7.416289071290054e-09	3.627028873927792e-08	M2	1.4459647	hypothetical protein
TGME49_246640	2.7237833	1.445612	9.757845090421432e-05	0.00020579872438021343	M2	1.445612	hypothetical protein
TGME49_263450	2.721739	1.4445288	0.008672044000753554	0.012018275475626151	M2	1.4445288	hypothetical protein
TGME49_226320	2.7186868	1.44291	0.0012631492347504904	0.002076015982667521	M2	1.44291	hypothetical protein
TGME49_262460	2.7159996	1.4414833	1.1323683266413414e-09	6.299963613196824e-09	M2	1.4414833	hypothetical protein
TGME49_262030	2.7158515	1.4414046	6.488696251143701e-08	2.6671192615960804e-07	M2	1.4414046	ALG6 ALG8 glycosyltransferase family protein
TGME49_230080	2.7143538	1.4406087	5.977531731088802e-14	5.773270932506453e-13	M2	1.4406087	DEAD/DEAH box helicase domain-containing protein
TGME49_290180	2.7137525	1.4402891	0.006234999130522141	0.008896163709613812	M2	1.4402891	AP2 domain transcription factor AP2IX-6
TGME49_240740	2.7113137	1.438992	4.878516377167718e-10	2.893216975680308e-09	M2	1.438992	Sec1 family protein
TGME49_297170	2.7097783	1.4381748	0.000567816341261757	0.001015795067739862	M2	1.4381748	50S ribosomal protein L17 putative
TGME49_259870	2.7095978	1.4380788	5.732142752808575e-10	3.366389048226913e-09	M2	1.4380788	hypothetical protein
TGME49_215320	2.7088552	1.4376832	3.6310415412855266e-06	1.0469441168680991e-05	M2	1.4376832	hypothetical protein
TGME49_268835	2.7084405	1.4374624	0.0032796583139017535	0.004940533406556813	M2	1.4374624	hypothetical protein
TGME49_207920	2.7082865	1.4373803	0.0007142375791782035	0.0012499527400362388	M2	1.4373803	hypothetical protein
TGME49_299240	2.7082658	1.4373693	3.7730008462375314e-06	1.083439692543438e-05	M2	1.4373693	hypothetical protein
TGME49_273380	2.7081878	1.4373279	9.808394830489014e-14	9.303113884675942e-13	M2	1.4373279	ion channel protein
TGME49_264430	2.7069924	1.4366908	0.00013042586081379504	0.00026733663588100455	M2	1.4366908	hypothetical protein
TGME49_270660	2.7069442	1.4366652	0.001036913123764901	0.0017404077078326074	M2	1.4366652	hypothetical protein
TGME49_254220	2.7060666	1.4361974	8.5497477423268e-06	2.270707673488491e-05	M2	1.4361974	hypothetical protein
TGME49_254950	2.7050486	1.4356545	5.6725984242333905e-05	0.0001264551023033405	M2	1.4356545	RNA cap guanine-N2 methyltransferase
TGME49_259560	2.7045612	1.4353945	1.8463700205177578e-05	4.573174983410191e-05	M2	1.4353945	endonuclease/exonuclease/phosphatase family protein
TGME49_242360	2.7044506	1.4353355	9.006986431749578e-05	0.00019163656176917344	M2	1.4353355	tetratricopeptide repeat-containing protein
TGME49_254450	2.7032835	1.4347129	1.1739702444296592e-05	3.016486024832791e-05	M2	1.4347129	Pelota putative
TGME49_206360	2.7021265	1.4340951	1.2755859386367904e-07	4.926863239222813e-07	M2	1.4340951	peptidyl-tRNA hydrolase domain-containing protein
TGME49_215750	2.7020497	1.4340543	8.018783479693939e-10	4.594355199111422e-09	M2	1.4340543	cytidine and deoxycytidylate deaminase zinc-binding region domain-containing protein
TGME49_243265	2.7013574	1.4336846	2.2983508385105255e-07	8.478115642187888e-07	M2	1.4336846	protamine P1 protein
TGME49_254835	2.6997151	1.4328072	2.0155652086822306e-05	4.941555433296643e-05	M2	1.4328072	hypothetical protein
TGME49_228640	2.699096	1.4324763	0.015849780333309138	0.020850948567371658	M2	1.4324763	hypothetical protein
TGME49_212110	2.6975703	1.4316607	0.0005339608393154816	0.0009599027979270656	M2	1.4316607	histone lysine demethylase JMJD5
TGME49_246750	2.697067	1.4313914	1.0207666365204648e-06	3.296331236237848e-06	M2	1.4313914	hypothetical protein
TGME49_313590	2.695401	1.4304999	1.6648990230322475e-12	1.401400562116088e-11	M2	1.4304999	hypothetical protein
TGME49_239110	2.6944008	1.4299644	2.6191365886788823e-06	7.81855291802375e-06	M2	1.4299644	leucine rich repeat-containing protein
TGME49_282230	2.6940598	1.4297819	3.278463368062657e-07	1.174493171831179e-06	M2	1.4297819	sulfate adenylyltransferase/adenylylsulfate kinase
TGME49_243370	2.6930668	1.42925	0.011373198165267183	0.015415380544454365	M2	1.42925	hypothetical protein
TGME49_299820	2.692807	1.4291108	0.0005242060136759714	0.0009435708246167486	M2	1.4291108	hypothetical protein
TGME49_240870	2.6903093	1.427772	3.5131956349941223e-10	2.1267919993793214e-09	M2	1.427772	beta adaptin protein putative
TGME49_309090	2.6902628	1.4277471	7.268057194300083e-08	2.9487446638996645e-07	M2	1.4277471	hypothetical protein
TGME49_216700	2.6898947	1.4275497	0.011596431824260692	0.01569278548387944	M2	1.4275497	hypothetical protein
TGME49_214990	2.6891394	1.4271445	2.4634374598574625e-12	2.037036200905618e-11	M2	1.4271445	hypothetical protein
TGME49_274190	2.6865401	1.4257494	5.277298756039179e-08	2.2002196244344894e-07	M2	1.4257494	eukaryotic initiation factor 2B epsilon subunit putative
TGME49_312875	2.685714	1.4253057	1.8026516715831133e-07	6.797951484403789e-07	M2	1.4253057	hypothetical protein
TGME49_284580	2.6852157	1.425038	5.216565052952074e-08	2.1759719280601175e-07	M2	1.425038	ribose-phosphate diphosphokinase subfamily protein
TGME49_267740	2.6830845	1.4238925	3.129883423995116e-06	9.158810531919225e-06	M2	1.4238925	hypothetical protein
TGME49_281620	2.6830354	1.423866	1.117503227590756e-06	3.57999233372611e-06	M2	1.423866	aldo/keto reductase family oxidoreductase
TGME49_255860	2.6815252	1.4230539	0.023894628386397592	0.030388789239043798	M2	1.4230539	hypothetical protein
TGME49_203830	2.681152	1.422853	1.9009928629258788e-08	8.586472840505934e-08	M2	1.422853	FHA domain-containing protein
TGME49_241850	2.6809661	1.422753	1.744049963342828e-09	9.41786980205127e-09	M2	1.422753	hypothetical protein
TGME49_262520	2.6806846	1.4226015	4.7213346389412834e-08	1.9890328531252635e-07	M2	1.4226015	cyclophilin putative
TGME49_272390	2.6804547	1.4224777	8.022228209135034e-05	0.00017294859845765352	M2	1.4224777	hypothetical protein
TGME49_278320	2.680061	1.4222659	0.03038254776954836	0.037809293358924044	M2	1.4222659	Toxoplasma gondii family A protein
TGME49_247500	2.6786096	1.4214844	7.591833643874852e-09	3.7085887933171313e-08	M2	1.4214844	acyl-CoA dehydrogenase middle domain-containing protein
TGME49_209300	2.6753602	1.419733	6.810297260928695e-08	2.781721708656762e-07	M2	1.419733	WD domain G-beta repeat-containing protein
TGME49_249800	2.6749501	1.419512	0.028733555618527196	0.035947783646509746	M2	1.419512	hypothetical protein
TGME49_229300	2.6744776	1.4192572	5.1154899334895385e-05	0.00011534419804674517	M2	1.4192572	hypothetical protein
TGME49_273850	2.674407	1.419219	0.004954320372248375	0.0072026426055171195	M2	1.419219	hypothetical protein
TGME49_288310	2.673582	1.418774	0.00012102254976868298	0.0002498806665270315	M2	1.418774	hypothetical protein
TGME49_208990	2.673567	1.4187658	0.019192520605984833	0.024823384089558895	M2	1.4187658	hypothetical protein
TGME49_215040	2.6724343	1.4181545	8.041574063496384e-10	4.6042914912336e-09	M2	1.4181545	HEAT repeat-containing protein
TGME49_207005	2.6711109	1.4174398	0.000577318647914585	0.0010308303176687424	M2	1.4174398	SAG-related sequence SRS48Q
TGME49_242230	2.6676795	1.4155854	0.009682711960281714	0.013273089825846027	M2	1.4155854	rhoptry kinase family protein ROP29
TGME49_259080	2.6660006	1.4146771	0.0011903528944987383	0.0019690100433370204	M2	1.4146771	hypothetical protein
TGME49_233820	2.6652708	1.4142821	2.9155856117410897e-07	1.0543266583151025e-06	M2	1.4142821	DNA polymerase epsilon subunit B protein
TGME49_256820	2.6650996	1.4141895	8.255060411389151e-05	0.00017737990220353348	M2	1.4141895	zinc finger (CCCH type) motif-containing protein
TGME49_249930	2.6650038	1.4141376	3.6154453884065848e-06	1.043159063756369e-05	M2	1.4141376	hypothetical protein
TGME49_218930	2.6641233	1.4136609	8.209329298170367e-06	2.1864809927147108e-05	M2	1.4136609	BTB/POZ domain-containing protein
TGME49_272530	2.6635425	1.4133463	0.007634639394997978	0.010706992619835367	M2	1.4133463	hypothetical protein
TGME49_273630	2.6632109	1.4131666	5.164681186455116e-05	0.00011632921297103461	M2	1.4131666	DnaJ domain-containing protein
TGME49_259860	2.6620374	1.4125309	1.678385408678305e-08	7.679499235917898e-08	M2	1.4125309	hypothetical protein
TGME49_294190	2.661034	1.4119871	3.0359474455901885e-06	8.930313909739883e-06	M2	1.4119871	enoyl-CoA hydratase/isomerase family protein
TGME49_226620	2.66056	1.4117298	6.63440323391839e-08	2.7217156179536074e-07	M2	1.4117298	hypothetical protein
TGME49_278145	2.6596177	1.4112189	5.849855141937025e-05	0.00012999507179729109	M2	1.4112189	hypothetical protein
TGME49_289280	2.6590562	1.4109143	0.00016420839382614845	0.0003292349077638862	M2	1.4109143	hypothetical protein
TGME49_234970	2.658378	1.4105462	3.687097070702764e-13	3.2834201627512176e-12	M2	1.4105462	Tyrosine kinase-like (TKL) protein
TGME49_212735	2.658144	1.4104192	6.758926241956233e-10	3.917673914319076e-09	M2	1.4104192	hypothetical protein
TGME49_252420	2.6580348	1.41036	3.0739523287809346e-07	1.1054455800224544e-06	M2	1.41036	histone arginine methyltransferase PRMT3
TGME49_278300	2.6574001	1.4100155	0.030095008548590263	0.037495638691454565	M2	1.4100155	Toxoplasma gondii family A protein
TGME49_219250	2.6568983	1.409743	0.00018201651806376147	0.0003619344927427878	M2	1.409743	acetyltransferase GNAT family protein
TGME49_244920	2.6568673	1.4097261	0.010151926121948004	0.013873532932823833	M2	1.4097261	Toxoplasma gondii family B protein
TGME49_269740	2.656785	1.4096816	3.908066921914154e-09	1.9955935684046235e-08	M2	1.4096816	R3H domain-containing protein
TGME49_200600	2.6552746	1.408861	7.100244405543912e-06	1.9195190489843763e-05	M2	1.408861	hypothetical protein
TGME49_284010	2.6545029	1.4084417	1.359148926093791e-07	5.21387543096624e-07	M2	1.4084417	5'-3' exonuclease N-terminal resolvase family domain-containing protein
TGME49_270540	2.6539686	1.4081513	0.000425298354458501	0.0007825378605549296	M2	1.4081513	Trm112p family domain-containing protein
TGME49_226480	2.6535106	1.4079022	4.793628795994066e-22	8.864542003270426e-21	M2	1.4079022	DNA topoisomerase family protein
TGME49_216910	2.6534894	1.4078908	0.00029447521415993847	0.0005592382100821663	M2	1.4078908	hypothetical protein
TGME49_242600	2.6526327	1.4074249	3.050977769379621e-07	1.0981181060062682e-06	M2	1.4074249	6-phosphogluconate dehydrogenase
TGME49_261510	2.6491146	1.4055102	0.0006008850410591676	0.0010663753637108412	M2	1.4055102	hypothetical protein
TGME49_269210	2.648833	1.4053569	2.5015775101912256e-06	7.494091293380379e-06	M2	1.4053569	hypothetical protein
TGME49_261430	2.6487136	1.4052918	0.004359870140511238	0.006404530255077433	M2	1.4052918	hypothetical protein
TGME49_259150	2.6486368	1.4052501	0.0001395073603558873	0.0002841592437617748	M2	1.4052501	hypothetical protein
TGME49_269310	2.646283	1.4039673	0.0011676798903830483	0.001934534944839667	M2	1.4039673	hypothetical protein
TGME49_224860	2.643584	1.4024951	1.1461958304859519e-07	4.4658833395282526e-07	M2	1.4024951	exosome component 2 putative
TGME49_283765	2.6412022	1.4011948	1.4619951072584298e-05	3.6903586175152304e-05	M2	1.4011948	B9 domain-containing protein
TGME49_316780	2.6391532	1.4000751	0.0008037182538844331	0.0013870171459214509	M2	1.4000751	hypothetical protein
TGME49_266480	2.6383765	1.3996505	0.0005529509704131927	0.000991300095664381	M2	1.3996505	hypothetical protein
TGME49_255500	2.637964	1.3994249	1.293750918505828e-07	4.990182114236766e-07	M2	1.3994249	hypothetical protein
TGME49_239320	2.637798	1.3993342	0.007363473770202954	0.010362817124393867	M2	1.3993342	BolA family protein
TGME49_200280	2.6354563	1.3980528	1.4542381949535551e-05	3.671875406499102e-05	M2	1.3980528	WD domain G-beta repeat-containing protein
TGME49_260270	2.6354449	1.3980465	3.2903212334187765e-12	2.6609095448442182e-11	M2	1.3980465	HEAT repeat-containing protein
TGME49_213880	2.632373	1.396364	0.035049238436368445	0.04302747153192181	M2	1.396364	hypothetical protein
TGME49_270450	2.6320484	1.396186	5.460749244475278e-09	2.717832265315699e-08	M2	1.396186	MCM2/3/5 family protein
TGME49_231790	2.6307175	1.3954563	5.7485910534125714e-05	0.00012798035561746482	M2	1.3954563	hypothetical protein
TGME49_233065	2.6305828	1.3953825	8.935009244467806e-06	2.3604177281962313e-05	M2	1.3953825	3'5'-cyclic nucleotide phosphodiesterase domain-containing protein
TGME49_277820	2.6293724	1.3947184	4.3164158758344494e-08	1.832146186171619e-07	M2	1.3947184	hypothetical protein
TGME49_256800	2.6278272	1.3938704	3.5113935484744375e-07	1.2484134151517657e-06	M2	1.3938704	hypothetical protein
TGME49_215100	2.6275837	1.3937367	5.30960744216639e-11	3.654030333367114e-10	M2	1.3937367	PP-loop family protein
TGME49_278470	2.6272967	1.3935791	2.6823437477073794e-06	7.98186162389967e-06	M2	1.3935791	hypothetical protein
TGME49_318410	2.626749	1.3932784	1.3014643368197294e-05	3.3118564018258154e-05	M2	1.3932784	TCP-1 chaperonin putative
TGME49_253350	2.626362	1.3930658	4.370375632765019e-05	9.992977400567418e-05	M2	1.3930658	hypothetical protein
TGME49_268320	2.6262867	1.3930244	1.1518190380370713e-05	2.966785336925111e-05	M2	1.3930244	hypothetical protein
TGME49_209540	2.625998	1.3928658	0.0024873122024193007	0.003844234715187548	M2	1.3928658	hypothetical protein
TGME49_289023	2.6248436	1.3922315	0.0018817546753477912	0.0029897929613393838	M2	1.3922315	hypothetical protein
TGME49_252870	2.6200476	1.389593	8.500432992151332e-09	4.121466392235852e-08	M2	1.389593	hypothetical protein
TGME49_283760	2.6199946	1.3895638	7.771865546800461e-05	0.00016797963103839053	M2	1.3895638	hypothetical protein
TGME49_219840	2.6193848	1.389228	0.0009430146898461667	0.0016002845670461756	M2	1.389228	hypothetical protein
TGME49_259160	2.615797	1.3872507	2.390990091215858e-09	1.263680879353672e-08	M2	1.3872507	hypothetical protein
TGME49_312930	2.6150723	1.3868508	1.4915223923401868e-05	3.7603984897574343e-05	M2	1.3868508	cystathione gamma lyase putative
TGME49_253030	2.614899	1.3867552	2.959258885787498e-11	2.108659093068309e-10	M2	1.3867552	glycosyl hydrolase family 31 protein
TGME49_277030	2.6145263	1.3865496	2.6992434068556366e-12	2.206122440167987e-11	M2	1.3865496	isoleucyl-tRNA synthetase putative
TGME49_242030	2.6141894	1.3863636	1.9715620338162258e-09	1.0538691175066998e-08	M2	1.3863636	hypothetical protein
TGME49_310720	2.613729	1.3861096	1.0280098147877789e-14	1.062067352661555e-13	M2	1.3861096	hypothetical protein
TGME49_230000	2.613347	1.3858987	1.7532251737367867e-16	2.1504362762336114e-15	M2	1.3858987	hypothetical protein
TGME49_226780	2.6130795	1.385751	0.00033655513983687444	0.0006320505526136501	M2	1.385751	zinc finger C3HC4 type (RING finger) domain-containing protein
TGME49_240390	2.6113455	1.3847934	1.4437147566167394e-10	9.334991130962558e-10	M2	1.3847934	calcium-dependent protein kinase
TGME49_315845	2.6111748	1.3846991	0.03548824352483328	0.04352846821892105	M2	1.3846991	kinesin motor domain-containing protein
TGME49_235350	2.6110146	1.3846105	0.0001822375431458444	0.00036220354589029425	M2	1.3846105	cwfj family protein
TGME49_216270	2.6109364	1.3845673	0.0077951583150095574	0.010904963237898656	M2	1.3845673	hypothetical protein
TGME49_297390	2.610447	1.3842969	4.305481809979309e-05	9.868626736136463e-05	M2	1.3842969	hypothetical protein
TGME49_253560	2.6091194	1.383563	4.525136701168188e-07	1.5750383139033095e-06	M2	1.383563	hypothetical protein
TGME49_238980	2.6089675	1.383479	0.00035014503281901227	0.0006556781901957617	M2	1.383479	hypothetical protein
TGME49_316490	2.6070478	1.3824171	5.812264845754947e-05	0.00012932977938777003	M2	1.3824171	hypothetical protein
TGME49_226840	2.6024432	1.3798667	1.472980933823149e-07	5.622476003495678e-07	M2	1.3798667	hypothetical protein
TGME49_259070	2.600867	1.3789927	0.008755713838803284	0.012120317387670197	M2	1.3789927	acetyltransferase GNAT family protein
TGME49_258030	2.6003888	1.3787273	2.8354889919660013e-08	1.2441701698392874e-07	M2	1.3787273	DNA polymerase
TGME49_259168	2.6000423	1.378535	7.799897521778214e-09	3.8036315035515114e-08	M2	1.378535	hypothetical protein
TGME49_203620	2.598576	1.3777213	8.626639131490747e-06	2.2889710298344834e-05	M2	1.3777213	hypothetical protein
TGME49_216050	2.5973632	1.3770478	0.00024419034780652135	0.00047233980986791297	M2	1.3770478	tetratricopeptide repeat-containing protein
TGME49_247660	2.597108	1.3769059	6.672072354186255e-09	3.285878989815154e-08	M2	1.3769059	thioredoxin domain-containing protein
TGME49_240400	2.5962563	1.3764328	0.02327816485521608	0.029685192574533135	M2	1.3764328	hypothetical protein
TGME49_310940	2.593698	1.3750105	0.019137553620952673	0.02475986920555282	M2	1.3750105	hypothetical protein
TGME49_258000	2.5935488	1.3749275	9.67092041316107e-05	0.0002043223710290605	M2	1.3749275	hypothetical protein
TGME49_278565	2.5926304	1.3744166	0.008565355227510554	0.0118840612424383	M2	1.3744166	hypothetical protein
TGME49_314340	2.590519	1.3732412	9.424007410450377e-07	3.0619871828418355e-06	M2	1.3732412	Sodium:neurotransmitter symporter family protein
TGME49_288920	2.5893872	1.3726107	2.2451170314494773e-10	1.39613569041792e-09	M2	1.3726107	ATP-binding cassette G family transporter ABCG96
TGME49_310900	2.5890994	1.3724504	1.9332701946576794e-10	1.2183494716668196e-09	M2	1.3724504	AP2 domain transcription factor AP2XI-2
TGME49_320560	2.588529	1.3721325	6.737990079230768e-05	0.0001478648511025168	M2	1.3721325	p25-alpha family protein
TGME49_225980	2.587933	1.3718003	1.7453063832275114e-06	5.3771725281282165e-06	M2	1.3718003	hypothetical protein
TGME49_315480	2.587829	1.3717424	5.87272950060595e-20	9.618301746050558e-19	M2	1.3717424	acyl-CoA dehydrogenase middle domain-containing protein
TGME49_257770	2.587745	1.3716954	8.0934654410925e-07	2.6738810180872837e-06	M2	1.3716954	histone lysine methyltransferase SET2
TGME49_274180	2.586971	1.3712639	2.008677802715163e-08	9.029434101460554e-08	M2	1.3712639	hypothetical protein
TGME49_240295	2.5867212	1.3711245	0.00015781070959958253	0.0003174621058857586	M2	1.3711245	hypothetical protein
TGME49_297310	2.584638	1.3699622	0.001057268302295597	0.001769301865881206	M2	1.3699622	hypothetical protein
TGME49_257080	2.5836987	1.3694379	4.900314807849552e-09	2.4577187205422294e-08	M2	1.3694379	3'5'-cyclic nucleotide phosphodiesterase domain-containing protein
TGME49_309550	2.5826318	1.368842	0.0006637230572791612	0.001168324006887355	M2	1.368842	hypothetical protein
TGME49_247630	2.5820768	1.368532	0.00019937456198428917	0.00039284551721362274	M2	1.368532	membrane protein putative
TGME49_214510	2.5804772	1.3676379	2.614027232380868e-07	9.526150987861456e-07	M2	1.3676379	hypothetical protein
TGME49_247680	2.576227	1.3652596	1.112035883511736e-08	5.2648824938698496e-08	M2	1.3652596	hypothetical protein
TGME49_312300	2.5754478	1.3648233	2.553255679327516e-07	9.340936686578716e-07	M2	1.3648233	Sec7 domain-containing protein
TGME49_215340	2.5738451	1.3639252	7.604249811893635e-06	2.038817105339883e-05	M2	1.3639252	AP2 domain transcription factor AP2X-10
TGME49_217790	2.5733292	1.363636	1.9046982677710962e-07	7.147693188691622e-07	M2	1.363636	S1 RNA binding domain-containing protein
TGME49_224235	2.5731125	1.3635145	9.863745593861039e-08	3.8825577090693826e-07	M2	1.3635145	translation initiation factor IF-3 protein
TGME49_208760	2.572283	1.3630494	0.0004169971065919727	0.000768099945032424	M2	1.3630494	hypothetical protein
TGME49_275770	2.572159	1.3629799	0.0013261059404222938	0.002169781471928133	M2	1.3629799	hypothetical protein
TGME49_222440	2.571629	1.3626826	0.00043607770714538613	0.000799759701190464	M2	1.3626826	hypothetical protein
TGME49_213325	2.5711122	1.3623925	1.4028576528612783e-13	1.3100055275503493e-12	M2	1.3623925	TBC domain-containing protein
TGME49_207070	2.569752	1.3616291	3.537770553219991e-05	8.24991692750059e-05	M2	1.3616291	glycosyl transferase putative
TGME49_244170	2.568268	1.3607957	1.7406138299988126e-07	6.587517902964606e-07	M2	1.3607957	hypothetical protein
TGME49_314320	2.5671375	1.3601606	2.1413082130293965e-06	6.4860916517245265e-06	M2	1.3601606	hypothetical protein
TGME49_252255	2.5669708	1.3600669	0.0021780519583206423	0.0034149753431851108	M2	1.3600669	hypothetical protein
TGME49_286520	2.5660307	1.3595384	0.0006749352194791739	0.0011865773954271893	M2	1.3595384	hypothetical protein
TGME49_278390	2.5658908	1.3594598	6.288521184134764e-05	0.00013875794393504673	M2	1.3594598	Toxoplasma gondii family A protein
TGME49_256035	2.5657005	1.3593528	0.0012389853396770508	0.0020418613700488994	M2	1.3593528	hypothetical protein
TGME49_237860	2.564779	1.3588345	2.0898459518334894e-08	9.374356761647994e-08	M2	1.3588345	protein kinase domain-containing protein
TGME49_231370	2.5631511	1.3579185	2.5708017595984806e-06	7.69056483906788e-06	M2	1.3579185	phospholipase patatin family protein
TGME49_246970	2.562686	1.3576567	0.0040277558954728235	0.005964353438346036	M2	1.3576567	3'-5' exonuclease domain-containing protein
TGME49_223880	2.5606995	1.3565379	3.9975879557354335e-11	2.796656938238423e-10	M2	1.3565379	zinc finger C3HC4 type (RING finger) domain-containing protein
TGME49_267775	2.560502	1.3564267	0.002320425854631124	0.003612068317827893	M2	1.3564267	hypothetical protein
TGME49_260390	2.5596783	1.3559625	0.00018909384464652456	0.00037415876401493306	M2	1.3559625	hypothetical protein
TGME49_278030	2.5595965	1.3559164	1.1603128086188602e-05	2.9877524514436277e-05	M2	1.3559164	hypothetical protein
TGME49_223610	2.5586736	1.3553962	3.04922840481965e-07	1.0979560821956056e-06	M2	1.3553962	hypothetical protein
TGME49_278250	2.5580828	1.355063	5.761759136202076e-11	3.9363481374328007e-10	M2	1.355063	hypothetical protein
TGME49_230450	2.5566773	1.3542701	0.00043201209276006396	0.0007931640660254835	M2	1.3542701	bifunctional GMP synthase/glutamine amidotransferase protein
TGME49_266130	2.5563211	1.3540691	0.001543836476446646	0.0024922563634098577	M2	1.3540691	peroxiredoxin PRX2
TGME49_233720	2.5553849	1.3535407	0.03421000621707238	0.04210730593365551	M2	1.3535407	DNA-directed RNA polymerase II RPBABC8
TGME49_314770	2.5551581	1.3534126	0.0024990623960662976	0.0038602771539309596	M2	1.3534126	tRNA (guanine-N1)-methyltransferase
TGME49_258105	2.554953	1.3532968	0.0008042600469892663	0.001387668774419414	M2	1.3532968	hypothetical protein
TGME49_314270	2.5529687	1.352176	0.004759939029565762	0.0069451389397203475	M2	1.352176	peptidyl-tRNA hydrolase domain-containing protein
TGME49_232380	2.5522122	1.3517483	0.0002366167800594306	0.00045874017166374123	M2	1.3517483	WD domain G-beta repeat-containing protein
TGME49_225430	2.5516925	1.3514545	0.039006070351300444	0.0475191437997463	M2	1.3514545	Ras-related GTP binding A family protein
TGME49_249290	2.5503464	1.3506932	4.926206233783044e-06	1.3776098240139148e-05	M2	1.3506932	hypothetical protein
TGME49_236400	2.5502172	1.35062	0.02250131850856113	0.028755276382254665	M2	1.35062	hypothetical protein
TGME49_273020	2.5495598	1.3502482	0.007592956404296688	0.010664463116621456	M2	1.3502482	hypothetical protein
TGME49_218610	2.5484889	1.349642	2.949028595466849e-09	1.5308501634084975e-08	M2	1.349642	ATPase (DUF699) protein
TGME49_216965	2.5475466	1.3491086	2.1668910209053958e-05	5.2773475555249284e-05	M2	1.3491086	leucine rich repeat-containing protein
TGME49_259172	2.5467389	1.348651	2.6311444859839673e-05	6.311610005975165e-05	M2	1.348651	hypothetical protein
TGME49_256865	2.545105	1.3477252	1.1464384094158155e-08	5.415623811052575e-08	M2	1.3477252	WD repeat domain 35 family protein
TGME49_273410	2.5445287	1.3473985	1.576857982515627e-06	4.908297167675714e-06	M2	1.3473985	tyrosine-tRNA ligase
TGME49_263980	2.5440369	1.3471196	1.131871627331242e-09	6.301348565597052e-09	M2	1.3471196	pentatricopeptide repeat domain-containing protein
TGME49_312110	2.5439677	1.3470803	4.016939969115302e-08	1.7127729404133914e-07	M2	1.3470803	apicoplast-associated thioredoxin family protein Atrx1
TGME49_265538	2.542228	1.3460934	0.0002158999637332944	0.0004218660331815193	M2	1.3460934	hypothetical protein
TGME49_205615	2.5421681	1.3460594	2.274163933205995e-13	2.0665547741423513e-12	M2	1.3460594	hypothetical protein
TGME49_293030	2.5415268	1.3456955	3.878821914970658e-08	1.6597429875147863e-07	M2	1.3456955	hypothetical protein
TGME49_206380	2.5414104	1.3456295	2.3235449814838654e-10	1.4427831475767924e-09	M2	1.3456295	hypothetical protein
TGME49_310055	2.540047	1.3448552	0.006249769655501472	0.008911220408072034	M2	1.3448552	hypothetical protein
TGME49_232680	2.540046	1.3448546	0.00013662575352275618	0.00027882739507867967	M2	1.3448546	hypothetical protein
TGME49_277050	2.5393183	1.3444413	1.9506045024430995e-06	5.953253394780294e-06	M2	1.3444413	hypothetical protein
TGME49_261490	2.539222	1.3443866	1.1696741568560283e-05	3.0072760266474886e-05	M2	1.3443866	hypothetical protein
TGME49_261690	2.5388613	1.3441815	0.0006956252842086438	0.0012199064695678041	M2	1.3441815	hypothetical protein
TGME49_310910	2.538191	1.3438007	3.4330113894257123e-07	1.2241510232926875e-06	M2	1.3438007	WD domain G-beta repeat-containing protein
TGME49_204160	2.5376496	1.3434929	0.00015182243736720397	0.0003065833735221603	M2	1.3434929	GYF domain-containing protein
TGME49_257640	2.5373633	1.3433301	0.0009678351102111351	0.0016387847157672416	M2	1.3433301	hypothetical protein
TGME49_306580	2.5373373	1.3433154	1.2547520191581122e-07	4.855269832374179e-07	M2	1.3433154	hypothetical protein
TGME49_272540	2.5364225	1.3427951	1.668349386066522e-10	1.067314206029385e-09	M2	1.3427951	protein kinase (incomplete catalytic triad)
TGME49_297920	2.5346265	1.3417732	0.025670276322749232	0.03246625339771831	M2	1.3417732	hypothetical protein
TGME49_240330	2.5326178	1.3406293	1.805944385681942e-05	4.4796113893155536e-05	M2	1.3406293	Toxoplasma gondii family E protein
TGME49_254555	2.5323386	1.3404703	4.44300405956892e-06	1.257883661890015e-05	M2	1.3404703	histone lysine acetyltransferase GCN5-A
TGME49_247050	2.532235	1.3404112	3.808492211369008e-08	1.633785161333984e-07	M2	1.3404112	hypothetical protein
TGME49_254540	2.5309536	1.3396811	0.02387284232351792	0.03036565178748494	M2	1.3396811	CDP-alcohol phosphatidyltransferase superfamily protein
TGME49_268290	2.5297887	1.3390169	0.0028949760484098808	0.004416144870958827	M2	1.3390169	DEAD/DEAH box helicase domain-containing protein
TGME49_319580	2.529605	1.338912	2.6624481597547233e-08	1.1743397389398312e-07	M2	1.338912	hypothetical protein
TGME49_264220	2.5290787	1.338612	6.938122997026233e-05	0.0001518624124523924	M2	1.338612	hypothetical protein
TGME49_277880	2.5286484	1.3383664	0.004012587911072154	0.00594710284750452	M2	1.3383664	hypothetical protein
TGME49_258970	2.5281544	1.3380846	2.1234409527475025e-09	1.1307624128335944e-08	M2	1.3380846	hypothetical protein
TGME49_271360	2.5280983	1.3380525	0.03207794732821917	0.03966794452308753	M2	1.3380525	hypothetical protein
TGME49_223630	2.5272853	1.3375885	6.709586979317553e-06	1.824999020348009e-05	M2	1.3375885	hypothetical protein
TGME49_258010	2.5262284	1.3369851	8.124632175203406e-07	2.682080723150156e-06	M2	1.3369851	calcium signaling protein kinase RAD53 putative
TGME49_254790	2.5261374	1.3369331	1.3821279536965767e-08	6.414257735689055e-08	M2	1.3369331	hypothetical protein
TGME49_309050	2.5258605	1.336775	0.0005020984633771902	0.0009095893063238231	M2	1.336775	hypothetical protein
TGME49_312460	2.5258415	1.3367641	4.4343025685726744e-05	0.00010117249191956715	M2	1.3367641	zinc finger MYND-type containing 12 family protein
TGME49_205770	2.524929	1.3362429	0.006239157508244156	0.008900594210359785	M2	1.3362429	hypothetical protein
TGME49_278680	2.5235283	1.3354423	4.896932061367454e-06	1.3698766253100414e-05	M2	1.3354423	hypothetical protein
TGME49_228400	2.5233722	1.335353	3.560757260098497e-07	1.2643680506341345e-06	M2	1.335353	WD domain G-beta repeat-containing protein
TGME49_315310	2.5221295	1.3346424	6.33307491880779e-09	3.126215895960551e-08	M2	1.3346424	hypothetical protein
TGME49_311625	2.52209	1.3346198	8.539931235774328e-12	6.560996261229895e-11	M2	1.3346198	WD domain G-beta repeat-containing protein
TGME49_244406	2.5217085	1.3344015	0.0002286174467982417	0.00044455730393279814	M2	1.3344015	cysteine dioxygenase type i protein
TGME49_262700	2.52121	1.3341162	1.8284344627497577e-10	1.1591972726705327e-09	M2	1.3341162	tetratricopeptide repeat-containing protein
TGME49_257420	2.51973	1.3332692	0.002956252636457784	0.004496632654914458	M2	1.3332692	hypothetical protein
TGME49_227350	2.5191286	1.3329247	1.1145300351415214e-17	1.5142915316689708e-16	M2	1.3329247	hypothetical protein
TGME49_318190	2.5181057	1.3323388	1.2439526649838453e-07	4.817893662593253e-07	M2	1.3323388	phosphoglycerate mutase family protein
TGME49_208020	2.5179815	1.3322678	1.0506325803979913e-10	6.947492908406435e-10	M2	1.3322678	AP2 domain transcription factor AP2Ib-1
TGME49_235905	2.517439	1.3319567	7.107369932121996e-10	4.0999579041886e-09	M2	1.3319567	ribonuclease z putative
TGME49_205120	2.5171762	1.3318062	1.219599889627989e-07	4.734422906406125e-07	M2	1.3318062	hypothetical protein
TGME49_214420	2.5167012	1.3315339	0.002660727500179981	0.004087585548813129	M2	1.3315339	hypothetical protein
TGME49_260430	2.5166774	1.3315203	0.0018618743651364687	0.0029609898870471014	M2	1.3315203	hypothetical protein
TGME49_295600	2.516329	1.3313205	3.671522646612354e-05	8.538260287980464e-05	M2	1.3313205	SAG-related sequence SRS10
TGME49_263310	2.5158005	1.3310175	0.021758926381284925	0.027861316189127107	M2	1.3310175	step ii splicing factor putative
TGME49_225120	2.5150797	1.3306041	1.6542742462500082e-10	1.0591114890196074e-09	M2	1.3306041	hypothetical protein
TGME49_221160	2.5149307	1.3305187	0.008908678983427601	0.012307870866265598	M2	1.3305187	acetyltransferase GNAT family protein
TGME49_311460	2.514365	1.330194	0.00013714957639227713	0.00027976130101161814	M2	1.330194	hypothetical protein
TGME49_315120	2.5137844	1.3298609	0.003790422661336771	0.005648538513658447	M2	1.3298609	hypothetical protein
TGME49_315885	2.5134544	1.3296715	3.731857471811639e-08	1.6033516773909587e-07	M2	1.3296715	glycosyltransferase putative
TGME49_290678	2.5132496	1.329554	3.6383104943913877e-07	1.2881173853415005e-06	M2	1.329554	hypothetical protein
TGME49_203760	2.5132089	1.3295306	7.992740935851591e-05	0.00017235686054830772	M2	1.3295306	hypothetical protein
TGME49_281420	2.5129778	1.3293979	1.1404126118130428e-05	2.9391970059262047e-05	M2	1.3293979	histone deacetylase HDAC1
TGME49_247250	2.5126739	1.3292234	3.18555727412868e-08	1.3855452662718207e-07	M2	1.3292234	RbAp46
TGME49_224220	2.512518	1.3291339	1.215218937801855e-12	1.0352636334035763e-11	M2	1.3291339	serine/threonine-protein phosphatase PP2A catalytic subunit
TGME49_252280	2.512288	1.3290019	1.0864922561462804e-05	2.8105130262296344e-05	M2	1.3290019	hypothetical protein
TGME49_270000	2.5104272	1.3279328	3.908203896400807e-05	9.03398006796587e-05	M2	1.3279328	NAD dependent epimerase/dehydratase family protein
TGME49_265205	2.5094423	1.3273668	8.65480309139116e-08	3.4517102843485934e-07	M2	1.3273668	WD domain G-beta repeat-containing protein
TGME49_230830	2.5079873	1.32653	1.37588408402068e-20	2.339556618522891e-19	M2	1.32653	ATPase family associated with various cellular activities (AAA) domain-containing protein
TGME49_214610	2.5063794	1.3256048	6.879034607638559e-11	4.661966436981032e-10	M2	1.3256048	hypothetical protein
TGME49_286220	2.5054455	1.3250672	5.05200749997865e-06	1.4090599136079068e-05	M2	1.3250672	GDP-L-fucose synthetase
TGME49_254760	2.5051186	1.3248789	3.7465010161450497e-06	1.0776609968496194e-05	M2	1.3248789	hypothetical protein
TGME49_297800	2.504906	1.3247564	6.022775766572313e-13	5.263544778004407e-12	M2	1.3247564	RecF/RecN/SMC N terminal domain-containing protein
TGME49_222430	2.5038357	1.3241398	4.156073485946834e-10	2.4839446272798225e-09	M2	1.3241398	HECT-domain (ubiquitin-transferase) domain-containing protein
TGME49_226080	2.5035136	1.3239543	9.194411234331453e-07	2.9954498589566347e-06	M2	1.3239543	polyA polymerase
TGME49_267650	2.5034025	1.3238902	1.9131233317311167e-10	1.2083561492122322e-09	M2	1.3238902	hypothetical protein
TGME49_278380	2.5030982	1.323715	0.0009029433733448366	0.0015397042873561773	M2	1.323715	Toxoplasma gondii family A protein
TGME49_278020	2.5027173	1.3234953	3.0616729811958045e-05	7.229449109831166e-05	M2	1.3234953	hypothetical protein
TGME49_241870	2.5024378	1.3233342	7.015257844422813e-05	0.0001532728646412027	M2	1.3233342	tRNA ligase class I (E and Q) catalytic domain-containing protein
TGME49_269000	2.5011942	1.322617	2.9441184211860418e-08	1.2878232286461303e-07	M2	1.322617	ABC transporter family protein
TGME49_259220	2.499236	1.3214872	0.0053052806294411805	0.0076654003418374795	M2	1.3214872	DEAD/DEAH box helicase domain-containing protein
TGME49_237595	2.4987452	1.3212038	0.000120634227966545	0.00024913975086639093	M2	1.3212038	hypothetical protein
TGME49_272550	2.4986377	1.3211417	4.188229572852729e-10	2.5013942134401707e-09	M2	1.3211417	hypothetical protein
TGME49_271280	2.498635	1.3211402	0.012668006205930811	0.017001321334972414	M2	1.3211402	60S ribosome subunit biogenesis protein NIP7 putative
TGME49_258840	2.4984143	1.3210127	1.5974306402610906e-08	7.356886289289633e-08	M2	1.3210127	hypothetical protein
TGME49_251480	2.4976616	1.3205781	8.542460617511944e-06	2.2694855290346884e-05	M2	1.3205781	DEAD/DEAH box helicase domain-containing protein
TGME49_246520	2.497107	1.3202577	2.2535455524317133e-05	5.4679051000862505e-05	M2	1.3202577	hypothetical protein
TGME49_215270	2.4959042	1.3195626	0.02520400585815671	0.03191953446834742	M2	1.3195626	hypothetical protein
TGME49_310130	2.4957314	1.3194627	4.456023250465986e-11	3.1019647849825407e-10	M2	1.3194627	Spc97 / Spc98 family protein
TGME49_203480	2.4951522	1.3191278	0.009646747839771753	0.013234523700310242	M2	1.3191278	hypothetical protein
TGME49_235710	2.494778	1.3189113	0.0003354480236311529	0.0006305318611447671	M2	1.3189113	hypothetical protein
TGME49_261200	2.4947333	1.3188856	0.00013800360553461338	0.00028129967929884655	M2	1.3188856	TBC domain-containing protein
TGME49_281440	2.4943948	1.3186898	1.1901958032162073e-10	7.791126826475731e-10	M2	1.3186898	hypothetical protein
TGME49_309950	2.4932027	1.3180002	0.00010122580451991708	0.00021290673817765538	M2	1.3180002	NLE (NUC135) domain-containing protein
TGME49_296231	2.4908838	1.3166578	4.5501238762461954e-05	0.00010356341739336546	M2	1.3166578	hypothetical protein
TGME49_206660	2.490855	1.3166411	2.2207123620049506e-05	5.3959862482184694e-05	M2	1.3166411	hypothetical protein
TGME49_249160	2.4903395	1.3163425	4.920313327660112e-05	0.00011144885535260147	M2	1.3163425	UAA transporter family protein
TGME49_310480	2.4901273	1.3162196	3.480858293024841e-07	1.2391210376728276e-06	M2	1.3162196	flagellar/basal body protein PACRG family protein
TGME49_296020	2.4899583	1.3161216	3.446073485826388e-06	9.990657642785182e-06	M2	1.3161216	hypothetical protein
TGME49_261500	2.4876125	1.3147618	1.5624813498377613e-09	8.486201727171544e-09	M2	1.3147618	hydrolase
TGME49_281675	2.4869444	1.3143742	1.731274022252267e-06	5.33977984016566e-06	M2	1.3143742	protein kinase putative
TGME49_319610	2.4860892	1.313878	3.512294671231966e-16	4.174740121882046e-15	M2	1.313878	eIF2 kinase IF2K-D (incomplete catalytic triad)
TGME49_270910	2.485755	1.3136841	1.4111810265837615e-13	1.3163234940021378e-12	M2	1.3136841	acyltransferase domain-containing protein
TGME49_242400	2.4856718	1.3136358	0.0011327358693244247	0.0018840288981816005	M2	1.3136358	calcium-dependent protein kinase CDPK2B
TGME49_253510	2.4850748	1.3132893	4.6113811954408064e-05	0.00010487293456046892	M2	1.3132893	transporter/permease protein
TGME49_272300	2.4846148	1.3130223	0.0007100289793532096	0.0012428448435198786	M2	1.3130223	hypothetical protein
TGME49_251910	2.483882	1.3125966	0.0020738156302060793	0.003266694481057144	M2	1.3125966	hypothetical protein
TGME49_240810	2.4832165	1.3122101	1.0902390604824383e-05	2.8184797492006992e-05	M2	1.3122101	hypothetical protein
TGME49_315590	2.4830325	1.3121032	2.3814869312733837e-05	5.7535580492256616e-05	M2	1.3121032	macro domain-containing protein
TGME49_226800	2.4827754	1.3119538	1.5977166542779797e-05	4.00305468286487e-05	M2	1.3119538	eukaryotic glutathione synthase atp binding domain-containing protein
TGME49_271420	2.4827626	1.3119463	0.0028158719786533196	0.004307137392144653	M2	1.3119463	porphobilinogen deaminase
TGME49_203890	2.4818199	1.3113984	0.0008997867540804455	0.001535250930493407	M2	1.3113984	hypothetical protein
TGME49_202070	2.481634	1.3112903	1.3570609577026813e-20	2.312202047085758e-19	M2	1.3112903	hypothetical protein
TGME49_312340	2.4800344	1.3103601	0.03176809814413874	0.039313544796619776	M2	1.3103601	hypothetical protein
TGME49_207650	2.479267	1.3099136	4.809794259344472e-05	0.00010906243972557052	M2	1.3099136	OTU family cysteine protease
TGME49_207630	2.4783645	1.3093884	0.00010187064950502345	0.00021404994007134592	M2	1.3093884	peptidyl-tRNA hydrolase domain-containing protein
TGME49_227115	2.4783468	1.3093781	9.481318933397531e-05	0.00020081861229609657	M2	1.3093781	hypothetical protein
TGME49_318350	2.4771476	1.3086798	8.622848163648329e-06	2.2886837258477396e-05	M2	1.3086798	Pumilio-family RNA binding repeat-containing protein
TGME49_230510	2.4766715	1.3084025	0.020674807410392838	0.02654151563500378	M2	1.3084025	hypothetical protein
TGME49_203730	2.4762735	1.3081707	3.425550731264418e-07	1.2220062992788346e-06	M2	1.3081707	hypothetical protein
TGME49_229370	2.475751	1.3078662	1.0264589722588406e-05	2.669930678534768e-05	M2	1.3078662	AP2 domain transcription factor AP2VIII-1
TGME49_258020	2.475421	1.3076739	0.00018043214530109354	0.0003593759273956025	M2	1.3076739	hypothetical protein
TGME49_270290	2.4753408	1.3076272	0.009114492794678871	0.012565510376481426	M2	1.3076272	hypothetical protein
TGME49_251830	2.474698	1.3072525	4.6501248971634935e-05	0.00010566874295759259	M2	1.3072525	hypothetical protein
TGME49_309240	2.4735587	1.3065882	4.438694612203284e-08	1.8812140505381122e-07	M2	1.3065882	CorA family Mg2+ transporter protein
TGME49_207600	2.473497	1.3065522	0.0051229719677641635	0.007429935833117375	M2	1.3065522	tubulin/FtsZ family GTPase domain-containing protein
TGME49_264745	2.4718256	1.305577	0.006415672848063585	0.009127752733835919	M2	1.305577	hypothetical protein
TGME49_230230	2.4716043	1.3054478	9.754613629367373e-05	0.00020578192656461224	M2	1.3054478	hypothetical protein
TGME49_310100	2.4714255	1.3053434	0.00186819676405538	0.002968809863300492	M2	1.3053434	mannosyltransferase (pig-m) protein
TGME49_259410	2.471232	1.3052304	0.028873112182546797	0.036106343748846255	M2	1.3052304	SAG-related sequence SRS26A
TGME49_232970	2.4709413	1.3050607	8.643039827040041e-05	0.00018487048741664232	M2	1.3050607	hypothetical protein
TGME49_242750	2.4708068	1.3049822	2.412345151721658e-09	1.2733746956402081e-08	M2	1.3049822	hypothetical protein
TGME49_264840	2.469381	1.3041495	1.5167713760498656e-13	1.4070510317230972e-12	M2	1.3041495	ATP-dependent DNA helicase RecQ family protein
TGME49_294710	2.4689388	1.3038911	0.0026389422649190355	0.0040570676879808565	M2	1.3038911	RNA recognition motif-containing protein
TGME49_253925	2.4688666	1.3038489	0.0030497200678555277	0.004623822083503241	M2	1.3038489	zonadhesin family protein
TGME49_240370	2.4680622	1.3033787	6.633014853456227e-08	2.722467631207313e-07	M2	1.3033787	Toxoplasma gondii family E protein
TGME49_273990	2.4673667	1.3029721	0.010721154302994659	0.014594793011373688	M2	1.3029721	CobW/P47K family protein
TGME49_281490	2.4663177	1.3023586	0.0039634145040110995	0.005882475583666631	M2	1.3023586	glutamine amidotransferase subunit pdxt putative
TGME49_216710	2.4661047	1.302234	2.5018792859273403e-05	6.0203251268143376e-05	M2	1.302234	transporter major facilitator family protein
TGME49_222305	2.4644237	1.3012502	0.00038459583493003836	0.0007138632552149691	M2	1.3012502	hypothetical protein
TGME49_207965	2.463648	1.3007962	7.982583556501464e-10	4.579824415206645e-09	M2	1.3007962	hypothetical protein
TGME49_242670	2.4636364	1.3007894	6.736496314489085e-08	2.756907038922386e-07	M2	1.3007894	hypothetical protein
TGME49_243170	2.4626176	1.3001926	0.004724502761949402	0.006901775772037061	M2	1.3001926	Toxoplasma gondii family A protein
TGME49_293390	2.4622777	1.2999935	0.00031835289953368917	0.0006006698713907585	M2	1.2999935	cytochrome C-type heme lyase putative
TGME49_225110	2.4622145	1.2999564	7.777606841321814e-08	3.129931210286222e-07	M2	1.2999564	AP2 domain transcription factor AP2X-2
TGME49_208980	2.461563	1.2995747	0.008723458051211656	0.012077644821557947	M2	1.2995747	hypothetical protein
TGME49_242020	2.461529	1.2995547	2.7663030910385392e-05	6.605828601968549e-05	M2	1.2995547	mannosyl-oligosaccharide glucosidase
TGME49_288870	2.4611824	1.2993516	0.004320633069141807	0.006356836710883949	M2	1.2993516	hypothetical protein
TGME49_232320	2.461108	1.299308	9.307542762560855e-09	4.4565463958301294e-08	M2	1.299308	hypothetical protein
TGME49_214090	2.4607766	1.2991136	8.001895363462504e-10	4.587789533013678e-09	M2	1.2991136	signal peptidase
TGME49_311810	2.4602032	1.2987775	4.998110097362243e-05	0.00011308976822706376	M2	1.2987775	hypothetical protein
TGME49_254810	2.459887	1.2985921	0.00018215290008105116	0.00036212047955421395	M2	1.2985921	hypothetical protein
TGME49_313665	2.4582944	1.2976577	0.00340354010283722	0.0051125697492138905	M2	1.2976577	hypothetical protein
TGME49_231610	2.4566529	1.296694	5.104657612631507e-07	1.762232903772421e-06	M2	1.296694	ATP:guanido phosphotransferase C-terminal catalytic domain-containing protein
TGME49_234340	2.4559917	1.2963057	0.005573338583121729	0.008026633327532673	M2	1.2963057	hypothetical protein
TGME49_318220	2.4558985	1.2962509	0.013034891372128921	0.017449369077437275	M2	1.2962509	hypothetical protein
TGME49_221940	2.4557402	1.296158	9.029531134504263e-06	2.383153267260947e-05	M2	1.296158	adaptin n terminal region domain-containing protein
TGME49_248270	2.4533572	1.2947574	0.009409182605133858	0.012923289809196528	M2	1.2947574	zinc finger (CCCH type) motif-containing protein
TGME49_260660	2.4532604	1.2947004	0.0002825817466670924	0.0005387093031995484	M2	1.2947004	50S ribosomal protein L23 putative
TGME49_304640	2.4531226	1.2946193	0.00020135661186206565	0.00039610445224541824	M2	1.2946193	hypothetical protein
TGME49_248890	2.453062	1.2945838	0.030519261857689377	0.037962655572465843	M2	1.2945838	actin-like protein ALP3b
TGME49_290260	2.4518735	1.2938845	0.002086202629472669	0.003283758320296801	M2	1.2938845	thioredoxin family Trp26 protein
TGME49_202375	2.4492908	1.292364	5.502455716231319e-06	1.522634356839256e-05	M2	1.292364	hypothetical protein
TGME49_268250	2.4489355	1.2921548	0.0002925295444897859	0.0005564184516054874	M2	1.2921548	WD domain G-beta repeat-containing protein
TGME49_258350	2.4487512	1.2920462	0.00011275904074845394	0.00023401931565942638	M2	1.2920462	hypothetical protein
TGME49_227400	2.4482112	1.291728	0.004136978911714106	0.006105764719332153	M2	1.291728	hypothetical protein
TGME49_288230	2.446159	1.2905182	1.6467500128750214e-08	7.551103830063378e-08	M2	1.2905182	hypothetical protein
TGME49_219860	2.4456282	1.290205	6.505312850296725e-10	3.78364754974932e-09	M2	1.290205	replication licensing factor putative
TGME49_268400	2.4450119	1.2898414	3.6334924728844933e-10	2.193331777739061e-09	M2	1.2898414	hypothetical protein
TGME49_216785	2.4448183	1.2897272	0.024752165634123004	0.03139434965840815	M2	1.2897272	hypothetical protein
TGME49_275400	2.4445689	1.2895801	3.836807872790047e-09	1.9627641242705013e-08	M2	1.2895801	hypothetical protein
TGME49_311080	2.444371	1.2894633	5.935192099927129e-07	2.0184429954319582e-06	M2	1.2894633	transporter cation channel family protein
TGME49_268225	2.443372	1.2888736	0.0046199938255988655	0.006761961867013511	M2	1.2888736	hypothetical protein
TGME49_279550	2.4428675	1.2885756	7.528009543033767e-06	2.0222253225740104e-05	M2	1.2885756	hypothetical protein
TGME49_207100	2.4426494	1.2884468	6.6649857650875295e-06	1.8157896421906742e-05	M2	1.2884468	hypothetical protein
TGME49_271300	2.4416173	1.287837	0.009020065617415807	0.012449546714483256	M2	1.287837	DNA-directed RNA polymerase II RPB7
TGME49_213255	2.4404013	1.2871184	1.1985214265873145e-08	5.6333173393155694e-08	M2	1.2871184	hypothetical protein
TGME49_312410	2.4403722	1.2871013	0.0009285515660111231	0.0015782762036122286	M2	1.2871013	hypothetical protein
TGME49_240340	2.438696	1.2861099	2.761364844455777e-05	6.595900028404684e-05	M2	1.2861099	Toxoplasma gondii family E protein
TGME49_297220	2.4386454	1.28608	3.650358839982436e-06	1.0514377149519961e-05	M2	1.28608	AMP-binding enzyme domain-containing protein
TGME49_311660	2.437768	1.2855608	7.43617265878413e-08	3.011168909409904e-07	M2	1.2855608	histone lysine methyltransferase SET putative
TGME49_269480	2.4376667	1.2855009	4.121596655779678e-06	1.1751556456813109e-05	M2	1.2855009	adaptor complexes medium subunit family protein
TGME49_238450	2.4357553	1.2843692	0.008167302894043082	0.011380358904791112	M2	1.2843692	hypothetical protein
TGME49_212880	2.4347942	1.2837999	5.871856052684535e-17	7.473351732114006e-16	M2	1.2837999	surface antigen repeat-containing protein
TGME49_293300	2.4344926	1.2836211	7.780070011785966e-05	0.0001680709909754683	M2	1.2836211	Yip1 domain-containing protein
TGME49_233735	2.430045	1.280983	2.5643963612897445e-15	2.7963501482915654e-14	M2	1.280983	hypothetical protein
TGME49_243280	2.4298332	1.2808573	0.0024876245737490447	0.0038440144949265275	M2	1.2808573	Met-10+ like-protein
TGME49_238080	2.429399	1.2805995	2.077177845417333e-05	5.076411212152077e-05	M2	1.2805995	hypothetical protein
TGME49_231020	2.4277937	1.2796459	0.000488474048995808	0.0008875713154297084	M2	1.2796459	hypothetical protein
TGME49_313990	2.4274986	1.2794704	4.94191126336535e-07	1.7102412811916699e-06	M2	1.2794704	CBF/Mak21 family protein
TGME49_216750	2.42734	1.2793763	3.182322728200843e-08	1.3848511522155164e-07	M2	1.2793763	Paf1/RNA polymerase II complex component LEO1
TGME49_272890	2.4271061	1.2792373	0.0031873828587241425	0.004812680460796449	M2	1.2792373	RNA recognition motif-containing protein
TGME49_222800	2.426607	1.2789404	3.4077204286440955e-16	4.056147231333979e-15	M2	1.2789404	glycogen synthase putative
TGME49_312445	2.42654	1.2789006	0.028296335746494504	0.03542701235461112	M2	1.2789006	hypothetical protein
TGME49_264225	2.4261909	1.2786931	0.0005217086611035913	0.0009396760219493714	M2	1.2786931	Toxoplasma gondii family B protein
TGME49_313980	2.4261117	1.278646	0.00010886351874819536	0.00022688177483131913	M2	1.278646	ribosome biogenesis protein nep1 putative
TGME49_229160	2.4230895	1.2768477	0.02011697971042691	0.02590804564657388	M2	1.2768477	DHHC zinc finger domain-containing protein
TGME49_217020	2.4223874	1.2764297	1.9100153802201516e-08	8.622617509743859e-08	M2	1.2764297	ATPase AFG1 family protein
TGME49_213890	2.4221573	1.2762926	5.2196819238798546e-06	1.4519924930450509e-05	M2	1.2762926	Myb family DNA-binding domain-containing protein
TGME49_203150	2.4219034	1.2761413	5.903504732004771e-05	0.0001310838636105421	M2	1.2761413	hypothetical protein
TGME49_202980	2.4218187	1.2760909	5.04424136533423e-13	4.449779100045885e-12	M2	1.2760909	hypothetical protein
TGME49_254830	2.4218006	1.2760801	0.0011317927762937853	0.001882830856783224	M2	1.2760801	hypothetical protein
TGME49_307860	2.4205422	1.2753303	5.040207391763978e-13	4.450866527460541e-12	M2	1.2753303	hypothetical protein
TGME49_216950	2.4201965	1.2751242	1.7010841431688024e-08	7.774938936679041e-08	M2	1.2751242	helicase
TGME49_209650	2.4195766	1.2747546	5.615448216099358e-12	4.4310133402666364e-11	M2	1.2747546	RNA-directed DNA polymerase
TGME49_238870	2.418651	1.2742027	0.0017128885918859767	0.002743153589165888	M2	1.2742027	hypothetical protein
TGME49_263730	2.4166548	1.2730114	0.0023070878858100115	0.0035926293943210627	M2	1.2730114	FAD-dependent glycerol-3-phosphate dehydrogenase
TGME49_239120	2.4161334	1.2727001	0.02095302576493623	0.026886428900618903	M2	1.2727001	hypothetical protein
TGME49_264460	2.4153676	1.2722428	1.7183027274421987e-05	4.2760236600748e-05	M2	1.2722428	DNA-directed RNA polymerase III RPC5
TGME49_312360	2.4138074	1.2713106	1.641375050098174e-05	4.1014963182672e-05	M2	1.2713106	hypothetical protein
TGME49_207740	2.4132109	1.270954	1.396326854824503e-05	3.538338305883621e-05	M2	1.270954	hypothetical protein
TGME49_290923	2.4126136	1.2705969	0.007851551161250447	0.010976585419971468	M2	1.2705969	hypothetical protein
TGME49_258810	2.4119775	1.2702165	0.01329076535994015	0.017763760565689422	M2	1.2702165	SAG-related sequence SRS27B
TGME49_313870	2.4107492	1.2694815	1.4521319482359706e-06	4.550228807764993e-06	M2	1.2694815	zinc finger C3HC4 type (RING finger) domain-containing protein
TGME49_271888	2.4100492	1.2690626	0.007218066982170356	0.010183620044461049	M2	1.2690626	3-ketoacyl-CoA reductase putative
TGME49_211480	2.410027	1.2690493	0.00013348382957522099	0.000272942618858019	M2	1.2690493	GTP-binding protein engA putative
TGME49_217930	2.4099352	1.2689943	0.010507898663126838	0.014325254331680096	M2	1.2689943	hypothetical protein
TGME49_289790	2.4082093	1.2679608	0.0010130311221541416	0.0017047244152378833	M2	1.2679608	hypothetical protein
TGME49_221560	2.4078052	1.2677187	0.0024552089469486622	0.003800177804150759	M2	1.2677187	hypothetical protein
TGME49_313250	2.4075253	1.267551	9.16808177835896e-05	0.00019472093266879008	M2	1.267551	hypothetical protein
TGME49_216980	2.4066217	1.2670094	0.0006591209689946889	0.0011609485846131961	M2	1.2670094	WDR8 protein isoform 3 family protein
TGME49_212960	2.4057066	1.2664607	0.0002459512672141003	0.00047552829083192903	M2	1.2664607	hypothetical protein
TGME49_254840	2.405518	1.2663476	3.036240308625533e-11	2.1598709468177085e-10	M2	1.2663476	tetratricopeptide repeat-containing protein
TGME49_320680	2.4039726	1.2654204	1.539620657456463e-06	4.79945930511419e-06	M2	1.2654204	AP2 domain transcription factor AP2IV-2
TGME49_230500	2.4036908	1.2652514	8.946065690020565e-07	2.9246886323544985e-06	M2	1.2652514	hypothetical protein
TGME49_213700	2.4035494	1.2651665	0.011377427590328918	0.01541864024468725	M2	1.2651665	hypothetical protein
TGME49_208040	2.4020019	1.2642373	6.279292105520712e-07	2.116725073145414e-06	M2	1.2642373	aldo-keto reductase
TGME49_240280	2.4016984	1.264055	6.512226727589551e-07	2.1891339727469885e-06	M2	1.264055	S1/P1nuclease
TGME49_251670	2.4015868	1.2639879	4.880087464409542e-06	1.3660688692191135e-05	M2	1.2639879	werner helicase interacting protein 1 putative
TGME49_294380	2.4012275	1.263772	2.6041622595620673e-06	7.776599030232874e-06	M2	1.263772	PP-loop domain-containing protein
TGME49_203020	2.4011006	1.2636958	5.548585108269532e-10	3.2631240605418104e-09	M2	1.2636958	ribosome biogenesis GTPase Der protein
TGME49_246910	2.400151	1.2631252	2.47380982837694e-06	7.416164192839134e-06	M2	1.2631252	histone lysine methyltransferase SET putative
TGME49_205520	2.3992922	1.2626089	0.010715273864709074	0.014591488789986526	M2	1.2626089	hypothetical protein
TGME49_227780	2.3977637	1.2616895	8.437384391197883e-15	8.868698444031506e-14	M2	1.2616895	hypothetical protein
TGME49_270150	2.396386	1.2608602	5.9132651381536765e-05	0.00013119717427812212	M2	1.2608602	hypothetical protein
TGME49_240790	2.3962233	1.2607623	0.03436445381621024	0.04226662773989125	M2	1.2607623	hypothetical protein
TGME49_203750	2.396213	1.2607563	1.1840962373742926e-11	8.958636796821975e-11	M2	1.2607563	hypothetical protein
TGME49_227100	2.3956156	1.2603965	0.0006858075321759797	0.0012039383993392614	M2	1.2603965	hypothetical protein
TGME49_203200	2.3953884	1.2602596	2.2735399557811638e-08	1.0128458706540123e-07	M2	1.2602596	hypothetical protein
TGME49_233540	2.3947232	1.2598588	9.116994729544597e-07	2.975964560037906e-06	M2	1.2598588	transporter major facilitator family protein
TGME49_207800	2.3946893	1.2598385	1.1292695564764264e-06	3.6135770623938958e-06	M2	1.2598385	hypothetical protein
TGME49_227300	2.3939123	1.2593703	3.3856071320714326e-07	1.2097998255025656e-06	M2	1.2593703	hypothetical protein
TGME49_235635	2.3934627	1.2590992	0.0007373098488022182	0.0012855385872142658	M2	1.2590992	hypothetical protein
TGME49_318510	2.3927722	1.2586831	2.9640563362303592e-06	8.755414224915333e-06	M2	1.2586831	N-ethylmaleimide-sensitive fusion protein putative
TGME49_206610	2.3926744	1.2586241	1.35910694107689e-09	7.458319973403115e-09	M2	1.2586241	pyruvate dehydrogenase complex subunit PDH-E2
TGME49_290840	2.3923256	1.2584138	0.00019272453069661875	0.0003809859669981579	M2	1.2584138	serine protease
TGME49_228660	2.3916912	1.2580311	7.179471655640463e-12	5.5715073426829715e-11	M2	1.2580311	Sec7 domain-containing protein
TGME49_278878	2.3904586	1.2572874	5.558489805340258e-05	0.00012433773781082722	M2	1.2572874	GDA1/CD39 (nucleoside phosphatase) family protein
TGME49_288250	2.3891747	1.2565124	0.0015750306376278163	0.0025372824854351266	M2	1.2565124	hypothetical protein
TGME49_228420	2.3889763	1.2563925	4.3880645275088916e-05	0.00010022576573507471	M2	1.2563925	protein kinase cAMP-dependent catalytic chain
TGME49_235590	2.3886175	1.2561759	0.03791717792523083	0.04629938891000228	M2	1.2561759	hypothetical protein
TGME49_293800	2.3886046	1.2561681	0.014940690371326105	0.0197874587569467	M2	1.2561681	transmembrane protein 65 putative
TGME49_230880	2.3885288	1.2561224	0.027767724359158866	0.034858145953543015	M2	1.2561224	hypothetical protein
TGME49_282040	2.3880796	1.255851	2.508109286989061e-11	1.8178414737859823e-10	M2	1.255851	hypothetical protein
TGME49_216630	2.38792	1.2557545	4.643033991136948e-09	2.3439832890739754e-08	M2	1.2557545	trigger factor protein putative
TGME49_309250	2.3872662	1.2553594	1.597678556872157e-07	6.076499317788748e-07	M2	1.2553594	hypothetical protein
TGME49_216875	2.3872066	1.2553234	0.0004022840563580976	0.0007427796723360897	M2	1.2553234	cpw-wpc domain-containing protein
TGME49_311740	2.3864207	1.2548485	0.013426026720324113	0.017927532282107615	M2	1.2548485	hypothetical protein
TGME49_313852	2.3852456	1.2541378	9.49280004100772e-09	4.5401048753002966e-08	M2	1.2541378	hypothetical protein
TGME49_217692	2.3850322	1.2540088	7.631966331760992e-06	2.044950775831076e-05	M2	1.2540088	hypothetical protein
TGME49_205760	2.384427	1.2536427	2.8943063220030814e-05	6.876520305664335e-05	M2	1.2536427	membrane protein
TGME49_205190	2.3839753	1.2533693	2.597649775465492e-07	9.478729815396751e-07	M2	1.2533693	hypothetical protein
TGME49_312680	2.3838854	1.2533149	0.001364921141330327	0.002226824047371157	M2	1.2533149	60S ribosomal protein L27 putative
TGME49_203260	2.383602	1.2531433	4.539690627037499e-10	2.6979553789798805e-09	M2	1.2531433	hypothetical protein
TGME49_245570	2.3829682	1.2527597	2.3061598902913866e-06	6.945601294673024e-06	M2	1.2527597	origin recognition complex subunit 2 protein
TGME49_239660	2.3822873	1.2523474	0.02694948545077251	0.033941892927642096	M2	1.2523474	hypothetical protein
TGME49_269150	2.3820698	1.2522156	0.00033868128687055164	0.000635619710269383	M2	1.2522156	DHHC zinc finger domain-containing protein
TGME49_213300	2.3816597	1.2519673	5.915259181618471e-12	4.6545489146981093e-11	M2	1.2519673	hypothetical protein
TGME49_311240	2.381637	1.2519536	2.8053393806676197e-06	8.304001087923661e-06	M2	1.2519536	DnaJ family chaperone putative
TGME49_258570	2.3805277	1.2512815	6.07650570650712e-06	1.6689161431813998e-05	M2	1.2512815	hypothetical protein
TGME49_276880	2.3801792	1.2510701	0.0033582940486497773	0.005052687022456697	M2	1.2510701	hypothetical protein
TGME49_244510	2.3795884	1.250712	0.0003726535642316794	0.0006932192981118034	M2	1.250712	AP2 domain transcription factor AP2VI-3
TGME49_209010	2.3794036	1.2506	0.007865630672899374	0.010994450019297487	M2	1.2506	elongation factor TS protein
TGME49_202910	2.3793845	1.2505884	0.0017151066936653234	0.0027461854240556365	M2	1.2505884	zinc carboxypeptidase superfamily protein
TGME49_285690	2.378828	1.250251	0.005674653247140149	0.00815864147526053	M2	1.250251	notch (dsl) domain-containing protein
TGME49_213115	2.378698	1.2501721	0.0001518343781427008	0.0003065342402493943	M2	1.2501721	hypothetical protein
TGME49_241610	2.3780527	1.2497807	0.010468622862795141	0.014276316251973816	M2	1.2497807	hypothetical protein
TGME49_212410	2.3772993	1.2493236	0.00041763112282390487	0.0007691001566757071	M2	1.2493236	dense granule protein GRA11
TGME49_261955	2.3771412	1.2492276	1.222328372651762e-14	1.252108736640005e-13	M2	1.2492276	hypothetical protein
TGME49_267308	2.377073	1.2491863	6.437459996104146e-05	0.00014174823977872888	M2	1.2491863	myosin heavy chain putative
TGME49_275980	2.3762312	1.2486752	0.003386032299712918	0.005088079474550831	M2	1.2486752	coenzyme q (ubiquinone) biosynthesis protein coq4 protein
TGME49_260360	2.375192	1.2480441	3.269937902681114e-06	9.538917920454985e-06	M2	1.2480441	GTP-binding protein
TGME49_215260	2.37512	1.2480004	5.2668496369035074e-17	6.733758892809612e-16	M2	1.2480004	carbamoylphosphate synthetase
TGME49_247320	2.3749702	1.2479094	1.3063349371531277e-09	7.178047174174956e-09	M2	1.2479094	hypothetical protein
TGME49_245600	2.3744574	1.2475978	0.03980796338500105	0.048433213153850255	M2	1.2475978	hypothetical protein
TGME49_225108	2.374432	1.2475824	0.0010051624622141177	0.0016945198420449848	M2	1.2475824	SNF7 family protein
TGME49_240350	2.3740094	1.2473257	0.0047380848123405525	0.006918029500533865	M2	1.2473257	Toxoplasma gondii family E protein
TGME49_257990	2.3732436	1.2468601	2.219633970328493e-07	8.223641684895264e-07	M2	1.2468601	heat shock protein 101 putative
TGME49_257000	2.372637	1.2464914	0.0001613362855259583	0.00032386055795246405	M2	1.2464914	hypothetical protein
TGME49_269100	2.3725357	1.2464298	3.085068217292675e-05	7.280623151170176e-05	M2	1.2464298	hypothetical protein
TGME49_289590	2.3722403	1.2462502	0.00015801557819333098	0.00031779858431980966	M2	1.2462502	hypothetical protein
TGME49_265840	2.3714383	1.2457623	8.265732303860253e-09	4.019200443033544e-08	M2	1.2457623	hypothetical protein
TGME49_244050	2.3713365	1.2457004	1.6553806404980074e-06	5.120652193575644e-06	M2	1.2457004	hypothetical protein
TGME49_289870	2.3712506	1.2456481	0.002025914396123567	0.0031983939027910076	M2	1.2456481	hypothetical protein
TGME49_252290	2.3709047	1.2454376	0.0001686757673575744	0.0003373116209036586	M2	1.2454376	importin alpha putative
TGME49_251820	2.3706632	1.2452906	9.496778116092211e-05	0.00020099492075906653	M2	1.2452906	hypothetical protein
TGME49_242415	2.3706543	1.2452853	3.744413067768909e-09	1.9201477448856216e-08	M2	1.2452853	histone lysine-specific demethylase
TGME49_283460	2.3701353	1.2449694	0.0001359859697159212	0.00027765581784712495	M2	1.2449694	SAG-related sequence SRS21
TGME49_233090	2.368833	1.2441765	0.0002722977220775292	0.0005209843896937285	M2	1.2441765	XPG N-terminal domain-containing protein
TGME49_312960	2.3678045	1.24355	0.00011549805211453195	0.0002391752115706713	M2	1.24355	hypothetical protein
TGME49_313660	2.3674445	1.2433306	7.026092313121449e-06	1.901297026519032e-05	M2	1.2433306	hypothetical protein
TGME49_306680	2.3664417	1.2427194	2.395611512080715e-07	8.809970795732864e-07	M2	1.2427194	hypothetical protein
TGME49_228310	2.3659246	1.2424041	0.025613739992545223	0.03240930029600235	M2	1.2424041	hypothetical protein
TGME49_223150	2.365047	1.2418689	4.703606912351994e-08	1.982552719016793e-07	M2	1.2418689	START domain-containing protein
TGME49_314482	2.3649235	1.2417935	0.0014407954876224942	0.0023375240287766747	M2	1.2417935	hypothetical protein
TGME49_253900	2.3638422	1.2411337	0.0012140690384109512	0.0020043167500705117	M2	1.2411337	parasite porphobilinogen synthase PBGS
TGME49_262590	2.3637202	1.2410593	0.01049040026672055	0.014303706462416164	M2	1.2410593	hypothetical protein
TGME49_202740	2.3627748	1.2404821	6.707817844746512e-06	1.82510523522063e-05	M2	1.2404821	hypothetical protein
TGME49_299250	2.3627706	1.2404795	0.0386707397365901	0.0471514098274308	M2	1.2404795	hypothetical protein
TGME49_220520	2.3622963	1.2401899	4.529847467818582e-08	1.9169624912636374e-07	M2	1.2401899	hypothetical protein
TGME49_230570	2.3621004	1.2400702	4.614170318300796e-09	2.333593857567925e-08	M2	1.2400702	transporter major facilitator family protein
TGME49_201120	2.3620234	1.2400233	1.6429239222385403e-06	5.083980251496852e-06	M2	1.2400233	ELMO/CED-12 family protein
TGME49_208810	2.361544	1.2397304	0.00022093047147215422	0.00043069974957581894	M2	1.2397304	hypothetical protein
TGME49_297410	2.3610797	1.2394468	0.0003463169564151307	0.0006490850739996162	M2	1.2394468	hypothetical protein
TGME49_310560	2.360643	1.2391798	8.822153882950409e-10	5.003759896967376e-09	M2	1.2391798	hypothetical protein
TGME49_218358	2.3601	1.238848	4.4929425224016686e-05	0.00010245509243609417	M2	1.238848	zinc knuckle domain-containing protein
TGME49_297730	2.359743	1.2386298	0.0005202489295356458	0.0009376463432513847	M2	1.2386298	transcription elongation factor 1 putative
TGME49_250890	2.3595002	1.2384813	4.8290089138268774e-08	2.029336366521678e-07	M2	1.2384813	3'-5' exonuclease domain-containing protein
TGME49_209920	2.3594358	1.238442	5.102224785722159e-07	1.7621128591801374e-06	M2	1.238442	PAN domain-containing protein
TGME49_269705	2.3590312	1.2381945	2.8954033258476293e-05	6.877193228425608e-05	M2	1.2381945	hypothetical protein
TGME49_209270	2.3588517	1.2380847	1.1548891858795465e-06	3.6913647919319393e-06	M2	1.2380847	hypothetical protein
TGME49_226890	2.358222	1.2376995	8.021884401921316e-06	2.139253552560336e-05	M2	1.2376995	hypothetical protein
TGME49_223480	2.3582003	1.2376863	1.917098962897331e-09	1.028007825853131e-08	M2	1.2376863	sushi domain (scr repeat) domain-containing protein
TGME49_221265	2.3579197	1.2375146	0.0005913607469361979	0.001053232807662341	M2	1.2375146	hypothetical protein
TGME49_314890	2.356987	1.2369438	1.3364718794976033e-07	5.138545884273997e-07	M2	1.2369438	ThiF family protein
TGME49_231150	2.3566751	1.2367529	1.4181079674642587e-07	5.430190499791776e-07	M2	1.2367529	hypothetical protein
TGME49_310885	2.3553946	1.2359688	0.000644800285503884	0.0011390483304333872	M2	1.2359688	hypothetical protein
TGME49_208330	2.3547902	1.2355986	9.295622029952679e-06	2.4457441399480104e-05	M2	1.2355986	hypothetical protein
TGME49_228290	2.354236	1.2352588	0.0009741540623262212	0.0016481633595032824	M2	1.2352588	phospholipase/carboxylesterase
TGME49_255370	2.353643	1.2348955	0.0022363341158473495	0.003494039492147523	M2	1.2348955	TIC20
TGME49_270805	2.351575	1.2336273	0.00036066569455653054	0.0006732904317864457	M2	1.2336273	hypothetical protein
TGME49_230990	2.3515363	1.2336036	9.489019837467104e-07	3.079558626975211e-06	M2	1.2336036	hypothetical protein
TGME49_290225	2.3514051	1.2335231	1.9524827609121834e-06	5.954684883604786e-06	M2	1.2335231	hypothetical protein
TGME49_201180	2.3510916	1.2333307	1.0906300308658695e-05	2.8186282540817932e-05	M2	1.2333307	hypothetical protein
TGME49_257290	2.3500595	1.2326972	2.844566224570568e-06	8.414220918391974e-06	M2	1.2326972	RNA 2'-phosphotransferase Tpt1/KptA family protein
TGME49_311490	2.3492188	1.2321811	5.849390763466732e-07	1.9932742476636028e-06	M2	1.2321811	hypothetical protein
TGME49_239430	2.34916	1.232145	0.004267948907252736	0.00628808162747435	M2	1.232145	EF hand domain-containing protein
TGME49_311155	2.3484447	1.2317057	0.0024473383820951713	0.0037907728495392766	M2	1.2317057	hypothetical protein
TGME49_329710	2.347065	1.2308577	1.1582950102132334e-06	3.6980548286029602e-06	M2	1.2308577	SAG-related sequence SRS26I
TGME49_212910	2.346728	1.2306507	0.0064946787846930955	0.00923393849418596	M2	1.2306507	rhomboid protease ROM3
TGME49_216285	2.3466685	1.2306141	8.533451319213139e-07	2.8049862737716935e-06	M2	1.2306141	hypothetical protein
TGME49_237140	2.3458188	1.2300916	0.00732768565274898	0.010315887298247815	M2	1.2300916	ethylene inducible protein putative
TGME49_299570	2.3458178	1.230091	0.003997764764311603	0.005928252329039718	M2	1.230091	Toxoplasma gondii family B protein
TGME49_223550	2.3456008	1.2299576	0.0021278322248779336	0.003344301679829536	M2	1.2299576	hypothetical protein
TGME49_264200	2.3452647	1.2297508	1.5501164588395104e-06	4.830396089104979e-06	M2	1.2297508	hypothetical protein
TGME49_238190	2.3449845	1.2295784	0.005029304463025813	0.0073053716082899876	M2	1.2295784	DNA-directed RNA polymerase II RPB3
TGME49_217050	2.3441916	1.2290905	4.0034300417558065e-07	1.4067770179990986e-06	M2	1.2290905	ADA2-A transcriptional co-activator SAGA component
TGME49_254860	2.3435261	1.2286808	4.765683552618919e-14	4.634613544670022e-13	M2	1.2286808	hypothetical protein
TGME49_255390	2.3426695	1.2281535	1.6969685520143398e-10	1.0831632351263736e-09	M2	1.2281535	HEAT repeat-containing protein
TGME49_314370	2.3425968	1.2281086	8.737338679156444e-05	0.0001866984808534794	M2	1.2281086	hypothetical protein
TGME49_267820	2.3421242	1.2278175	1.1685977919019732e-08	5.5018495483919636e-08	M2	1.2278175	electron transfer flavoprotein subunit beta putative
TGME49_229750	2.3418996	1.2276793	4.466363732927934e-06	1.262804948376513e-05	M2	1.2276793	hypothetical protein
TGME49_222340	2.3403082	1.2266985	0.012427327541712397	0.01671015832219753	M2	1.2266985	NOL1/NOP2/sun family protein
TGME49_244090	2.3400698	1.2265515	0.0008267333320678491	0.0014215103538769874	M2	1.2265515	hypothetical protein
TGME49_243510	2.339217	1.2260257	0.0010206911154745134	0.0017162476356695408	M2	1.2260257	OTU family cysteine protease
TGME49_204100	2.3389983	1.2258909	7.3556664427558225e-06	1.9809667657020222e-05	M2	1.2258909	eIF2 kinase IF2K-C
TGME49_246475	2.3389199	1.2258425	3.7833614930241777e-06	1.0860457872808195e-05	M2	1.2258425	hypothetical protein
TGME49_231350	2.3388877	1.2258226	0.011596113326510386	0.01569486766853608	M2	1.2258226	glucosamine-fructose-6-phosphate aminotransferase
TGME49_217860	2.3388383	1.2257922	0.0008421358573922968	0.0014456408959622792	M2	1.2257922	hypothetical protein
TGME49_216280	2.3379452	1.2252412	5.170947454588748e-05	0.00011643932038030777	M2	1.2252412	adenylate and guanylate cyclase catalytic domain-containing protein
TGME49_308040	2.3379176	1.225224	0.0001808232715153246	0.0003600700913232818	M2	1.225224	ZPR1 zinc finger domain-containing protein
TGME49_273360	2.3369637	1.2246352	4.124453481047774e-06	1.1747811381305943e-05	M2	1.2246352	ABC transporter transmembrane region domain-containing protein
TGME49_253810	2.3363383	1.2242491	1.8925603743023496e-06	5.788645574820542e-06	M2	1.2242491	hypothetical protein
TGME49_228010	2.3357494	1.2238855	0.0005914266037554667	0.0010531281559918771	M2	1.2238855	hypothetical protein
TGME49_263510	2.3355234	1.2237458	6.590581797543078e-06	1.7972573982264133e-05	M2	1.2237458	Spc97 / Spc98 family protein
TGME49_247980	2.3335335	1.2225162	0.00047404135120635596	0.0008635747917751487	M2	1.2225162	hypothetical protein
TGME49_242640	2.3326676	1.2219807	2.051886773631515e-06	6.230864219892179e-06	M2	1.2219807	hypothetical protein
TGME49_271090	2.3326242	1.2219539	4.94246677139389e-07	1.7097333886635187e-06	M2	1.2219539	hypothetical protein
TGME49_307090	2.3324475	1.2218447	1.1226395381676134e-10	7.371737946429293e-10	M2	1.2218447	hypothetical protein
TGME49_265220	2.332212	1.2216989	5.550004431735082e-05	0.0001242136849909777	M2	1.2216989	co-chaperone GrpE protein
TGME49_278910	2.3316593	1.221357	2.1159021394925874e-08	9.481171251777229e-08	M2	1.221357	O-acetylserine (thiol) lyase 2 putative
TGME49_213445	2.331263	1.2211118	6.303681655892289e-07	2.1240994287857147e-06	M2	1.2211118	hypothetical protein
TGME49_306035	2.3310206	1.2209617	0.017531492855868865	0.022839316498373327	M2	1.2209617	hypothetical protein
TGME49_231880	2.3309758	1.220934	0.0013398272660578292	0.002188842108148988	M2	1.220934	hypothetical protein
TGME49_224845	2.3302524	1.2204862	0.00035247054808362023	0.0006594484396401759	M2	1.2204862	hypothetical protein
TGME49_221720	2.330204	1.2204562	1.53019655150618e-05	3.844141217829586e-05	M2	1.2204562	hypothetical protein
TGME49_235170	2.33018	1.2204413	7.64230481206674e-11	5.129874342079112e-10	M2	1.2204413	ATPase AAA family protein
TGME49_207690	2.3299818	1.2203187	0.0018573118610154653	0.002954846110211163	M2	1.2203187	programmed cell death 5 protein
TGME49_268710	2.329808	1.220211	5.86813059611469e-06	1.6158869881969777e-05	M2	1.220211	elongation factor Tu GTP binding domain-containing protein
TGME49_284602	2.3296845	1.2201346	2.1595463065286077e-06	6.53430928624177e-06	M2	1.2201346	E1-E2 ATPase subfamily protein
TGME49_237550	2.329303	1.2198983	2.42605873941634e-09	1.2790157459019022e-08	M2	1.2198983	hypothetical protein
TGME49_230010	2.3288865	1.2196404	2.193729495453159e-06	6.621145702169517e-06	M2	1.2196404	hypothetical protein
TGME49_202160	2.3286533	1.2194959	1.7948732630568806e-05	4.4560734271720615e-05	M2	1.2194959	ABC1 family protein
TGME49_221415	2.3276699	1.2188865	0.0049393981898865616	0.007183420083071989	M2	1.2188865	hypothetical protein
TGME49_320460	2.326745	1.2183131	1.8785589431225527e-08	8.489680015149033e-08	M2	1.2183131	ABC transporter transmembrane region domain-containing protein
TGME49_248800	2.3262746	1.2180214	0.0020129082107532897	0.0031808315798571526	M2	1.2180214	hypothetical protein
TGME49_233153	2.3261478	1.2179427	4.462747582349189e-09	2.259717185046914e-08	M2	1.2179427	hypothetical protein
TGME49_282020	2.3260465	1.2178799	0.00010968055086447541	0.00022841555824437695	M2	1.2178799	hypothetical protein
TGME49_288930	2.3257172	1.2176757	5.423208008149594e-13	4.7691499351584e-12	M2	1.2176757	hypothetical protein
TGME49_316750	2.3256803	1.2176528	7.326916970221633e-19	1.0863118476375968e-17	M2	1.2176528	DEAD/DEAH box helicase domain-containing protein
TGME49_316480	2.325064	1.2172704	7.523945538367989e-08	3.040883010270104e-07	M2	1.2172704	XRN 5'-3' exonuclease N-terminus protein
TGME49_312520	2.3248417	1.2171326	1.2860989965387693e-09	7.08066620179097e-09	M2	1.2171326	tRNA dimethylallyltransferase
TGME49_293890	2.3244543	1.2168921	1.547145976942643e-08	7.136970879444474e-08	M2	1.2168921	intraflagellar transport 80 family protein
TGME49_311730	2.3237615	1.216462	2.5734589171014637e-05	6.178494689893315e-05	M2	1.216462	hypothetical protein
TGME49_236840	2.3210337	1.2147675	7.381622495210598e-08	2.9905125458784644e-07	M2	1.2147675	zinc finger (C-x8-C-x5-C-x3-H)-2 putative
TGME49_274020	2.3203993	1.2143731	4.6603191146616225e-07	1.6194225673521947e-06	M2	1.2143731	kinesin motor domain-containing protein
TGME49_311700	2.3203726	1.2143564	0.0001267004821371707	0.0002602687833109455	M2	1.2143564	hypothetical protein
TGME49_272360	2.3199654	1.2141032	4.598992823014041e-06	1.2959682676656105e-05	M2	1.2141032	EF hand family protein
TGME49_203690	2.3195717	1.2138585	1.4906278721901522e-06	4.6639378555642266e-06	M2	1.2138585	AP2 domain transcription factor AP2VIIa-5
TGME49_274070	2.3189025	1.2134422	0.0003356744679723506	0.0006308171956491739	M2	1.2134422	ThiF family protein
TGME49_321610	2.3180044	1.2128832	0.0007558138452958011	0.0013134655164702476	M2	1.2128832	hypothetical protein
TGME49_293220	2.317809	1.2127618	9.759347371652206e-05	0.00020577905348760677	M2	1.2127618	DHHC zinc finger domain-containing protein
TGME49_289490	2.3176568	1.2126669	1.403820498810541e-08	6.497090380858642e-08	M2	1.2126669	serine/threonine specific protein phosphatase
TGME49_269760	2.3174388	1.2125312	1.7487761445842662e-05	4.345459334866696e-05	M2	1.2125312	'chromo' (CHRromatin Organization MOdifier) domain-containing protein
TGME49_211690	2.3172934	1.2124407	1.445555250771481e-08	6.679271418408849e-08	M2	1.2124407	AAA family protein
TGME49_288210	2.3171437	1.2123475	0.0008267803013440124	0.001421301937888171	M2	1.2123475	PUL domain-containing protein
TGME49_319620	2.3169858	1.2122493	1.9302059358088153e-05	4.7529633926341194e-05	M2	1.2122493	hypothetical protein
TGME49_314715	2.3165724	1.2119918	0.0026296282165720526	0.0040442198468153626	M2	1.2119918	hypothetical protein
TGME49_253120	2.3161767	1.2117453	2.1212211080967224e-08	9.499967983320297e-08	M2	1.2117453	mandelonitrile lyase putative
TGME49_235550	2.3150814	1.2110629	0.02358131388622498	0.030030995125450162	M2	1.2110629	PHD-finger domain-containing protein
TGME49_248850	2.3149548	1.210984	0.0007362473602117179	0.0012842159837253308	M2	1.210984	methionine aminopeptidase
TGME49_244350	2.3145797	1.2107502	2.0488458393837263e-05	5.012969365556419e-05	M2	1.2107502	DnaJ domain-containing protein
TGME49_273370	2.3142612	1.2105517	0.00027216639799747646	0.0005208510483416381	M2	1.2105517	coatomer gamma 2-subunit protein putative
TGME49_202100	2.313297	1.2099506	1.5914689597266047e-12	1.3449504178649535e-11	M2	1.2099506	hypothetical protein
TGME49_229260	2.3128283	1.2096581	4.36362602075689e-14	4.2632373990076857e-13	M2	1.2096581	hypothetical protein
TGME49_301690	2.312066	1.2091826	0.00038958677465782826	0.000722650972922148	M2	1.2091826	hypothetical protein
TGME49_222290	2.3112338	1.2086632	0.009995066486019154	0.013674649000056317	M2	1.2086632	LSM domain-containing protein
TGME49_278060	2.311052	1.2085497	4.3660279355403534e-05	9.985738046888099e-05	M2	1.2085497	Mre11 DNA-binding domain-containing protein
TGME49_214600	2.3106544	1.2083015	8.926850675484215e-14	8.505165170069572e-13	M2	1.2083015	hypothetical protein
TGME49_286230	2.3102076	1.2080225	1.299732157867283e-11	9.754916932625585e-11	M2	1.2080225	hypothetical protein
TGME49_206415	2.3100226	1.207907	8.424833718701802e-11	5.628321719901102e-10	M2	1.207907	myosin K
TGME49_306380	2.309849	1.2077986	0.034930766645262054	0.04290696350568454	M2	1.2077986	U1 zinc finger protein
TGME49_313700	2.3097737	1.2077515	1.1023001943065563e-06	3.533967732202089e-06	M2	1.2077515	hypothetical protein
TGME49_268990	2.3096197	1.2076553	1.7199625632740654e-05	4.2788942073091335e-05	M2	1.2076553	hypothetical protein
TGME49_216170	2.3090715	1.2073128	0.00047754336645868645	0.0008695796142948414	M2	1.2073128	SufS subfamily cysteine desulfurase
TGME49_221895	2.3078032	1.2065202	0.0005050994456491999	0.0009146336865612574	M2	1.2065202	hypothetical protein
TGME49_284598	2.3075085	1.2063359	1.0843745973464562e-07	4.238690898323266e-07	M2	1.2063359	haloacid dehalogenase family hydrolase domain-containing protein
TGME49_240380	2.3074677	1.2063105	1.4760672616531883e-16	1.8317539542189566e-15	M2	1.2063105	hypothetical protein
TGME49_201660	2.3074057	1.2062716	7.679073130695328e-05	0.00016631431836880116	M2	1.2062716	hypothetical protein
TGME49_209860	2.306946	1.2059842	0.0020122333016061823	0.003180359759093669	M2	1.2059842	SRP40 C-terminal domain-containing protein
TGME49_264875	2.3069005	1.2059557	0.009802053376551685	0.013430148035868726	M2	1.2059557	hypothetical protein
TGME49_217650	2.3060675	1.2054347	0.00045590718953324877	0.0008326932480539194	M2	1.2054347	hypothetical protein
TGME49_312280	2.3059833	1.2053821	1.634676610096805e-08	7.503884862535633e-08	M2	1.2053821	pre-mRNA-splicing factor ATP-dependent RNA helicase putative
TGME49_267510	2.3059745	1.2053765	3.5870736083492066e-07	1.2721090668971524e-06	M2	1.2053765	hypothetical protein
TGME49_319370	2.3049495	1.2047352	3.385565760577278e-12	2.7353170404052176e-11	M2	1.2047352	hypothetical protein
TGME49_229340	2.3046691	1.2045597	2.7927278105500195e-08	1.2285967062445714e-07	M2	1.2045597	hypothetical protein
TGME49_240770	2.30455	1.204485	0.026436978914757426	0.0333461057923306	M2	1.204485	cytochrome b5 family heme/steroid binding domain-containing protein
TGME49_313630	2.3045309	1.2044731	4.1869969885306563e-29	1.1197566946225498e-27	M2	1.2044731	hypothetical protein
TGME49_201710	2.304057	1.2041763	0.031433783567266366	0.03896258505822353	M2	1.2041763	WD domain G-beta repeat-containing protein
TGME49_253890	2.3038025	1.204017	0.0004016795800740738	0.0007418256405607512	M2	1.204017	peptidase M16 inactive domain-containing protein
TGME49_259210	2.3030996	1.2035768	0.0007213658247816908	0.0012608609276587527	M2	1.2035768	jmjC domain-containing protein C2orf60
TGME49_313220	2.3023698	1.2031196	0.028476587080871058	0.03563684842595014	M2	1.2031196	hypothetical protein
TGME49_201250	2.30221	1.2030195	2.9566860220157238e-08	1.2926515039862845e-07	M2	1.2030195	histone lysine methyltransferase SET putative
TGME49_285480	2.3019698	1.2028689	5.150202885171891e-07	1.7750556518184194e-06	M2	1.2028689	hypothetical protein
TGME49_312310	2.3004704	1.2019289	6.8997342812702504e-06	1.8706979278477665e-05	M2	1.2019289	ATPase AAA family protein
TGME49_226520	2.3002203	1.201772	0.0005815134542764937	0.0010378817744647621	M2	1.201772	hypothetical protein
TGME49_271470	2.29999	1.2016275	9.291604680998435e-10	5.252398070843998e-09	M2	1.2016275	hypothetical protein
TGME49_213060	2.2996206	1.2013959	2.8974246316771544e-16	3.4781442560090385e-15	M2	1.2013959	WD domain G-beta repeat-containing protein
TGME49_216470	2.2996142	1.2013918	4.186878396901085e-06	1.190956221212086e-05	M2	1.2013918	hypothetical protein
TGME49_267460	2.299362	1.2012336	3.4664991779019986e-05	8.099359843088136e-05	M2	1.2012336	AP2 domain transcription factor AP2IX-1
TGME49_216290	2.298714	1.2008269	2.7578262306296366e-06	8.171945818741605e-06	M2	1.2008269	hypothetical protein
TGME49_236800	2.2981198	1.200454	0.0012591392055376226	0.0020702306276261574	M2	1.200454	hypothetical protein
TGME49_228060	2.2979248	1.2003316	0.005923294273375077	0.008491562324731599	M2	1.2003316	hypothetical protein
TGME49_286932	2.2977245	1.2002058	5.4504593091588096e-14	5.276269372474353e-13	M2	1.2002058	ATPase family associated with various cellular activities (AAA) domain-containing protein
TGME49_203520	2.2967272	1.1995795	6.323989751749031e-06	1.7290209444202865e-05	M2	1.1995795	hypothetical protein
TGME49_307070	2.2961104	1.199192	1.73374900927218e-07	6.564477095591036e-07	M2	1.199192	hypothetical protein
TGME49_289860	2.2955637	1.1988485	0.0021718804156708126	0.0034065629905037187	M2	1.1988485	hypothetical protein
TGME49_320610	2.295354	1.1987166	0.020256244593245803	0.026071508232945517	M2	1.1987166	hypothetical protein
TGME49_265780	2.2951782	1.1986061	3.6429855127817716e-16	4.311886634246324e-15	M2	1.1986061	flagellar/basal body protein
TGME49_281400	2.2944663	1.1981586	1.852771943911201e-10	1.1728670934826636e-09	M2	1.1981586	phosphofructokinase domain-containing protein
TGME49_203180	2.294291	1.1980484	1.6268351329085892e-14	1.6544384727088433e-13	M2	1.1980484	leucine rich repeat-containing protein
TGME49_249950	2.2924945	1.1969182	2.8861279058348556e-05	6.862877583627002e-05	M2	1.1969182	Mak16 protein
TGME49_265110	2.2922003	1.1967331	7.398328769047675e-06	1.9911871473637547e-05	M2	1.1967331	ribosome biogenesis protein putative
TGME49_310270	2.2916174	1.1963662	7.392111387010963e-09	3.61729781885522e-08	M2	1.1963662	hypothetical protein
TGME49_203000	2.2911773	1.196089	0.0001156817339110151	0.00023943823984373953	M2	1.196089	hypothetical protein
TGME49_312440	2.2910583	1.1960142	1.8541081000498658e-05	4.589650718664738e-05	M2	1.1960142	hypothetical protein
TGME49_329700	2.2905698	1.1957065	1.9932523018835e-05	4.8953720439457884e-05	M2	1.1957065	SAG-related sequence SRS26J
TGME49_215030	2.2903724	1.1955822	8.527335857577302e-09	4.1274063764253026e-08	M2	1.1955822	hypothetical protein
TGME49_265850	2.2901704	1.195455	1.291238968265858e-07	4.985043636735845e-07	M2	1.195455	hypothetical protein
TGME49_257690	2.2898817	1.195273	0.03817467960691634	0.046586890593220215	M2	1.195273	hypothetical protein
TGME49_274010	2.2896132	1.1951039	1.0840236081753328e-14	1.1172053064255779e-13	M2	1.1951039	hypothetical protein
TGME49_313280	2.2885416	1.1944284	4.701717773581742e-09	2.3679509478271337e-08	M2	1.1944284	WD domain G-beta repeat-containing protein
TGME49_263220	2.2877982	1.1939597	0.0007826078356756255	0.00135584641641958	M2	1.1939597	rhoptry kinase family protein ROP21
TGME49_287980	2.2858078	1.1927041	0.002426599542940512	0.0037600280046553485	M2	1.1927041	FHA domain-containing protein
TGME49_278400	2.2854009	1.1924472	2.7609993986835293e-09	1.4385453710403519e-08	M2	1.1924472	Toxoplasma gondii family A protein
TGME49_311905	2.2852082	1.1923256	0.0028686693912379243	0.004378386314854921	M2	1.1923256	hypothetical protein
TGME49_237840	2.2849352	1.1921532	0.007016636789094314	0.009917644673797632	M2	1.1921532	hypothetical protein
TGME49_233245	2.2840967	1.1916237	4.579228696351424e-08	1.9349530856432943e-07	M2	1.1916237	hypothetical protein
TGME49_248660	2.283425	1.1911994	0.006323160806847797	0.009003712212075946	M2	1.1911994	hypothetical protein
TGME49_266310	2.2832751	1.1911047	1.8115291967708206e-07	6.828382355892152e-07	M2	1.1911047	Alpha-1%2C3-mannosyl-glycoprotein 2-beta-N-acetylglucosaminyltransferase
TGME49_274000	2.282352	1.1905212	3.803704117093244e-09	1.9481880905184853e-08	M2	1.1905212	hypothetical protein
TGME49_283820	2.2823517	1.1905211	2.2406034039751828e-07	8.290428794655985e-07	M2	1.1905211	glycine cleavage T-protein (aminomethyl transferase) domain-containing protein
TGME49_308000	2.282258	1.1904619	1.2449101250232876e-10	8.130398351291965e-10	M2	1.1904619	Gpi16 subunit GPI transamidase component protein
TGME49_259890	2.2822416	1.1904515	0.00429262544412567	0.006320030945697916	M2	1.1904515	Kazal-type serine protease inhibitor domain-containing protein
TGME49_269200	2.2808704	1.1895845	0.012373337126171405	0.016648156671433618	M2	1.1895845	crooked neck family 1 protein isoform 2 putative
TGME49_289630	2.280419	1.189299	3.557027099822156e-11	2.5008682213475077e-10	M2	1.189299	microneme protein MIC16
TGME49_252310	2.2791562	1.1884998	0.00024988454188399316	0.00048247070218451597	M2	1.1884998	hypothetical protein
TGME49_310275	2.2784073	1.1880257	0.00014804317981605917	0.00029959600398120595	M2	1.1880257	hypothetical protein
TGME49_304750	2.2771962	1.1872586	5.380937098755928e-07	1.8455478661358094e-06	M2	1.1872586	zinc finger C3HC4 type (RING finger) domain-containing protein
TGME49_210700	2.27693	1.18709	8.66940097679197e-19	1.2763956037433614e-17	M2	1.18709	hypothetical protein
TGME49_312400	2.2766073	1.1868855	0.0011935936629882827	0.0019735981306816626	M2	1.1868855	exosomal 3'-5' exoribonuclease complex subunit putative
TGME49_269130	2.2760472	1.1865305	0.00021287592304734194	0.00041624581806411074	M2	1.1865305	hypothetical protein
TGME49_213635	2.275711	1.1863174	1.2885800036700159e-08	6.023113722906694e-08	M2	1.1863174	hypothetical protein
TGME49_269350	2.275699	1.1863097	4.887625184618093e-11	3.382909126552621e-10	M2	1.1863097	hypothetical protein
TGME49_314875	2.2751105	1.1859366	1.0372585123181353e-06	3.344476034948707e-06	M2	1.1859366	RIC1 protein
TGME49_242890	2.275053	1.1859002	4.832655147444383e-08	2.0298592768912765e-07	M2	1.1859002	hypothetical protein
TGME49_233710	2.275047	1.1858964	4.697946829297665e-08	1.9821442163951358e-07	M2	1.1858964	inorganic anion transporter sulfate permease (SulP) family protein
TGME49_219460	2.2747838	1.1857295	0.0013258013418490572	0.002169703164207278	M2	1.1857295	hypothetical protein
TGME49_246140	2.2747178	1.1856875	3.364155640942182e-07	1.2026429493063614e-06	M2	1.1856875	hypothetical protein
TGME49_278340	2.272726	1.1844238	0.007768046914994641	0.01087243532272602	M2	1.1844238	Toxoplasma gondii family A protein
TGME49_293230	2.2726183	1.1843554	0.0024887802425719173	0.003845097226686522	M2	1.1843554	hypothetical protein
TGME49_240220	2.2726154	1.1843536	6.807533900214613e-05	0.00014923597662960748	M2	1.1843536	hypothetical protein
TGME49_269850	2.2720323	1.1839833	2.276458081695058e-08	1.013611551549259e-07	M2	1.1839833	protein c21orf59 putative
TGME49_313100	2.2717953	1.1838329	8.318687569611962e-10	4.753294702555151e-09	M2	1.1838329	signal recognition particle SRP54 protein
TGME49_264450	2.2716966	1.1837702	3.4711604534081975e-09	1.785439865596633e-08	M2	1.1837702	DNA topoisomerase III beta-1 putative
TGME49_268830	2.2715487	1.1836762	0.013053708135921813	0.017469024141991328	M2	1.1836762	hypothetical protein
TGME49_212100	2.271534	1.1836668	0.011878516441290832	0.016051381906835437	M2	1.1836668	ThiF family protein
TGME49_313650	2.2713525	1.1835517	0.03925784410002772	0.047791420410448614	M2	1.1835517	hypothetical protein
TGME49_297820	2.2710736	1.1833744	2.3258743255942517e-08	1.033980217022463e-07	M2	1.1833744	sperm associated antigen 6 putative
TGME49_223640	2.270731	1.1831567	1.5160449203080537e-06	4.736449397975365e-06	M2	1.1831567	hypothetical protein
TGME49_270090	2.270565	1.1830513	4.268979522071555e-10	2.5460230021896054e-09	M2	1.1830513	hypothetical protein
TGME49_264940	2.2695673	1.1824173	9.469984906842471e-06	2.4862020021039368e-05	M2	1.1824173	kelch repeat-containing protein
TGME49_275590	2.2691872	1.1821756	0.005847353035603699	0.00839123459057342	M2	1.1821756	mono- or diacylglycerol acyltransferase
TGME49_234430	2.267913	1.1813654	2.1336699511596013e-06	6.465272412065181e-06	M2	1.1813654	hypothetical protein
TGME49_263170	2.2677205	1.1812428	0.026429065897163623	0.03334110104447377	M2	1.1812428	hypothetical protein
TGME49_224980	2.267328	1.1809931	0.00018546611046929735	0.0003676692703673544	M2	1.1809931	hypothetical protein
TGME49_230960	2.2666914	1.180588	0.00022368166972760062	0.00043556078130597997	M2	1.180588	splicing factor 3b subunit 3 putative
TGME49_315600	2.265533	1.1798505	0.00012789252873340884	0.00026258983487027163	M2	1.1798505	MCM2/3/5 family protein
TGME49_316110	2.2651072	1.1795793	0.0006046031660293459	0.0010725233744991608	M2	1.1795793	ribosomal protein RPS15
TGME49_239340	2.2650344	1.179533	1.2739181004179973e-07	4.922671178158435e-07	M2	1.179533	hypothetical protein
TGME49_266800	2.2649457	1.1794765	0.0003049665675089713	0.0005770874299190139	M2	1.1794765	integral membrane protein putative
TGME49_213840	2.263771	1.1787281	0.0030960475163887935	0.0046873338518455205	M2	1.1787281	hypothetical protein
TGME49_320750	2.263749	1.1787139	1.0024764207246261e-05	2.614792664056733e-05	M2	1.1787139	hypothetical protein
TGME49_289080	2.2632926	1.178423	3.7564111092871297e-07	1.3282606813634115e-06	M2	1.178423	HEAT repeat-containing protein
TGME49_251570	2.2632575	1.1784008	3.001001662860715e-06	8.849080618574983e-06	M2	1.1784008	CAAX amino terminal protease family protein
TGME49_311755	2.262278	1.1777763	0.01522328485100222	0.02011129908954506	M2	1.1777763	plasma membrane protein 62D16
TGME49_312560	2.262245	1.1777551	4.135423005510882e-10	2.4733517211303938e-09	M2	1.1777551	hypothetical protein
TGME49_251600	2.2622392	1.1777515	0.0025125458615761994	0.00387897790942281	M2	1.1777515	IMP4 family U3 small nucleolar ribonucleoprotein (snoRNP) putative
TGME49_216150	2.2616754	1.1773919	0.0014714020199827328	0.002383518970840344	M2	1.1773919	peptidase family M3 protein
TGME49_257710	2.2613416	1.1771789	0.003205879558744537	0.00483628849534989	M2	1.1771789	actin-like protein ALP 5
TGME49_202930	2.2612057	1.1770922	0.009240253667449835	0.0127222847415475	M2	1.1770922	hypothetical protein
TGME49_213392	2.261176	1.1770734	6.96608668354043e-06	1.8868717488012877e-05	M2	1.1770734	surface antigen repeat-containing protein
TGME49_272475	2.2611747	1.1770724	1.0761848505814451e-07	4.2086247904968967e-07	M2	1.1770724	protein kinase domain-containing protein
TGME49_256910	2.2609885	1.1769537	0.0001707214187762557	0.0003410796004912853	M2	1.1769537	hypothetical protein
TGME49_223580	2.2608557	1.1768689	0.00012221084065371034	0.0002520878238624618	M2	1.1768689	mediator complex subunit MED4
TGME49_221922	2.2608323	1.176854	0.0037237363251928133	0.005552098744566772	M2	1.176854	NifU family domain-containing protein
TGME49_242780	2.2607234	1.1767845	2.0165879483760337e-10	1.2661355684788902e-09	M2	1.1767845	hypothetical protein
TGME49_205410	2.2600005	1.176323	3.97649743637247e-06	1.1372378962701774e-05	M2	1.176323	RNA pseudouridine synthase superfamily protein
TGME49_213340	2.2599213	1.1762725	0.0005543966007335365	0.000993680948631838	M2	1.1762725	GMC oxidoreductase
TGME49_269800	2.2595925	1.1760626	1.6140557745123125e-05	4.0392020581591806e-05	M2	1.1760626	glutamine-dependent NAD(+) synthetase protein putative
TGME49_280725	2.2593544	1.1759106	4.592835100668161e-05	0.00010447927169783749	M2	1.1759106	hypothetical protein
TGME49_278430	2.2590313	1.1757042	0.021439026114705644	0.027476677236180982	M2	1.1757042	Toxoplasma gondii family A protein
TGME49_318240	2.2579868	1.175037	6.009020344023189e-09	2.976684110629541e-08	M2	1.175037	Tubulin-tyrosine ligase family protein
TGME49_223420	2.2575755	1.1747743	0.0011663935630449572	0.0019327827453515555	M2	1.1747743	DnaJ domain-containing protein
TGME49_230100	2.25739	1.1746557	6.24695370093907e-05	0.00013794879991281967	M2	1.1746557	membrane protein putative
TGME49_281990	2.2568216	1.1742924	3.8587764200777516e-07	1.3604722372163988e-06	M2	1.1742924	Nicotinamidase
TGME49_312905	2.256245	1.1739237	1.4838512603283875e-07	5.658856949925633e-07	M2	1.1739237	hypothetical protein
TGME49_233930	2.2561476	1.1738615	4.580525272242362e-06	1.291194765701141e-05	M2	1.1738615	CAF1 family ribonuclease
TGME49_260440	2.2559736	1.1737502	1.6067364739976479e-15	1.7961018441473705e-14	M2	1.1737502	nuclear factor NF3
TGME49_230460	2.2558978	1.1737016	0.004493434356194121	0.006589278803435106	M2	1.1737016	Dpy-30 motif protein
TGME49_201150	2.2557993	1.1736387	3.5534670682459585e-10	2.149631366767831e-09	M2	1.1736387	heavy metal translocating P-type ATPase subfamily protein
TGME49_309400	2.2552614	1.1732947	1.2825256140511015e-06	4.065500361720127e-06	M2	1.1732947	RecF/RecN/SMC N terminal domain-containing protein
TGME49_244610	2.2524595	1.1715012	0.0005107780779254813	0.0009235313514223882	M2	1.1715012	zinc finger C3HC4 type (RING finger) domain-containing protein
TGME49_229740	2.2523384	1.1714237	1.1790134796178518e-06	3.7599407231133828e-06	M2	1.1714237	hypothetical protein
TGME49_262850	2.252289	1.171392	0.0002600396214034812	0.0005000215791765233	M2	1.171392	hypothetical protein
TGME49_312370	2.2522328	1.171356	6.794633789761012e-07	2.2795335513009256e-06	M2	1.171356	RNA pseudouridine synthase superfamily protein
TGME49_230220	2.2517748	1.1710626	5.37713269119363e-10	3.168908533701351e-09	M2	1.1710626	hypothetical protein
TGME49_318140	2.2515907	1.1709446	0.013812430093250873	0.018411490018621943	M2	1.1709446	SART-1 family protein
TGME49_316510	2.2512972	1.1707566	3.251027409694472e-09	1.678340417796456e-08	M2	1.1707566	hypothetical protein
TGME49_246555	2.2502387	1.170078	0.03012099995775696	0.03752248977638621	M2	1.170078	hypothetical protein
TGME49_220070	2.249453	1.1695743	0.0002712849446804792	0.0005192817819920112	M2	1.1695743	hypothetical protein
TGME49_209005	2.2493951	1.1695371	0.0308858779499052	0.03836222142190606	M2	1.1695371	hypothetical protein
TGME49_261600	2.2491317	1.1693681	0.0008110299068932398	0.0013973524450876186	M2	1.1693681	creatinase domain-containing protein
TGME49_224290	2.2489378	1.1692438	3.3511304094086377e-07	1.1984935713039526e-06	M2	1.1692438	DHHC zinc finger domain-containing protein
TGME49_295400	2.2482836	1.1688241	3.453118704746364e-06	1.0007649579496406e-05	M2	1.1688241	hypothetical protein
TGME49_320760	2.248232	1.1687908	3.816026329321865e-08	1.6353569223681078e-07	M2	1.1687908	hypothetical protein
TGME49_213420	2.2476277	1.1684031	4.405169745852655e-05	0.00010058927187841336	M2	1.1684031	RAP domain-containing protein
TGME49_318720	2.2471545	1.1680993	0.001943523247607937	0.0030804041570770212	M2	1.1680993	pyridoxal phosphate enzyme YggS family protein
TGME49_270610	2.2452729	1.1668907	1.9817959016482506e-08	8.9275891070519e-08	M2	1.1668907	hypothetical protein
TGME49_227070	2.2439377	1.1660327	0.027931562481772313	0.03503259639855414	M2	1.1660327	hypothetical protein
TGME49_203960	2.243718	1.1658913	6.245889680445002e-06	1.7093268681813703e-05	M2	1.1658913	hypothetical protein
TGME49_253660	2.2434928	1.1657466	0.024241290318193706	0.030797225568108093	M2	1.1657466	hypothetical protein
TGME49_242270	2.243224	1.1655736	0.0018623823351254622	0.002961240473028275	M2	1.1655736	hypothetical protein
TGME49_270820	2.243077	1.1654792	1.969841348356098e-05	4.843505741913699e-05	M2	1.1654792	hypothetical protein
TGME49_201895	2.2429483	1.1653963	0.0021804904281982817	0.003417530528320415	M2	1.1653963	hypothetical protein
TGME49_293280	2.2427793	1.1652876	4.682135160775226e-05	0.00010636753828954688	M2	1.1652876	cyclin protein
TGME49_233190	2.242393	1.1650392	0.00013348045785665404	0.00027300177864147707	M2	1.1650392	SKIP/SNW domain-containing protein
TGME49_217710	2.2415006	1.164465	6.948633754359792e-05	0.00015201372989410975	M2	1.164465	DnaJ domain-containing protein
TGME49_235190	2.2411728	1.1642538	1.0743545348189086e-06	3.4522320052298844e-06	M2	1.1642538	hypothetical protein
TGME49_234310	2.2409735	1.1641256	0.0018827495969821833	0.0029908114368602315	M2	1.1641256	hypothetical protein
TGME49_309195	2.240844	1.1640422	1.6597787107192355e-05	4.140138690758046e-05	M2	1.1640422	hypothetical protein
TGME49_313690	2.2399108	1.1634413	5.832105482890425e-05	0.00012970295641028152	M2	1.1634413	Sel1 repeat-containing protein
TGME49_264850	2.239653	1.1632752	0.0385230134762685	0.046984844405822644	M2	1.1632752	hypothetical protein
TGME49_223870	2.239564	1.1632179	0.0004994519736884662	0.0009055714717101968	M2	1.1632179	hypothetical protein
TGME49_289000	2.2393177	1.1630592	0.0004425804471615714	0.0008101033915881396	M2	1.1630592	hypothetical protein
TGME49_280522	2.2383232	1.1624184	0.02990125754518968	0.03728172433083476	M2	1.1624184	hypothetical protein
TGME49_231770	2.238288	1.1623956	9.287557031172555e-08	3.6763065325732676e-07	M2	1.1623956	alpha-tubulin I putative
TGME49_295035	2.2382717	1.1623852	0.0009490451369557834	0.001609871628344706	M2	1.1623852	hypothetical protein
TGME49_230890	2.238059	1.1622481	6.025981184856358e-06	1.6561159997795472e-05	M2	1.1622481	PHD-finger domain-containing protein
TGME49_224080	2.2379515	1.1621788	8.393177020885245e-10	4.792617500236568e-09	M2	1.1621788	Kazal-type serine protease inhibitor domain-containing protein
TGME49_252380	2.2378407	1.1621073	5.346047045755252e-09	2.665453898742043e-08	M2	1.1621073	hypothetical protein
TGME49_260000	2.2371023	1.1616312	9.673804726740552e-06	2.533415672317459e-05	M2	1.1616312	hypothetical protein
TGME49_226532	2.2367039	1.1613743	0.0019959821661516383	0.0031564455999527497	M2	1.1613743	hypothetical protein
TGME49_246610	2.2366652	1.1613493	3.106132741202668e-05	7.326242756322565e-05	M2	1.1613493	hypothetical protein
TGME49_229970	2.2365112	1.16125	0.01398529173731104	0.018624283087301543	M2	1.16125	tRNA-Arg
TGME49_224928	2.236461	1.1612176	8.706856127529025e-08	3.4708321289503675e-07	M2	1.1612176	histone lysine demethylase JMJD4
TGME49_253830	2.2362752	1.1610978	5.278413647421046e-06	1.4659176383291244e-05	M2	1.1610978	hypothetical protein
TGME49_228620	2.2359838	1.1609098	0.0027969985440751757	0.004279817978631054	M2	1.1609098	hypothetical protein
TGME49_209190	2.2354615	1.1605726	0.00029717226788531035	0.0005639799766222227	M2	1.1605726	ABC transporter transmembrane region domain-containing protein
TGME49_212130	2.235189	1.1603968	3.3022219164161086e-05	7.732634362879616e-05	M2	1.1603968	phospholipase patatin family protein
TGME49_213870	2.234753	1.1601154	3.5920892698341127e-13	3.2021884408616128e-12	M2	1.1601154	UBA/TS-N domain-containing protein
TGME49_315680	2.2344968	1.15995	5.0298522379964486e-05	0.00011365583225483419	M2	1.15995	vacuolar protein sorting-associated protein vps4 putative
TGME49_202640	2.2343159	1.1598332	0.00014658833994191778	0.00029714993064263546	M2	1.1598332	RNA pseudouridine synthase superfamily protein
TGME49_274040	2.233843	1.1595279	6.962745024229675e-05	0.0001522830181153338	M2	1.1595279	hypothetical protein
TGME49_267360	2.2327127	1.1587976	1.8260226316240177e-07	6.879945278579837e-07	M2	1.1587976	histone deacetylase SIR2-like
TGME49_313200	2.2325554	1.1586959	0.0004702824034465434	0.0008572814045571049	M2	1.1586959	leucine rich repeat-containing protein
TGME49_312350	2.2324336	1.1586173	0.005863095264195663	0.008409541425274532	M2	1.1586173	IMPACT putative
TGME49_233920	2.2323883	1.1585879	0.00019295245078401591	0.0003813473249709351	M2	1.1585879	zinc finger C3HC4 type (RING finger) domain-containing protein
TGME49_202650	2.2320542	1.158372	6.981869822119473e-10	4.035826393073301e-09	M2	1.158372	hypothetical protein
TGME49_244040	2.231854	1.1582426	6.02561359173208e-10	3.5191748765534074e-09	M2	1.1582426	HEAT repeat-containing protein
TGME49_231190	2.231598	1.1580771	0.0011426338070024515	0.0018989967164164635	M2	1.1580771	arsenite-activated ATPase family protein
TGME49_313950	2.2311344	1.1577774	0.00025956819548808975	0.0004993423218916109	M2	1.1577774	GMC oxidoreductase
TGME49_316320	2.2305067	1.1573715	4.063537359439114e-08	1.7317677369954592e-07	M2	1.1573715	ABC transporter transmembrane region domain-containing protein
TGME49_255290	2.2304769	1.1573522	2.235660387570233e-07	8.279389104012288e-07	M2	1.1573522	hypothetical protein
TGME49_260840	2.2301037	1.1571108	0.0013065766365671129	0.0021407288010137013	M2	1.1571108	hypothetical protein
TGME49_216120	2.229704	1.1568521	8.95477884471691e-05	0.00019062175319068666	M2	1.1568521	hypothetical protein
TGME49_211080	2.2296977	1.1568481	2.949619394682737e-05	6.986332260219677e-05	M2	1.1568481	hypothetical protein
TGME49_248550	2.2286782	1.1561884	6.195302976589317e-07	2.095936967780477e-06	M2	1.1561884	SPX domain-containing protein
TGME49_290160	2.228035	1.1557719	9.842799970764627e-06	2.571298378761418e-05	M2	1.1557719	sortilin putative
TGME49_214550	2.2266948	1.1549039	0.034999664367247205	0.042979099617495804	M2	1.1549039	hypothetical protein
TGME49_311750	2.2266202	1.1548555	0.0014658962399330868	0.002375055430152323	M2	1.1548555	mago binding protein
TGME49_258832	2.2265944	1.1548388	2.5159687301497245e-09	1.3206491763040573e-08	M2	1.1548388	Vps52 / Sac2 family protein
TGME49_222030	2.2265542	1.1548127	5.765061578571181e-07	1.96771144590085e-06	M2	1.1548127	hypothetical protein
TGME49_228250	2.2264557	1.1547489	5.693171554835991e-05	0.00012688025530041918	M2	1.1547489	elongation factor Tu GTP binding domain-containing protein
TGME49_232220	2.2263381	1.1546727	0.008452761516780642	0.011739406339903566	M2	1.1546727	SWIB/MDM2 domain-containing protein
TGME49_203090	2.2258027	1.1543257	7.46353772098532e-06	2.0074588567806157e-05	M2	1.1543257	hypothetical protein
TGME49_239070	2.224798	1.1536744	6.037298461404683e-05	0.0001337033786617688	M2	1.1536744	hypothetical protein
TGME49_317820	2.224663	1.1535869	0.012024905452035117	0.016215490023160806	M2	1.1535869	hypothetical protein
TGME49_237410	2.2242608	1.1533259	1.6279094254875866e-06	5.043058121259382e-06	M2	1.1533259	protein phosphatase 2C domain-containing protein
TGME49_286000	2.2242212	1.1533003	0.038159620814526604	0.046575239096413104	M2	1.1533003	hypothetical protein
TGME49_310500	2.22399	1.1531503	0.001981636752018695	0.0031349330197135887	M2	1.1531503	hypothetical protein
TGME49_203770	2.223528	1.1528505	0.003123954250463789	0.004724505613935125	M2	1.1528505	hypothetical protein
TGME49_217000	2.2225194	1.152196	0.0003525765598357863	0.0006595007762665405	M2	1.152196	hypothetical protein
TGME49_264860	2.2218075	1.1517339	1.303345160318947e-15	1.4686093266473893e-14	M2	1.1517339	zinc finger C3HC4 type (RING finger) domain-containing protein
TGME49_258210	2.2216547	1.1516346	2.678722651570327e-05	6.418453396206644e-05	M2	1.1516346	DNA-directed RNA polymerase II RPB2
TGME49_223440	2.2214403	1.1514953	2.2365145967563688e-06	6.740650804988613e-06	M2	1.1514953	DEAD/DEAH box helicase domain-containing protein
TGME49_264190	2.22139	1.1514627	3.196960490012652e-05	7.513212764487465e-05	M2	1.1514627	hypothetical protein
TGME49_316900	2.2213519	1.151438	1.5079372829227743e-10	9.705695337380324e-10	M2	1.151438	Sas10 C-terminal domain-containing protein
TGME49_205070	2.2213264	1.1514213	0.0017462004534238803	0.002791740452494365	M2	1.1514213	hypothetical protein
TGME49_202730	2.2212083	1.1513448	2.777961680447417e-11	1.987853866338791e-10	M2	1.1513448	hypothetical protein
TGME49_263670	2.220228	1.1507078	0.018266681821772848	0.023727594232370478	M2	1.1507078	ribosomal RNA large subunit methyltransferase FTSJ1 putative
TGME49_293680	2.2201712	1.1506709	0.004049106165413763	0.005990720623934123	M2	1.1506709	hypothetical protein
TGME49_270670	2.2194116	1.1501772	0.00032495844875945866	0.0006124495652243946	M2	1.1501772	hypothetical protein
TGME49_263760	2.2183726	1.1495017	0.00018224372246357365	0.0003621306603667202	M2	1.1495017	hypothetical protein
TGME49_274170	2.2179189	1.1492066	1.3735634792618702e-06	4.332954446898867e-06	M2	1.1492066	protein kinase (incomplete catalytic triad)
TGME49_214850	2.2176623	1.1490397	0.0010367217483775776	0.0017404321604169465	M2	1.1490397	1-deoxy-D-xylulose 5-phosphate reductoisomerase putative
TGME49_286190	2.2173703	1.1488497	1.325678338966209e-07	5.101688361841272e-07	M2	1.1488497	hypothetical protein
TGME49_236940	2.2172015	1.1487398	3.7267935924642575e-08	1.601990470494173e-07	M2	1.1487398	hypothetical protein
TGME49_269640	2.2171931	1.1487345	0.0015874171077099558	0.0025562618096907084	M2	1.1487345	hypothetical protein
TGME49_249520	2.2162192	1.1481006	0.02916595042189664	0.03646175251707818	M2	1.1481006	hypothetical protein
TGME49_247940	2.2157972	1.1478258	7.079004612955195e-09	3.4761573494528966e-08	M2	1.1478258	hypothetical protein
TGME49_253500	2.2156422	1.1477249	0.0022966713071808434	0.0035777270446055867	M2	1.1477249	hypothetical protein
TGME49_288265	2.214843	1.1472044	0.02802276671632263	0.035120925629488736	M2	1.1472044	hypothetical protein
TGME49_308070	2.2143939	1.1469119	0.00032999845411021343	0.000621117357613678	M2	1.1469119	hypothetical protein
TGME49_278280	2.2139926	1.1466504	0.00030133790221580884	0.000571628869051807	M2	1.1466504	WD domain G-beta repeat-containing protein
TGME49_281950	2.2125435	1.1457058	4.128647407295422e-07	1.4471671189984907e-06	M2	1.1457058	membrane protein putative
TGME49_278170	2.2124422	1.1456398	0.0043632672664200125	0.006408406616008954	M2	1.1456398	hypothetical protein
TGME49_297320	2.2123787	1.1455984	4.125853344871071e-07	1.446787826452507e-06	M2	1.1455984	hypothetical protein
TGME49_314362	2.2122526	1.1455162	5.0362535643330344e-08	2.1090871591763367e-07	M2	1.1455162	hypothetical protein
TGME49_313120	2.2115207	1.1450387	4.185994306979404e-06	1.1911056528041396e-05	M2	1.1450387	DNA-directed RNA polymerase alpha subunit
TGME49_217880	2.2110124	1.1447071	0.018485704530505485	0.02399365519694392	M2	1.1447071	RNA-binding protein Nova-1 putative
TGME49_243240	2.2107167	1.1445142	0.0005083508082810534	0.000919536104619688	M2	1.1445142	WD domain G-beta repeat-containing protein
TGME49_243670	2.2094975	1.1437182	0.0008195828113282506	0.001410363335071278	M2	1.1437182	hypothetical protein
TGME49_299800	2.2090886	1.1434512	0.001151384750814735	0.0019105345629560817	M2	1.1434512	hypothetical protein
TGME49_220340	2.20897	1.1433738	4.7077003045140644e-07	1.633871674474265e-06	M2	1.1433738	hypothetical protein
TGME49_320230	2.2088861	1.143319	7.310478075885795e-05	0.0001591059753265796	M2	1.143319	SAG-related sequence SRS15C
TGME49_234940	2.2086031	1.1431342	0.00010477217958591368	0.000219328632568877	M2	1.1431342	hypothetical protein
TGME49_230700	2.2083895	1.1429946	1.768280726886485e-10	1.1244349452910222e-09	M2	1.1429946	hypothetical protein
TGME49_272670	2.20804	1.1427662	3.4241580153301853e-10	2.075865092364089e-09	M2	1.1427662	peptidase family M3 protein
TGME49_294780	2.2079556	1.1427112	0.012521547801897048	0.016823465894090932	M2	1.1427112	hypothetical protein
TGME49_256900	2.207858	1.1426475	6.472953735114598e-05	0.00014245555212357675	M2	1.1426475	DEAD/DEAH box helicase domain-containing protein
TGME49_213400	2.2069154	1.1420313	1.2584146832278429e-05	3.210039990328554e-05	M2	1.1420313	zinc finger (CCCH type) motif-containing protein
TGME49_249280	2.2067494	1.1419228	0.0323920827505293	0.03998619505181465	M2	1.1419228	hypothetical protein
TGME49_254710	2.2064877	1.1417516	7.948657757775767e-08	3.1896536899792497e-07	M2	1.1417516	serine esterase (DUF676) protein
TGME49_265010	2.2058425	1.1413298	0.0010316725655991352	0.001733677640063291	M2	1.1413298	glutamate 5-kinase domain-containing protein
TGME49_220230	2.2057726	1.1412841	1.8035030644057053e-06	5.538301016458072e-06	M2	1.1412841	leucine rich repeat-containing protein
TGME49_280435	2.204572	1.1404986	0.0001306817140988052	0.0002677311917209704	M2	1.1404986	hypothetical protein
TGME49_318310	2.2033012	1.1396667	0.00015024055245499714	0.00030375189205674184	M2	1.1396667	transketolase
TGME49_239310	2.2026715	1.1392543	0.018246706308317	0.023708935272384216	M2	1.1392543	ribulose 5-phosphate isomerase
TGME49_214490	2.2025878	1.1391995	1.7015096515934196e-10	1.0852421181596973e-09	M2	1.1391995	peptidase M16 inactive domain-containing protein
TGME49_310850	2.2025614	1.1391822	0.00044201246872267405	0.0008094143820531567	M2	1.1391822	MYND finger domain-containing protein
TGME49_257330	2.2019248	1.1387652	3.0392258006549888e-05	7.180457713540763e-05	M2	1.1387652	hypothetical protein
TGME49_250060	2.2018414	1.1387105	0.0014645644356474988	0.002373807833842925	M2	1.1387105	DNA-directed RNA polymerase I RPA12
TGME49_265460	2.200608	1.1379021	0.00019453043189925756	0.0003841067009300527	M2	1.1379021	hypothetical protein
TGME49_286560	2.200545	1.1378609	0.0028671792014411173	0.00437769312220034	M2	1.1378609	U6 snRNA-associated Sm family protein
TGME49_209970	2.200449	1.137798	1.8801281776488568e-14	1.9028698478216155e-13	M2	1.137798	Spc97 / Spc98 family protein
TGME49_258370	2.2003136	1.1377091	5.990188797295768e-07	2.0355080629652805e-06	M2	1.1377091	rhoptry kinase family protein ROP28
TGME49_318120	2.2002323	1.1376559	1.0192079108052197e-11	7.752768725665987e-11	M2	1.1376559	hypothetical protein
TGME49_289840	2.1995814	1.137229	2.795039598516118e-06	8.276411929593453e-06	M2	1.137229	hypothetical protein
TGME49_313210	2.1993587	1.1370829	4.2833791505947225e-06	1.2163587769380376e-05	M2	1.1370829	hypothetical protein
TGME49_247390	2.1984622	1.1364948	5.307677021748657e-09	2.6478853902478097e-08	M2	1.1364948	ATPase AAA family protein
TGME49_216510	2.1983883	1.1364462	0.00154486015836249	0.002493432620000268	M2	1.1364462	thioredoxin putative
TGME49_220910	2.1983232	1.1364036	4.6845677615816575e-09	2.360720462321204e-08	M2	1.1364036	HEAT repeat-containing protein
TGME49_207450	2.198267	1.1363666	0.002934614738688064	0.004468545793991501	M2	1.1363666	DNA segment Chr 10 Wayne State University 52 expressed family protein
TGME49_243750	2.1981206	1.1362705	3.28472340404589e-05	7.693790877935648e-05	M2	1.1362705	tetratricopeptide repeat-containing protein
TGME49_208090	2.1979356	1.136149	0.014849334409503173	0.019678802743407765	M2	1.136149	5-formyltetrahydrofolate cyclo-ligase
TGME49_219540	2.1977484	1.1360263	9.414646148180407e-09	4.505276024817249e-08	M2	1.1360263	cytosolic tRNA-Ala synthetase
TGME49_278410	2.1973488	1.1357639	0.0012362822154001027	0.0020378039793926797	M2	1.1357639	Toxoplasma gondii family A protein
TGME49_312990	2.1972566	1.1357033	0.0004787952623897434	0.0008714836878000693	M2	1.1357033	DEAD/DEAH box ATP-dependent RNA helicase
TGME49_211230	2.1969047	1.1354723	2.9809028619049078e-05	7.054497363751995e-05	M2	1.1354723	eukaryotic initiation factor-2B alpha subunit putative
TGME49_312700	2.1966505	1.1353054	1.9750963319430162e-12	1.6509929872651268e-11	M2	1.1353054	hypothetical protein
TGME49_263000	2.195998	1.1348767	1.1363509077349622e-06	3.634860530381592e-06	M2	1.1348767	Beige/BEACH domain-containing protein
TGME49_214240	2.1957605	1.1347207	3.104274963875001e-07	1.1158752751896058e-06	M2	1.1347207	bromodomain-containing protein
TGME49_318260	2.195639	1.1346408	3.5712180923247344e-07	1.2670178042920374e-06	M2	1.1346408	transcription initiation factor TFIID subunit TAF5
TGME49_319992	2.1948886	1.1341478	7.464206529380772e-05	0.00016232632367420716	M2	1.1341478	hypothetical protein
TGME49_318690	2.1941817	1.133683	5.0014443704055965e-05	0.00011310464643911612	M2	1.133683	RNA recognition motif-containing protein
TGME49_271920	2.1936262	1.1333177	2.1048307145383585e-05	5.138048633322839e-05	M2	1.1333177	hypothetical protein
TGME49_270220	2.1934218	1.1331832	0.0013899956730171476	0.002263799081261884	M2	1.1331832	hypothetical protein
TGME49_220430	2.1916347	1.1320074	0.0014069638597258645	0.0022879067882515453	M2	1.1320074	hypothetical protein
TGME49_271600	2.1912098	1.1317276	0.015639145940683153	0.020605928023809377	M2	1.1317276	hypothetical protein
TGME49_309940	2.1911778	1.1317066	0.00011294450768126092	0.00023417419882589205	M2	1.1317066	phospholipase D active site domain-containing protein
TGME49_247280	2.1910837	1.1316446	1.4840296754142754e-05	3.7437417274406096e-05	M2	1.1316446	hypothetical protein
TGME49_248770	2.1910837	1.1316446	0.019237149529484732	0.02487729926146526	M2	1.1316446	hypothetical protein
TGME49_212240	2.1907785	1.1314436	4.503886667134592e-05	0.00010262158593678736	M2	1.1314436	beta-1 tubulin putative
TGME49_254230	2.1906712	1.1313729	0.03688983684359064	0.04512970630648299	M2	1.1313729	hypothetical protein
TGME49_313020	2.1897967	1.1307969	2.062709538221562e-07	7.716670344183454e-07	M2	1.1307969	STAS domain-containing protein
TGME49_284190	2.1895494	1.1306341	4.215410257482277e-11	2.941736753590646e-10	M2	1.1306341	pyruvate carboxylase
TGME49_313740	2.1894097	1.1305419	0.0024362618159967674	0.0037743077189713436	M2	1.1305419	zinc finger (CCCH type) motif-containing protein
TGME49_285170	2.188172	1.1297262	0.000856311136742622	0.0014669948138276705	M2	1.1297262	ribosomal RNA large subunit methyltransferase I putative
TGME49_229900	2.1880143	1.1296221	9.311478602285132e-06	2.449153615559031e-05	M2	1.1296221	hypothetical protein
TGME49_207790	2.187506	1.129287	0.005422121871431065	0.007816846116592276	M2	1.129287	enkurin putative
TGME49_235610	2.1870704	1.1289996	0.0007099264617980726	0.0012429228358515666	M2	1.1289996	ATPase AAA family protein
TGME49_247330	2.1867812	1.1288089	9.382208768751187e-11	6.233415589993418e-10	M2	1.1288089	hypothetical protein
TGME49_243490	2.186633	1.1287112	1.8942579510196123e-05	4.6767087186873336e-05	M2	1.1287112	BCS1 family isoform 9 putative
TGME49_267030	2.1864874	1.128615	1.3671375416566532e-09	7.49752067783282e-09	M2	1.128615	ribonuclease type III Dicer
TGME49_321370	2.1861157	1.1283698	2.150885993574349e-05	5.239878216113239e-05	M2	1.1283698	hypothetical protein
TGME49_248760	2.1857128	1.1281039	2.0201246678153363e-06	6.145454847986827e-06	M2	1.1281039	subtilisin SUB7
TGME49_275568	2.1854703	1.1279438	4.326007888521276e-05	9.910298906449797e-05	M2	1.1279438	GPI transamidase subunit PIG-U protein
TGME49_260420	2.1853297	1.1278509	0.015745074107917187	0.02072288137143874	M2	1.1278509	HEC/Ndc80p family protein
TGME49_225500	2.185173	1.1277475	0.004799340153549331	0.006995381793315867	M2	1.1277475	hypothetical protein
TGME49_206670	2.1851585	1.1277379	1.931930627081662e-05	4.755824564365605e-05	M2	1.1277379	hypothetical protein
TGME49_202360	2.1851497	1.127732	0.0006986553188008287	0.001224457921855206	M2	1.127732	methylase putative
TGME49_251958	2.1845734	1.1273515	5.381383919660174e-05	0.00012082379252138185	M2	1.1273515	SAG-related sequence SRS59B
TGME49_250040	2.1845198	1.1273161	1.0672257954916813e-05	2.765754430450843e-05	M2	1.1273161	hypothetical protein
TGME49_290280	2.184433	1.1272588	0.0025956122123958923	0.003996268684087754	M2	1.1272588	hypothetical protein
TGME49_231180	2.1841857	1.1270956	0.015964533416485446	0.020985576590872378	M2	1.1270956	hypothetical protein
TGME49_270230	2.184005	1.1269761	1.7385028322845928e-09	9.393917797721926e-09	M2	1.1269761	hypothetical protein
TGME49_231400	2.1838698	1.1268868	0.00039073620162909404	0.0007243061285298253	M2	1.1268868	tubulin/FtsZ family GTPase domain-containing protein
TGME49_248430	2.183159	1.1264173	0.0025297723674909487	0.0039027211167699904	M2	1.1264173	hypothetical protein
TGME49_316220	2.1830842	1.1263678	0.03085067209283447	0.03832976034350839	M2	1.1263678	mediator complex subunit MED6
TGME49_255250	2.182789	1.1261728	6.131062986268597e-07	2.0758659173459903e-06	M2	1.1261728	tRNA (cytosine(34)-C(5))-methyltransferase putative
TGME49_254480	2.182687	1.1261053	0.011363114695346612	0.01540418387718547	M2	1.1261053	WD domain G-beta repeat-containing protein
TGME49_216740	2.181656	1.1254236	3.85519649026196e-05	8.928546324802364e-05	M2	1.1254236	riboflavin kinase
TGME49_209510	2.1814606	1.1252944	0.006863333043074475	0.009715582503688843	M2	1.1252944	hypothetical protein
TGME49_304700	2.1812735	1.1251707	7.309492724095631e-06	1.9704154070600377e-05	M2	1.1251707	hypothetical protein
TGME49_277530	2.1810863	1.1250468	0.0008497054336231131	0.0014574509071542377	M2	1.1250468	DNA topoisomerase domain-containing protein
TGME49_200450	2.1810832	1.1250448	1.3793324526073538e-06	4.347906958964844e-06	M2	1.1250448	hypothetical protein
TGME49_314265	2.1809204	1.124937	3.6076284287929878e-06	1.0416148907321332e-05	M2	1.124937	hypothetical protein
TGME49_238230	2.1808763	1.124908	0.00010715157378116581	0.0002236448382377457	M2	1.124908	Ser/Thr phosphatase family protein
TGME49_282150	2.1806846	1.1247811	2.429243998494338e-11	1.7621923631996267e-10	M2	1.1247811	hypothetical protein
TGME49_286910	2.1796255	1.1240803	0.0006172248861401333	0.0010928488398848242	M2	1.1240803	hypothetical protein
TGME49_277510	2.179005	1.1236694	1.5817829487964148e-08	7.288793729704745e-08	M2	1.1236694	cytoplasmic dynein intermediate chain
TGME49_265440	2.1789942	1.1236624	0.0009640380899787569	0.0016330098012448337	M2	1.1236624	hypothetical protein
TGME49_243340	2.1789339	1.1236224	6.880837025949376e-05	0.00015080382185243303	M2	1.1236224	atypical MEK-related kinase (incomplete catalytic triad)
TGME49_281470	2.178799	1.123533	0.014459998092044981	0.019205004538090858	M2	1.123533	hypothetical protein
TGME49_262550	2.1784275	1.1232871	0.017984496112094357	0.023400612262249335	M2	1.1232871	hypothetical protein
TGME49_227310	2.1781924	1.1231314	0.007877563527688244	0.01100930864436801	M2	1.1231314	hypothetical protein
TGME49_225960	2.177944	1.1229668	1.650121343341594e-05	4.120914737759991e-05	M2	1.1229668	STE kinase
TGME49_251790	2.1778388	1.1228971	0.00035986612923573184	0.0006720947310875513	M2	1.1228971	hypothetical protein
TGME49_268730	2.1777961	1.1228689	0.026750053166322823	0.03371081111073579	M2	1.1228689	glutaredoxin-related protein
TGME49_213010	2.177745	1.1228352	9.161835477536106e-07	2.9871401088216677e-06	M2	1.1228352	hypothetical protein
TGME49_238070	2.177639	1.1227648	0.003567874888785564	0.005332881267266856	M2	1.1227648	glutaredoxin domain-containing protein
TGME49_275840	2.1775408	1.1226997	1.0705093504315456e-05	2.7734134029727135e-05	M2	1.1226997	protein phosphatase 2C domain-containing protein
TGME49_271210	2.1773982	1.1226053	1.936857192844116e-08	8.739124472357515e-08	M2	1.1226053	4-alpha-glucanotransferase
TGME49_320570	2.1770825	1.1223961	2.7326496698493877e-11	1.9620749668561748e-10	M2	1.1223961	elongation factor Tu putative
TGME49_278760	2.1770554	1.1223781	0.00011058874328016335	0.00023013678144808187	M2	1.1223781	hypothetical protein
TGME49_259000	2.1767414	1.12217	2.897456096954849e-10	1.7756636312810315e-09	M2	1.12217	hypothetical protein
TGME49_249040	2.1766505	1.1221098	6.14156647128706e-05	0.00013576347959415888	M2	1.1221098	hypothetical protein
TGME49_244880	2.176483	1.1219987	5.922114626476412e-10	3.463514927913644e-09	M2	1.1219987	DNA-directed RNA polymerase I RPA1
TGME49_288680	2.1760385	1.1217041	8.765900907449763e-06	2.3200948502617582e-05	M2	1.1217041	endonuclease IV APN
TGME49_251510	2.175864	1.1215883	1.079918437151922e-05	2.7952192074642855e-05	M2	1.1215883	Ulp1 protease family C-terminal catalytic domain-containing protein
TGME49_220560	2.1755104	1.1213539	0.007117620947580138	0.010050294841771053	M2	1.1213539	hypothetical protein
TGME49_269400	2.1729083	1.1196272	0.0038199334213620275	0.005684496802946029	M2	1.1196272	oxidoreductase short chain dehydrogenase/reductase family protein
TGME49_244290	2.1726623	1.1194639	4.6311214749235036e-14	4.5089409659652685e-13	M2	1.1194639	adapter-related protein
TGME49_221660	2.172568	1.1194013	7.218575094523865e-07	2.404579350564493e-06	M2	1.1194013	DEAD/DEAH box helicase domain-containing protein
TGME49_262420	2.172346	1.119254	8.760189780428409e-07	2.869471466449631e-06	M2	1.119254	AP2 domain transcription factor APVIIb-1/ADA2-B
TGME49_205090	2.172009	1.1190301	3.905963581424531e-05	9.031271744628923e-05	M2	1.1190301	Toxoplasma gondii family D protein
TGME49_232540	2.171301	1.1185596	0.0038710524439691998	0.005757526259060843	M2	1.1185596	FAD binding domain-containing protein
TGME49_213650	2.1711786	1.1184784	8.686022268801091e-05	0.00018574284968025814	M2	1.1184784	ATP-binding domain 1 family protein
TGME49_315530	2.1708481	1.1182588	2.0855534639776552e-07	7.795228803217676e-07	M2	1.1182588	hypothetical protein
TGME49_213520	2.1697845	1.1175518	6.508141933995556e-05	0.00014315540729879344	M2	1.1175518	peptidase M20D amidohydrolase
TGME49_254410	2.169766	1.1175394	8.942081595048365e-06	2.3615478612423043e-05	M2	1.1175394	protein phosphatase 2C putative
TGME49_249560	2.169635	1.1174524	5.061539374021429e-07	1.7487763389147628e-06	M2	1.1174524	DNA-directed RNA polymerase alpha chain rpoA
TGME49_236780	2.1675797	1.116085	0.015515663548735337	0.020465564640293792	M2	1.116085	zinc finger C3HC4 type (RING finger) domain-containing protein
TGME49_244520	2.167376	1.1159495	9.783652350998249e-09	4.66337540994282e-08	M2	1.1159495	glycosyl transferase group 4 family protein
TGME49_314530	2.1667688	1.1155453	8.3713688757782e-11	5.597028351993795e-10	M2	1.1155453	RPAP1 family C-terminal protein
TGME49_230555	2.1657512	1.1148676	4.1857111398042985e-08	1.7802438269998053e-07	M2	1.1148676	adenylate and guanylate cyclase catalytic domain-containing protein
TGME49_276860	2.165718	1.1148455	1.6966868277383113e-10	1.0838019940450845e-09	M2	1.1148455	hypothetical protein
TGME49_297745	2.1655698	1.1147467	4.174132939129843e-07	1.4612923557823656e-06	M2	1.1147467	hypothetical protein
TGME49_250780	2.1648562	1.1142712	8.461174857708577e-07	2.786648040627248e-06	M2	1.1142712	Zn-finger in ubiquitin-hydrolases domain-containing protein
TGME49_240260	2.1646593	1.1141399	0.00036583038068220043	0.0006821784084610052	M2	1.1141399	hypothetical protein
TGME49_261790	2.1639445	1.1136634	0.0009249632440313639	0.0015728097334625868	M2	1.1136634	hypothetical protein
TGME49_293500	2.1635532	1.1134026	2.79641005601788e-12	2.281125616158987e-11	M2	1.1134026	hypothetical protein
TGME49_263870	2.1634564	1.1133381	2.2474585267172222e-08	1.0017548528105087e-07	M2	1.1133381	glutamate-tRNA ligase
TGME49_256980	2.1626856	1.112824	5.127308892620535e-06	1.428647789368155e-05	M2	1.112824	glycerol-3-phosphate-acyltransferase
TGME49_202240	2.162245	1.11253	3.109501112123445e-07	1.1172786521494572e-06	M2	1.11253	RAP domain-containing protein
TGME49_315460	2.161892	1.1122944	7.625987247411085e-05	0.00016537649019212494	M2	1.1122944	hypothetical protein
TGME49_255360	2.1618388	1.1122589	0.036279998664416904	0.044447994884457415	M2	1.1122589	hypothetical protein
TGME49_283550	2.1617315	1.1121874	1.8813307552269878e-14	1.901809355553023e-13	M2	1.1121874	hypothetical protein
TGME49_204310	2.161295	1.1118959	1.0977558601852069e-09	6.131615845621404e-09	M2	1.1118959	hypothetical protein
TGME49_318320	2.1611786	1.1118183	4.340222422368867e-05	9.93747485544278e-05	M2	1.1118183	ATP-dependent Clp endopeptidase proteolytic subunit ClpP domain-containing protein
TGME49_228340	2.1611044	1.1117688	3.466645561685188e-09	1.784203510462943e-08	M2	1.1117688	hypothetical protein
TGME49_217390	2.1597397	1.1108575	0.0007393080293484311	0.00128875663284315	M2	1.1108575	hypothetical protein
TGME49_235490	2.1594944	1.1106936	5.265471450251148e-06	1.4628040508242093e-05	M2	1.1106936	hypothetical protein
TGME49_235515	2.1591234	1.1104457	1.2515452554794532e-06	3.974749700885705e-06	M2	1.1104457	MORN repeat-containing protein
TGME49_285540	2.159092	1.1104246	7.206593899276402e-05	0.00015708776126588825	M2	1.1104246	DNA-directed DNA polymerase
TGME49_221840	2.1590233	1.1103787	9.164744471215127e-06	2.4128116986367306e-05	M2	1.1103787	hypothetical protein
TGME49_210750	2.1584594	1.1100019	5.984286169466419e-05	0.00013273806408966066	M2	1.1100019	Ferredoxin-fold anticodon binding domain-containing protein
TGME49_211150	2.158258	1.1098673	2.0134981152260555e-07	7.535904593346056e-07	M2	1.1098673	hypothetical protein
TGME49_289550	2.158178	1.1098139	0.012413447846453969	0.016694151456139797	M2	1.1098139	WD domain G-beta repeat-containing protein
TGME49_278420	2.158102	1.109763	1.0212845812055566e-06	3.2967440778335213e-06	M2	1.109763	Toxoplasma gondii family A protein
TGME49_225400	2.157741	1.1095217	0.012331753509959366	0.01660013522023998	M2	1.1095217	hypothetical protein
TGME49_259200	2.1571627	1.1091349	1.4230482309073987e-09	7.768850516407252e-09	M2	1.1091349	Na+/H+ exchanger NHE1
TGME49_251450	2.1570466	1.1090573	1.0720074616546151e-06	3.4473116660742587e-06	M2	1.1090573	hypothetical protein
TGME49_229630	2.1568606	1.108933	1.2639352907075724e-10	8.248275785150344e-10	M2	1.108933	eIF2 kinase IF2K-A (incomplete catalytic triad)
TGME49_219200	2.1567278	1.108844	7.31309158121384e-10	4.210009329212409e-09	M2	1.108844	DEAD/DEAH box RNA helicase family protein
TGME49_244380	2.1561	1.1084241	0.000644680139124306	0.0011390741910389944	M2	1.1084241	cactin
TGME49_230605	2.1560566	1.1083951	0.00047153900176199933	0.0008592014023050143	M2	1.1083951	hypothetical protein
TGME49_207910	2.1555994	1.1080891	1.8296238406047736e-08	8.290697628391926e-08	M2	1.1080891	manganese resistance 1 protein putative
TGME49_209180	2.1554756	1.1080062	4.5341502317213485e-05	0.00010325546647339562	M2	1.1080062	PAN domain-containing protein
TGME49_289200	2.1551309	1.1077754	2.6645967527009287e-07	9.702071157723201e-07	M2	1.1077754	RAP domain-containing protein
TGME49_232980	2.1550817	1.1077425	0.00028365122180482575	0.0005403824336051809	M2	1.1077425	hypothetical protein
TGME49_213860	2.1549337	1.1076435	0.027854037130963592	0.03495611342348876	M2	1.1076435	hypothetical protein
TGME49_272905	2.1548967	1.1076187	0.003113701032768249	0.004711528635259529	M2	1.1076187	hypothetical protein
TGME49_267840	2.1547422	1.1075153	6.229116323489503e-07	2.1056904819923915e-06	M2	1.1075153	tetratricopeptide repeat-containing protein
TGME49_218580	2.1546397	1.1074467	4.855206581121832e-09	2.4379887591836367e-08	M2	1.1074467	RNA methyltransferase TrmH family protein
TGME49_281570	2.1544836	1.1073421	2.6575667265452876e-06	7.919286461930262e-06	M2	1.1073421	hypothetical protein
TGME49_355250	2.1542306	1.1071727	0.0011300263892959864	0.001880632732560138	M2	1.1071727	tRNA-Phe
TGME49_309790	2.1540418	1.1070462	2.708869266629378e-05	6.477830835394701e-05	M2	1.1070462	hypothetical protein
TGME49_259965	2.1537955	1.1068813	1.2171526212351046e-05	3.120800000624354e-05	M2	1.1068813	Bardet-Biedl syndrome 5 putative
TGME49_276170	2.153688	1.1068093	5.391364472947288e-11	3.7072759284684727e-10	M2	1.1068093	phosphatidylinositol 3- and 4-kinase
TGME49_240830	2.1536236	1.1067661	0.0029246214027402137	0.004454934296063004	M2	1.1067661	hydrolase alpha/beta fold family protein
TGME49_287235	2.1530561	1.106386	0.0027321590748884757	0.0041859094165849365	M2	1.106386	hypothetical protein
TGME49_209020	2.153033	1.1063704	2.9813342181729817e-05	7.05354296690366e-05	M2	1.1063704	hypothetical protein
TGME49_244300	2.1528811	1.1062686	1.3550850055652518e-08	6.313022812586518e-08	M2	1.1062686	hypothetical protein
TGME49_204010	2.1522624	1.105854	0.00045950130431231516	0.0008388951226492494	M2	1.105854	hypothetical protein
TGME49_213480	2.1518843	1.1056005	4.054427848836594e-07	1.4241051434130528e-06	M2	1.1056005	hypothetical protein
TGME49_241170	2.1517124	1.1054853	0.00013158748243230942	0.00026952152545696727	M2	1.1054853	hypothetical protein
TGME49_225450	2.1515512	1.1053772	0.001073687882327509	0.0017950022341344765	M2	1.1053772	hypothetical protein
TGME49_235180	2.151379	1.1052618	0.001173848446267076	0.0019436115241777152	M2	1.1052618	hypothetical protein
TGME49_314970	2.1511266	1.1050924	0.013436901839868919	0.017939219186213624	M2	1.1050924	root hair defective 3 gtp-binding protein (rhd3) protein
TGME49_217780	2.1508744	1.1049232	3.1896055545309417e-07	1.1441153031129452e-06	M2	1.1049232	Sec20 protein
TGME49_260790	2.1506102	1.1047461	0.004939592402975631	0.0071824665171278486	M2	1.1047461	RAP domain-containing protein
TGME49_203900	2.1500945	1.1044	2.0218155061898235e-06	6.14838533386477e-06	M2	1.1044	hypothetical protein
TGME49_263420	2.1498537	1.1042385	9.527807509705175e-09	4.551695944856893e-08	M2	1.1042385	ubiquitin-specific protease USP4
TGME49_247370	2.1495938	1.1040641	0.0001600166430680553	0.0003215170353229042	M2	1.1040641	hypothetical protein
TGME49_240080	2.1484072	1.1032674	6.721871865695487e-08	2.754924303442898e-07	M2	1.1032674	hypothetical protein
TGME49_231170	2.1483667	1.1032403	2.208190281969869e-07	8.188423024540309e-07	M2	1.1032403	RecF/RecN/SMC N terminal domain-containing protein
TGME49_203570	2.1479623	1.1029687	0.014055602769037705	0.01871201937636069	M2	1.1029687	acyltransferase domain-containing protein
TGME49_213680	2.1474347	1.1026143	0.0003097924111406327	0.0005853019598813966	M2	1.1026143	MmgE/PrpD family protein
TGME49_226110	2.1474206	1.1026049	0.00020061048127951683	0.00039472856281564533	M2	1.1026049	Copper-exporting ATPase
TGME49_272760	2.1469038	1.1022575	0.008089172739195216	0.011282653708357612	M2	1.1022575	hypothetical protein
TGME49_211610	2.1466722	1.1021019	0.002950707941428206	0.0044898150545570345	M2	1.1021019	hypothetical protein
TGME49_267760	2.146527	1.1020043	5.19477785122563e-11	3.5837606220985957e-10	M2	1.1020043	hypothetical protein
TGME49_309100	2.1464334	1.1019413	1.698316364537325e-07	6.436085917804903e-07	M2	1.1019413	hypothetical protein
TGME49_285260	2.1463046	1.1018548	0.008219886231204659	0.011438540843061184	M2	1.1018548	hypothetical protein
TGME49_311210	2.146137	1.1017421	6.010132055249127e-06	1.6522975276158222e-05	M2	1.1017421	hypothetical protein
TGME49_222330	2.1460686	1.1016961	2.0342567529088857e-08	9.139555459241358e-08	M2	1.1016961	hypothetical protein
TGME49_276100	2.1457593	1.1014882	0.0029591622600968494	0.004500248382234745	M2	1.1014882	hypothetical protein
TGME49_268390	2.1452477	1.1011442	0.012936707187068698	0.017328913050866628	M2	1.1011442	hypothetical protein
TGME49_244728	2.1448584	1.1008824	0.00122372913377183	0.002019475670670911	M2	1.1008824	IQ calmodulin-binding motif domain-containing protein
TGME49_278750	2.1448133	1.100852	0.020939072575583893	0.026872604758733407	M2	1.100852	AT hook motif domain-containing protein
TGME49_262780	2.1443279	1.1005255	9.14877040610167e-09	4.3954666686734065e-08	M2	1.1005255	FHA domain-containing protein
TGME49_252270	2.1443048	1.10051	0.029685372895683022	0.03704534647687791	M2	1.10051	L1P family of ribosomal protein
TGME49_272010	2.1441565	1.1004102	0.003523179326478451	0.005277275520749626	M2	1.1004102	Gar1 protein RNA binding region protein
TGME49_215140	2.1441324	1.100394	0.001991013741281629	0.003149177826608843	M2	1.100394	hypothetical protein
TGME49_231460	2.14373	1.1001232	0.0004969138042652065	0.0009019369759117827	M2	1.1001232	hypothetical protein
TGME49_212140	2.1433449	1.099864	3.5676371010610814e-06	1.030772688583494e-05	M2	1.099864	hypothetical protein
TGME49_209730	2.1432965	1.0998315	6.85343184124081e-08	2.796637010638633e-07	M2	1.0998315	hypothetical protein
TGME49_243480	2.1430726	1.0996807	3.311612441525322e-05	7.752475552169112e-05	M2	1.0996807	50S ribosomal protein L3 putative
TGME49_289222	2.1426892	1.0994226	0.00030415377075577505	0.0005761944668587884	M2	1.0994226	hypothetical protein
TGME49_314515	2.1424425	1.0992565	0.00438391148231432	0.00643760832963307	M2	1.0992565	hypothetical protein
TGME49_295390	2.1423836	1.0992168	0.016707058001838162	0.021876564483039092	M2	1.0992168	hypothetical protein
TGME49_224940	2.1417131	1.0987653	0.0002394758579190043	0.00046385754647570597	M2	1.0987653	hypothetical protein
TGME49_244430	2.1407523	1.0981178	5.3962400618998664e-05	0.00012112516537348146	M2	1.0981178	pseudouridylate synthase putative
TGME49_273500	2.1403508	1.0978472	2.5840312230293374e-07	9.445349422932929e-07	M2	1.0978472	O-linked N-acetylglucosamine transferase
TGME49_203735	2.140306	1.0978171	0.006940342077379375	0.009816373371704285	M2	1.0978171	hypothetical protein
TGME49_202720	2.1402905	1.0978066	1.9806793212099453e-11	1.4580767372426175e-10	M2	1.0978066	RNB family domain-containing protein
TGME49_219430	2.1402507	1.0977798	0.003581938689040757	0.005352955589935179	M2	1.0977798	tRNA ligase class II core domain (G H P S and T) domain-containing protein
TGME49_243160	2.1400025	1.0976125	0.00041808600341251606	0.0007697701121653972	M2	1.0976125	Toxoplasma gondii family A protein
TGME49_297500	2.1399665	1.0975882	2.4389566679032687e-08	1.0797078470639352e-07	M2	1.0975882	T-complex protein 1 eta subunit
TGME49_238210	2.1387866	1.0967925	0.005084613541373381	0.007379369575501707	M2	1.0967925	EGF family domain-containing protein
TGME49_264790	2.138429	1.0965513	2.2110326403510557e-12	1.8373094241501254e-11	M2	1.0965513	hypothetical protein
TGME49_321490	2.1383424	1.0964929	6.360204360319681e-09	3.1377750758354717e-08	M2	1.0964929	SAG-related sequence SRS12A
TGME49_260170	2.1378438	1.0961565	0.0003993767158893267	0.0007380565549924994	M2	1.0961565	elongation factor EF-G putative
TGME49_217760	2.137062	1.0956289	1.32571271414921e-06	4.1929633784711725e-06	M2	1.0956289	GTP-binding protein
TGME49_271370	2.1370285	1.0956061	8.566700769867824e-09	4.1440863312050934e-08	M2	1.0956061	hypothetical protein
TGME49_231480	2.1365347	1.0952728	1.0731527388074027e-12	9.179366189940649e-12	M2	1.0952728	GCN1 putative
TGME49_253755	2.1360276	1.0949303	0.0007546157776324522	0.0013116532161192623	M2	1.0949303	hypothetical protein
TGME49_305320	2.1356635	1.0946844	0.024080095324922276	0.030610843199596595	M2	1.0946844	mRNA capping enzyme
TGME49_268800	2.1354456	1.0945371	0.03070155766880959	0.038166940844235046	M2	1.0945371	hypothetical protein
TGME49_255970	2.1351008	1.0943042	8.76948236045191e-09	4.2349083101816624e-08	M2	1.0943042	histone lysine methyltransferase SET/SUV39
TGME49_317720	2.1344485	1.0938634	1.3531153819757438e-10	8.782778873331037e-10	M2	1.0938634	eukaryotic translation initiation factor 3 subunit 7 putative
TGME49_228510	2.1341405	1.0936551	1.7379760788595572e-08	7.926408981350307e-08	M2	1.0936551	hypothetical protein
TGME49_232960	2.133995	1.0935569	0.005234055829101898	0.007571551833574143	M2	1.0935569	oxidoreductase 2OG-Fe(II) oxygenase family protein
TGME49_239670	2.1338863	1.0934833	0.002918861903314526	0.004448566626674672	M2	1.0934833	hypothetical protein
TGME49_265230	2.1334739	1.0932045	2.6978537227140146e-06	8.011089884278333e-06	M2	1.0932045	electron transfer flavoprotein-ubiquinone oxidoreductase
TGME49_226900	2.1333184	1.0930994	0.008266916320986126	0.01150019914874959	M2	1.0930994	hypothetical protein
TGME49_209140	2.132244	1.0923727	0.004657032906065689	0.00681027601473631	M2	1.0923727	anti-silencing protein ASF1 family protein
TGME49_211700	2.1313474	1.0917658	0.00023236825170498603	0.000451020692503178	M2	1.0917658	hypothetical protein
TGME49_309080	2.1311297	1.0916184	3.280987852185859e-05	7.687171704691626e-05	M2	1.0916184	hypothetical protein
TGME49_295410	2.13056	1.0912327	1.036876317232616e-06	3.344519754554518e-06	M2	1.0912327	transcription initiation factor TFIID complex subunit TAF6
TGME49_211460	2.1304078	1.0911297	4.512583397191123e-06	1.2737422274436266e-05	M2	1.0911297	hypothetical protein
TGME49_288050	2.1298814	1.0907731	7.341516360055981e-10	4.2234958991717565e-09	M2	1.0907731	intraflagellar transport protein 172 putative
TGME49_209520	2.129874	1.0907681	3.0056380896274977e-06	8.859660793666544e-06	M2	1.0907681	WD domain G-beta repeat-containing protein
TGME49_229350	2.1294892	1.0905074	7.664699134209958e-08	3.0874343366638873e-07	M2	1.0905074	HEAT repeat-containing protein
TGME49_219678	2.1292808	1.0903662	0.0011165355989232542	0.0018607458778348296	M2	1.0903662	hypothetical protein
TGME49_217182	2.1292796	1.0903654	2.6011568339209175e-12	2.134211301307347e-11	M2	1.0903654	RNA-dependent RNA polymerase RDP
TGME49_275630	2.1291184	1.0902562	3.706611447984606e-05	8.615119182320657e-05	M2	1.0902562	HECT-domain (ubiquitin-transferase) domain-containing protein
TGME49_248140	2.1290002	1.0901761	0.00887524869249102	0.01226569529030934	M2	1.0901761	hypothetical protein
TGME49_289510	2.1288674	1.0900861	4.742383138998977e-08	1.9969048284843226e-07	M2	1.0900861	hypothetical protein
TGME49_239250	2.1288235	1.0900563	0.0011438051645131131	0.0019001960773147866	M2	1.0900563	diacylglycerol kinase putative
TGME49_320430	2.1284688	1.0898159	4.773586332932907e-07	1.6540212422966787e-06	M2	1.0898159	cell-cycle-control protein (translation regulation) putative
TGME49_236930	2.1283596	1.089742	2.3037858546930296e-15	2.5252002928678075e-14	M2	1.089742	hypothetical protein
TGME49_260200	2.1279876	1.0894897	0.0025268606858686545	0.00389894096335147	M2	1.0894897	helicase associated domain (ha2) protein
TGME49_293380	2.1278734	1.0894123	0.002187667425515803	0.0034268725510721134	M2	1.0894123	histone lysine acetyltransferase HAT1
TGME49_287250	2.1278112	1.0893701	0.037180575261314866	0.04544591286279606	M2	1.0893701	hypothetical protein
TGME49_295130	2.1275578	1.0891984	4.767975896753683e-06	1.3391214457781778e-05	M2	1.0891984	hypothetical protein
TGME49_280390	2.1273324	1.0890455	8.816168230323308e-09	4.255022142459296e-08	M2	1.0890455	HEAT repeat-containing protein
TGME49_205210	2.1262972	1.0883433	0.005888924005522354	0.008445154720968847	M2	1.0883433	hypothetical protein
TGME49_314480	2.1259892	1.0881343	1.4646831026768463e-06	4.586156687929614e-06	M2	1.0881343	hypothetical protein
TGME49_318620	2.1255069	1.0878069	8.911355068422254e-06	2.355641591593258e-05	M2	1.0878069	RNA-directed RNA polymerase
TGME49_218362	2.1254025	1.087736	0.00032102596155157036	0.0006053079877448284	M2	1.087736	zinc finger protein ZFP1
TGME49_204500	2.124215	1.0869297	0.0004109444585466917	0.0007574463727760287	M2	1.0869297	hypothetical protein
TGME49_269860	2.1238785	1.0867013	0.0012451776176508422	0.002050466883625734	M2	1.0867013	hypothetical protein
TGME49_262880	2.1232555	1.086278	3.7054071358783056e-12	2.9880148573766755e-11	M2	1.086278	hypothetical protein
TGME49_242610	2.1232255	1.0862576	0.0028204822098203495	0.004312628036039764	M2	1.0862576	WD domain G-beta repeat-containing protein
TGME49_304760	2.123107	1.0861771	0.0006523947472964932	0.0011500600770552073	M2	1.0861771	RNA recognition motif-containing protein
TGME49_217170	2.1226099	1.0858393	0.0026049219480605286	0.004009141391924882	M2	1.0858393	hypothetical protein
TGME49_288320	2.1224473	1.0857286	0.01690123888419633	0.022113697137380893	M2	1.0857286	adenylate kinase
TGME49_319680	2.121564	1.0851282	0.001447304652609035	0.002347633708099607	M2	1.0851282	hypothetical protein
TGME49_262130	2.1215277	1.0851035	3.933734925135529e-05	9.085540817797311e-05	M2	1.0851035	hypothetical protein
TGME49_307045	2.121351	1.0849833	0.0001400579859457124	0.00028507467226089004	M2	1.0849833	Toxoplasma gondii family B protein
TGME49_243655	2.1212962	1.084946	7.025844268557069e-06	1.9018388825616845e-05	M2	1.084946	GMC oxidoreductase
TGME49_221890	2.1212454	1.0849115	0.0004892319344002867	0.0008887573253690504	M2	1.0849115	WD domain G-beta repeat-containing protein
TGME49_254780	2.1210485	1.0847776	0.00403358018446103	0.005970885643524288	M2	1.0847776	hypothetical protein
TGME49_288530	2.1208134	1.0846176	2.026775816271048e-06	6.161252670254182e-06	M2	1.0846176	NOL1/NOP2/sun family protein
TGME49_273580	2.120768	1.0845869	4.550724470385787e-11	3.165281687179447e-10	M2	1.0845869	hypothetical protein
TGME49_312970	2.1207633	1.0845836	1.929264758636169e-06	5.890251616775385e-06	M2	1.0845836	hypothetical protein
TGME49_238915	2.1202765	1.0842524	1.1067185116600779e-07	4.322032413142014e-07	M2	1.0842524	hypothetical protein
TGME49_266280	2.1201534	1.0841687	3.471283005220429e-08	1.5005530781134446e-07	M2	1.0841687	HEAT repeat-containing protein
TGME49_206470	2.119869	1.0839751	6.46678774968328e-08	2.6607022041174976e-07	M2	1.0839751	pyruvate dehydrogenase complex subunit PDH-E3II
TGME49_271625	2.1190233	1.0833994	0.00021257412660509713	0.00041575189630633553	M2	1.0833994	serine--tRNA ligase
TGME49_202400	2.118706	1.0831834	2.08816065408222e-12	1.740339811405211e-11	M2	1.0831834	calcium binding egf domain-containing protein
TGME49_219520	2.1183982	1.0829738	0.009751056444642147	0.013364608824792536	M2	1.0829738	histone arginine methyltransferase PRMT1
TGME49_316180	2.1180348	1.0827264	0.0008596809820909235	0.001472171019179411	M2	1.0827264	hypothetical protein
TGME49_221665	2.1177258	1.0825158	0.01946060777525352	0.025143188550476606	M2	1.0825158	hypothetical protein
TGME49_267790	2.117471	1.0823421	6.0052902359900004e-05	0.00013316900494450668	M2	1.0823421	hypothetical protein
TGME49_295440	2.1174698	1.0823414	0.0011387848466710593	0.0018933446270346494	M2	1.0823414	hypothetical protein
TGME49_235640	2.117051	1.0820559	1.0392112218312945e-05	2.7006070220468233e-05	M2	1.0820559	formyl transferase domain-containing protein
TGME49_229230	2.1165872	1.0817399	0.034784888625953296	0.04274641468342756	M2	1.0817399	hypothetical protein
TGME49_249910	2.1152697	1.0808415	0.0002186595506908283	0.0004268634471906191	M2	1.0808415	mitochondria-associated granulocyte macrophage CSF signaling molecule putative
TGME49_249530	2.1152673	1.08084	1.3564243106541775e-05	3.4423849397412776e-05	M2	1.08084	exportin 1 putative
TGME49_273040	2.1152108	1.0808015	0.004119172381833822	0.006082670941617619	M2	1.0808015	hypothetical protein
TGME49_250930	2.1150873	1.0807172	1.0711484023924315e-05	2.7742185561196562e-05	M2	1.0807172	hypothetical protein
TGME49_213000	2.115014	1.0806673	0.015648277358315036	0.020611532411957664	M2	1.0806673	replication factor C subunit 5 putative
TGME49_269060	2.114693	1.0804482	6.485479774321147e-07	2.1827474939381924e-06	M2	1.0804482	hypothetical protein
TGME49_269630	2.1144311	1.0802696	4.131475305680929e-07	1.447557952251639e-06	M2	1.0802696	hypothetical protein
TGME49_242790	2.1143663	1.0802253	7.025909139455313e-17	8.901942749255899e-16	M2	1.0802253	trichohyalin putative
TGME49_277220	2.1143475	1.0802125	1.5277362325794912e-08	7.051282851736362e-08	M2	1.0802125	hypothetical protein
TGME49_214200	2.1143136	1.0801893	0.006977306160525391	0.009867003742068286	M2	1.0801893	WD domain G-beta repeat-containing protein
TGME49_237530	2.1133957	1.0795629	4.745509754050842e-11	3.287237945203579e-10	M2	1.0795629	hypothetical protein
TGME49_248820	2.112817	1.0791678	0.012051691798712877	0.016246426446151305	M2	1.0791678	hypothetical protein
TGME49_304480	2.11275	1.0791221	0.003145564884325109	0.0047520859559226835	M2	1.0791221	3-oxo-5-alpha-steroid 4-dehydrogenase
TGME49_221630	2.1127274	1.0791067	1.2510951389070456e-06	3.974813916880994e-06	M2	1.0791067	hypothetical protein
TGME49_320005	2.1126702	1.0790676	0.0003044181806825398	0.0005765661239238333	M2	1.0790676	hypothetical protein
TGME49_223125	2.1118367	1.0784982	0.017494279943686797	0.022801381832834228	M2	1.0784982	ubiquitin family protein
TGME49_280790	2.1117675	1.078451	1.1526030859645103e-09	6.4083214996618925e-09	M2	1.078451	phosphatidylinositol n-acetylglucosaminyltransferase
TGME49_272430	2.1114213	1.0782145	2.04833824718888e-11	1.5052614371298458e-10	M2	1.0782145	MAC/Perforin domain-containing protein
TGME49_277150	2.1111186	1.0780076	0.00014664918589452454	0.00029720198321214075	M2	1.0780076	XPG N-terminal domain-containing protein
TGME49_297380	2.1110175	1.0779386	7.272165743173148e-06	1.961604618434608e-05	M2	1.0779386	hypothetical protein
TGME49_206500	2.1105578	1.0776243	4.456661346763676e-09	2.257988311840517e-08	M2	1.0776243	hypothetical protein
TGME49_259090	2.1101832	1.0773683	0.0044613749529980136	0.006545673563851773	M2	1.0773683	ubiquitin-conjugating enzyme subfamily protein
TGME49_309580	2.110174	1.077362	0.0005188015339665953	0.0009354366894712389	M2	1.077362	transporter major facilitator family protein
TGME49_279405	2.110046	1.0772744	0.005030703330307774	0.007306147764982128	M2	1.0772744	hypothetical protein
TGME49_295770	2.1100152	1.0772533	2.8608241354639546e-05	6.814212167081702e-05	M2	1.0772533	hypothetical protein
TGME49_311280	2.109952	1.0772102	0.03320300908306502	0.040927454749268156	M2	1.0772102	hypothetical protein
TGME49_242435	2.1097815	1.0770936	1.8260922419411207e-10	1.158581496745076e-09	M2	1.0770936	hypothetical protein
TGME49_263750	2.1095278	1.0769202	0.03260127150778512	0.040226798877543005	M2	1.0769202	hypothetical protein
TGME49_311370	2.1086404	1.0763131	6.632021467512654e-05	0.00014572858404043017	M2	1.0763131	methylmalonate-semialdehyde dehydrogenase [acylating] putative
TGME49_262650	2.1080048	1.0758781	1.900995781289603e-07	7.136968168671007e-07	M2	1.0758781	WD domain G-beta repeat-containing protein
TGME49_202260	2.1078944	1.0758026	0.00036598362588978505	0.0006823136162352909	M2	1.0758026	hypothetical protein
TGME49_242055	2.107688	1.0756613	7.724197477146022e-10	4.4345919075652875e-09	M2	1.0756613	DEAD/DEAH box helicase domain-containing protein
TGME49_227290	2.1071718	1.075308	7.107725573829442e-05	0.0001551727946898285	M2	1.075308	histone deacetylase HDAC3
TGME49_312190	2.1068213	1.075068	7.814821213996193e-05	0.00016869234758488334	M2	1.075068	hypothetical protein
TGME49_230667	2.106516	1.0748588	0.020606354953570962	0.026465699956326475	M2	1.0748588	hypothetical protein
TGME49_215670	2.1062663	1.0746878	1.5694579264417012e-09	8.518618456235592e-09	M2	1.0746878	cAMP-dependent protein kinase
TGME49_304500	2.1059957	1.0745025	7.695956188871694e-05	0.00016659458440613392	M2	1.0745025	hypothetical protein
TGME49_223258	2.105838	1.0743945	0.020663554057940847	0.026531099262178382	M2	1.0743945	hypothetical protein
TGME49_207980	2.105764	1.0743437	0.00025145367500757946	0.0004850570663065633	M2	1.0743437	PIG-P protein
TGME49_209960	2.1056468	1.0742635	5.976930069810728e-13	5.2288857163530504e-12	M2	1.0742635	glycosyltransferase
TGME49_216210	2.105228	1.0739764	2.983444915874035e-16	3.571259629469047e-15	M2	1.0739764	hypothetical protein
TGME49_278550	2.105225	1.0739745	9.434627437958659e-07	3.0630824617052872e-06	M2	1.0739745	elongation factor Tu GTP binding domain-containing protein
TGME49_215890	2.1039026	1.0730679	0.0010600401840019553	0.001773238241290682	M2	1.0730679	hypothetical protein
TGME49_300350	2.103428	1.0727423	2.7539129714773164e-08	1.2121520063518125e-07	M2	1.0727423	cysteine desulfurase/selenocysteine lyase family PLP dependent transferase superfamily protein
TGME49_355050	2.103198	1.0725847	0.00761795006805248	0.010692459064127474	M2	1.0725847	tRNA-Tyr
TGME49_310990	2.1028638	1.0723554	0.003512788328797549	0.0052635769799056886	M2	1.0723554	hypothetical protein
TGME49_266600	2.1024194	1.0720505	0.03780729030069354	0.04617188010565912	M2	1.0720505	Kazal-type serine protease inhibitor domain-containing protein
TGME49_297510	2.102131	1.0718524	8.125728186829045e-08	3.2560705977663476e-07	M2	1.0718524	hypothetical protein
[truncated: 4,969 more rows]
