# Supplementary figures and images for: A single-parasite transcriptional atlas of Toxoplasma Gondii reveals novel control of antigen expression
Source: eLife journal article supplement (doi:10.7554/elife.54129), 2020-02-17

**a**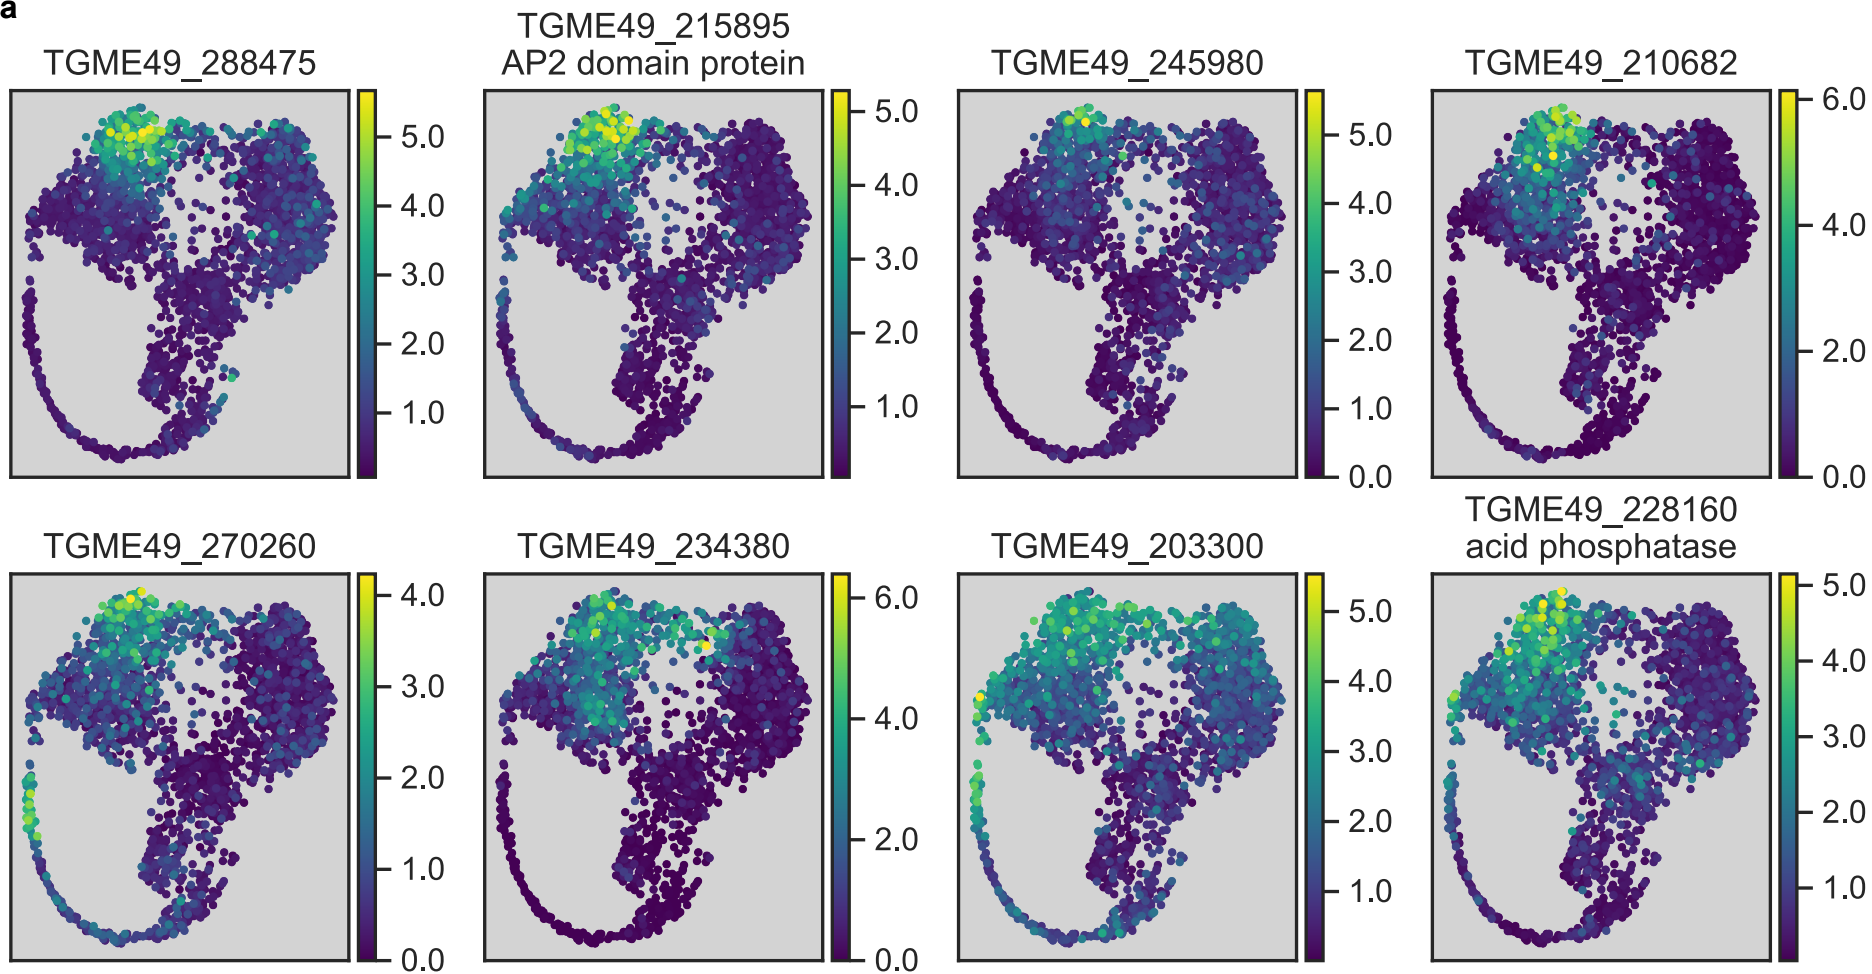**b**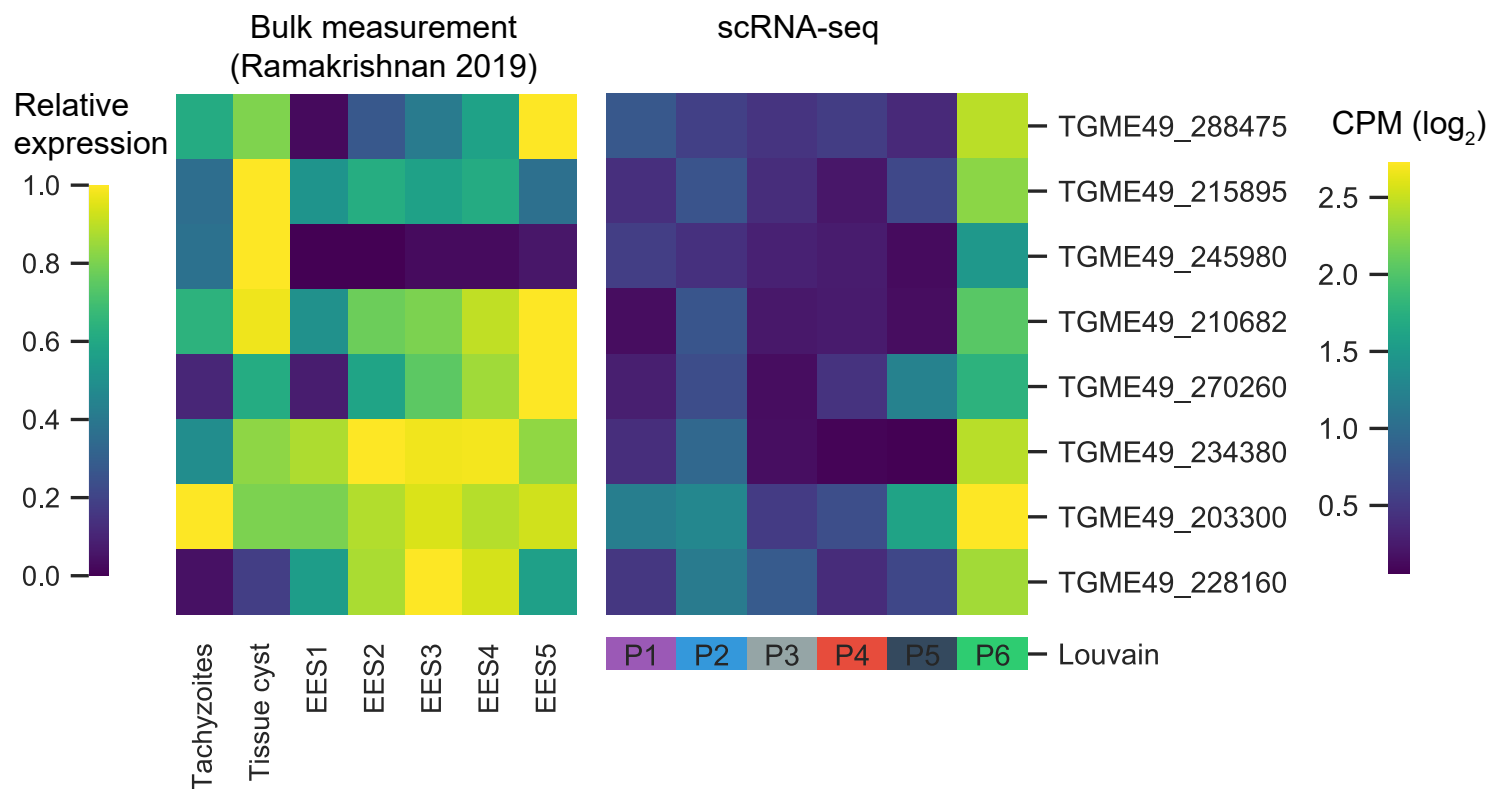

Supplement: supp [file elife-54129-supp-v1.zip › elife_poa_e54129_Figure_3_figure_supplement_3.pdf]

**a**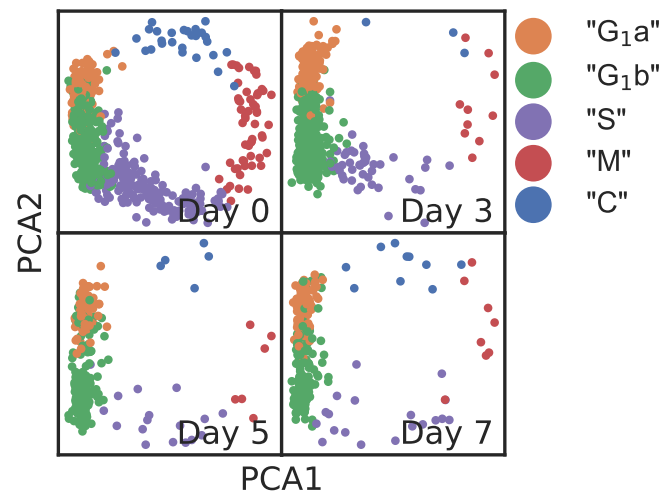**b**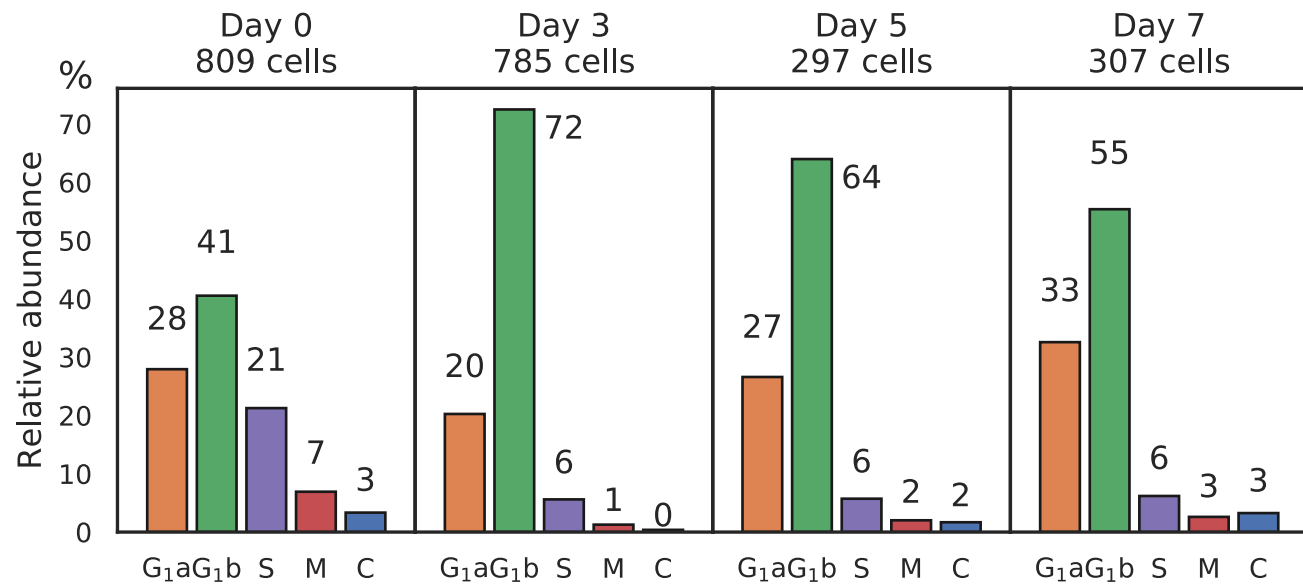**c**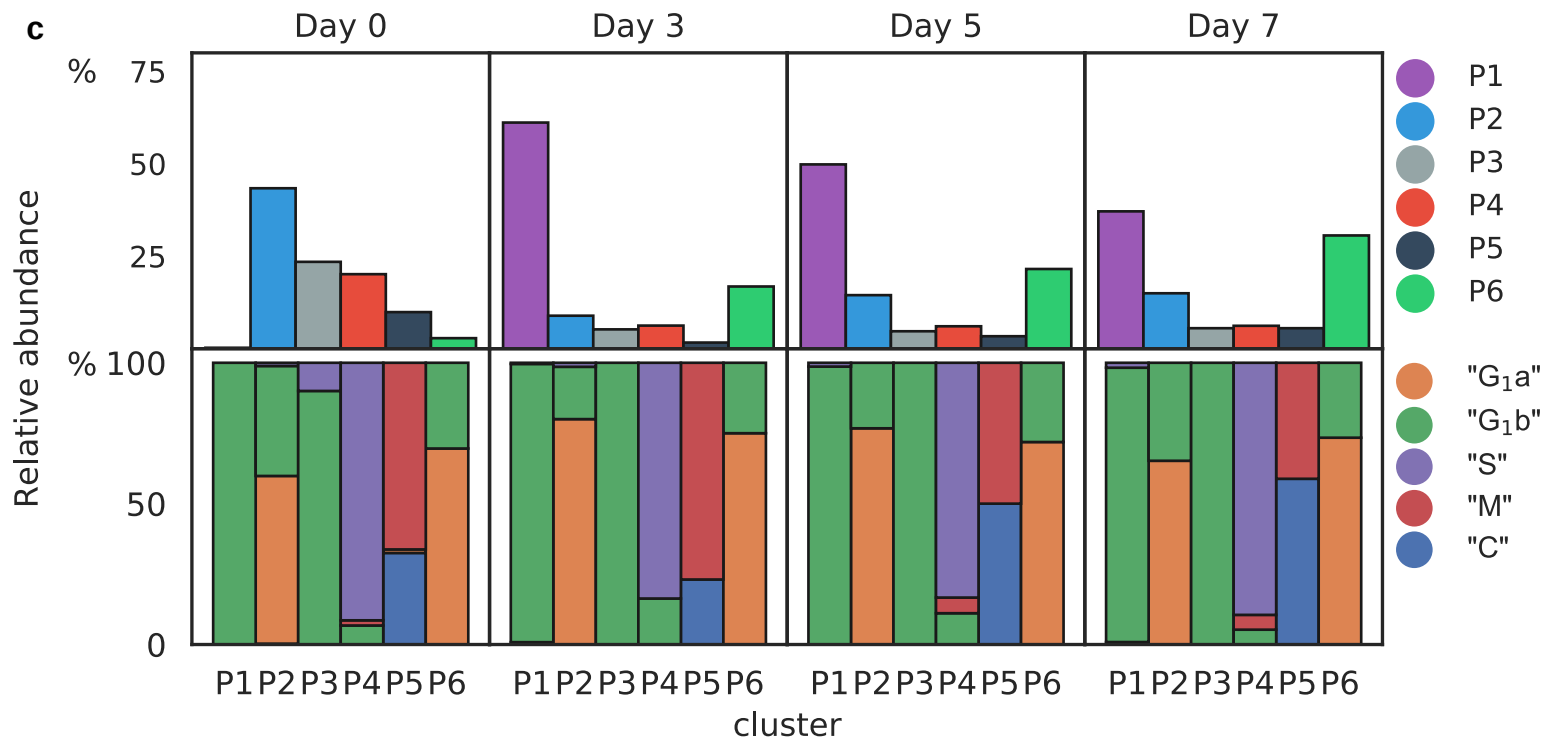**d**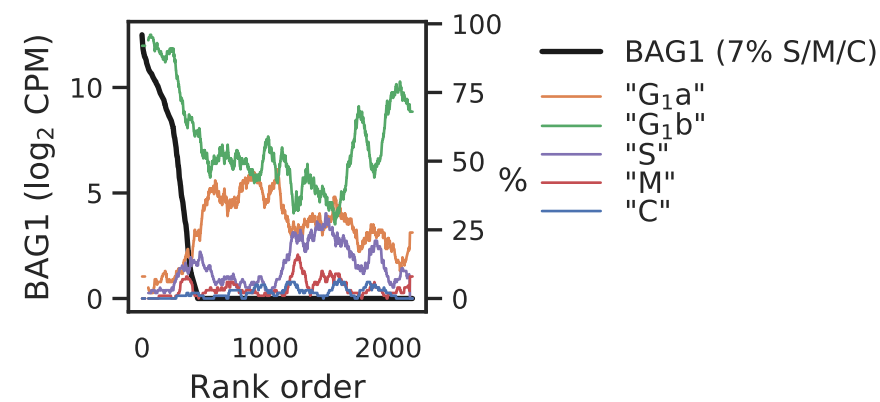

Supplement: supp [file elife-54129-supp-v1.zip › elife_poa_e54129_Figure_3_figure_supplement_1.pdf]

**a**

ME49

Pru

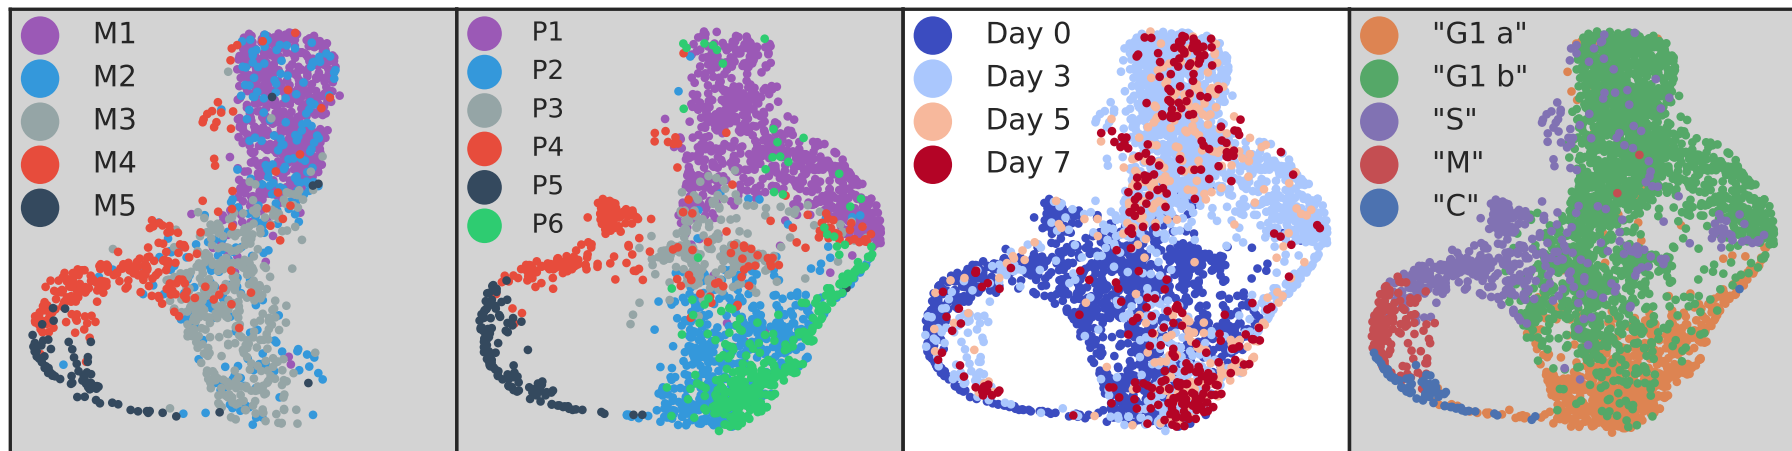**b**

Correlation

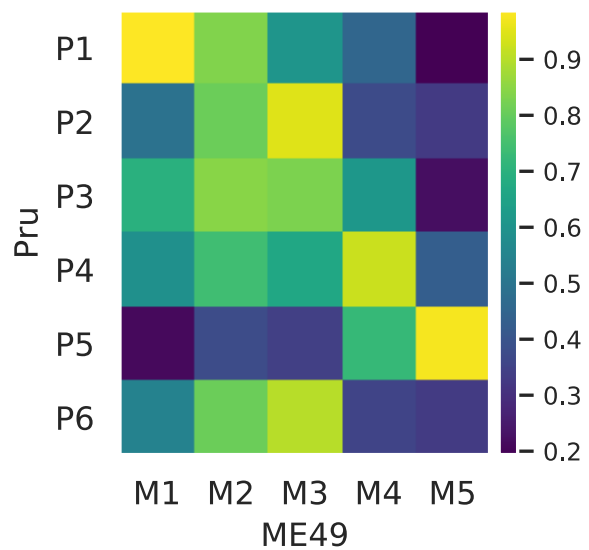**c**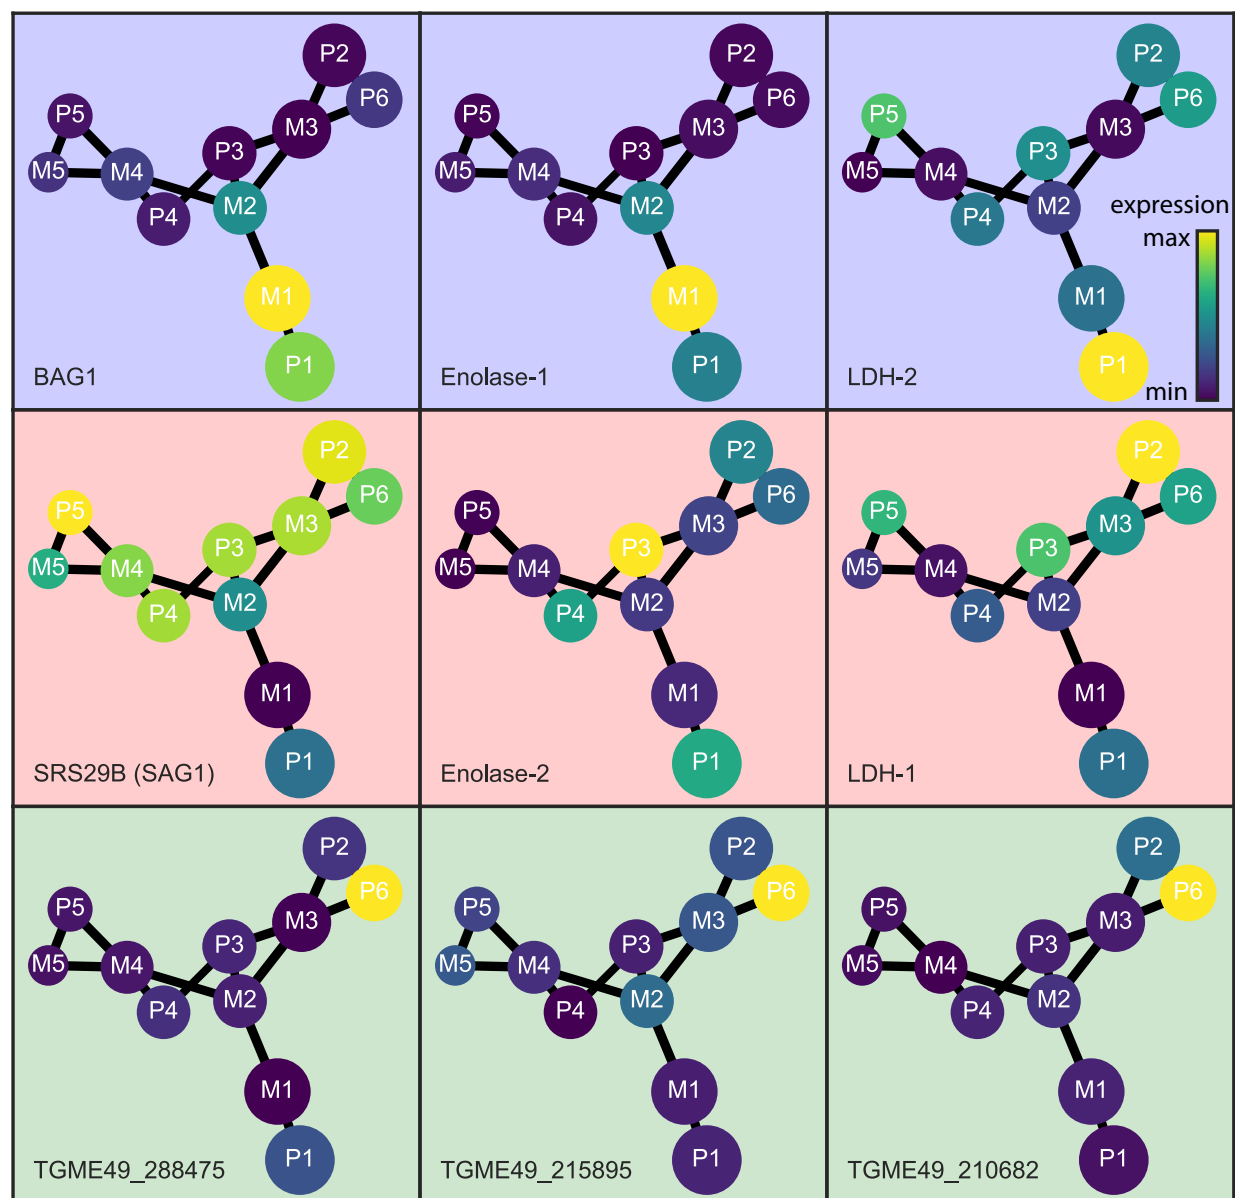

Supplement: supp [file elife-54129-supp-v1.zip › elife_poa_e54129_Figure_3_figure_supplement_4.pdf]

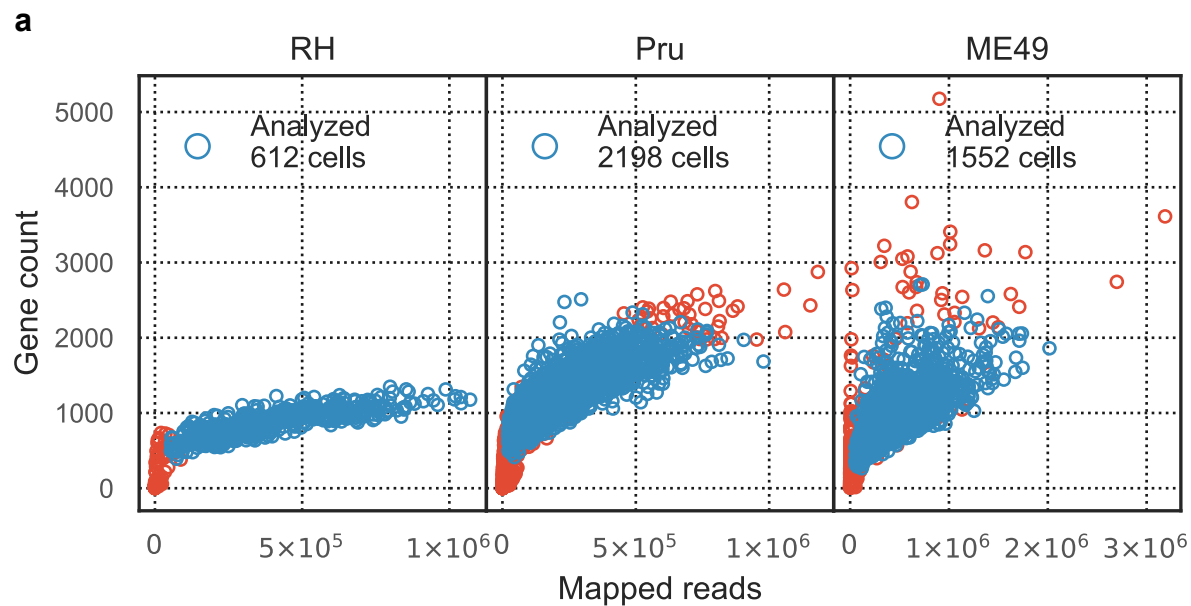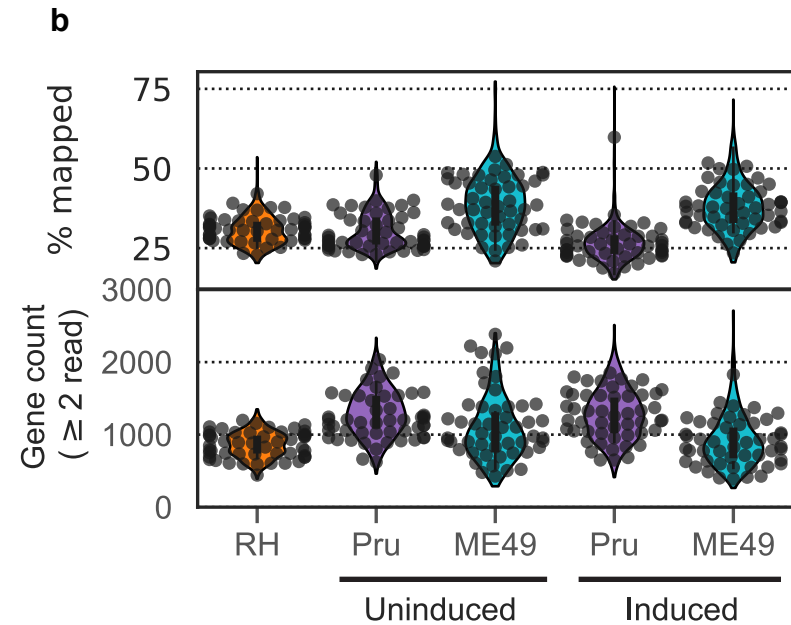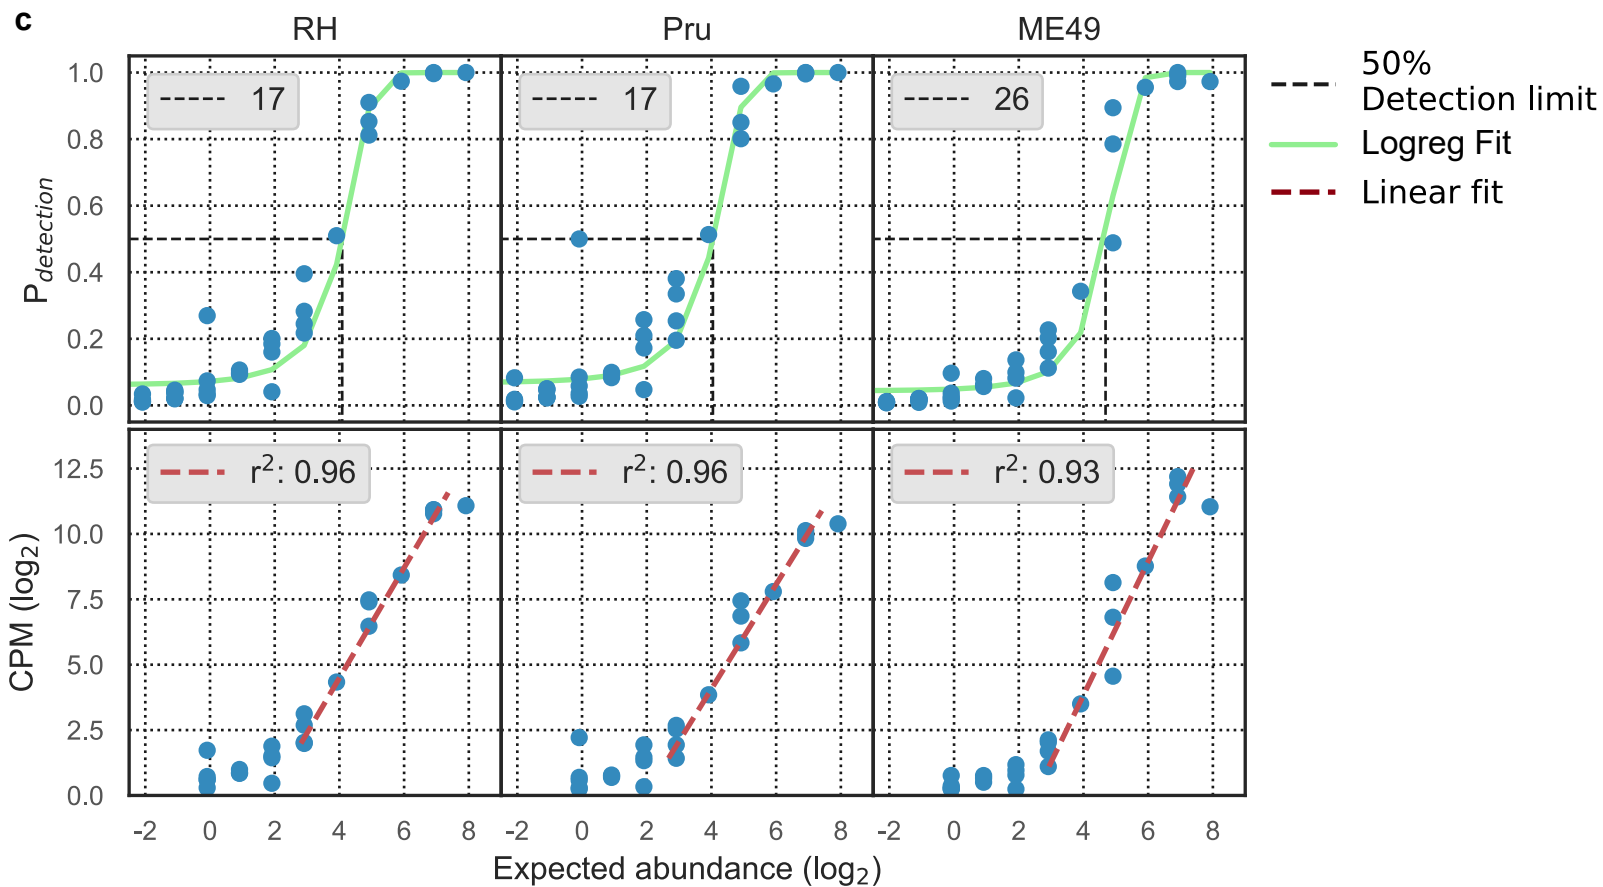

Supplement: supp [file elife-54129-supp-v1.zip › elife_poa_e54129_Figure_1_figure_supplement_2.pdf]

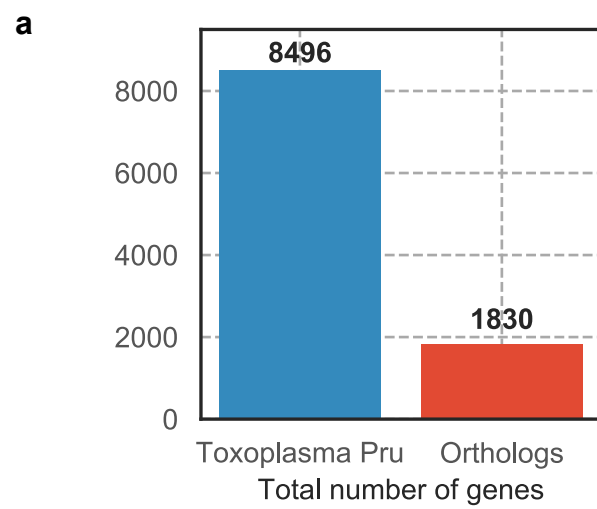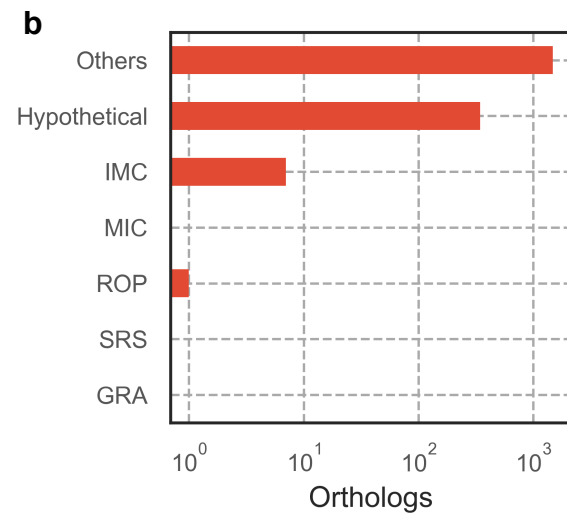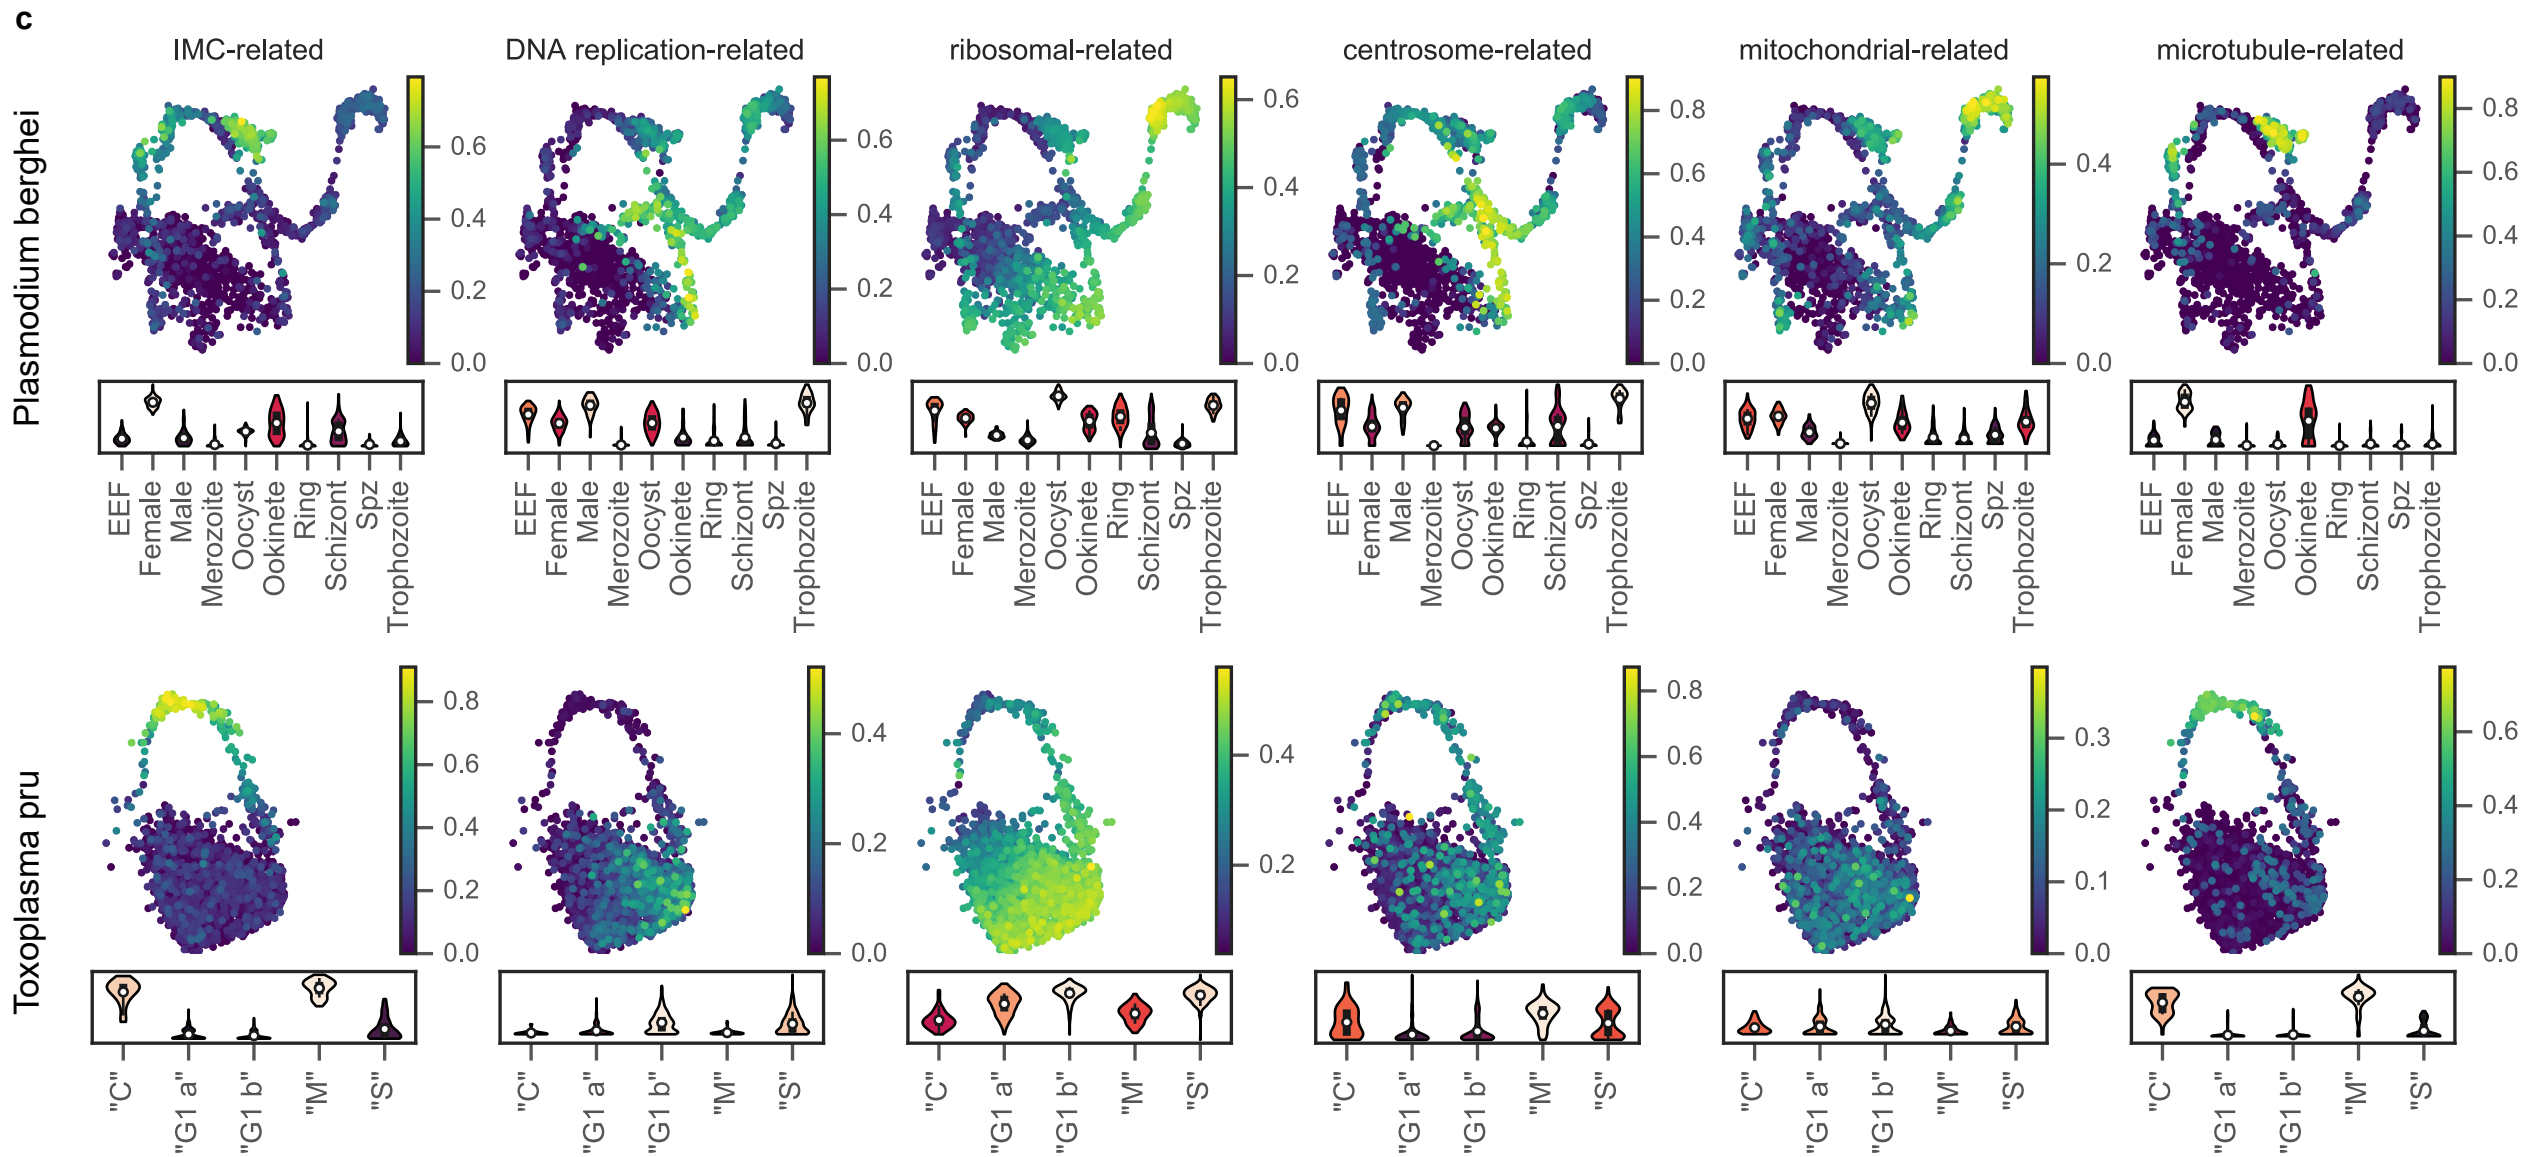

Supplement: supp [file elife-54129-supp-v1.zip › elife_poa_e54129_Figure_6_figure_supplement_1.pdf]

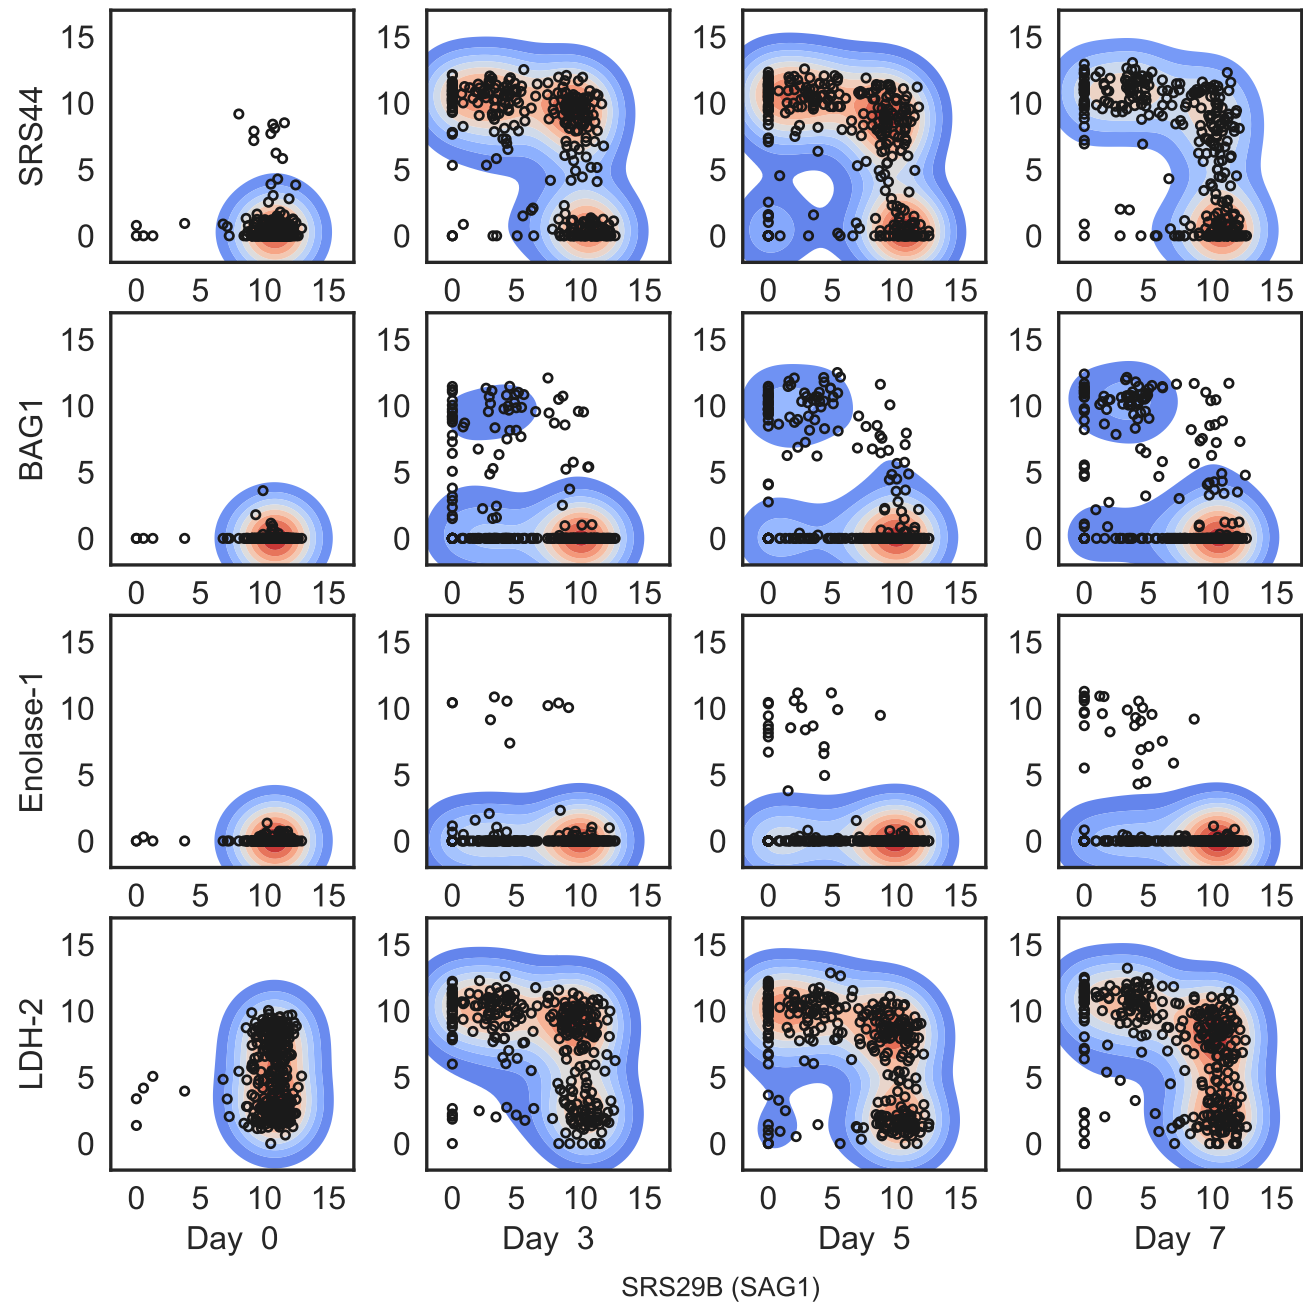

Supplement: supp [file elife-54129-supp-v1.zip › elife_poa_e54129_Figure_3_figure_supplement_2.pdf]

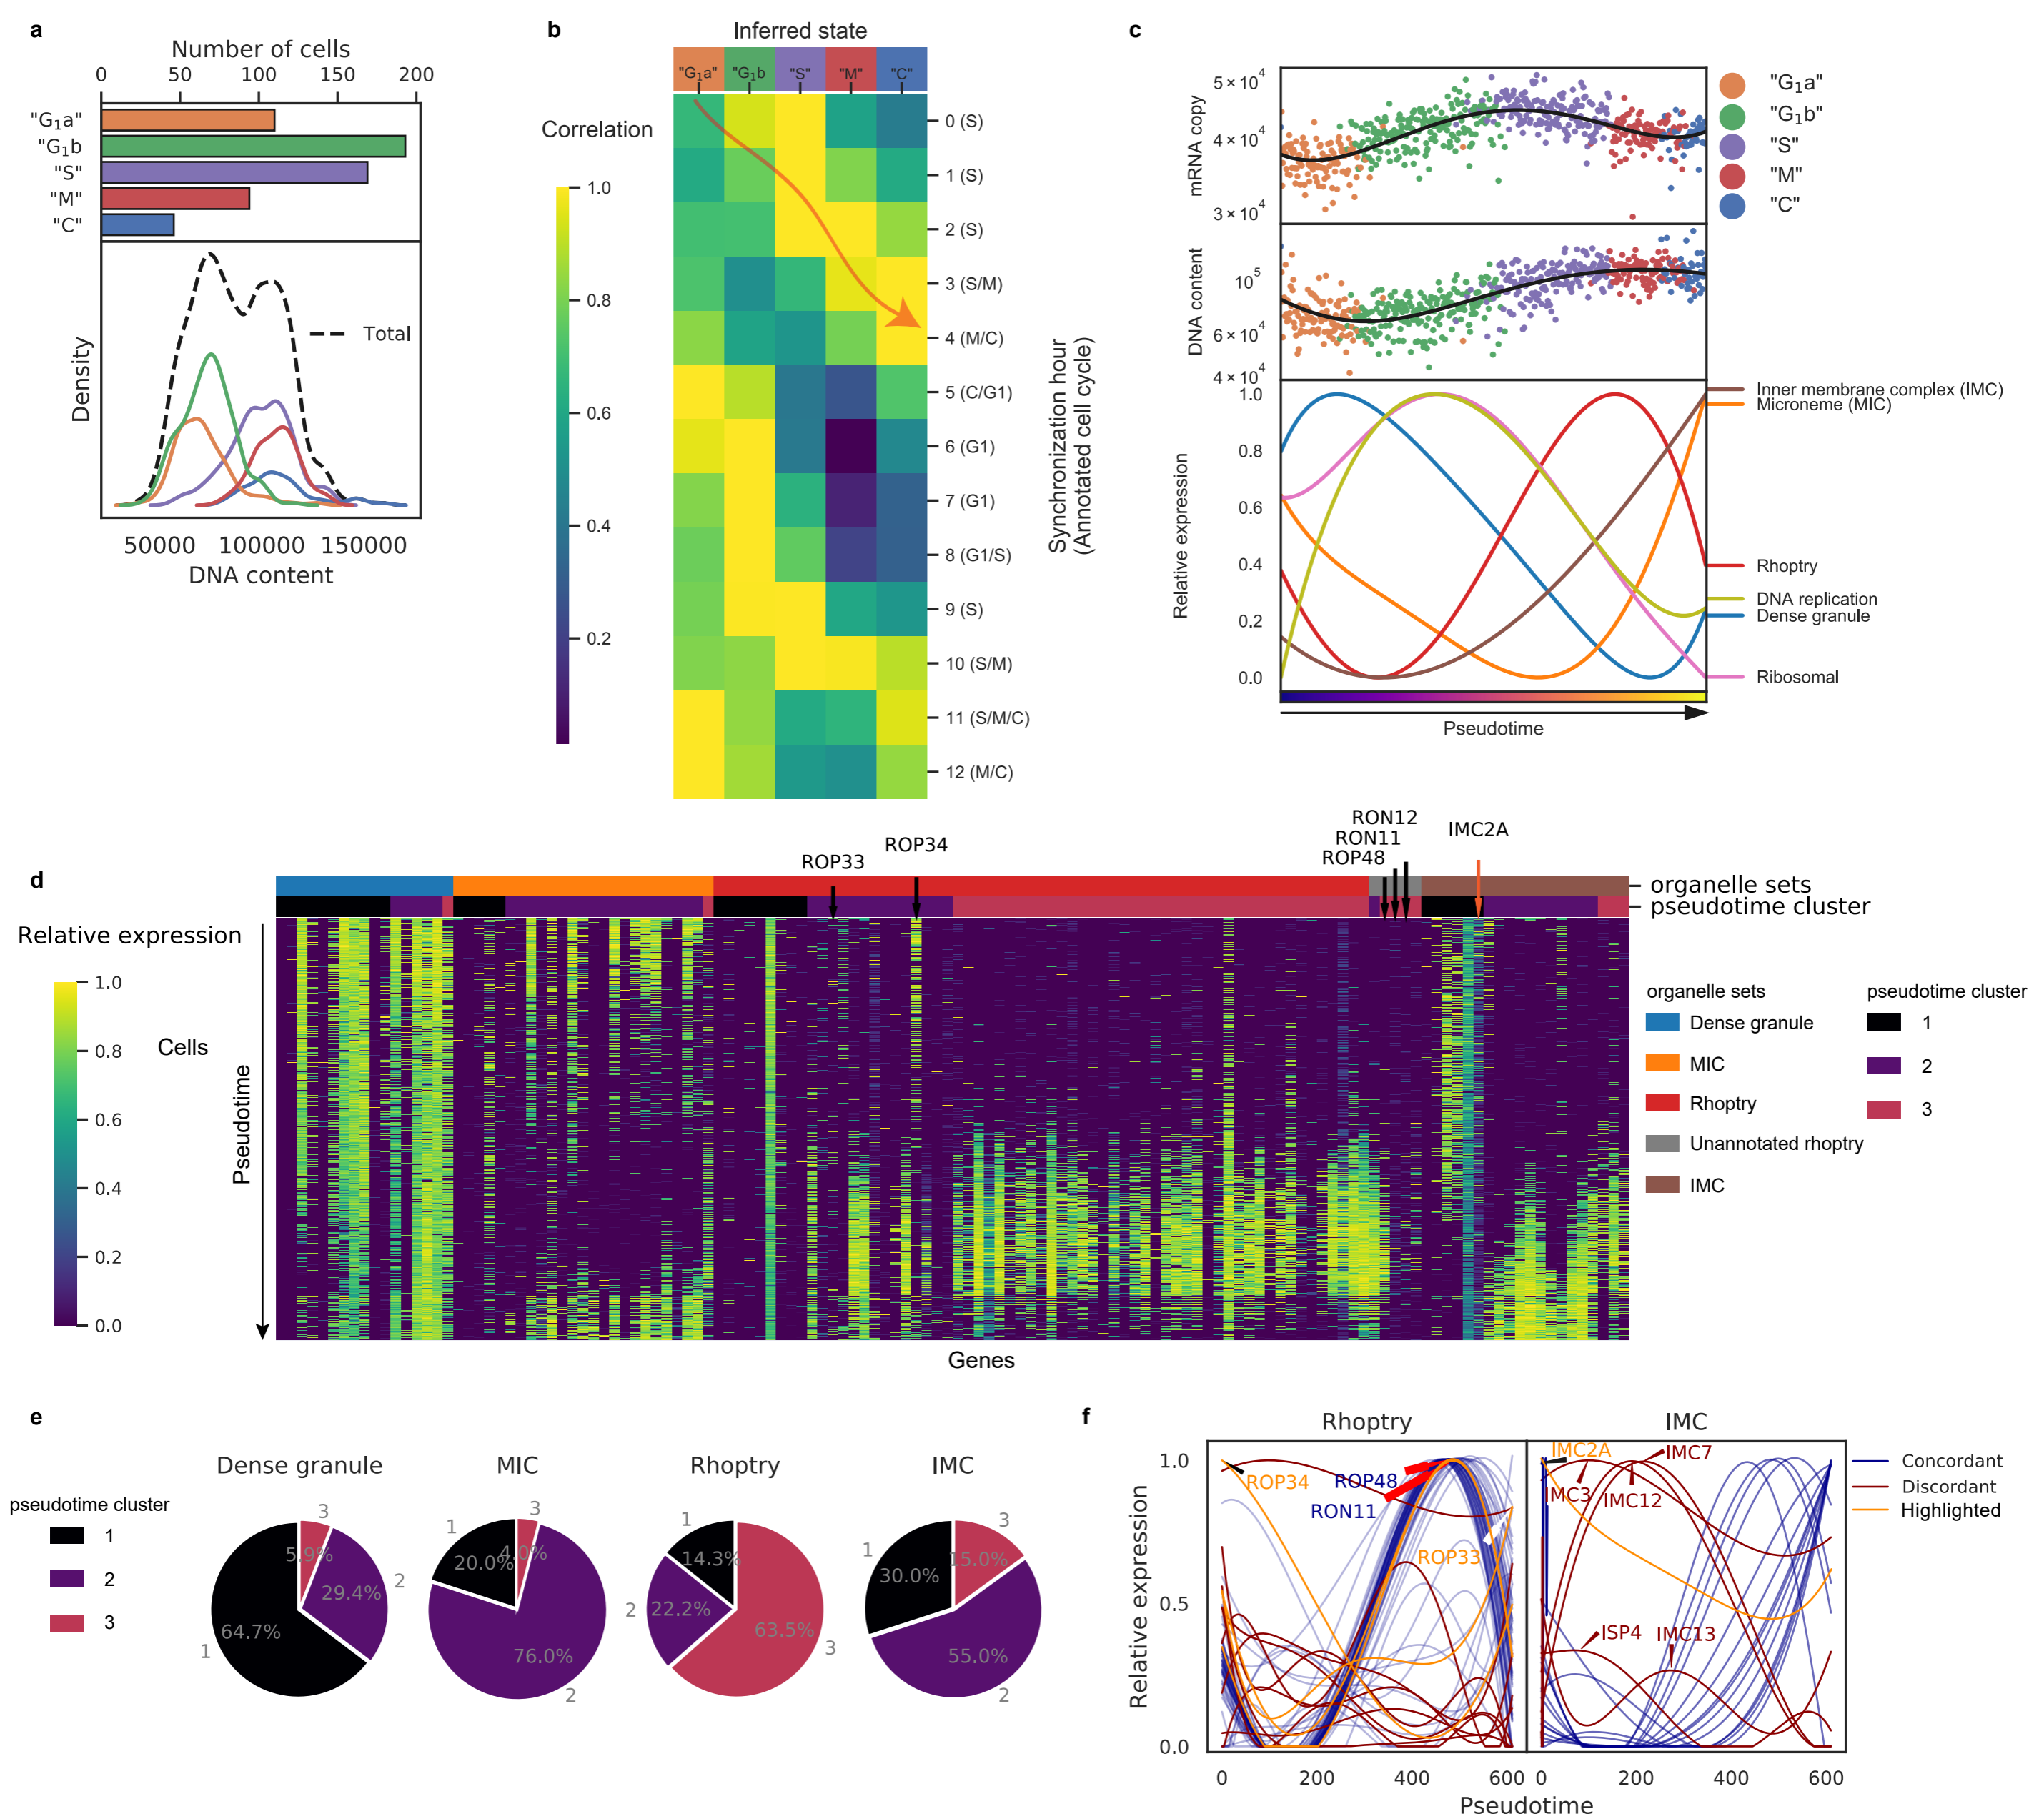

Supplement: supp [file elife-54129-supp-v1.zip › elife_poa_e54129_Figure_2_figure_supplement_1.pdf]

SAG-related surface (SRS) antigen expression frequency

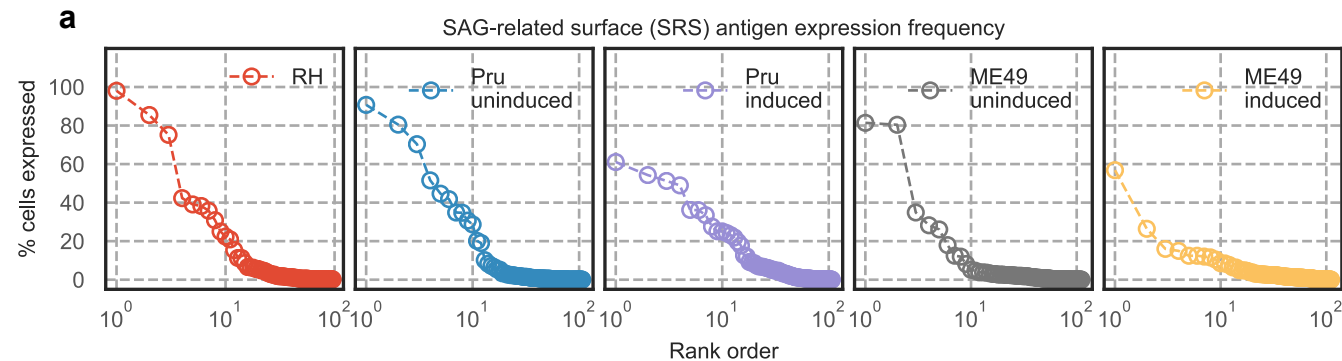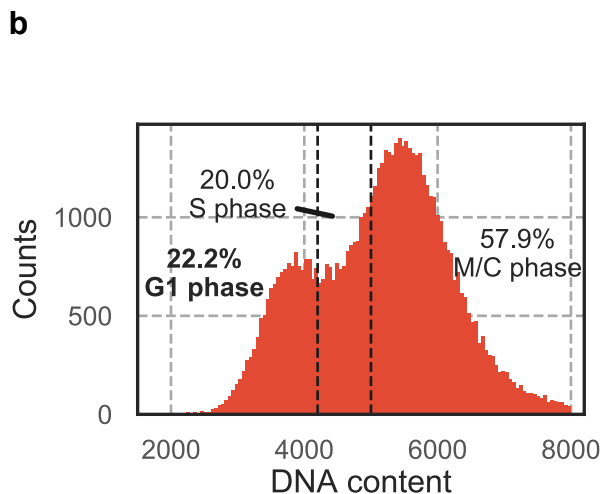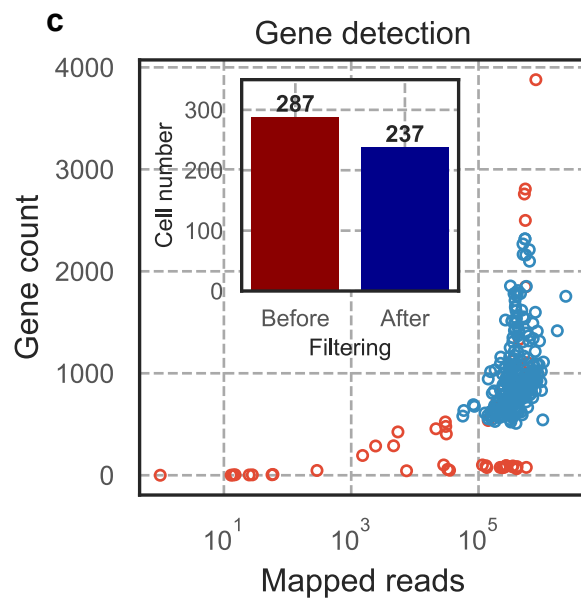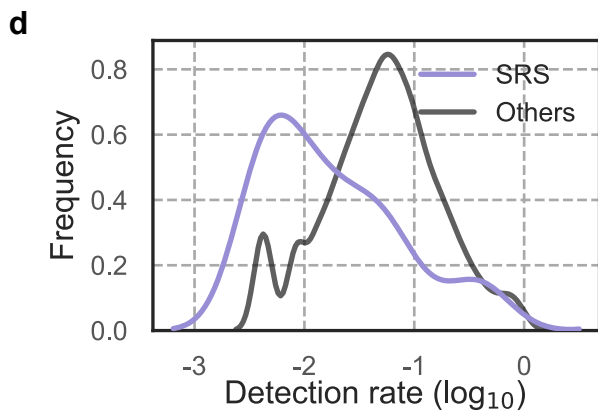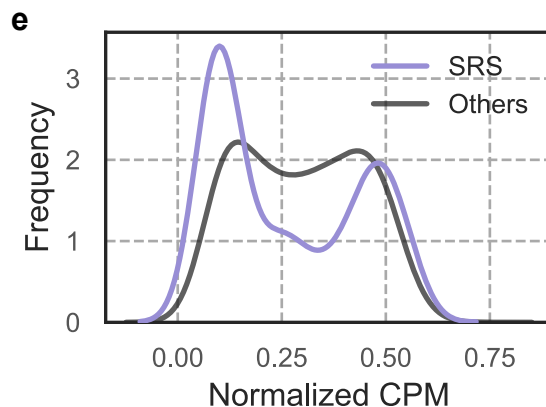

Supplement: supp [file elife-54129-supp-v1.zip › elife_poa_e54129_Figure_4_figure_supplement_1.pdf]

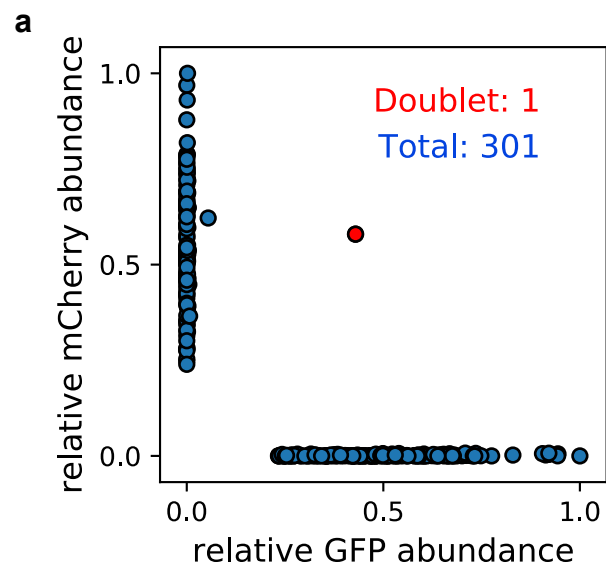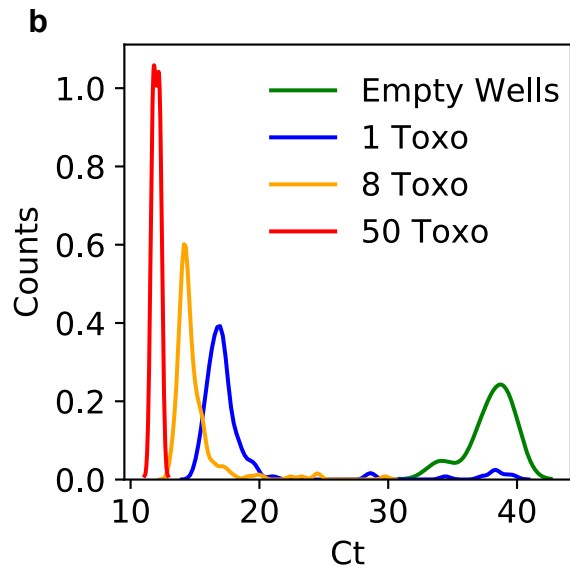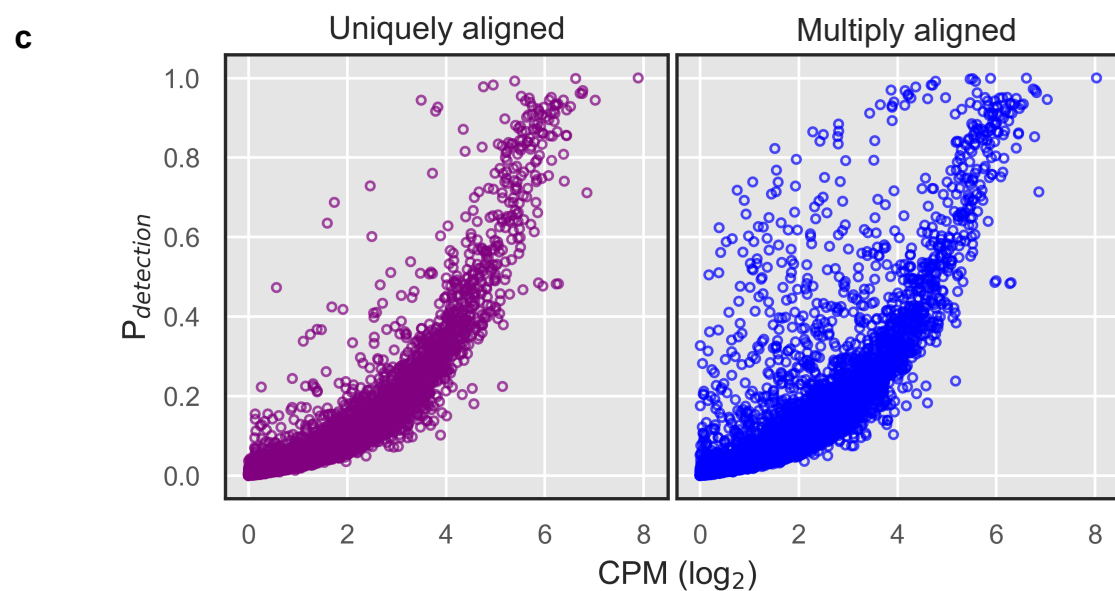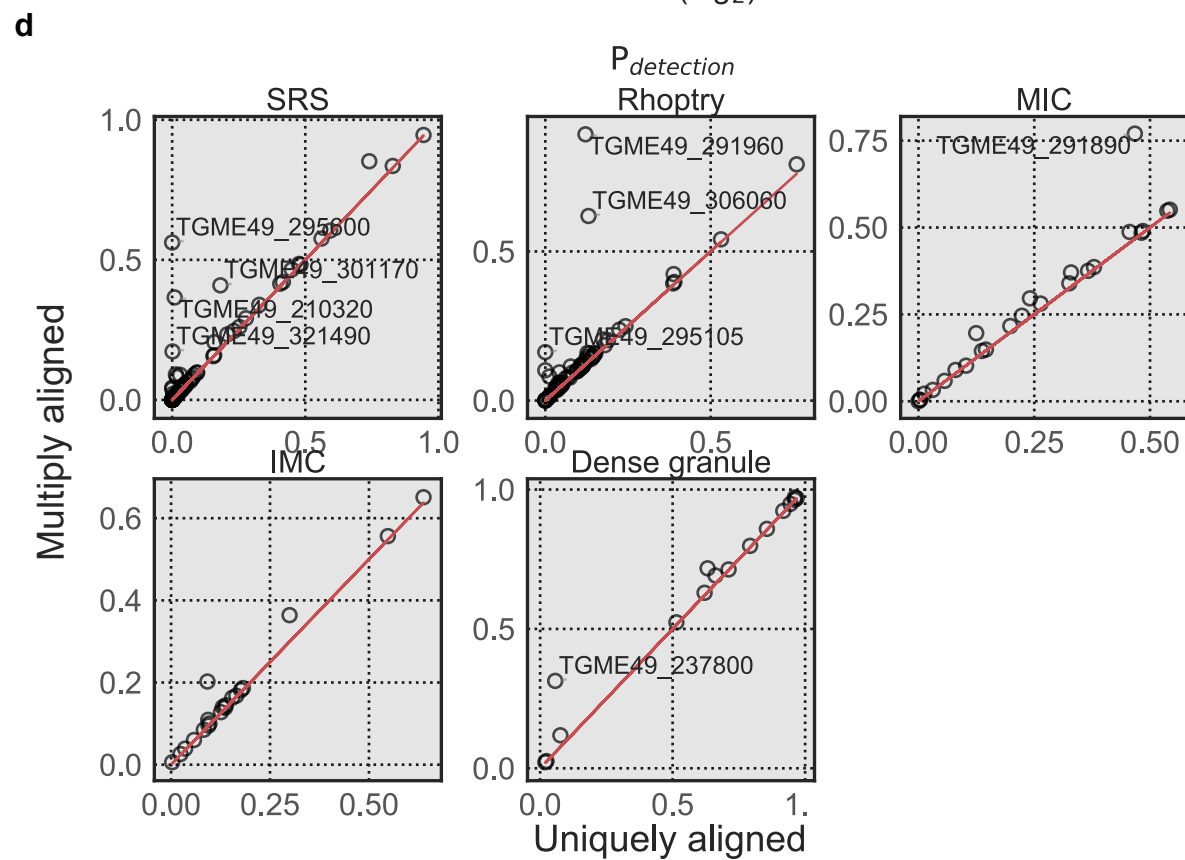

Supplement: supp [file elife-54129-supp-v1.zip › elife_poa_e54129_Figure_1_figure_supplement_1.pdf]
